# Supplementary material for: Proteomic and metabolomic dissection of the BRAF V600E mutation-induced cellular state transition in lung epithelial cells
Source: Royal Society of Chemistry journal article supplement (doi:10.1039/d4mo00249k), 2025-04-22
Supplement: d4mo00249k7.xlsx [file d4mo00249k7.xlsx]

## Sheet: BEAS_2B_Proteomics_NormData
name	WT_1	WT_2	WT_3	VE_1	VE_2	VE_3	Protein.Group	Protein.Ids	Protein.Names	Genes	First.Protein.Description	ID	imputed	num_NAs	VE_vs_WT_CI.L	VE_vs_WT_CI.R	VE_vs_WT_diff	VE_vs_WT_p.adj	VE_vs_WT_p.val	VE_vs_WT_t.stastic	significant	VE_vs_WT_significant	change	change.adj
AAAS	21.7993	21.918	21.9607	21.7407	21.7613	21.7306	Q9NRG9	Q9NRG9	AAAS_HUMAN	AAAS	Aladin	Q9NRG9	FALSE	0	-0.271453	-0.0255067	-0.14848	0.0460427	0.02574	-2.98484	FALSE	FALSE	Stable	Stable
AACS	21.9179	21.985	21.9425	22.0093	22.032	22.0294	Q86V21	Q86V21	AACS_HUMAN	AACS	Acetoacetyl-CoA synthetase	Q86V21	FALSE	0	-0.00690443	0.157056	0.0750758	0.102712	0.0660454	2.26389	FALSE	FALSE	Stable	Stable
AAGAB	20.6164	20.3614	20.5693	20.5562	20.1355	20.2841	Q6PD74	Q6PD74	AAGAB_HUMAN	AAGAB	Alpha- and gamma-adaptin-binding protein p34	Q6PD74	FALSE	0	-0.499225	0.118376	-0.190425	0.240746	0.180288	-1.52444	FALSE	FALSE	Stable	Stable
AAK1	21.3577	21.343	21.378	21.0186	20.9652	21.0152	Q2M2I8	Q2M2I8	AAK1_HUMAN	AAK1	AP2-associated protein kinase 1	Q2M2I8	FALSE	0	-0.441044	-0.278793	-0.359918	0.000371954	4.48835e-05	-10.9676	FALSE	FALSE	Stable	Stable
AAMDC	21.6575	21.7044	21.644	21.2422	21.3179	21.2159	Q9H7C9	Q9H7C9	AAMDC_HUMAN	AAMDC	Mth938 domain-containing protein	Q9H7C9	FALSE	0	-0.511263	-0.308652	-0.409958	0.000523367	7.44779e-05	-10.004	FALSE	FALSE	Stable	Stable
AAMP	21.233	21.2622	21.267	21.6725	21.668	21.6378	Q13685	Q13685	AAMP_HUMAN	AAMP	Angio-associated migratory cell protein	Q13685	FALSE	0	0.3288	0.481889	0.405344	0.000193818	1.67679e-05	13.091	FALSE	FALSE	Stable	Stable
AAR2	20.8582	20.8521	20.9179	21.2872	21.1134	21.2752	Q9Y312	Q9Y312	AAR2_HUMAN	AAR2	Protein AAR2 homolog	Q9Y312	FALSE	0	0.207521	0.490895	0.349208	0.00349502	0.00103658	6.09282	FALSE	FALSE	Stable	Stable
AARS1	24.2391	24.2155	24.2207	24.7257	24.6677	24.6453	P49588	P49588	SYAC_HUMAN	AARS1	Alanine--tRNA ligase, cytoplasmic	P49588	FALSE	0	0.3677	0.541281	0.45449	0.000200679	1.78496e-05	12.9455	FALSE	FALSE	Stable	Stable
AARS2	22.1155	22.1579	22.2145	21.8304	21.8977	21.9314	Q5JTZ9	Q5JTZ9	SYAM_HUMAN	AARS2	Alanine--tRNA ligase, mitochondrial	Q5JTZ9	FALSE	0	-0.386185	-0.166088	-0.276137	0.00326232	0.000946137	-6.20304	FALSE	FALSE	Stable	Stable
AARSD1	21.988	21.9867	22.0331	21.7915	21.6882	21.822	Q9BTE6	Q9BTE6	AASD1_HUMAN	AARSD1	Alanyl-tRNA editing protein Aarsd1	Q9BTE6	FALSE	0	-0.348619	-0.122089	-0.235354	0.00681222	0.00242222	-5.13676	FALSE	FALSE	Stable	Stable
AASDHPPT	22.4048	22.3525	22.355	22.5639	22.466	22.6354	Q9NRN7	Q9NRN7	ADPPT_HUMAN	AASDHPPT	L-aminoadipate-semialdehyde dehydrogenase-phosphopantetheinyl transferase	Q9NRN7	FALSE	0	0.0564643	0.312163	0.184314	0.0257517	0.0127249	3.56388	FALSE	FALSE	Stable	Stable
AASS	20.3786	20.3668	20.3293	20.8282	20.7539	20.7246	Q9UDR5	Q9UDR5	AASS_HUMAN	AASS	Alpha-aminoadipic semialdehyde synthase, mitochondrial	Q9UDR5	FALSE	0	0.311407	0.509896	0.410651	0.000485628	6.59179e-05	10.2289	FALSE	FALSE	Stable	Stable
AATF	18.4439	18.9393	18.4172	19.2215	19.1336	18.8636	Q9NY61	Q9NY61	AATF_HUMAN	AATF	Protein AATF	Q9NY61	FALSE	0	0.052657	0.892807	0.472732	0.0576378	0.0333356	2.78197	FALSE	FALSE	Stable	Stable
ABCA3	19.084	19.1239	19.2098	18.6253	18.7405	18.7007	Q99758	Q99758	ABCA3_HUMAN	ABCA3	Phospholipid-transporting ATPase ABCA3	Q99758	FALSE	0	-0.575124	-0.325576	-0.45035	0.000798763	0.000138973	-8.92256	FALSE	FALSE	Stable	Stable
ABCB10	21.1051	21.1345	21.0782	21.4483	21.4131	21.4065	Q9NRK6	Q9NRK6	ABCBA_HUMAN	ABCB10	ATP-binding cassette sub-family B member 10, mitochondrial	Q9NRK6	FALSE	0	0.234759	0.398671	0.316715	0.000620741	9.58491e-05	9.55323	FALSE	FALSE	Stable	Stable
ABCB6	19.3163	19.4888	19.5063	19.1634	19.1768	19.0939	Q9NP58	Q9NP58	ABCB6_HUMAN	ABCB6	ATP-binding cassette sub-family B member 6	Q9NP58	FALSE	0	-0.445043	-0.139812	-0.292428	0.00927659	0.00357206	-4.73678	FALSE	FALSE	Stable	Stable
ABCB7	21.1205	21.0812	21.1926	21.1277	20.9574	21.0499	O75027	O75027	ABCB7_HUMAN	ABCB7	Iron-sulfur clusters transporter ABCB7, mitochondrial	O75027	FALSE	0	-0.226729	0.0538674	-0.0864308	0.241152	0.180655	-1.52293	FALSE	FALSE	Stable	Stable
ABCB8	19.6734	19.8141	19.6829	19.4098	19.4487	19.5768	Q9NUT2	Q9NUT2	MITOS_HUMAN	ABCB8	Mitochondrial potassium channel ATP-binding subunit	Q9NUT2	FALSE	0	-0.401345	-0.0886849	-0.245015	0.0192684	0.00890836	-3.87448	FALSE	FALSE	Stable	Stable
ABCC1	21.9726	21.9456	22.0432	22.4332	22.3874	22.4482	P33527	P33527	MRP1_HUMAN	ABCC1	Multidrug resistance-associated protein 1	P33527	FALSE	0	0.336381	0.535221	0.435801	0.000387622	4.79723e-05	10.8363	FALSE	FALSE	Stable	Stable
ABCC3	17.1951	17.5497	17.4742	17.9427	18.0207	17.6042	O15438	O15438	MRP3_HUMAN	ABCC3	ATP-binding cassette sub-family C member 3	O15438	FALSE	0	0.0979473	0.801132	0.44954	0.0383467	0.0206687	3.16077	FALSE	FALSE	Stable	Stable
ABCC4	21.1573	21.1179	21.1174	21.3211	21.2164	21.25	O15439	O15439	MRP4_HUMAN	ABCC4	ATP-binding cassette sub-family C member 4	O15439	FALSE	0	0.0333742	0.22996	0.131667	0.0329514	0.0171908	3.31146	FALSE	FALSE	Stable	Stable
ABCC5	18.3877	17.8384	18.4864	19.4288	19.3106	19.3346	O15440	O15440	MRP5_HUMAN	ABCC5	ATP-binding cassette sub-family C member 5	O15440	FALSE	0	0.692848	1.54821	1.12053	0.00276133	0.000758165	6.4769	TRUE	TRUE	Up	Up
ABCD1	20.7549	20.8361	20.8605	20.3566	20.3272	20.319	P33897	P33897	ABCD1_HUMAN	ABCD1	ATP-binding cassette sub-family D member 1	P33897	FALSE	0	-0.581661	-0.384064	-0.482863	0.00025953	2.62371e-05	-12.0819	FALSE	FALSE	Stable	Stable
ABCD3	23.4892	23.553	23.4815	23.2232	23.2178	23.1989	P28288	P28288	ABCD3_HUMAN	ABCD3	ATP-binding cassette sub-family D member 3	P28288	FALSE	0	-0.379971	-0.209242	-0.294606	0.000931456	0.000177055	-8.53155	FALSE	FALSE	Stable	Stable
ABCE1	24.2535	24.221	24.2334	24.3854	24.3656	24.3564	P61221	P61221	ABCE1_HUMAN	ABCE1	ATP-binding cassette sub-family E member 1	P61221	FALSE	0	0.0585416	0.207776	0.133159	0.0121493	0.00497812	4.41159	FALSE	FALSE	Stable	Stable
ABCF1	24.0734	24.0723	24.0028	23.8577	23.894	23.8867	Q8NE71	Q8NE71	ABCF1_HUMAN	ABCF1	ATP-binding cassette sub-family F member 1	Q8NE71	FALSE	0	-0.257846	-0.082217	-0.170031	0.00893878	0.00339939	-4.7866	FALSE	FALSE	Stable	Stable
ABCF2	22.0765	22.0773	22.0488	22.0981	22.2281	22.1597	Q9UG63	Q9UG63	ABCF2_HUMAN	ABCF2	ATP-binding cassette sub-family F member 2	Q9UG63	FALSE	0	-0.0115279	0.200492	0.094482	0.11016	0.0716714	2.20327	FALSE	FALSE	Stable	Stable
ABCF3	21.1714	21.1372	21.094	21.7007	21.6397	21.7259	Q9NUQ8	Q9NUQ8	ABCF3_HUMAN	ABCF3	ATP-binding cassette sub-family F member 3	Q9NUQ8	FALSE	0	0.455656	0.653467	0.554562	0.000159968	1.21732e-05	13.861	TRUE	TRUE	Up	Up
ABHD10	22.3741	22.4298	22.4702	22.5291	22.5654	22.5478	Q9NUJ1	Q9NUJ1	ABHDA_HUMAN	ABHD10	Palmitoyl-protein thioesterase ABHD10, mitochondrial	Q9NUJ1	FALSE	0	0.0298007	0.215692	0.122746	0.0345783	0.0181954	3.2647	FALSE	FALSE	Stable	Stable
ABHD11	20.8581	21.0461	20.6889	21.0999	21.1973	21.3494	Q8NFV4	Q8NFV4	ABHDB_HUMAN	ABHD11	Protein ABHD11	Q8NFV4	FALSE	0	0.0820226	0.620323	0.351173	0.0360121	0.019089	3.22545	FALSE	FALSE	Stable	Stable
ABHD12	21.9053	21.8566	21.841	21.7371	21.6854	21.7733	Q8N2K0	Q8N2K0	ABD12_HUMAN	ABHD12	Lysophosphatidylserine lipase ABHD12	Q8N2K0	FALSE	0	-0.231805	-0.0396787	-0.135742	0.0276204	0.0138297	-3.49318	FALSE	FALSE	Stable	Stable
ABHD14B	21.9786	22.0531	21.6151	22.1628	22.0449	22.1189	Q96IU4	Q96IU4	ABHEB_HUMAN	ABHD14B	Putative protein-lysine deacylase ABHD14B	Q96IU4	FALSE	0	-0.0693582	0.522621	0.226631	0.157259	0.109281	1.89281	FALSE	FALSE	Stable	Stable
ABHD16A	21.4904	21.5318	21.4835	21.1349	21.1484	21.0779	O95870	O95870	ABHGA_HUMAN	ABHD16A	Phosphatidylserine lipase ABHD16A	O95870	FALSE	0	-0.469935	-0.293066	-0.3815	0.000413287	5.23973e-05	-10.6644	FALSE	FALSE	Stable	Stable
ABHD17A	19.4204	19.4186	19.4164	19.6291	19.5916	19.5377	Q96GS6	Q96GS6	AB17A_HUMAN	ABHD17A	Alpha/beta hydrolase domain-containing protein 17A	Q96GS6	FALSE	0	0.0789586	0.256386	0.167672	0.00978093	0.0038104	4.67235	FALSE	FALSE	Stable	Stable
ABHD17B	21.0129	20.7287	21.0157	21.2747	21.3128	21.1605	Q5VST6	Q5VST6	AB17B_HUMAN	ABHD17B	Alpha/beta hydrolase domain-containing protein 17B	Q5VST6	FALSE	0	0.101596	0.558774	0.330185	0.025617	0.0126221	3.57081	FALSE	FALSE	Stable	Stable
ABHD2	14.056	15.6234	15.9122	15.4406	14.9038	15.2075	P08910	P08910	ABHD2_HUMAN	ABHD2	Monoacylglycerol lipase ABHD2	P08910	TRUE	1	-1.24581	1.21937	-0.0132164	0.983929	0.979748	-0.026507	FALSE	FALSE	Stable	Stable
ABHD4	19.8819	19.6677	19.6389	19.7302	19.6367	19.7311	Q8TB40	Q8TB40	ABHD4_HUMAN	ABHD4	(Lyso)-N-acylphosphatidylethanolamine lipase	Q8TB40	FALSE	0	-0.214558	0.154194	-0.030182	0.750376	0.700319	-0.404676	FALSE	FALSE	Stable	Stable
ABHD6	18.478	19.1242	18.9754	19.0705	18.8086	18.9997	Q9BV23	Q9BV23	ABHD6_HUMAN	ABHD6	Monoacylglycerol lipase ABHD6	Q9BV23	FALSE	0	-0.338827	0.539598	0.100386	0.6533	0.593375	0.565017	FALSE	FALSE	Stable	Stable
ABHD8	16.4376	16.7093	16.2759	16.0529	16.0287	16.2377	Q96I13	Q96I13	ABHD8_HUMAN	ABHD8	Protein ABHD8	Q96I13	FALSE	0	-0.669924	-0.0657204	-0.367822	0.0448316	0.0249417	-3.00988	FALSE	FALSE	Stable	Stable
ABI1	23.3672	23.4061	23.3066	23.0412	23.0756	23.0173	Q8IZP0	Q8IZP0;Q9NYB9	ABI1_HUMAN	ABI1	Abl interactor 1	Q8IZP0	FALSE	0	-0.413513	-0.217104	-0.315308	0.00123035	0.000260798	-7.93722	FALSE	FALSE	Stable	Stable
ABI2	21.6501	21.7749	21.6624	20.9108	21.0535	21.085	Q9NYB9	Q9NYB9	ABI2_HUMAN	ABI2	Abl interactor 2	Q9NYB9	FALSE	0	-0.833517	-0.525199	-0.679358	0.000381023	4.65811e-05	-10.8941	TRUE	TRUE	Down	Down
ABITRAM	18.4085	18.6153	18.6011	18.1149	17.9854	17.8994	Q9NX38	Q9NX38	ABITM_HUMAN	ABITRAM	Protein Abitram	Q9NX38	FALSE	0	-0.742749	-0.340726	-0.541737	0.00246881	0.000655261	-6.66241	TRUE	TRUE	Down	Down
ABL1	20.5106	20.5137	20.3765	20.6996	20.4088	20.6674	P00519	P00519;P42684	ABL1_HUMAN	ABL1	Tyrosine-protein kinase ABL1	P00519	FALSE	0	-0.0974595	0.347548	0.125044	0.279331	0.21609	1.38928	FALSE	FALSE	Stable	Stable
ABL2	19.5773	19.4857	19.2354	19.461	19.6583	19.6979	P42684	P42684	ABL2_HUMAN	ABL2	Tyrosine-protein kinase ABL2	P42684	FALSE	0	-0.0953645	0.441198	0.172917	0.222286	0.16426	1.59335	FALSE	FALSE	Stable	Stable
ABLIM1	20.9147	20.8693	20.8671	19.3411	19.3746	19.2219	O14639	O14639	ABLM1_HUMAN	ABLIM1	Actin-binding LIM protein 1	O14639	FALSE	0	-1.69373	-1.4486	-1.57116	1.06232e-05	1.1056e-07	-31.6898	TRUE	TRUE	Down	Down
ABLIM3	18.8205	18.6267	18.4803	18.6561	18.6967	18.8224	O94929	O94929	ABLM3_HUMAN	ABLIM3	Actin-binding LIM protein 3	O94929	FALSE	0	-0.155568	0.320723	0.0825776	0.496623	0.425568	0.857202	FALSE	FALSE	Stable	Stable
ABR	21.8323	21.8448	21.9019	21.7517	21.747	21.7931	Q12979	Q12979	ABR_HUMAN	ABR	Active breakpoint cluster region-related protein	Q12979	FALSE	0	-0.183672	-0.00779955	-0.0957358	0.0638454	0.037485	-2.69135	FALSE	FALSE	Stable	Stable
ABRACL	24.3894	24.4868	24.401	24.9266	25.1165	25.0579	Q9P1F3	Q9P1F3	ABRAL_HUMAN	ABRACL	Costars family protein ABRACL	Q9P1F3	FALSE	0	0.458733	0.757158	0.607945	0.000508359	7.1753e-05	10.0722	TRUE	TRUE	Up	Up
ABRAXAS1	18.8085	18.9023	18.6462	18.7239	18.7384	18.7557	Q6UWZ7	Q6UWZ7	ABRX1_HUMAN	ABRAXAS1	BRCA1-A complex subunit Abraxas 1	Q6UWZ7	FALSE	0	-0.216581	0.123917	-0.0463318	0.592794	0.527163	-0.672757	FALSE	FALSE	Stable	Stable
ABRAXAS2	20.9859	20.9969	20.9915	21.0107	20.9637	21.0401	Q15018	Q15018	ABRX2_HUMAN	ABRAXAS2	BRISC complex subunit Abraxas 2	Q15018	FALSE	0	-0.0704229	0.0971691	0.0133731	0.75639	0.707392	0.394522	FALSE	FALSE	Stable	Stable
ABT1	21.0567	20.9411	21.1047	21.3188	21.3568	21.2362	Q9ULW3	Q9ULW3	ABT1_HUMAN	ABT1	Activator of basal transcription 1	Q9ULW3	FALSE	0	0.127388	0.412114	0.269751	0.00968169	0.00376545	4.68414	FALSE	FALSE	Stable	Stable
ACAA1	21.3367	21.4434	21.4391	21.6239	21.4935	21.5428	P09110	P09110	THIK_HUMAN	ACAA1	3-ketoacyl-CoA thiolase, peroxisomal	P09110	FALSE	0	0.0197646	0.2742	0.146982	0.0530824	0.0303078	2.85615	FALSE	FALSE	Stable	Stable
ACAA2	21.7423	21.7746	21.7322	18.9722	19.1148	19.1634	P42765	P42765	THIM_HUMAN	ACAA2	3-ketoacyl-CoA thiolase, mitochondrial	P42765	FALSE	0	-2.80605	-2.52637	-2.66621	3.52004e-06	1.1333e-08	-47.133	TRUE	TRUE	Down	Down
ACACA	22.7114	22.7629	22.6582	22.8965	22.836	22.8658	Q13085	Q13085	ACACA_HUMAN	ACACA	Acetyl-CoA carboxylase 1	Q13085	FALSE	0	0.0550155	0.255506	0.155261	0.0200414	0.0093793	3.82879	FALSE	FALSE	Stable	Stable
ACAD10	19.0761	19.0962	19.3312	19.4607	19.7274	19.7559	Q6JQN1	Q6JQN1	ACD10_HUMAN	ACAD10	Acyl-CoA dehydrogenase family member 10	Q6JQN1	FALSE	0	0.213921	0.74642	0.480171	0.0116892	0.00474191	4.45832	FALSE	FALSE	Stable	Stable
ACAD11	21.209	21.2195	21.3259	21.0762	20.9368	20.8416	Q709F0	Q709F0	ACD11_HUMAN	ACAD11	Acyl-CoA dehydrogenase family member 11	Q709F0	FALSE	0	-0.474538	-0.125297	-0.299917	0.0139402	0.00592975	-4.24591	FALSE	FALSE	Stable	Stable
ACAD8	20.2787	20.2548	20.2313	20.0276	20.0604	20.0232	Q9UKU7	Q9UKU7	ACAD8_HUMAN	ACAD8	Isobutyryl-CoA dehydrogenase, mitochondrial	Q9UKU7	FALSE	0	-0.296921	-0.138758	-0.217839	0.00226206	0.000584959	-6.80968	FALSE	FALSE	Stable	Stable
ACAD9	22.7385	22.7886	22.7563	22.8721	22.8163	22.8632	Q9H845	Q9H845	ACAD9_HUMAN	ACAD9	Complex I assembly factor ACAD9, mitochondrial	Q9H845	FALSE	0	0.00539376	0.173459	0.0894264	0.0680949	0.0405676	2.63076	FALSE	FALSE	Stable	Stable
ACADM	23.6829	23.6426	23.6965	23.8791	23.8741	23.8585	P11310	P11310	ACADM_HUMAN	ACADM	Medium-chain specific acyl-CoA dehydrogenase, mitochondrial	P11310	FALSE	0	0.118111	0.274983	0.196547	0.00327723	0.000952709	6.19463	FALSE	FALSE	Stable	Stable
ACADS	21.8198	21.8412	21.8669	21.1174	21.1894	21.3227	P16219	P16219	ACADS_HUMAN	ACADS	Short-chain specific acyl-CoA dehydrogenase, mitochondrial	P16219	FALSE	0	-0.777824	-0.487878	-0.632851	0.000393736	4.90839e-05	-10.7914	TRUE	TRUE	Down	Down
ACADSB	20.8638	20.8258	20.8638	21.6614	21.6495	21.5665	P45954	P45954	ACDSB_HUMAN	ACADSB	Short/branched chain specific acyl-CoA dehydrogenase, mitochondrial	P45954	FALSE	0	0.677992	0.871262	0.774627	4.69457e-05	1.61423e-06	19.8162	TRUE	TRUE	Up	Up
ACADVL	23.9564	23.9004	23.9233	23.3412	23.3293	23.3337	P49748	P49748	ACADV_HUMAN	ACADVL	Very long-chain specific acyl-CoA dehydrogenase, mitochondrial	P49748	FALSE	0	-0.669751	-0.514238	-0.591994	5.63642e-05	2.16311e-06	-18.8212	TRUE	TRUE	Down	Down
ACAP2	21.3651	21.2205	21.2829	21.5976	21.5676	21.5353	Q15057	Q15057	ACAP2_HUMAN	ACAP2	Arf-GAP with coiled-coil, ANK repeat and PH domain-containing protein 2	Q15057	FALSE	0	0.160286	0.394387	0.277336	0.00407682	0.00126531	5.85731	FALSE	FALSE	Stable	Stable
ACAP3	17.4243	17.271	17.7994	17.4017	17.3438	17.2164	Q96P50	Q96P50	ACAP3_HUMAN	ACAP3	Arf-GAP with coiled-coil, ANK repeat and PH domain-containing protein 3	Q96P50	FALSE	0	-0.527133	0.171923	-0.177605	0.324122	0.257628	-1.25614	FALSE	FALSE	Stable	Stable
ACAT1	24.2358	24.247	24.2671	24.3183	24.278	24.2274	P24752	P24752	THIL_HUMAN	ACAT1	Acetyl-CoA acetyltransferase, mitochondrial	P24752	FALSE	0	-0.0657815	0.114963	0.0245906	0.592794	0.527217	0.672666	FALSE	FALSE	Stable	Stable
ACAT2	23.378	23.4615	23.4184	23.8298	23.8795	23.8152	Q9BWD1	Q9BWD1	THIC_HUMAN	ACAT2	Acetyl-CoA acetyltransferase, cytosolic	Q9BWD1	FALSE	0	0.32756	0.516771	0.422166	0.000366118	4.34655e-05	11.0314	FALSE	FALSE	Stable	Stable
ACBD3	21.6107	21.5334	21.4458	21.5812	21.67	21.7444	Q9H3P7	Q9H3P7	GCP60_HUMAN	ACBD3	Golgi resident protein GCP60	Q9H3P7	FALSE	0	-0.0195679	0.290043	0.135237	0.115533	0.0760299	2.15961	FALSE	FALSE	Stable	Stable
ACBD5	21.5084	21.5449	21.5956	21.6533	21.6817	21.6773	Q5T8D3	Q5T8D3	ACBD5_HUMAN	ACBD5	Acyl-CoA-binding domain-containing protein 5	Q5T8D3	FALSE	0	0.0321071	0.210083	0.121095	0.0312649	0.0161337	3.36403	FALSE	FALSE	Stable	Stable
ACBD6	20.7456	20.6606	20.8035	20.685	20.6783	20.5785	Q9BR61	Q9BR61	ACBD6_HUMAN	ACBD6	Acyl-CoA-binding domain-containing protein 6	Q9BR61	FALSE	0	-0.220482	0.0419355	-0.0892734	0.200912	0.145645	-1.68199	FALSE	FALSE	Stable	Stable
ACD	18.8743	19.2293	18.8902	19.0008	19.0716	18.9239	Q96AP0	Q96AP0	ACD_HUMAN	ACD	Adrenocortical dysplasia protein homolog	Q96AP0	FALSE	0	-0.262752	0.264434	0.000840724	0.995514	0.993975	0.00788467	FALSE	FALSE	Stable	Stable
ACIN1	23.3433	23.422	23.3263	23.2072	23.239	23.2314	Q9UKV3	Q9UKV3	ACINU_HUMAN	ACIN1	Apoptotic chromatin condensation inducer in the nucleus	Q9UKV3	FALSE	0	-0.232567	-0.0433272	-0.137947	0.0248023	0.0121408	-3.60408	FALSE	FALSE	Stable	Stable
ACLY	25.0148	24.9836	24.985	25.1288	25.0865	25.1062	P53396	P53396	ACLY_HUMAN	ACLY	ATP-citrate synthase	P53396	FALSE	0	0.0355843	0.189829	0.112707	0.0245968	0.0120193	3.61271	FALSE	FALSE	Stable	Stable
ACO1	24.0199	24.0054	23.9541	23.412	23.3333	23.3582	P21399	P21399	ACOHC_HUMAN	ACO1	Cytoplasmic aconitate hydratase	P21399	FALSE	0	-0.719374	-0.531196	-0.625285	8.98188e-05	4.67312e-06	-16.4287	TRUE	TRUE	Down	Down
ACO2	22.9319	22.9798	22.904	22.8755	22.8857	22.9312	Q99798	Q99798	ACON_HUMAN	ACO2	Aconitate hydratase, mitochondrial	Q99798	FALSE	0	-0.131659	0.0494686	-0.0410952	0.375754	0.306555	-1.12176	FALSE	FALSE	Stable	Stable
ACOT1	22.7704	22.6962	22.7239	22.883	22.9221	22.9165	Q86TX2	P49753;Q86TX2	ACOT1_HUMAN	ACOT1	Acyl-coenzyme A thioesterase 1	Q86TX2	FALSE	0	0.0904098	0.263645	0.177027	0.00726772	0.00262443	5.05241	FALSE	FALSE	Stable	Stable
ACOT11	18.557	18.4725	18.6249	18.6548	18.8105	18.6527	Q8WXI4	Q8WXI4	ACO11_HUMAN	ACOT11	Acyl-coenzyme A thioesterase 11	Q8WXI4	FALSE	0	-0.00270297	0.311784	0.154541	0.0852287	0.0529044	2.42959	FALSE	FALSE	Stable	Stable
ACOT13	21.039	21.2199	21.2239	21.0144	21.0015	21.0719	Q9NPJ3	Q9NPJ3	ACO13_HUMAN	ACOT13	Acyl-coenzyme A thioesterase 13	Q9NPJ3	FALSE	0	-0.282129	0.0188788	-0.131625	0.115273	0.0757845	-2.162	FALSE	FALSE	Stable	Stable
ACOT7	25.9686	25.9905	25.9936	26.5598	26.587	26.608	O00154	O00154	BACH_HUMAN	ACOT7	Cytosolic acyl coenzyme A thioester hydrolase	O00154	FALSE	0	0.52344	0.677914	0.600677	5.17078e-05	1.91707e-06	19.2256	TRUE	TRUE	Up	Up
ACOT8	21.6046	21.8633	21.6117	22.0498	21.8874	21.9583	O14734	O14734	ACOT8_HUMAN	ACOT8	Acyl-coenzyme A thioesterase 8	O14734	FALSE	0	0.0598939	0.484073	0.271984	0.0380146	0.0204295	3.1702	FALSE	FALSE	Stable	Stable
ACOT9	23.1792	23.0873	23.1335	23.0023	22.8705	23.0078	Q9Y305	Q9Y305	ACOT9_HUMAN	ACOT9	Acyl-coenzyme A thioesterase 9, mitochondrial	Q9Y305	FALSE	0	-0.301291	-0.0449793	-0.173135	0.0320419	0.0166131	-3.33973	FALSE	FALSE	Stable	Stable
ACOX1	21.798	21.6755	21.7483	21.5761	21.5582	21.532	Q15067	Q15067	ACOX1_HUMAN	ACOX1	Peroxisomal acyl-coenzyme A oxidase 1	Q15067	FALSE	0	-0.289744	-0.0805859	-0.185165	0.0125013	0.00516151	-4.37701	FALSE	FALSE	Stable	Stable
ACOX3	22.3348	22.0283	21.888	21.8423	21.6847	21.9137	O15254	O15254	ACOX3_HUMAN	ACOX3	Peroxisomal acyl-coenzyme A oxidase 3	O15254	FALSE	0	-0.583518	0.0432057	-0.270156	0.119351	0.079008	-2.13124	FALSE	FALSE	Stable	Stable
ACP1	24.2207	24.2485	24.3025	24.1584	24.3306	24.329	P24666	P24666	PPAC_HUMAN	ACP1	Low molecular weight phosphotyrosine protein phosphatase	P24666	FALSE	0	-0.130053	0.160982	0.0154645	0.838637	0.801916	0.262716	FALSE	FALSE	Stable	Stable
ACP2	22.5436	22.5676	22.4909	22.0974	21.9029	22.0126	P11117	P11117	PPAL_HUMAN	ACP2	Lysosomal acid phosphatase	P11117	FALSE	0	-0.672965	-0.386509	-0.529737	0.000730436	0.000121724	-9.14316	TRUE	TRUE	Down	Down
ACP6	19.2554	19.251	19.4388	19.6933	19.5736	19.6225	Q9NPH0	Q9NPH0	PPA6_HUMAN	ACP6	Lysophosphatidic acid phosphatase type 6	Q9NPH0	FALSE	0	0.152702	0.476769	0.314736	0.00884118	0.0033486	4.8018	FALSE	FALSE	Stable	Stable
ACSF2	23.1343	23.0755	23.1308	22.9557	22.8844	22.9565	Q96CM8	Q96CM8	ACSF2_HUMAN	ACSF2	Medium-chain acyl-CoA ligase ACSF2, mitochondrial	Q96CM8	FALSE	0	-0.275397	-0.0872923	-0.181345	0.0090874	0.00346789	-4.7665	FALSE	FALSE	Stable	Stable
ACSF3	18.6031	18.5873	18.7839	19.0259	19.1774	19.1145	Q4G176	Q4G176	ACSF3_HUMAN	ACSF3	Malonate--CoA ligase ACSF3, mitochondrial	Q4G176	FALSE	0	0.27471	0.620967	0.447839	0.0028933	0.000809677	6.39465	FALSE	FALSE	Stable	Stable
ACSL1	21.1784	21.0861	21.0752	21.5493	21.5248	21.5288	P33121	P33121	ACSL1_HUMAN	ACSL1	Long-chain-fatty-acid--CoA ligase 1	P33121	FALSE	0	0.322759	0.519434	0.421096	0.000425919	5.45769e-05	10.5859	FALSE	FALSE	Stable	Stable
ACSL3	24.0659	24.0415	24.0417	23.7702	23.7824	23.7528	O95573	O95573	ACSL3_HUMAN	ACSL3	Fatty acid CoA ligase Acsl3	O95573	FALSE	0	-0.355165	-0.207252	-0.281209	0.000658855	0.000104704	-9.39973	FALSE	FALSE	Stable	Stable
ACSL4	23.9932	23.9448	23.9638	23.6906	23.759	23.6524	O60488	O60488	ACSL4_HUMAN	ACSL4	Long-chain-fatty-acid--CoA ligase 4	O60488	FALSE	0	-0.36578	-0.167361	-0.266571	0.00249544	0.000665558	-6.64238	FALSE	FALSE	Stable	Stable
ACSL5	17.6541	16.4591	15.9514	19.449	19.3017	19.2868	Q9ULC5	Q9ULC5	ACSL5_HUMAN	ACSL5	Long-chain-fatty-acid--CoA ligase 5	Q9ULC5	TRUE	2	1.60995	3.70534	2.65764	0.00312771	0.000895012	6.27085	TRUE	TRUE	Up	Up
ACSM3	17.7156	18.408	17.8432	18.3015	18.4993	18.5076	Q53FZ2	Q53FZ2	ACSM3_HUMAN	ACSM3	Acyl-coenzyme A synthetase ACSM3, mitochondrial	Q53FZ2	FALSE	0	-0.0178454	0.912236	0.447195	0.0904925	0.0567312	2.37723	FALSE	FALSE	Stable	Stable
ACSS2	19.2281	19.1029	19.296	19.5491	19.6002	19.3935	Q9NR19	Q9NR19	ACSA_HUMAN	ACSS2	Acetyl-coenzyme A synthetase, cytoplasmic	Q9NR19	FALSE	0	0.118517	0.492018	0.305268	0.0166447	0.00740382	4.04095	FALSE	FALSE	Stable	Stable
ACTBL2	22.173	21.969	21.911	23.1408	22.251	22.8113	Q562R1	Q562R1	ACTBL_HUMAN	ACTBL2	Beta-actin-like protein 2	Q562R1	FALSE	0	0.15271	1.2807	0.716703	0.0390892	0.0211681	3.14145	FALSE	FALSE	Stable	Stable
ACTG1	31.8088	31.8193	31.7492	31.727	31.845	31.8061	P63261	P60709;P63261;Cont_P60712	ACTG_HUMAN	ACTG1	Actin, cytoplasmic 2	P63261	FALSE	0	-0.10938	0.109891	0.000255113	0.99676	0.995604	0.00575233	FALSE	FALSE	Stable	Stable
ACTL6A	23.2864	23.4487	23.4377	24.0089	23.9382	24.0358	O96019	O96019	ACL6A_HUMAN	ACTL6A	Actin-like protein 6A	O96019	FALSE	0	0.461575	0.745163	0.603369	0.000435065	5.65057e-05	10.5194	TRUE	TRUE	Up	Up
ACTN1	26.9109	26.87	26.8867	26.7733	26.7187	26.767	P12814	P12814	ACTN1_HUMAN	ACTN1	Alpha-actinin-1	P12814	FALSE	0	-0.218301	-0.0541452	-0.136223	0.0157631	0.00691889	-4.10288	FALSE	FALSE	Stable	Stable
ACTN4	27.6706	27.6915	27.6842	27.691	27.721	27.6919	O43707	O43707	ACTN4_HUMAN	ACTN4	Alpha-actinin-4	O43707	FALSE	0	-0.0546142	0.0929819	0.0191838	0.609387	0.545191	0.642621	FALSE	FALSE	Stable	Stable
ACTR10	22.4683	22.5665	22.4646	22.3648	22.4556	22.3701	Q9NZ32	Q9NZ32	ARP10_HUMAN	ACTR10	Actin-related protein 10	Q9NZ32	FALSE	0	-0.218207	0.0122593	-0.102974	0.10934	0.0711097	-2.20909	FALSE	FALSE	Stable	Stable
ACTR1A	23.8657	23.8803	23.8152	23.847	23.8649	23.9073	P61163	P61163	ACTZ_HUMAN	ACTR1A	Alpha-centractin	P61163	FALSE	0	-0.0694242	0.10815	0.019363	0.668167	0.609999	0.53912	FALSE	FALSE	Stable	Stable
ACTR1B	20.5914	20.7677	20.6695	20.3037	20.3932	20.3028	P42025	P42025	ACTY_HUMAN	ACTR1B	Beta-centractin	P42025	FALSE	0	-0.483422	-0.202499	-0.34296	0.00361975	0.00108706	-6.03601	FALSE	FALSE	Stable	Stable
ACTR2	26.4776	26.5068	26.555	26.2817	26.166	26.2424	P61160	P61160	ARP2_HUMAN	ACTR2	Actin-related protein 2	P61160	FALSE	0	-0.392402	-0.173882	-0.283142	0.00287579	0.000802149	-6.40629	FALSE	FALSE	Stable	Stable
ACTR3	25.4997	25.4389	25.4566	25.1128	25.1538	25.1623	P61158	P61158	ARP3_HUMAN	ACTR3	Actin-related protein 3	P61158	FALSE	0	-0.407249	-0.236981	-0.322115	0.00066855	0.000107557	-9.35347	FALSE	FALSE	Stable	Stable
ACTR5	19.7947	19.7557	20.1208	20.047	19.9013	19.9395	Q9H9F9	Q9H9F9	ARP5_HUMAN	ACTR5	Actin-related protein 5	Q9H9F9	FALSE	0	-0.192066	0.336536	0.0722354	0.591245	0.525458	0.67564	FALSE	FALSE	Stable	Stable
ACTR6	19.4206	19.2427	19.3699	19.1387	19.1905	19.2019	Q9GZN1	Q9GZN1	ARP6_HUMAN	ACTR6	Actin-related protein 6	Q9GZN1	FALSE	0	-0.302955	-0.031851	-0.167403	0.0427917	0.0236305	-3.05296	FALSE	FALSE	Stable	Stable
ACTR8	19.9443	19.888	19.8407	19.8746	19.8602	19.9776	Q9H981	Q9H981	ARP8_HUMAN	ACTR8	Actin-related protein 8	Q9H981	FALSE	0	-0.107216	0.133456	0.0131201	0.834649	0.79692	0.269529	FALSE	FALSE	Stable	Stable
ACVR1	19.0866	18.9154	18.7897	18.5671	18.4174	18.5811	Q04771	Q04771	ACVR1_HUMAN	ACVR1	Activin receptor type-1	Q04771	FALSE	0	-0.627696	-0.189734	-0.408715	0.0102767	0.00404188	-4.61401	FALSE	FALSE	Stable	Stable
ACY1	20.086	20.0987	19.9263	19.363	19.3639	19.2901	Q03154	Q03154	ACY1_HUMAN	ACY1	Aminoacylase-1	Q03154	FALSE	0	-0.841065	-0.554824	-0.697944	0.000261716	2.65592e-05	-12.0554	TRUE	TRUE	Down	Down
ACYP1	23.1085	23.2268	23.1936	23.207	23.31	23.3102	P07311	P07311	ACYP1_HUMAN	ACYP1	Acylphosphatase-1	P07311	FALSE	0	-0.0237052	0.222588	0.0994416	0.139483	0.094917	1.99622	FALSE	FALSE	Stable	Stable
ACYP2	19.6397	19.7013	19.6842	19.6178	19.5127	19.5424	P14621	P14621	ACYP2_HUMAN	ACYP2	Acylphosphatase-2	P14621	FALSE	0	-0.219727	-0.0151389	-0.117433	0.054108	0.0310224	-2.83794	FALSE	FALSE	Stable	Stable
ADA	21.7182	21.7681	21.672	20.0356	20.0484	20.0243	P00813	P00813	ADA_HUMAN	ADA	Adenosine deaminase	P00813	FALSE	0	-1.77468	-1.59189	-1.68328	3.57826e-06	1.38246e-08	-45.5303	TRUE	TRUE	Down	Down
ADAL	19.1355	18.8838	19.1465	18.8675	18.8674	18.9187	Q6DHV7	Q6DHV7	ADAL_HUMAN	ADAL	Adenosine deaminase-like protein	Q6DHV7	FALSE	0	-0.363949	0.022586	-0.170682	0.112588	0.0736424	-2.18319	FALSE	FALSE	Stable	Stable
ADAM10	21.4497	21.4121	21.3653	21.3539	21.2937	21.2531	O14672	O14672	ADA10_HUMAN	ADAM10	Disintegrin and metalloproteinase domain-containing protein 10	O14672	FALSE	0	-0.213955	-0.00370549	-0.10883	0.0738403	0.0445609	-2.55923	FALSE	FALSE	Stable	Stable
ADAM12	18.7684	18.9506	18.9205	17.1186	16.037	16.6983	O43184	O43184	ADA12_HUMAN	ADAM12	Disintegrin and metalloproteinase domain-containing protein 12	O43184	TRUE	1	-2.92455	-1.59915	-2.26185	0.000972284	0.000187946	-8.4375	TRUE	TRUE	Down	Down
ADAM15	20.3734	20.6119	20.473	20.403	20.5152	20.4693	Q13444	Q13444	ADA15_HUMAN	ADAM15	Disintegrin and metalloproteinase domain-containing protein 15	Q13444	FALSE	0	-0.195906	0.148669	-0.0236186	0.790695	0.746705	-0.338895	FALSE	FALSE	Stable	Stable
ADAM17	20.6617	20.6951	20.6497	20.6552	20.6293	20.5884	P78536	P78536	ADA17_HUMAN	ADAM17	Disintegrin and metalloproteinase domain-containing protein 17	P78536	FALSE	0	-0.129751	0.0406973	-0.044527	0.311208	0.24592	-1.29159	FALSE	FALSE	Stable	Stable
ADAM9	23.649	23.7122	23.6412	23.7378	23.7826	23.7525	Q13443	Q13443	ADAM9_HUMAN	ADAM9	Disintegrin and metalloproteinase domain-containing protein 9	Q13443	FALSE	0	0.00206265	0.178243	0.0901527	0.0763365	0.0463131	2.52997	FALSE	FALSE	Stable	Stable
ADAMTS12	15.8371	16.0714	15.8049	15.9195	15.6967	15.9952	P58397	P58397	ATS12_HUMAN	ADAMTS12	A disintegrin and metalloproteinase with thrombospondin motifs 12	P58397	FALSE	0	-0.296467	0.228474	-0.0339968	0.802161	0.760116	-0.3202	FALSE	FALSE	Stable	Stable
ADAMTSL1	16.5626	17.239	17.3176	16.9294	16.8806	16.8291	Q8N6G6	Q8N6G6	ATL1_HUMAN	ADAMTSL1	ADAMTS-like protein 1	Q8N6G6	FALSE	0	-0.662192	0.34222	-0.159986	0.531487	0.462151	-0.787526	FALSE	FALSE	Stable	Stable
ADAMTSL4	20.0185	20.3434	20.1862	18.5624	18.4991	18.4124	Q6UY14	Q6UY14	ATL4_HUMAN	ADAMTSL4	ADAMTS-like protein 4	Q6UY14	FALSE	0	-1.91559	-1.46723	-1.69141	5.79767e-05	2.27726e-06	-18.6515	TRUE	TRUE	Down	Down
ADAR	23.2562	23.3401	23.2909	23.7194	23.7493	23.7548	P55265	P55265	DSRAD_HUMAN	ADAR	Double-stranded RNA-specific adenosine deaminase	P55265	FALSE	0	0.35647	0.534318	0.445394	0.000236078	2.28851e-05	12.382	FALSE	FALSE	Stable	Stable
ADAT1	18.5544	18.6663	18.526	18.8864	18.974	18.9218	Q9BUB4	Q9BUB4	ADAT1_HUMAN	ADAT1	tRNA-specific adenosine deaminase 1	Q9BUB4	FALSE	0	0.221052	0.469332	0.345192	0.00217228	0.000556987	6.87407	FALSE	FALSE	Stable	Stable
ADAT2	17.5062	17.3391	17.561	17.6029	17.4913	17.9742	Q7Z6V5	Q7Z6V5	ADAT2_HUMAN	ADAT2	tRNA-specific adenosine deaminase 2	Q7Z6V5	FALSE	0	-0.117316	0.558644	0.220664	0.217212	0.159727	1.614	FALSE	FALSE	Stable	Stable
ADAT3	18.8287	18.7244	18.4423	18.731	18.6888	18.6829	Q96EY9	Q96EY9	ADAT3_HUMAN	ADAT3	Probable inactive tRNA-specific adenosine deaminase-like protein 3	Q96EY9	FALSE	0	-0.214009	0.28554	0.0357654	0.781656	0.735954	0.35398	FALSE	FALSE	Stable	Stable
ADCY3	18.6418	18.8308	18.7479	18.9038	19.1309	18.8756	O60266	O60266	ADCY3_HUMAN	ADCY3	Adenylate cyclase type 3	O60266	FALSE	0	0.017079	0.442715	0.229897	0.0652036	0.0385176	2.67048	FALSE	FALSE	Stable	Stable
ADCY6	19.0669	19.1932	19.2207	18.9532	19.1273	19.0759	O43306	O43306	ADCY6_HUMAN	ADCY6	Adenylate cyclase type 6	O43306	FALSE	0	-0.268492	0.052276	-0.108108	0.204507	0.148778	-1.66633	FALSE	FALSE	Stable	Stable
ADCY7	16.6614	15.927	16.4197	17.5659	17.1417	17.3098	P51828	P51828	ADCY7_HUMAN	ADCY7	Adenylate cyclase type 7	P51828	FALSE	0	0.485708	1.52048	1.00309	0.00890189	0.00337848	4.79283	TRUE	TRUE	Up	Up
ADCY9	19.1202	19.0099	19.1246	18.6169	18.7305	18.7414	O60503	O60503	ADCY9_HUMAN	ADCY9	Adenylate cyclase type 9	O60503	FALSE	0	-0.521255	-0.256077	-0.388666	0.0017734	0.000422509	-7.24656	FALSE	FALSE	Stable	Stable
ADD1	22.735	22.7547	22.7545	22.4227	22.3785	22.4168	P35611	P35611	ADDA_HUMAN	ADD1	Alpha-adducin	P35611	FALSE	0	-0.418747	-0.265462	-0.342105	0.000366118	4.33969e-05	-11.0346	FALSE	FALSE	Stable	Stable
ADD3	21.926	21.899	21.8856	21.408	21.3975	21.431	Q9UEY8	Q9UEY8	ADDG_HUMAN	ADD3	Gamma-adducin	Q9UEY8	FALSE	0	-0.568112	-0.414625	-0.491368	0.000100111	5.76713e-06	-15.8282	FALSE	FALSE	Stable	Stable
ADGB	21.1291	21.3483	21.2649	20.9779	21.1353	21.2073	Q8N7X0	Q8N7X0	ADGB_HUMAN	ADGB	Androglobin	Q8N7X0	FALSE	0	-0.344763	0.0635903	-0.140586	0.196242	0.141704	-1.70216	FALSE	FALSE	Stable	Stable
ADGRA3	15.2099	15.9536	16.048	15.9946	15.8458	15.1588	Q8IWK6	Q8IWK6	AGRA3_HUMAN	ADGRA3	Adhesion G protein-coupled receptor A3	Q8IWK6	TRUE	2	-0.835225	0.693766	-0.0707295	0.858248	0.826998	-0.228712	FALSE	FALSE	Stable	Stable
ADGRE5	21.0179	21.1804	21.2702	21.4501	21.5054	21.3673	P48960	P48960	AGRE5_HUMAN	ADGRE5	Adhesion G protein-coupled receptor E5	P48960	FALSE	0	0.0980694	0.471491	0.28478	0.0211556	0.0100206	3.77055	FALSE	FALSE	Stable	Stable
ADGRG6	20.7161	20.6053	20.6287	20.1242	20.205	20.1947	Q86SQ4	Q86SQ4	AGRG6_HUMAN	ADGRG6	Adhesion G-protein coupled receptor G6	Q86SQ4	FALSE	0	-0.586951	-0.363914	-0.475433	0.000432945	5.59232e-05	-10.5392	FALSE	FALSE	Stable	Stable
ADGRL2	20.6076	20.5873	20.5998	18.5332	18.3658	18.3691	O95490	O95490	AGRL2_HUMAN	ADGRL2	Adhesion G protein-coupled receptor L2	O95490	FALSE	0	-2.30964	-2.04139	-2.17552	5.03509e-06	2.86757e-08	-40.0974	TRUE	TRUE	Down	Down
ADH5	23.6033	23.8622	23.7869	23.6508	23.5293	23.6484	P11766	P11766	ADHX_HUMAN	ADH5	Alcohol dehydrogenase class-3	P11766	FALSE	0	-0.333111	0.0505491	-0.141281	0.171325	0.120578	-1.82067	FALSE	FALSE	Stable	Stable
ADI1	21.9118	21.8573	21.8861	21.7392	21.7669	21.6716	Q9BV57	Q9BV57	MTND_HUMAN	ADI1	Acireductone dioxygenase	Q9BV57	FALSE	0	-0.255754	-0.0625977	-0.159176	0.0161769	0.00713742	-4.07438	FALSE	FALSE	Stable	Stable
ADIRF	21.7724	21.6889	21.5668	22.5041	22.7444	22.5689	Q15847	Q15847	ADIRF_HUMAN	ADIRF	Adipogenesis regulatory factor	Q15847	FALSE	0	0.725119	1.13445	0.929786	0.000341565	3.9369e-05	11.2305	TRUE	TRUE	Up	Up
ADK	21.1798	21.0672	21.2114	21.2745	21.1762	21.3194	P55263	P55263	ADK_HUMAN	ADK	Adenosine kinase	P55263	FALSE	0	-0.0396367	0.247401	0.103882	0.177402	0.125838	1.78935	FALSE	FALSE	Stable	Stable
ADNP	21.5852	21.5818	21.5579	21.5536	21.6221	21.5893	Q9H2P0	Q9H2P0	ADNP_HUMAN	ADNP	Activity-dependent neuroprotector homeobox protein	Q9H2P0	FALSE	0	-0.0694164	0.0961121	0.0133479	0.754113	0.704486	0.398688	FALSE	FALSE	Stable	Stable
ADNP2	19.0495	18.962	19.0241	18.236	18.7185	18.6313	Q6IQ32	Q6IQ32	ADNP2_HUMAN	ADNP2	Activity-dependent neuroprotector homeobox protein 2	Q6IQ32	FALSE	0	-0.801565	-0.164972	-0.483268	0.0214894	0.0102191	-3.75337	FALSE	FALSE	Stable	Stable
ADO	20.7584	21.0095	20.8562	20.9306	21.0909	21.1561	Q96SZ5	Q96SZ5	AEDO_HUMAN	ADO	2-aminoethanethiol dioxygenase	Q96SZ5	FALSE	0	-0.0313896	0.400423	0.184517	0.121925	0.0810214	2.11268	FALSE	FALSE	Stable	Stable
ADORA2B	15.9142	15.4659	15.6433	16.578	15.9857	15.4895	P29275	P29275	AA2BR_HUMAN	ADORA2B	Adenosine receptor A2b	P29275	FALSE	0	-0.361897	1.04841	0.343257	0.34396	0.275966	1.20337	FALSE	FALSE	Stable	Stable
ADPGK	21.5015	21.412	21.4989	21.8278	21.7713	21.7568	Q9BRR6	Q9BRR6	ADPGK_HUMAN	ADPGK	ADP-dependent glucokinase	Q9BRR6	FALSE	0	0.211847	0.417166	0.314507	0.00149365	0.000334701	7.57346	FALSE	FALSE	Stable	Stable
ADPRM	17.4788	17.7486	17.8193	17.9138	18.3999	18.3677	Q3LIE5	Q3LIE5	ADPRM_HUMAN	ADPRM	Manganese-dependent ADP-ribose/CDP-alcohol diphosphatase	Q3LIE5	FALSE	0	0.151012	0.938778	0.544895	0.0296099	0.015089	3.41987	FALSE	FALSE	Stable	Stable
ADPRS	23.3189	23.2976	23.3811	23.6371	23.6155	23.5224	Q9NX46	Q9NX46	ADPRS_HUMAN	ADPRS	ADP-ribosylhydrolase ARH3	Q9NX46	FALSE	0	0.146062	0.372248	0.259155	0.00466902	0.00149601	5.66484	FALSE	FALSE	Stable	Stable
ADRM1	22.8932	22.8803	22.901	22.9764	22.7827	22.9497	Q16186	Q16186	ADRM1_HUMAN	ADRM1	Proteasomal ubiquitin receptor ADRM1	Q16186	FALSE	0	-0.132159	0.155087	0.0114639	0.877594	0.850356	0.197321	FALSE	FALSE	Stable	Stable
ADSL	23.1204	23.174	23.195	22.8763	22.9239	23.0349	P30566	P30566	PUR8_HUMAN	ADSL	Adenylosuccinate lyase	P30566	FALSE	0	-0.345995	-0.0902887	-0.218142	0.0142632	0.00611044	-4.21786	FALSE	FALSE	Stable	Stable
ADSS2	23.9997	23.9381	23.9478	23.7465	23.5972	23.6762	P30520	P30520	PURA2_HUMAN	ADSS2	Adenylosuccinate synthetase isozyme 2	P30520	FALSE	0	-0.408299	-0.1689	-0.2886	0.00381276	0.0011588	-5.96029	FALSE	FALSE	Stable	Stable
AEBP2	18.8692	19.1216	18.8529	18.675	18.8801	18.5068	Q6ZN18	Q6ZN18	AEBP2_HUMAN	AEBP2	Zinc finger protein AEBP2	Q6ZN18	FALSE	0	-0.554621	0.0334488	-0.260586	0.111733	0.072882	-2.19087	FALSE	FALSE	Stable	Stable
AFAP1	22.4506	22.3788	22.418	22.0607	21.8922	21.9448	Q8N556	Q8N556	AFAP1_HUMAN	AFAP1	Actin filament-associated protein 1	Q8N556	FALSE	0	-0.581122	-0.318716	-0.449919	0.000953717	0.00018325	-8.47725	FALSE	FALSE	Stable	Stable
AFDN	22.2659	22.297	22.2486	22.208	22.247	22.2418	P55196	P55196	AFAD_HUMAN	AFDN	Afadin	P55196	FALSE	0	-0.117946	0.041547	-0.0381993	0.351613	0.282921	-1.18416	FALSE	FALSE	Stable	Stable
AFF1	18.7801	18.9691	18.8057	18.7889	18.8842	18.8967	P51825	P51825	AFF1_HUMAN	AFF1	AF4/FMR2 family member 1	P51825	FALSE	0	-0.1521	0.162103	0.00500144	0.95108	0.939934	0.0787008	FALSE	FALSE	Stable	Stable
AFF4	21.4355	21.3897	21.5852	21.6927	21.7904	21.7186	Q9UHB7	Q9UHB7	AFF4_HUMAN	AFF4	AF4/FMR2 family member 4	Q9UHB7	FALSE	0	0.111119	0.416448	0.263784	0.0136403	0.00577054	4.27144	FALSE	FALSE	Stable	Stable
AFG3L2	22.7521	22.7836	22.776	22.8775	22.8982	22.916	Q9Y4W6	Q9Y4W6	AFG32_HUMAN	AFG3L2	AFG3-like protein 2	Q9Y4W6	FALSE	0	0.0506079	0.20269	0.126649	0.0155959	0.0068108	4.11735	FALSE	FALSE	Stable	Stable
AFTPH	20.3699	20.6008	20.5314	20.318	20.3697	20.4056	Q6ULP2	Q6ULP2	AFTIN_HUMAN	AFTPH	Aftiphilin	Q6ULP2	FALSE	0	-0.301997	0.0294642	-0.136266	0.133608	0.0903337	-2.03259	FALSE	FALSE	Stable	Stable
AGA	19.4727	19.6327	19.5478	19.745	19.8746	19.7831	P20933	P20933	ASPG_HUMAN	AGA	N(4)-(beta-N-acetylglucosaminyl)-L-asparaginase	P20933	FALSE	0	0.107679	0.392071	0.249875	0.0128454	0.0053433	4.34408	FALSE	FALSE	Stable	Stable
AGAP1	18.6412	18.8122	18.9176	17.9359	18.85	18.3965	Q9UPQ3	Q9UPQ3	AGAP1_HUMAN	AGAP1	Arf-GAP with GTPase, ANK repeat and PH domain-containing protein 1	Q9UPQ3	FALSE	0	-0.968917	0.176533	-0.396192	0.194479	0.14018	-1.71011	FALSE	FALSE	Stable	Stable
AGAP3	20.4277	20.4838	20.5049	20.6494	20.7907	20.8063	Q96P47	Q96P47	AGAP3_HUMAN	AGAP3	Arf-GAP with GTPase, ANK repeat and PH domain-containing protein 3	Q96P47	FALSE	0	0.143586	0.409715	0.276651	0.00680126	0.0024156	5.13966	FALSE	FALSE	Stable	Stable
AGFG1	22.6797	22.5595	22.5638	22.0946	22.186	22.2287	P52594	P52594	AGFG1_HUMAN	AGFG1	Arf-GAP domain and FG repeat-containing protein 1	P52594	FALSE	0	-0.565755	-0.296691	-0.431223	0.00123623	0.000263143	-7.92392	FALSE	FALSE	Stable	Stable
AGFG2	20.7881	20.8162	20.8084	21.6579	21.627	21.6074	O95081	O95081	AGFG2_HUMAN	AGFG2	Arf-GAP domain and FG repeat-containing protein 2	O95081	FALSE	0	0.748466	0.904553	0.826509	1.92569e-05	3.29835e-07	26.1802	TRUE	TRUE	Up	Up
AGGF1	18.6252	18.6676	18.8223	18.9501	18.9343	18.5891	Q8N302	Q8N302	AGGF1_HUMAN	AGGF1	Angiogenic factor with G patch and FHA domains 1	Q8N302	FALSE	0	-0.161676	0.400521	0.119422	0.405384	0.335674	1.05025	FALSE	FALSE	Stable	Stable
AGK	22.5274	22.5588	22.4486	22.5482	22.6338	22.493	Q53H12	Q53H12	AGK_HUMAN	AGK	Acylglycerol kinase, mitochondrial	Q53H12	FALSE	0	-0.0819491	0.175441	0.0467458	0.476533	0.405201	0.897935	FALSE	FALSE	Stable	Stable
AGL	20.7905	20.8498	20.8205	20.7416	20.7482	20.8131	P35573	P35573	GDE_HUMAN	AGL	Glycogen debranching enzyme	P35573	FALSE	0	-0.143903	0.0386568	-0.0526233	0.268464	0.205989	-1.42517	FALSE	FALSE	Stable	Stable
AGMAT	17.6994	16.1314	18.7689	19.3809	19.5273	19.6148	Q9BSE5	Q9BSE5	SPEB_HUMAN	AGMAT	Agmatinase, mitochondrial	Q9BSE5	TRUE	1	0.38851	3.56028	1.97439	0.0417826	0.0229118	3.0777	FALSE	FALSE	Stable	Stable
AGO1	21.3321	21.3705	21.3517	21.2823	21.2941	21.2848	Q9UL18	Q9UL18	AGO1_HUMAN	AGO1	Protein argonaute-1	Q9UL18	FALSE	0	-0.138256	0.00942562	-0.0644152	0.115788	0.0763472	-2.15653	FALSE	FALSE	Stable	Stable
AGO2	21.8304	21.8523	21.8152	21.6731	21.6596	21.6289	Q9UKV8	Q9UKV8	AGO2_HUMAN	AGO2	Protein argonaute-2	Q9UKV8	FALSE	0	-0.256841	-0.100726	-0.178783	0.00467475	0.00149965	-5.66208	FALSE	FALSE	Stable	Stable
AGO3	20.5046	21.1269	20.9925	20.7494	20.7924	20.751	Q9H9G7	Q9H9G7;Q9HCK5	AGO3_HUMAN	AGO3	Protein argonaute-3	Q9H9G7	FALSE	0	-0.507195	0.2864	-0.110398	0.584704	0.518316	-0.687789	FALSE	FALSE	Stable	Stable
AGPAT1	22.4793	22.3898	22.3789	21.8031	21.8336	22.0641	Q99943	Q99943	PLCA_HUMAN	AGPAT1	1-acyl-sn-glycerol-3-phosphate acyltransferase alpha	Q99943	FALSE	0	-0.710634	-0.320832	-0.515733	0.00265608	0.000720373	-6.54145	TRUE	TRUE	Down	Down
AGPAT2	22.6782	22.5642	22.5052	22.8122	22.6442	22.5798	O15120	O15120	PLCB_HUMAN	AGPAT2	1-acyl-sn-glycerol-3-phosphate acyltransferase beta	O15120	FALSE	0	-0.0939605	0.28646	0.0962498	0.326025	0.259392	1.25092	FALSE	FALSE	Stable	Stable
AGPAT3	21.0343	21.1134	21.0723	21.0251	21.0978	21.062	Q9NRZ7	Q9NRZ7	PLCC_HUMAN	AGPAT3	1-acyl-sn-glycerol-3-phosphate acyltransferase gamma	Q9NRZ7	FALSE	0	-0.106414	0.0829228	-0.0117454	0.810563	0.769852	-0.306709	FALSE	FALSE	Stable	Stable
AGPAT4	17.757	18.2522	18.1755	18.3595	18.2825	18.0632	Q9NRZ5	Q9NRZ5	PLCD_HUMAN	AGPAT4	1-acyl-sn-glycerol-3-phosphate acyltransferase delta	Q9NRZ5	FALSE	0	-0.199121	0.546182	0.173531	0.364501	0.295216	1.15116	FALSE	FALSE	Stable	Stable
AGPAT5	20.6605	20.5863	20.6568	20.7634	20.9099	20.8769	Q9NUQ2	Q9NUQ2	PLCE_HUMAN	AGPAT5	1-acyl-sn-glycerol-3-phosphate acyltransferase epsilon	Q9NUQ2	FALSE	0	0.0902217	0.340863	0.215542	0.0138712	0.00589249	4.25181	FALSE	FALSE	Stable	Stable
AGPS	22.9382	22.9556	22.9546	22.4501	22.4668	22.4074	O00116	O00116	ADAS_HUMAN	AGPS	Alkyldihydroxyacetonephosphate synthase, peroxisomal	O00116	FALSE	0	-0.587631	-0.42841	-0.50802	0.000100943	5.87725e-06	-15.7752	TRUE	TRUE	Down	Down
AGRN	22.163	22.2388	22.2185	20.984	20.9035	20.9538	O00468	O00468	AGRIN_HUMAN	AGRN	Agrin	O00468	FALSE	0	-1.35658	-1.16276	-1.25967	1.02957e-05	1.02096e-07	-32.1334	TRUE	TRUE	Down	Down
AGTPBP1	18.6226	18.6927	18.7167	18.3358	18.3853	18.4714	Q9UPW5	Q9UPW5	CBPC1_HUMAN	AGTPBP1	Cytosolic carboxypeptidase 1	Q9UPW5	FALSE	0	-0.401999	-0.157602	-0.279801	0.00467654	0.00150186	-5.66041	FALSE	FALSE	Stable	Stable
AHCTF1	21.6652	21.771	21.6814	21.7884	21.8733	21.865	Q8WYP5	Q8WYP5	ELYS_HUMAN	AHCTF1	Protein ELYS	Q8WYP5	FALSE	0	0.0242668	0.24842	0.136343	0.0449224	0.0250212	3.00735	FALSE	FALSE	Stable	Stable
AHCY	25.6186	25.5891	25.6107	25.8454	25.8638	25.8446	P23526	P23526	SAHH_HUMAN	AHCY	Adenosylhomocysteinase	P23526	FALSE	0	0.171841	0.318421	0.245131	0.00105209	0.000209562	8.26831	FALSE	FALSE	Stable	Stable
AHCYL1	22.5057	22.468	22.4943	22.3348	22.3476	22.3342	O43865	O43865	SAHH2_HUMAN	AHCYL1	S-adenosylhomocysteine hydrolase-like protein 1	O43865	FALSE	0	-0.224578	-0.0764354	-0.150507	0.0074298	0.00269922	-5.02307	FALSE	FALSE	Stable	Stable
AHCYL2	16.9121	16.4734	15.8965	17.4096	17.8154	17.9159	Q96HN2	Q96HN2	SAHH3_HUMAN	AHCYL2	Adenosylhomocysteinase 3	Q96HN2	TRUE	2	0.59801	1.97461	1.28631	0.0102227	0.00401784	4.61989	FALSE	FALSE	Up	Stable
AHDC1	20.0821	20.1264	20.076	19.8157	19.9198	20.0017	Q5TGY3	Q5TGY3	AHDC1_HUMAN	AHDC1	Transcription factor Gibbin	Q5TGY3	FALSE	0	-0.317536	-0.0473874	-0.182462	0.0320482	0.0166205	-3.33936	FALSE	FALSE	Stable	Stable
AHNAK	27.2577	27.3049	27.3166	27.054	27.2308	27.1755	Q09666	Q09666	AHNK_HUMAN	AHNAK	Neuroblast differentiation-associated protein AHNAK	Q09666	FALSE	0	-0.273177	-0.00611936	-0.139648	0.07167	0.0430543	-2.58538	FALSE	FALSE	Stable	Stable
AHNAK2	21.4998	21.6187	21.605	20.9687	21.0612	20.9934	Q8IVF2	Q8IVF2	AHNK2_HUMAN	AHNAK2	Protein AHNAK2	Q8IVF2	FALSE	0	-0.685522	-0.447966	-0.566744	0.000282892	2.99833e-05	-11.7955	TRUE	TRUE	Down	Down
AHR	19.2165	19.5199	19.3077	18.5536	18.6238	18.646	P35869	P35869	AHR_HUMAN	AHR	Aryl hydrocarbon receptor	P35869	FALSE	0	-0.946286	-0.534126	-0.740206	0.000812233	0.000142677	-8.87935	TRUE	TRUE	Down	Down
AHSA1	23.5994	23.6567	23.6441	23.9539	23.8978	23.9354	O95433	O95433	AHSA1_HUMAN	AHSA1	Activator of 90 kDa heat shock protein ATPase homolog 1	O95433	FALSE	0	0.210125	0.381178	0.295651	0.000926491	0.000175484	8.54566	FALSE	FALSE	Stable	Stable
AIDA	21.0025	21.0299	21.1291	20.9474	20.9475	20.9192	Q96BJ3	Q96BJ3	AIDA_HUMAN	AIDA	Axin interactor, dorsalization-associated protein	Q96BJ3	FALSE	0	-0.223162	-0.00846607	-0.115814	0.0654384	0.03869	-2.66705	FALSE	FALSE	Stable	Stable
AIFM1	22.8157	22.9222	22.9073	22.9829	22.9822	22.9455	O95831	O95831	AIFM1_HUMAN	AIFM1	Apoptosis-inducing factor 1, mitochondrial	O95831	FALSE	0	-0.0127357	0.189563	0.0884136	0.115387	0.0759044	2.16083	FALSE	FALSE	Stable	Stable
AIFM2	20.1099	20.0499	20.3903	20.8358	20.8275	20.798	Q9BRQ8	Q9BRQ8	FSP1_HUMAN	AIFM2	Ferroptosis suppressor protein 1	Q9BRQ8	FALSE	0	0.408688	0.865434	0.637061	0.00214614	0.000547797	6.89604	TRUE	TRUE	Up	Up
AIMP1	23.7707	23.8183	23.7199	23.9332	23.9895	24.0932	Q12904	Q12904	AIMP1_HUMAN	AIMP1	Aminoacyl tRNA synthase complex-interacting multifunctional protein 1	Q12904	FALSE	0	0.102914	0.36841	0.235662	0.0123865	0.00509924	4.3886	FALSE	FALSE	Stable	Stable
AIMP2	24.1637	24.0386	24.1899	24.2301	24.1319	24.228	Q13155	Q13155	AIMP2_HUMAN	AIMP2	Aminoacyl tRNA synthase complex-interacting multifunctional protein 2	Q13155	FALSE	0	-0.0704232	0.202256	0.0659166	0.347295	0.278909	1.19519	FALSE	FALSE	Stable	Stable
AIP	23.9901	23.9656	23.9607	23.1524	23.2477	23.2352	O00170	O00170	AIP_HUMAN	AIP	AH receptor-interacting protein	O00170	FALSE	0	-0.855352	-0.665348	-0.76035	4.71305e-05	1.62856e-06	-19.7854	TRUE	TRUE	Down	Down
AJUBA	20.982	21.3399	21.1459	20.2476	20.3257	20.3835	Q96IF1	Q96IF1	AJUBA_HUMAN	AJUBA	LIM domain-containing protein ajuba	Q96IF1	FALSE	0	-1.07548	-0.598538	-0.837009	0.000881435	0.000161644	-8.67678	TRUE	TRUE	Down	Down
AK1	24.6812	24.6125	24.5786	24.6027	24.6275	24.635	P00568	P00568	KAD1_HUMAN	AK1	Adenylate kinase isoenzyme 1	P00568	FALSE	0	-0.0979978	0.0933182	-0.00233981	0.961879	0.953827	-0.0604677	FALSE	FALSE	Stable	Stable
AK2	24.1777	24.2267	24.1868	24.3257	24.3656	24.4189	P54819	P54819	KAD2_HUMAN	AK2	Adenylate kinase 2, mitochondrial	P54819	FALSE	0	0.0785022	0.267455	0.172979	0.0110595	0.00442107	4.52619	FALSE	FALSE	Stable	Stable
AK3	23.1257	23.0831	23.1604	22.718	22.7718	22.7154	Q9UIJ7	Q9UIJ7	KAD3_HUMAN	AK3	GTP:AMP phosphotransferase AK3, mitochondrial	Q9UIJ7	FALSE	0	-0.47979	-0.296143	-0.387966	0.000448649	5.87605e-05	-10.4449	FALSE	FALSE	Stable	Stable
AK4	22.1461	21.9877	22.0317	22.8325	22.8348	22.7918	P27144	P27144	KAD4_HUMAN	AK4	Adenylate kinase 4, mitochondrial	P27144	FALSE	0	0.641437	0.887679	0.764558	0.000111146	6.85377e-06	15.3512	TRUE	TRUE	Up	Up
AK6	21.4043	21.4257	21.34	21.7726	21.6715	21.775	Q9Y3D8	Q9Y3D8	KAD6_HUMAN	AK6	Adenylate kinase isoenzyme 6	Q9Y3D8	FALSE	0	0.23735	0.462114	0.349732	0.00139777	0.000307995	7.6931	FALSE	FALSE	Stable	Stable
AKAP1	20.2482	20.2633	20.243	20.8737	20.6568	20.7831	Q92667	Q92667	AKAP1_HUMAN	AKAP1	A-kinase anchor protein 1, mitochondrial	Q92667	FALSE	0	0.371987	0.667496	0.519742	0.000876171	0.000159741	8.69582	TRUE	TRUE	Up	Up
AKAP10	20.7166	20.894	20.9156	20.9941	21.0078	20.9114	O43572	O43572	AKA10_HUMAN	AKAP10	A-kinase anchor protein 10, mitochondrial	O43572	FALSE	0	-0.0309719	0.289063	0.129045	0.139902	0.0952557	1.99361	FALSE	FALSE	Stable	Stable
AKAP11	19.9585	19.9388	19.8936	20.189	20.2112	20.2238	Q9UKA4	Q9UKA4	AKA11_HUMAN	AKAP11	A-kinase anchor protein 11	Q9UKA4	FALSE	0	0.194766	0.360689	0.277728	0.00105022	0.000208556	8.27573	FALSE	FALSE	Stable	Stable
AKAP12	23.3927	23.5285	23.5165	22.5301	22.6328	22.5986	Q02952	Q02952	AKA12_HUMAN	AKAP12	A-kinase anchor protein 12	Q02952	FALSE	0	-1.02144	-0.762702	-0.89207	7.916e-05	3.79234e-06	-17.0466	TRUE	TRUE	Down	Down
AKAP13	20.9339	21.0043	20.9672	20.262	20.3031	20.2633	Q12802	Q12802	AKP13_HUMAN	AKAP13	A-kinase anchor protein 13	Q12802	FALSE	0	-0.778347	-0.606267	-0.692307	4.64703e-05	1.57993e-06	-19.8912	TRUE	TRUE	Down	Down
AKAP17A	19.9423	19.93	19.9784	20.6189	20.5941	20.5421	Q02040	Q02040	AK17A_HUMAN	AKAP17A	A-kinase anchor protein 17A	Q02040	FALSE	0	0.545604	0.723924	0.634764	7.04187e-05	3.16499e-06	17.5997	TRUE	TRUE	Up	Up
AKAP2	22.7292	22.8153	22.7956	22.8372	22.925	22.9338	Q9Y2D5	Q9Y2D5	AKAP2_HUMAN	AKAP2	A-kinase anchor protein 2	Q9Y2D5	FALSE	0	0.0100434	0.227255	0.118649	0.0631853	0.0370324	2.7007	FALSE	FALSE	Stable	Stable
AKAP5	17.3256	17.6363	17.6715	16.6367	15.9207	16.8004	P24588	P24588	AKAP5_HUMAN	AKAP5	A-kinase anchor protein 5	P24588	FALSE	0	-1.69677	-0.486932	-1.09185	0.0116593	0.00472376	-4.46201	FALSE	FALSE	Down	Stable
AKAP8	20.4271	20.5059	20.401	20.6083	20.345	20.4791	O43823	O43823	AKAP8_HUMAN	AKAP8	A-kinase anchor protein 8	O43823	FALSE	0	-0.150575	0.216144	0.0327847	0.727334	0.674599	0.442008	FALSE	FALSE	Stable	Stable
AKAP8L	20.3962	20.4982	20.4316	20.8539	20.8976	20.8645	Q9ULX6	Q9ULX6	AKP8L_HUMAN	AKAP8L	A-kinase anchor protein 8-like	Q9ULX6	FALSE	0	0.333029	0.526973	0.430001	0.000372214	4.50109e-05	10.9619	FALSE	FALSE	Stable	Stable
AKAP9	21.8001	21.8077	21.7454	21.6701	21.6933	21.6604	Q99996	Q99996	AKAP9_HUMAN	AKAP9	A-kinase anchor protein 9	Q99996	FALSE	0	-0.193013	-0.026672	-0.109842	0.0345783	0.0181918	-3.26486	FALSE	FALSE	Stable	Stable
AKR1A1	25.7247	25.7676	25.799	25.4276	25.302	25.2614	P14550	P14550	AK1A1_HUMAN	AKR1A1	Aldo-keto reductase family 1 member A1	P14550	FALSE	0	-0.565594	-0.301267	-0.433431	0.0011394	0.00023287	-8.10722	FALSE	FALSE	Stable	Stable
AKR1B1	25.893	25.8711	25.809	25.9299	25.794	25.7833	P15121	P15121	ALDR_HUMAN	AKR1B1	Aldo-keto reductase family 1 member B1	P15121	FALSE	0	-0.152448	0.108508	-0.0219698	0.743319	0.692296	-0.416249	FALSE	FALSE	Stable	Stable
AKR1B10	20.2202	20.3926	20.5107	20.5785	20.2963	20.4212	C9JRZ8;O60218	C9JRZ8;O60218	AK1BA_HUMAN;AK1BF_HUMAN	AKR1B10;AKR1B15	Aldo-keto reductase family 1 member B15	C9JRZ8	FALSE	0	-0.194196	0.309258	0.057531	0.6533	0.593397	0.564983	FALSE	FALSE	Stable	Stable
AKR1C3	20.9875	20.9626	20.9288	22.3411	21.991	22.0916	P42330	P42330;Q04828	AK1C3_HUMAN	AKR1C3	Aldo-keto reductase family 1 member C3	P42330	FALSE	0	0.953369	1.40976	1.18157	0.000210604	1.90127e-05	12.8001	TRUE	TRUE	Up	Up
AKR7A2	22.6759	22.6329	22.6326	22.8322	22.875	22.9218	O43488	O43488	ARK72_HUMAN	AKR7A2	Aflatoxin B1 aldehyde reductase member 2	O43488	FALSE	0	0.136478	0.321875	0.229176	0.00344797	0.0010204	6.1117	FALSE	FALSE	Stable	Stable
AKT1	19.9714	19.892	19.9923	19.8418	19.7901	19.665	P31749	P31749	AKT1_HUMAN	AKT1	RAC-alpha serine/threonine-protein kinase	P31749	FALSE	0	-0.329527	-0.0429913	-0.186259	0.0364105	0.0193609	-3.2139	FALSE	FALSE	Stable	Stable
AKT1S1	20.9364	20.8842	20.5032	20.5448	20.52	20.3755	Q96B36	Q96B36	AKTS1_HUMAN	AKT1S1	Proline-rich AKT1 substrate 1	Q96B36	FALSE	0	-0.604061	0.0150813	-0.29449	0.0930099	0.0587046	-2.35166	FALSE	FALSE	Stable	Stable
AKT2	21.0992	20.9858	21.0236	20.7178	20.6529	20.687	P31751	P31751	AKT2_HUMAN	AKT2	RAC-beta serine/threonine-protein kinase	P31751	FALSE	0	-0.455578	-0.245012	-0.350295	0.00107425	0.000215542	-8.22506	FALSE	FALSE	Stable	Stable
AKT3	20.0623	20.1548	20.1624	19.518	19.4836	19.4615	Q9Y243	Q9Y243	AKT3_HUMAN	AKT3	RAC-gamma serine/threonine-protein kinase	Q9Y243	FALSE	0	-0.740826	-0.536727	-0.638776	0.000108028	6.55263e-06	-15.474	TRUE	TRUE	Down	Down
ALAD	21.5957	21.4776	21.5987	21.358	21.3501	21.3605	P13716	P13716	HEM2_HUMAN	ALAD	Delta-aminolevulinic acid dehydratase	P13716	FALSE	0	-0.309159	-0.0931064	-0.201133	0.0103813	0.00408836	-4.60275	FALSE	FALSE	Stable	Stable
ALAS1	18.118	18.2287	18.1001	18.8216	19.0362	19.0243	P13196	P13196	HEM1_HUMAN	ALAS1	5-aminolevulinate synthase, non-specific, mitochondrial	P13196	FALSE	0	0.631944	0.991606	0.811775	0.00035107	4.0781e-05	11.1592	TRUE	TRUE	Up	Up
ALCAM	24.8907	25.0135	24.9837	25.2113	25.1698	25.2258	Q13740	Q13740	CD166_HUMAN	ALCAM	CD166 antigen	Q13740	FALSE	0	0.13069	0.348653	0.239672	0.00547554	0.00183482	5.4366	FALSE	FALSE	Stable	Stable
ALDH16A1	22.6498	22.7742	22.6841	22.0619	22.1851	22.0695	Q8IZ83	Q8IZ83	A16A1_HUMAN	ALDH16A1	Aldehyde dehydrogenase family 16 member A1	Q8IZ83	FALSE	0	-0.72939	-0.465078	-0.597234	0.000349675	4.0529e-05	-11.1717	TRUE	TRUE	Down	Down
ALDH18A1	23.7679	23.7664	23.7583	24.0567	24.0139	24.0335	P54886	P54886	P5CS_HUMAN	ALDH18A1	Delta-1-pyrroline-5-carboxylate synthase	P54886	FALSE	0	0.195918	0.345068	0.270493	0.000785297	0.000135316	8.96657	FALSE	FALSE	Stable	Stable
ALDH1A3	22.8092	22.8568	22.8183	20.9578	16.9435	16.1964	P47895	P30837;P47895	AL1A3_HUMAN	ALDH1A3	Aldehyde dehydrogenase family 1 member A3	P47895	TRUE	1	-7.84277	-1.74833	-4.79555	0.0189844	0.0087502	-3.89044	FALSE	FALSE	Down	Stable
ALDH1B1	22.546	22.4847	22.391	22.3548	22.3389	22.2936	P30837	P30837	AL1B1_HUMAN	ALDH1B1	Aldehyde dehydrogenase X, mitochondrial	P30837	FALSE	0	-0.266988	-0.0225769	-0.144782	0.0489721	0.02763	-2.9288	FALSE	FALSE	Stable	Stable
ALDH1L2	20.5155	20.4292	20.4629	20.7215	20.5731	20.7205	Q3SY69	O75891;Q3SY69	AL1L2_HUMAN	ALDH1L2	Mitochondrial 10-formyltetrahydrofolate dehydrogenase	Q3SY69	FALSE	0	0.0687645	0.336226	0.202495	0.0217074	0.0103381	3.74324	FALSE	FALSE	Stable	Stable
ALDH2	20.4513	20.4523	20.3958	23.1157	23.0559	23.0796	P05091	P05091	ALDH2_HUMAN	ALDH2	Aldehyde dehydrogenase, mitochondrial	P05091	FALSE	0	2.5632	2.73797	2.65059	8.94474e-07	7.85329e-10	74.9837	TRUE	TRUE	Up	Up
ALDH3A2	22.2221	22.1772	22.1822	22.1083	22.0199	22.0783	P51648	P51648	AL3A2_HUMAN	ALDH3A2	Aldehyde dehydrogenase family 3 member A2	P51648	FALSE	0	-0.217669	-0.0322998	-0.124984	0.0322321	0.0167366	-3.33359	FALSE	FALSE	Stable	Stable
ALDH3B1	20.8926	21.0412	21.0415	20.177	20.2236	20.2353	P43353	P43353	AL3B1_HUMAN	ALDH3B1	Aldehyde dehydrogenase family 3 member B1	P43353	FALSE	0	-0.908835	-0.650749	-0.779792	0.00012171	7.99121e-06	-14.9385	TRUE	TRUE	Down	Down
ALDH4A1	22.0257	22.0324	22.0235	20.9012	21.0362	21.0697	P30038	P30038	AL4A1_HUMAN	ALDH4A1	Delta-1-pyrroline-5-carboxylate dehydrogenase, mitochondrial	P30038	FALSE	0	-1.15199	-0.897736	-1.02486	4.61453e-05	1.56294e-06	-19.9291	TRUE	TRUE	Down	Down
ALDH5A1	19.6274	19.6245	19.6878	20.283	20.2066	20.2399	P51649	P51649	SSDH_HUMAN	ALDH5A1	Succinate-semialdehyde dehydrogenase, mitochondrial	P51649	FALSE	0	0.503066	0.690163	0.596615	0.000100943	5.89678e-06	15.766	TRUE	TRUE	Up	Up
ALDH6A1	22.1136	22.1387	22.196	21.726	21.7599	21.6952	Q02252	Q02252	MMSA_HUMAN	ALDH6A1	Methylmalonate-semialdehyde dehydrogenase [acylating], mitochondrial	Q02252	FALSE	0	-0.516623	-0.32817	-0.422397	0.000359934	4.23839e-05	-11.0818	FALSE	FALSE	Stable	Stable
ALDH7A1	24.6948	24.7884	24.6755	24.7553	24.7253	24.7233	P49419	P49419	AL7A1_HUMAN	ALDH7A1	Alpha-aminoadipic semialdehyde dehydrogenase	P49419	FALSE	0	-0.0873493	0.117472	0.0150615	0.77592	0.729155	0.363568	FALSE	FALSE	Stable	Stable
ALDH9A1	24.2407	24.2392	24.2707	24.3387	24.2846	24.2779	P49189	P49189	AL9A1_HUMAN	ALDH9A1	4-trimethylaminobutyraldehyde dehydrogenase	P49189	FALSE	0	-0.0328244	0.133263	0.0502195	0.24874	0.187588	1.49496	FALSE	FALSE	Stable	Stable
ALDOA	28.039	28.1085	28.0172	28.0227	28.1718	28.1536	P04075	P04075;Cont_P00883	ALDOA_HUMAN	ALDOA	Fructose-bisphosphate aldolase A	P04075	FALSE	0	-0.0710088	0.193301	0.061146	0.3675	0.298023	1.1438	FALSE	FALSE	Stable	Stable
ALDOC	21.0778	20.9863	21.0918	21.4399	21.3765	21.2896	P09972	P09972	ALDOC_HUMAN	ALDOC	Fructose-bisphosphate aldolase C	P09972	FALSE	0	0.184115	0.449254	0.316684	0.00395164	0.00121425	5.90538	FALSE	FALSE	Stable	Stable
ALG1	20.1703	19.9672	20.0314	20.6712	20.6349	20.5235	Q9BT22	Q9BT22;Q6GMV1	ALG1_HUMAN	ALG1	Chitobiosyldiphosphodolichol beta-mannosyltransferase	Q9BT22	FALSE	0	0.384762	0.722435	0.553598	0.0011398	0.000233098	8.10574	TRUE	TRUE	Up	Up
ALG10	19.964	19.7367	19.85	19.703	19.5746	19.5494	Q5BKT4;Q5I7T1	Q5BKT4;Q5I7T1	AG10A_HUMAN;AG10B_HUMAN	ALG10;ALG10B	Dol-P-Glc:Glc(2)Man(9)GlcNAc(2)-PP-Dol alpha-1,2-glucosyltransferase	Q5BKT4	FALSE	0	-0.422227	-0.0602433	-0.241235	0.0334862	0.0175388	-3.29493	FALSE	FALSE	Stable	Stable
ALG11	21.0039	20.875	20.9668	20.4814	20.4173	20.4589	Q2TAA5	Q2TAA5	ALG11_HUMAN	ALG11	GDP-Man:Man(3)GlcNAc(2)-PP-Dol alpha-1,2-mannosyltransferase	Q2TAA5	FALSE	0	-0.608305	-0.383745	-0.496025	0.000377962	4.59493e-05	-10.9211	FALSE	FALSE	Stable	Stable
ALG12	18.7133	19.1386	18.899	19.5856	19.5177	19.5761	Q9BV10	Q9BV10	ALG12_HUMAN	ALG12	Dol-P-Man:Man(7)GlcNAc(2)-PP-Dol alpha-1,6-mannosyltransferase	Q9BV10	FALSE	0	0.376149	0.909533	0.642841	0.00381303	0.00116028	5.95879	TRUE	TRUE	Up	Up
ALG13	20.211	19.838	20.0002	20.3348	20.3554	20.2788	Q9NP73	Q9NP73	ALG13_HUMAN	ALG13	Putative bifunctional UDP-N-acetylglucosamine transferase and deubiquitinase ALG13	Q9NP73	FALSE	0	0.0687021	0.544497	0.3066	0.0374168	0.0200359	3.186	FALSE	FALSE	Stable	Stable
ALG2	20.0843	20.2176	19.9259	20.374	20.2104	20.3854	Q9H553	Q9H553	ALG2_HUMAN	ALG2	Alpha-1,3/1,6-mannosyltransferase ALG2	Q9H553	FALSE	0	0.026795	0.467871	0.247333	0.0582253	0.0337475	2.77244	FALSE	FALSE	Stable	Stable
ALG3	21.1663	21.3329	21.2495	22.0027	21.8266	21.8819	Q92685	Q92685	ALG3_HUMAN	ALG3	Dol-P-Man:Man(5)GlcNAc(2)-PP-Dol alpha-1,3-mannosyltransferase	Q92685	FALSE	0	0.49236	0.815878	0.654119	0.000524527	7.47781e-05	9.99662	TRUE	TRUE	Up	Up
ALG5	22.1594	22.224	22.2119	22.0133	21.9906	22.0746	Q9Y673	Q9Y673	ALG5_HUMAN	ALG5	Dolichyl-phosphate beta-glucosyltransferase	Q9Y673	FALSE	0	-0.268304	-0.0762223	-0.172263	0.0119496	0.00486296	-4.43405	FALSE	FALSE	Stable	Stable
ALG8	20.5836	20.387	20.6667	20.6944	20.5559	20.586	Q9BVK2	Q9BVK2	ALG8_HUMAN	ALG8	Probable dolichyl pyrophosphate Glc1Man9GlcNAc2 alpha-1,3-glucosyltransferase	Q9BVK2	FALSE	0	-0.137629	0.270249	0.06631	0.523144	0.453414	0.803791	FALSE	FALSE	Stable	Stable
ALKBH1	20.3713	20.361	20.6085	21.4478	21.5111	21.5206	Q13686	Q13686	ALKB1_HUMAN	ALKBH1	Nucleic acid dioxygenase ALKBH1	Q13686	FALSE	0	0.859606	1.23284	1.04622	0.000159968	1.21817e-05	13.8592	TRUE	TRUE	Up	Up
ALKBH3	19.9361	19.8813	19.8259	19.9043	19.9484	19.9631	Q96Q83	Q96Q83	ALKB3_HUMAN	ALKBH3	Alpha-ketoglutarate-dependent dioxygenase alkB homolog 3	Q96Q83	FALSE	0	-0.044932	0.15998	0.0575239	0.279592	0.216472	1.38796	FALSE	FALSE	Stable	Stable
ALKBH4	20.3802	20.3205	20.2414	20.0887	20.2445	20.0591	Q9NXW9	Q9NXW9	ALKB4_HUMAN	ALKBH4	Alpha-ketoglutarate-dependent dioxygenase alkB homolog 4	Q9NXW9	FALSE	0	-0.343801	-0.0227725	-0.183287	0.0550445	0.0316302	-2.82281	FALSE	FALSE	Stable	Stable
ALKBH5	21.1126	21.1456	21.1552	21.2509	21.2178	21.225	Q6P6C2	Q6P6C2	ALKB5_HUMAN	ALKBH5	RNA demethylase ALKBH5	Q6P6C2	FALSE	0	0.0158838	0.170957	0.0934204	0.046369	0.0259463	2.97851	FALSE	FALSE	Stable	Stable
ALKBH6	20.3252	20.3131	20.4601	20.4117	20.3961	20.4404	Q3KRA9	Q3KRA9	ALKB6_HUMAN	ALKBH6	Alpha-ketoglutarate-dependent dioxygenase alkB homolog 6	Q3KRA9	FALSE	0	-0.0726612	0.172466	0.0499023	0.424886	0.354574	1.00652	FALSE	FALSE	Stable	Stable
ALKBH7	18.2063	18.513	18.1871	18.3391	18.3372	18.4286	Q9BT30	Q9BT30	ALKB7_HUMAN	ALKBH7	Alpha-ketoglutarate-dependent dioxygenase alkB homolog 7, mitochondrial	Q9BT30	FALSE	0	-0.17064	0.302922	0.0661407	0.583432	0.516711	0.690536	FALSE	FALSE	Stable	Stable
ALKBH8	15.6386	15.3237	15.4221	14.7299	15.1932	13.9475	Q96BT7	Q96BT7	ALKB8_HUMAN	ALKBH8	Alkylated DNA repair protein alkB homolog 8	Q96BT7	FALSE	0	-1.61424	-0.0616243	-0.837933	0.0653725	0.0386258	-2.66833	FALSE	FALSE	Stable	Stable
ALMS1	19.2238	19.1656	19.1666	18.9381	19.0882	19.0127	Q8TCU4	Q8TCU4	ALMS1_HUMAN	ALMS1	Centrosome-associated protein ALMS1	Q8TCU4	FALSE	0	-0.292405	-0.0522092	-0.172307	0.0262127	0.0129832	-3.54676	FALSE	FALSE	Stable	Stable
ALS2	20.278	20.2887	20.2909	19.5404	19.4498	19.494	Q96Q42	Q96Q42	ALS2_HUMAN	ALS2	Alsin	Q96Q42	FALSE	0	-0.8797	-0.702489	-0.791095	3.4275e-05	8.73981e-07	-22.0714	TRUE	TRUE	Down	Down
ALYREF	24.5531	24.8658	24.7326	25.2518	25.1439	25.2777	Q86V81	Q86V81	THOC4_HUMAN	ALYREF	THO complex subunit 4	Q86V81	FALSE	0	0.290839	0.723742	0.50729	0.00426243	0.00133664	5.79375	TRUE	TRUE	Up	Up
AMACR	19.0977	19.2007	19.0457	19.3011	19.3134	19.0807	Q9UHK6	Q9UHK6	AMACR_HUMAN	AMACR	Alpha-methylacyl-CoA racemase	Q9UHK6	FALSE	0	-0.0777634	0.311808	0.117022	0.251434	0.190073	1.48517	FALSE	FALSE	Stable	Stable
AMBRA1	18.2194	18.1054	18.6148	18.9111	19.1074	18.531	Q9C0C7	Q9C0C7	AMRA1_HUMAN	AMBRA1	Activating molecule in BECN1-regulated autophagy protein 1	Q9C0C7	FALSE	0	0.0595907	1.01363	0.536612	0.0576909	0.0333812	2.78091	FALSE	FALSE	Stable	Stable
AMD1	18.6429	18.2944	18.7157	19.1972	19.1253	19.1915	P17707	P17707	DCAM_HUMAN	AMD1	S-adenosylmethionine decarboxylase proenzyme	P17707	FALSE	0	0.33951	0.901214	0.620362	0.0053872	0.0017955	5.46049	TRUE	TRUE	Up	Up
AMDHD2	21.7637	21.7566	21.6727	21.7001	21.8999	21.8298	Q9Y303	Q9Y303	NAGA_HUMAN	AMDHD2	N-acetylglucosamine-6-phosphate deacetylase	Q9Y303	FALSE	0	-0.0728262	0.230776	0.0789748	0.313101	0.247698	1.28611	FALSE	FALSE	Stable	Stable
AMFR	20.8135	21.0458	20.9043	20.8994	21.0191	21.0067	Q9UKV5	Q9UKV5	AMFR_HUMAN	AMFR	E3 ubiquitin-protein ligase AMFR	Q9UKV5	FALSE	0	-0.120496	0.228225	0.0538649	0.543907	0.475165	0.763699	FALSE	FALSE	Stable	Stable
AMMECR1	20.5866	20.9031	20.7105	20.1729	19.8206	20.0144	Q9Y4X0	Q9Y4X0	AMMR1_HUMAN	AMMECR1	Nuclear protein AMMECR1	Q9Y4X0	FALSE	0	-1.02221	-0.439339	-0.730777	0.00326953	0.000949489	-6.19874	TRUE	TRUE	Down	Down
AMMECR1L	18.9986	18.8717	19.0536	18.4758	18.4235	18.4275	Q6DCA0	Q6DCA0	AMERL_HUMAN	AMMECR1L	AMMECR1-like protein	Q6DCA0	FALSE	0	-0.667961	-0.396709	-0.532335	0.00058681	8.80404e-05	-9.70297	TRUE	TRUE	Down	Down
AMOTL1	19.5521	19.717	19.6866	19.2158	19.2985	19.2381	Q8IY63	Q8IY63	AMOL1_HUMAN	AMOTL1	Angiomotin-like protein 1	Q8IY63	FALSE	0	-0.536617	-0.265558	-0.401087	0.00170787	0.000401838	-7.31594	FALSE	FALSE	Stable	Stable
AMOTL2	21.3351	21.2844	21.1937	21.2439	21.3337	21.3109	Q9Y2J4	Q9Y2J4	AMOL2_HUMAN	AMOTL2	Angiomotin-like protein 2	Q9Y2J4	FALSE	0	-0.098288	0.148461	0.0250867	0.690773	0.633839	0.502668	FALSE	FALSE	Stable	Stable
AMPD2	22.2953	22.3642	22.3592	23.2436	23.177	23.1671	Q01433	Q01433	AMPD2_HUMAN	AMPD2	AMP deaminase 2	Q01433	FALSE	0	0.759259	0.95336	0.85631	3.56749e-05	9.34864e-07	21.8121	TRUE	TRUE	Up	Up
AMPD3	18.3254	18.0289	18.1301	18.5371	18.169	18.3593	Q01432	Q01432	AMPD3_HUMAN	AMPD3	AMP deaminase 3	Q01432	FALSE	0	-0.097847	0.485202	0.193678	0.210195	0.153701	1.64236	FALSE	FALSE	Stable	Stable
AMPH	20.2832	20.2779	20.0349	16.4172	15.9509	16.2841	P49418	P49418	AMPH_HUMAN	AMPH	Amphiphysin	P49418	TRUE	3	-4.32041	-3.64213	-3.98127	1.35228e-05	1.82998e-07	-29.0204	TRUE	TRUE	Down	Down
AMZ2	18.9912	18.9149	19.1611	19.3155	19.3044	19.4829	Q86W34	Q86W34	AMZ2_HUMAN	AMZ2	Archaemetzincin-2	Q86W34	FALSE	0	0.141471	0.548894	0.345183	0.0146331	0.00630364	4.18888	FALSE	FALSE	Stable	Stable
ANAPC1	21.4021	21.4275	21.5127	21.3939	21.3935	21.4157	Q9H1A4	Q9H1A4	APC1_HUMAN	ANAPC1	Anaphase-promoting complex subunit 1	Q9H1A4	FALSE	0	-0.145639	0.052894	-0.0463723	0.362957	0.293824	-1.15484	FALSE	FALSE	Stable	Stable
ANAPC10	20.3865	20.4638	20.5645	20.3586	20.393	20.5385	Q9UM13	Q9UM13	APC10_HUMAN	ANAPC10	Anaphase-promoting complex subunit 10	Q9UM13	FALSE	0	-0.212054	0.128899	-0.0415779	0.631139	0.569529	-0.602923	FALSE	FALSE	Stable	Stable
ANAPC11	16.8167	17.2857	17.2369	17.3269	17.3658	17.4107	Q9NYG5	Q9NYG5	APC11_HUMAN	ANAPC11	Anaphase-promoting complex subunit 11	Q9NYG5	FALSE	0	-0.0637886	0.573176	0.254694	0.142571	0.0974405	1.97696	FALSE	FALSE	Stable	Stable
ANAPC13	21.0419	20.9946	21.3678	20.911	21.0247	21.0507	Q9BS18	Q9BS18	APC13_HUMAN	ANAPC13	Anaphase-promoting complex subunit 13	Q9BS18	FALSE	0	-0.405994	0.127334	-0.13933	0.311208	0.245902	-1.29164	FALSE	FALSE	Stable	Stable
ANAPC16	19.5811	19.8206	19.659	19.5208	19.5982	19.5262	Q96DE5	Q96DE5	APC16_HUMAN	ANAPC16	Anaphase-promoting complex subunit 16	Q96DE5	FALSE	0	-0.307686	0.03078	-0.138453	0.135207	0.0915867	-2.02247	FALSE	FALSE	Stable	Stable
ANAPC2	21.452	21.4028	21.3183	21.1866	21.2475	21.2592	Q9UJX6	Q9UJX6	ANC2_HUMAN	ANAPC2	Anaphase-promoting complex subunit 2	Q9UJX6	FALSE	0	-0.276135	-0.0437803	-0.159958	0.030075	0.0153842	-3.40367	FALSE	FALSE	Stable	Stable
ANAPC4	20.5684	20.5476	20.5822	20.3536	20.4201	20.3303	Q9UJX5	Q9UJX5	APC4_HUMAN	ANAPC4	Anaphase-promoting complex subunit 4	Q9UJX5	FALSE	0	-0.289594	-0.106552	-0.198073	0.0058377	0.00198549	-5.35017	FALSE	FALSE	Stable	Stable
ANAPC5	20.6222	20.5813	20.6317	20.6136	20.566	20.4973	Q9UJX4	Q9UJX4	APC5_HUMAN	ANAPC5	Anaphase-promoting complex subunit 5	Q9UJX4	FALSE	0	-0.156359	0.0507695	-0.0527947	0.322501	0.256257	-1.26021	FALSE	FALSE	Stable	Stable
ANAPC7	22.5347	22.4735	22.4465	22.4724	22.4683	22.4574	Q9UJX3	Q9UJX3	APC7_HUMAN	ANAPC7	Anaphase-promoting complex subunit 7	Q9UJX3	FALSE	0	-0.107514	0.0697561	-0.0188791	0.675966	0.618163	-0.52655	FALSE	FALSE	Stable	Stable
ANGEL2	18.3285	18.5132	18.5723	18.1283	18.3925	18.7127	Q5VTE6	Q5VTE6	ANGE2_HUMAN	ANGEL2	Protein angel homolog 2	Q5VTE6	FALSE	0	-0.446119	0.325785	-0.0601671	0.761866	0.713789	-0.38538	FALSE	FALSE	Stable	Stable
ANK1	18.1398	18.2529	17.8628	18.9835	18.946	19.1154	P16157	P16157	ANK1_HUMAN	ANK1	Ankyrin-1	P16157	FALSE	0	0.659452	1.20021	0.929831	0.000944109	0.000180455	8.50148	TRUE	TRUE	Up	Up
ANKFY1	22.1245	22.1743	22.144	22.254	22.1307	22.138	Q9P2R3	Q9P2R3	ANFY1_HUMAN	ANKFY1	Rabankyrin-5	Q9P2R3	FALSE	0	-0.0853351	0.138594	0.0266295	0.639486	0.578873	0.587958	FALSE	FALSE	Stable	Stable
ANKHD1	22.1421	22.1526	22.109	22.3546	22.349	22.3504	Q8IWZ3	Q8IWZ3	ANKH1_HUMAN	ANKHD1	Ankyrin repeat and KH domain-containing protein 1	Q8IWZ3	FALSE	0	0.141803	0.291745	0.216774	0.00186646	0.000454079	7.14786	FALSE	FALSE	Stable	Stable
ANKIB1	19.6965	19.5143	19.3183	19.299	19.4316	19.2606	Q9P2G1	Q9P2G1	AKIB1_HUMAN	ANKIB1	Ankyrin repeat and IBR domain-containing protein 1	Q9P2G1	FALSE	0	-0.438005	0.0793009	-0.179352	0.19365	0.139408	-1.71417	FALSE	FALSE	Stable	Stable
ANKLE2	21.1308	21.1477	21.1337	21.1049	21.191	21.0394	Q86XL3	Q86XL3	ANKL2_HUMAN	ANKLE2	Ankyrin repeat and LEM domain-containing protein 2	Q86XL3	FALSE	0	-0.140387	0.0890895	-0.0256485	0.660603	0.601306	-0.55261	FALSE	FALSE	Stable	Stable
ANKMY2	21.5478	21.523	21.4665	21.5243	21.3404	21.3393	Q8IV38	Q8IV38	ANKY2_HUMAN	ANKMY2	Ankyrin repeat and MYND domain-containing protein 2	Q8IV38	FALSE	0	-0.263971	0.0418301	-0.111071	0.176302	0.12474	-1.79578	FALSE	FALSE	Stable	Stable
ANKRD11	18.6415	17.7391	18.9385	18.3244	18.3203	18.4008	Q6UB99	Q6UB99	ANR11_HUMAN	ANKRD11	Ankyrin repeat domain-containing protein 11	Q6UB99	FALSE	0	-0.839493	0.657086	-0.0912036	0.814131	0.773766	-0.301305	FALSE	FALSE	Stable	Stable
ANKRD13A	21.8958	22.0851	22.0714	21.8459	21.7639	21.8281	Q8IZ07	Q8IZ07	AN13A_HUMAN	ANKRD13A	Ankyrin repeat domain-containing protein 13A	Q8IZ07	FALSE	0	-0.357354	-0.0522524	-0.204803	0.0327228	0.0170378	-3.31884	FALSE	FALSE	Stable	Stable
ANKRD13D	19.246	19.7135	19.6166	19.452	19.7846	19.694	Q6ZTN6	Q6ZTN6	AN13D_HUMAN	ANKRD13D	Ankyrin repeat domain-containing protein 13D	Q6ZTN6	FALSE	0	-0.246344	0.482694	0.118175	0.524282	0.45467	0.801439	FALSE	FALSE	Stable	Stable
ANKRD16	17.7085	17.4286	17.7403	18.0696	18.2834	18.1492	Q6P6B7	Q6P6B7	ANR16_HUMAN	ANKRD16	Ankyrin repeat domain-containing protein 16	Q6P6B7	FALSE	0	0.290555	0.792672	0.541614	0.0059119	0.00201692	5.33309	TRUE	TRUE	Up	Up
ANKRD17	20.3894	20.433	20.4444	20.2383	20.258	20.28	O75179	O75179	ANR17_HUMAN	ANKRD17	Ankyrin repeat domain-containing protein 17	O75179	FALSE	0	-0.245212	-0.0817153	-0.163464	0.0079051	0.00291552	-4.94318	FALSE	FALSE	Stable	Stable
ANKRD26	19.4361	19.3922	19.5404	19.589	19.5601	19.5191	Q9UPS8	Q9UPS8	ANR26_HUMAN	ANKRD26	Ankyrin repeat domain-containing protein 26	Q9UPS8	FALSE	0	-0.0219341	0.221599	0.0998323	0.134539	0.0910501	2.02678	FALSE	FALSE	Stable	Stable
ANKRD27	18.6192	18.5531	18.5362	18.9362	18.7519	18.8277	Q96NW4	Q96NW4	ANR27_HUMAN	ANKRD27	Ankyrin repeat domain-containing protein 27	Q96NW4	FALSE	0	0.12859	0.409585	0.269087	0.00929007	0.00357964	4.73466	FALSE	FALSE	Stable	Stable
ANKRD28	20.5154	20.5873	20.696	20.6246	20.4467	20.5783	O15084	O15084	ANR28_HUMAN	ANKRD28	Serine/threonine-protein phosphatase 6 regulatory ankyrin repeat subunit A	O15084	FALSE	0	-0.218959	0.119496	-0.0497313	0.563492	0.496003	-0.72648	FALSE	FALSE	Stable	Stable
ANKRD34C	20.3169	19.3071	20.4283	19.8142	19.7606	19.8832	P0C6C1	P0C6C1	AN34C_HUMAN	ANKRD34C	Ankyrin repeat domain-containing protein 34C	P0C6C1	FALSE	0	-0.939836	0.543684	-0.198076	0.59942	0.534666	-0.660136	FALSE	FALSE	Stable	Stable
ANKRD39	16.1744	16.3784	16.1204	16.5939	16.7514	16.836	Q53RE8	Q53RE8	ANR39_HUMAN	ANKRD39	Ankyrin repeat domain-containing protein 39	Q53RE8	FALSE	0	0.273721	0.7317	0.502711	0.00550616	0.00185075	5.42708	TRUE	TRUE	Up	Up
ANKRD40	20.8578	20.8031	20.8659	21.3706	21.3133	21.0817	Q6AI12	Q6AI12	ANR40_HUMAN	ANKRD40	Ankyrin repeat domain-containing protein 40	Q6AI12	FALSE	0	0.213859	0.612023	0.412941	0.00685578	0.00244315	5.12767	FALSE	FALSE	Stable	Stable
ANKRD44	18.5214	18.477	18.4065	16.1447	15.9849	16.1519	Q8N8A2	Q8N8A2	ANR44_HUMAN	ANKRD44	Serine/threonine-protein phosphatase 6 regulatory ankyrin repeat subunit B	Q8N8A2	TRUE	3	-2.5236	-2.22531	-2.37446	5.31258e-06	3.19101e-08	-39.3577	TRUE	TRUE	Down	Down
ANKRD50	19.8284	19.8317	19.8011	20.1526	20.1632	20.2082	Q9ULJ7	Q9ULJ7	ANR50_HUMAN	ANKRD50	Ankyrin repeat domain-containing protein 50	Q9ULJ7	FALSE	0	0.273609	0.43493	0.35427	0.000385822	4.74514e-05	10.8577	FALSE	FALSE	Stable	Stable
ANKRD52	20.947	20.9758	20.9601	20.8399	20.8597	20.9446	Q8NB46	Q8NB46	ANR52_HUMAN	ANKRD52	Serine/threonine-protein phosphatase 6 regulatory ankyrin repeat subunit C	Q8NB46	FALSE	0	-0.177291	0.0181662	-0.0795626	0.136777	0.0928287	-2.01257	FALSE	FALSE	Stable	Stable
ANKS1A	18.5959	18.5693	18.8553	18.3292	18.4472	18.1865	Q92625	Q92625	ANS1A_HUMAN	ANKS1A	Ankyrin repeat and SAM domain-containing protein 1A	Q92625	FALSE	0	-0.606146	-0.0989407	-0.352543	0.0291516	0.0147917	-3.43655	FALSE	FALSE	Stable	Stable
ANKS3	16.7208	17.1202	16.8483	16.2102	15.8226	15.9223	Q6ZW76	Q6ZW76	ANKS3_HUMAN	ANKS3	Ankyrin repeat and SAM domain-containing protein 3	Q6ZW76	TRUE	2	-1.25937	-0.563419	-0.911394	0.00276479	0.000759472	-6.47473	TRUE	TRUE	Down	Down
ANKZF1	20.6449	20.692	20.6756	20.206	20.2527	20.2576	Q9H8Y5	Q9H8Y5	ANKZ1_HUMAN	ANKZF1	Ankyrin repeat and zinc finger domain-containing protein 1	Q9H8Y5	FALSE	0	-0.514723	-0.349408	-0.432065	0.000202043	1.80316e-05	-12.922	FALSE	FALSE	Stable	Stable
ANLN	23.0215	22.9979	22.9992	23.1366	23.0867	23.1582	Q9NQW6	Q9NQW6	ANLN_HUMAN	ANLN	Anillin	Q9NQW6	FALSE	0	0.037121	0.204776	0.120948	0.0256772	0.0126815	3.56679	FALSE	FALSE	Stable	Stable
ANO10	21.9659	21.8765	22.0247	22.2371	22.1795	22.1445	Q9NW15	Q9NW15	ANO10_HUMAN	ANO10	Anoctamin-10	Q9NW15	FALSE	0	0.105474	0.357249	0.231361	0.010906	0.00434414	4.5433	FALSE	FALSE	Stable	Stable
ANO6	21.804	21.7607	21.672	21.6862	21.6686	21.676	Q4KMQ2	Q4KMQ2	ANO6_HUMAN	ANO6	Anoctamin-6	Q4KMQ2	FALSE	0	-0.175357	0.038146	-0.0686057	0.22337	0.165291	-1.58873	FALSE	FALSE	Stable	Stable
ANO8	17.18	17.3385	17.3222	17.4897	17.3222	17.4237	Q9HCE9	Q9HCE9	ANO8_HUMAN	ANO8	Anoctamin-8	Q9HCE9	FALSE	0	-0.0287258	0.291937	0.131606	0.134128	0.0907542	2.02918	FALSE	FALSE	Stable	Stable
ANP32A	25.074	24.9804	24.884	24.8965	25.0325	24.8789	P39687	P39687;O43423	AN32A_HUMAN	ANP32A	Acidic leucine-rich nuclear phosphoprotein 32 family member A	P39687	FALSE	0	-0.209841	0.122802	-0.0435192	0.606917	0.542644	-0.64684	FALSE	FALSE	Stable	Stable
ANP32B	26.4217	26.2136	26.4666	26.441	26.3827	26.3892	Q92688	Q92688	AN32B_HUMAN	ANP32B	Acidic leucine-rich nuclear phosphoprotein 32 family member B	Q92688	FALSE	0	-0.142208	0.216163	0.0369777	0.686259	0.628902	0.510154	FALSE	FALSE	Stable	Stable
ANP32E	23.6411	23.6083	23.6368	23.4761	23.5558	23.4852	Q9BTT0	Q9BTT0	AN32E_HUMAN	ANP32E	Acidic leucine-rich nuclear phosphoprotein 32 family member E	Q9BTT0	FALSE	0	-0.212609	-0.0334628	-0.123036	0.0303284	0.0155333	-3.39561	FALSE	FALSE	Stable	Stable
ANPEP	21.5006	21.5976	21.4288	21.3334	21.2599	21.3918	P15144	P15144	AMPN_HUMAN	ANPEP	Aminopeptidase N	P15144	FALSE	0	-0.326322	-0.0349683	-0.180645	0.0422849	0.0232635	-3.06549	FALSE	FALSE	Stable	Stable
ANTXR1	20.5965	20.469	20.6169	19.8367	19.9057	20.0698	Q9H6X2	Q9H6X2	ANTR1_HUMAN	ANTXR1	Anthrax toxin receptor 1	Q9H6X2	FALSE	0	-0.808483	-0.438319	-0.623401	0.00102662	0.000201804	-8.3266	TRUE	TRUE	Down	Down
ANTXR2	20.1395	19.8905	20.0638	20.7354	20.7148	20.7329	P58335	P58335	ANTR2_HUMAN	ANTXR2	Anthrax toxin receptor 2	P58335	FALSE	0	0.528791	0.864093	0.696442	0.00047869	6.45043e-05	10.2693	TRUE	TRUE	Up	Up
ANXA1	27.3341	27.3423	27.3429	27.342	27.4448	27.4603	P04083	P04083	ANXA1_HUMAN	ANXA1	Annexin A1	P04083	FALSE	0	-0.0278034	0.179701	0.0759489	0.173607	0.122408	1.80962	FALSE	FALSE	Stable	Stable
ANXA10	16.7001	16.7534	17.043	16.4908	16.8626	16.5744	Q9UJ72	Q9UJ72	ANX10_HUMAN	ANXA10	Annexin A10	Q9UJ72	FALSE	0	-0.516493	0.137383	-0.189555	0.266325	0.203766	-1.43329	FALSE	FALSE	Stable	Stable
ANXA11	24.4289	24.427	24.4496	24.2119	24.1468	24.1673	P50995	P50995	ANX11_HUMAN	ANXA11	Annexin A11	P50995	FALSE	0	-0.341483	-0.178204	-0.259844	0.00127426	0.000273231	-7.86822	FALSE	FALSE	Stable	Stable
ANXA2	29.3461	29.3303	29.306	29.1669	29.1987	29.2384	P07355	A6NMY6;P07355	ANXA2_HUMAN	ANXA2	Annexin A2	P07355	FALSE	0	-0.211408	-0.040904	-0.126156	0.0235387	0.0114011	-3.6582	FALSE	FALSE	Stable	Stable
ANXA3	24.6353	24.4879	24.5923	24.8291	24.8552	24.8622	P12429	P12429	ANXA3_HUMAN	ANXA3	Annexin A3	P12429	FALSE	0	0.161075	0.392955	0.277015	0.0039494	0.00121305	5.90654	FALSE	FALSE	Stable	Stable
ANXA4	23.0896	23.1067	23.1167	22.5035	22.5343	22.5189	P09525	P09525	ANXA4_HUMAN	ANXA4	Annexin A4	P09525	FALSE	0	-0.659435	-0.511438	-0.585436	4.89325e-05	1.73926e-06	-19.5578	TRUE	TRUE	Down	Down
ANXA5	27.3749	27.3027	27.3169	26.9724	26.9942	26.97	P08758	P08758	ANXA5_HUMAN	ANXA5	Annexin A5	P08758	FALSE	0	-0.437437	-0.26777	-0.352604	0.000477845	6.43075e-05	-10.275	FALSE	FALSE	Stable	Stable
ANXA6	26.3809	26.3463	26.3541	26.7029	26.6541	26.6934	P08133	P08133	ANXA6_HUMAN	ANXA6	Annexin A6	P08133	FALSE	0	0.243693	0.402341	0.323017	0.000509415	7.19676e-05	10.0667	FALSE	FALSE	Stable	Stable
ANXA7	24.7471	24.7092	24.7769	24.9286	24.8148	24.8923	P20073	P20073	ANXA7_HUMAN	ANXA7	Annexin A7	P20073	FALSE	0	0.0279423	0.240392	0.134167	0.0398816	0.0216742	3.12237	FALSE	FALSE	Stable	Stable
ANXA8L1	21.304	21.2368	21.2904	16.2527	16.3076	16.472	Q5VT79	P13928;Q5VT79	AXA81_HUMAN	ANXA8L1	Annexin A8-like protein 1	Q5VT79	TRUE	3	-5.09137	-4.77463	-4.933	8.94474e-07	6.73931e-10	-77.0044	TRUE	TRUE	Down	Down
AP1B1	22.6903	22.7151	22.6519	22.6455	22.6895	22.7168	Q10567	Q10567	AP1B1_HUMAN	AP1B1	AP-1 complex subunit beta-1	Q10567	FALSE	0	-0.0921057	0.0884055	-0.00185008	0.967779	0.961298	-0.0506735	FALSE	FALSE	Stable	Stable
AP1G1	22.7032	22.6476	22.7504	22.8111	22.7155	22.7411	O43747	O43747	AP1G1_HUMAN	AP1G1	AP-1 complex subunit gamma-1	O43747	FALSE	0	-0.0544396	0.165496	0.0555283	0.327098	0.260288	1.24828	FALSE	FALSE	Stable	Stable
AP1G2	21.0281	20.9254	21.0769	19.9338	19.9446	20.0402	O75843	O75843	AP1G2_HUMAN	AP1G2	AP-1 complex subunit gamma-like 2	O75843	FALSE	0	-1.17212	-0.902356	-1.03724	5.43528e-05	2.04392e-06	-19.01	TRUE	TRUE	Down	Down
AP1M1	21.9709	21.9353	22.0449	21.9726	21.8974	21.9877	Q9BXS5	Q9BXS5	AP1M1_HUMAN	AP1M1	AP-1 complex subunit mu-1	Q9BXS5	FALSE	0	-0.143435	0.0811726	-0.0311314	0.586053	0.519787	-0.685279	FALSE	FALSE	Stable	Stable
AP1S1	19.2669	19.0619	19.0792	19.1018	19.0276	19.1515	P61966	P61966	AP1S1_HUMAN	AP1S1	AP-1 complex subunit sigma-1A	P61966	FALSE	0	-0.211629	0.126955	-0.0423372	0.622429	0.560066	-0.61823	FALSE	FALSE	Stable	Stable
AP2A1	24.7031	24.7035	24.6861	24.6352	24.6253	24.5886	O95782	O95782	AP2A1_HUMAN	AP2A1	AP-2 complex subunit alpha-1	O95782	FALSE	0	-0.157847	-0.00459612	-0.0812216	0.0688639	0.0411232	-2.62037	FALSE	FALSE	Stable	Stable
AP2A2	23.1271	23.1253	23.1474	23.1661	23.1739	23.1957	O94973	O94973	AP2A2_HUMAN	AP2A2	AP-2 complex subunit alpha-2	O94973	FALSE	0	-0.0283209	0.118925	0.0453023	0.241568	0.181091	1.52114	FALSE	FALSE	Stable	Stable
AP2B1	24.7476	24.7513	24.7228	24.8264	24.7981	24.8152	P63010	P63010	AP2B1_HUMAN	AP2B1	AP-2 complex subunit beta	P63010	FALSE	0	-0.00152006	0.146874	0.072677	0.0859981	0.0534816	2.42144	FALSE	FALSE	Stable	Stable
AP2M1	23.8176	23.8151	23.7513	23.9629	23.8587	23.8537	Q96CW1	Q96CW1	AP2M1_HUMAN	AP2M1	AP-2 complex subunit mu	Q96CW1	FALSE	0	-0.0135926	0.207796	0.0971019	0.114439	0.0751172	2.16853	FALSE	FALSE	Stable	Stable
AP2S1	25.3196	25.3386	25.4277	25.3318	25.2983	25.4097	P53680	P53680	AP2S1_HUMAN	AP2S1	AP-2 complex subunit sigma	P53680	FALSE	0	-0.134592	0.103857	-0.0153673	0.802913	0.761242	-0.318637	FALSE	FALSE	Stable	Stable
AP3B1	23.1661	23.078	23.1634	23.0904	23.0131	23.0292	O00203	O00203	AP3B1_HUMAN	AP3B1	AP-3 complex subunit beta-1	O00203	FALSE	0	-0.195417	0.0123004	-0.0915585	0.113042	0.0740299	-2.17931	FALSE	FALSE	Stable	Stable
AP3D1	22.5095	22.5112	22.4421	22.4676	22.3245	22.3417	O14617	O14617	AP3D1_HUMAN	AP3D1	AP-3 complex subunit delta-1	O14617	FALSE	0	-0.235079	0.0156257	-0.109727	0.11502	0.0755863	-2.16393	FALSE	FALSE	Stable	Stable
AP3M1	22.7041	22.5469	22.7457	22.8487	22.6521	22.6688	Q9Y2T2	Q9Y2T2	AP3M1_HUMAN	AP3M1	AP-3 complex subunit mu-1	Q9Y2T2	FALSE	0	-0.135316	0.250653	0.0576682	0.556771	0.489084	0.738717	FALSE	FALSE	Stable	Stable
AP3S1	18.8451	19.3713	19.2468	19.0634	19.0551	18.6247	Q92572	Q92572	AP3S1_HUMAN	AP3S1	AP-3 complex subunit sigma-1	Q92572	FALSE	0	-0.68839	0.208342	-0.240024	0.300492	0.235827	-1.32338	FALSE	FALSE	Stable	Stable
AP3S2	17.4234	16.8239	17.5899	17.4923	15.979	17.2731	P59780	P59780	AP3S2_HUMAN	AP3S2	AP-3 complex subunit sigma-2	P59780	TRUE	1	-1.45098	0.722452	-0.364263	0.511128	0.4403	-0.828635	FALSE	FALSE	Stable	Stable
AP4B1	19.2348	19.2203	19.3155	19.3453	19.1809	19.3024	Q9Y6B7	Q9Y6B7	AP4B1_HUMAN	AP4B1	AP-4 complex subunit beta-1	Q9Y6B7	FALSE	0	-0.118136	0.156736	0.0193003	0.785951	0.740808	0.347158	FALSE	FALSE	Stable	Stable
AP4E1	21.0408	21.0121	20.9953	21.215	20.9884	21.0323	Q9UPM8	Q9UPM8	AP4E1_HUMAN	AP4E1	AP-4 complex subunit epsilon-1	Q9UPM8	FALSE	0	-0.0989365	0.223933	0.0624982	0.44732	0.376982	0.95705	FALSE	FALSE	Stable	Stable
AP4M1	20.7506	20.7914	20.5188	20.1202	20.4803	20.1487	O00189	O00189	AP4M1_HUMAN	AP4M1	AP-4 complex subunit mu-1	O00189	FALSE	0	-0.740816	-0.133625	-0.437221	0.0258574	0.0127805	-3.56016	FALSE	FALSE	Stable	Stable
AP4S1	20.8481	20.8403	20.6423	20.6576	20.8817	20.7584	Q9Y587	Q9Y587	AP4S1_HUMAN	AP4S1	AP-4 complex subunit sigma-1	Q9Y587	FALSE	0	-0.215877	0.193874	-0.0110017	0.917338	0.898908	-0.13275	FALSE	FALSE	Stable	Stable
AP5B1	18.7453	18.7555	18.7838	19.0239	19.0081	19.1736	Q2VPB7	Q2VPB7	AP5B1_HUMAN	AP5B1	AP-5 complex subunit beta-1	Q2VPB7	FALSE	0	0.175748	0.438308	0.307028	0.00430071	0.00135087	5.78154	FALSE	FALSE	Stable	Stable
AP5S1	19.8618	19.759	19.7266	20.0114	20.0151	20.1379	Q9NUS5	Q9NUS5	AP5S1_HUMAN	AP5S1	AP-5 complex subunit sigma-1	Q9NUS5	FALSE	0	0.133538	0.411123	0.27233	0.00850832	0.00319136	4.85059	FALSE	FALSE	Stable	Stable
AP5Z1	19.1502	18.6143	19.088	19.3442	19.4794	19.3284	O43299	O43299	AP5Z1_HUMAN	AP5Z1	AP-5 complex subunit zeta-1	O43299	FALSE	0	0.064139	0.80219	0.433164	0.0504302	0.0285955	2.90175	FALSE	FALSE	Stable	Stable
APAF1	20.6134	20.5522	20.6178	20.9172	20.8288	20.7976	O14727	O14727	APAF_HUMAN	APAF1	Apoptotic protease-activating factor 1	O14727	FALSE	0	0.142805	0.363988	0.253396	0.00466958	0.00149679	5.66425	FALSE	FALSE	Stable	Stable
APBB1	19.5522	19.8234	19.7861	19.4013	19.6039	19.6663	O00213	O00213	APBB1_HUMAN	APBB1	Amyloid beta precursor protein binding family B member 1	O00213	FALSE	0	-0.41368	0.0868073	-0.163436	0.21713	0.159611	-1.61454	FALSE	FALSE	Stable	Stable
APBB1IP	19.542	19.7531	19.7506	21.849	22.0054	21.9953	Q7Z5R6	Q7Z5R6	AB1IP_HUMAN	APBB1IP	Amyloid beta A4 precursor protein-binding family B member 1-interacting protein	Q7Z5R6	FALSE	0	2.077	2.45905	2.26803	1.3281e-05	1.71497e-07	29.3513	TRUE	TRUE	Up	Up
APBB2	20.0776	20.2799	20.0473	19.6441	19.6613	19.6878	Q92870	Q92870	APBB2_HUMAN	APBB2	Amyloid beta precursor protein binding family B member 2	Q92870	FALSE	0	-0.638375	-0.302632	-0.470503	0.0021044	0.00053447	-6.92868	FALSE	FALSE	Stable	Stable
APC	19.1905	19.3431	19.2007	19.2579	19.4046	19.4055	P25054	P25054	APC_HUMAN	APC	Adenomatous polyposis coli protein	P25054	FALSE	0	-0.0480609	0.270587	0.111263	0.191143	0.137111	1.72637	FALSE	FALSE	Stable	Stable
APEH	24.3159	24.2511	24.2932	23.8971	23.8894	23.8964	P13798	P13798	ACPH_HUMAN	APEH	Acylamino-acid-releasing enzyme	P13798	FALSE	0	-0.472636	-0.312267	-0.392451	0.000258115	2.60275e-05	-12.0993	FALSE	FALSE	Stable	Stable
APEX1	24.8946	24.8986	25.0244	25.0758	24.9715	25.0379	P27695	P27695	APEX1_HUMAN	APEX1	DNA-(apurinic or apyrimidinic site) endonuclease	P27695	FALSE	0	-0.0393776	0.21776	0.0891913	0.193513	0.13926	1.71495	FALSE	FALSE	Stable	Stable
APEX2	19.2063	19.5016	19.6804	19.2969	19.1321	19.246	Q9UBZ4	Q9UBZ4	APEX2_HUMAN	APEX2	DNA-(apurinic or apyrimidinic site) endonuclease 2	Q9UBZ4	FALSE	0	-0.547754	0.0722069	-0.237774	0.1567	0.108771	-1.89624	FALSE	FALSE	Stable	Stable
APH1A	20.3141	20.5715	20.7148	20.2854	20.1085	20.2838	Q96BI3	Q96BI3	APH1A_HUMAN	APH1A	Gamma-secretase subunit APH-1A	Q96BI3	FALSE	0	-0.586664	-0.0285726	-0.307618	0.0613819	0.0358726	-2.72522	FALSE	FALSE	Stable	Stable
APH1B	20.3636	20.4647	20.5014	19.7775	20.4402	20.3741	Q8WW43	Q8WW43	APH1B_HUMAN	APH1B	Gamma-secretase subunit APH-1B	Q8WW43	FALSE	0	-0.693941	0.201935	-0.246003	0.289255	0.22537	-1.35765	FALSE	FALSE	Stable	Stable
API5	23.8255	23.7803	23.8624	24.0513	24.0619	24.0519	Q9BZZ5	Q9BZZ5	API5_HUMAN	API5	Apoptosis inhibitor 5	Q9BZZ5	FALSE	0	0.14675	0.317841	0.232295	0.00240328	0.000630145	6.71284	FALSE	FALSE	Stable	Stable
APIP	20.9003	20.8664	21.0002	21.2199	20.9476	21.0317	Q96GX9	Q96GX9	MTNB_HUMAN	APIP	Methylthioribulose-1-phosphate dehydratase	Q96GX9	FALSE	0	-0.0540418	0.342191	0.144075	0.175988	0.124404	1.79776	FALSE	FALSE	Stable	Stable
APLP2	20.5221	20.6061	20.6096	21.8333	21.9271	21.8428	Q06481	Q06481	APLP2_HUMAN	APLP2	Amyloid beta precursor like protein 2	Q06481	FALSE	0	1.17838	1.39859	1.28848	1.35228e-05	1.86342e-07	28.9287	TRUE	TRUE	Up	Up
APMAP	25.0643	24.9807	25.0789	24.839	24.7705	24.8123	Q9HDC9	Q9HDC9	APMAP_HUMAN	APMAP	Adipocyte plasma membrane-associated protein	Q9HDC9	FALSE	0	-0.336738	-0.131401	-0.234069	0.00476037	0.00153459	-5.63599	FALSE	FALSE	Stable	Stable
APOB	21.4074	21.3693	21.4449	21.5981	21.7157	21.8584	P04114	P04114	APOB_HUMAN	APOB	Apolipoprotein B-100	P04114	FALSE	0	0.140981	0.492795	0.316888	0.011742	0.00476638	4.45336	FALSE	FALSE	Stable	Stable
APOBEC3B	22.126	21.9762	22.1353	21.3536	21.3236	21.4032	Q9UH17	Q96AK3;Q9UH17	ABC3B_HUMAN	APOBEC3B	DNA dC->dU-editing enzyme APOBEC-3B	Q9UH17	FALSE	0	-0.85483	-0.583249	-0.71904	0.000193818	1.67734e-05	-13.0902	TRUE	TRUE	Down	Down
APOBEC3C	20.0117	20.0387	20.1041	19.7772	19.5579	19.7127	Q9NRW3	Q9NRW3	ABC3C_HUMAN	APOBEC3C	DNA dC->dU-editing enzyme APOBEC-3C	Q9NRW3	FALSE	0	-0.530219	-0.207492	-0.368855	0.00471182	0.00151458	-5.65085	FALSE	FALSE	Stable	Stable
APOBEC3G	19.8806	19.8067	19.832	19.1917	19.1752	19.4432	Q9HC16	Q9HC16	ABC3G_HUMAN	APOBEC3G	DNA dC->dU-editing enzyme APOBEC-3G	Q9HC16	FALSE	0	-0.76666	-0.372785	-0.569723	0.0018635	0.000452855	-7.15154	TRUE	TRUE	Down	Down
APOL1	19.7209	19.4637	19.2937	20.0863	20.0561	20.0221	O14791	O14791	APOL1_HUMAN	APOL1	Apolipoprotein L1	O14791	FALSE	0	0.294165	0.829983	0.562074	0.00658903	0.00231146	5.18645	TRUE	TRUE	Up	Up
APOL2	22.8506	22.8238	22.9261	23.2711	23.2054	23.2725	Q9BQE5	Q9BQE5	APOL2_HUMAN	APOL2	Apolipoprotein L2	Q9BQE5	FALSE	0	0.278259	0.487463	0.382861	0.000756626	0.000128816	9.0483	FALSE	FALSE	Stable	Stable
APOL3	13.3987	15.8872	13.7423	15.3119	15.3745	15.1592	O95236	O95236	APOL3_HUMAN	APOL3	Apolipoprotein L3	O95236	TRUE	1	-0.671967	2.55027	0.939149	0.26416	0.201666	1.44103	FALSE	FALSE	Stable	Stable
APOO	22.3715	22.2439	22.2459	22.5021	22.5666	22.6541	Q9BUR5	Q9BUR5	MIC26_HUMAN	APOO	MICOS complex subunit MIC26	Q9BUR5	FALSE	0	0.143368	0.430946	0.287157	0.00794428	0.0029332	4.93695	FALSE	FALSE	Stable	Stable
APOOL	20.484	20.6159	20.4734	20.9641	20.9503	20.9045	Q6UXV4	Q6UXV4	MIC27_HUMAN	APOOL	MICOS complex subunit MIC27	Q6UXV4	FALSE	0	0.292063	0.538395	0.415229	0.00102256	0.000200825	8.33414	FALSE	FALSE	Stable	Stable
APP	20.7247	20.8112	20.7758	21.0505	21.0476	21.0186	P05067	P05067	A4_HUMAN	APP	Amyloid-beta precursor protein	P05067	FALSE	0	0.178936	0.357721	0.268329	0.00161568	0.000372865	7.42045	FALSE	FALSE	Stable	Stable
APPBP2	17.5255	17.1653	16.7039	16.921	16.8105	16.8971	Q92624	Q92624	APBP2_HUMAN	APPBP2	Amyloid protein-binding protein 2	Q92624	FALSE	0	-0.755046	0.244276	-0.255385	0.321419	0.255148	-1.26353	FALSE	FALSE	Stable	Stable
APPL1	22.0757	22.0668	22.0773	22.3078	22.2727	22.3368	Q9UKG1	Q9UKG1	DP13A_HUMAN	APPL1	DCC-interacting protein 13-alpha	Q9UKG1	FALSE	0	0.152617	0.312358	0.232488	0.00182085	0.000438415	7.19581	FALSE	FALSE	Stable	Stable
APPL2	22.4151	22.3286	22.4518	21.8895	21.7622	21.7534	Q8NEU8	Q8NEU8	DP13B_HUMAN	APPL2	DCC-interacting protein 13-beta	Q8NEU8	FALSE	0	-0.733712	-0.459921	-0.596816	0.000395742	4.94359e-05	-10.7774	TRUE	TRUE	Down	Down
APRT	23.9249	23.8288	23.7712	24.5542	24.6799	24.6427	P07741	P07741	APT_HUMAN	APRT	Adenine phosphoribosyltransferase	P07741	FALSE	0	0.645029	0.922957	0.783993	0.000157152	1.17585e-05	13.9468	TRUE	TRUE	Up	Up
APTX	20.2617	20.167	20.2885	20.4156	20.5264	20.5176	Q7Z2E3	Q7Z2E3	APTX_HUMAN	APTX	Aprataxin	Q7Z2E3	FALSE	0	0.120927	0.374008	0.247467	0.00859844	0.00324227	4.8345	FALSE	FALSE	Stable	Stable
AQR	22.9232	22.8507	22.9098	22.6858	22.6941	22.6641	O60306	O60306	AQR_HUMAN	AQR	RNA helicase aquarius	O60306	FALSE	0	-0.298801	-0.12768	-0.213241	0.00334228	0.000979416	-6.16112	FALSE	FALSE	Stable	Stable
ARAF	22.2645	22.1972	22.2375	22.1854	22.1687	22.1866	P10398	P10398	ARAF_HUMAN	ARAF	Serine/threonine-protein kinase A-Raf	P10398	FALSE	0	-0.134353	0.0286173	-0.0528679	0.219562	0.161929	-1.6039	FALSE	FALSE	Stable	Stable
ARAP1	20.4137	20.2611	20.3017	20.8284	20.7357	20.6568	Q96P48	Q96P48	ARAP1_HUMAN	ARAP1	Arf-GAP with Rho-GAP domain, ANK repeat and PH domain-containing protein 1	Q96P48	FALSE	0	0.259329	0.570216	0.414772	0.00256708	0.000689953	6.59632	FALSE	FALSE	Stable	Stable
ARAP3	21.0708	20.9592	21.0547	20.69	20.6173	20.6763	Q8WWN8	Q8WWN8	ARAP3_HUMAN	ARAP3	Arf-GAP with Rho-GAP domain, ANK repeat and PH domain-containing protein 3	Q8WWN8	FALSE	0	-0.477169	-0.256874	-0.367021	0.00106644	0.000213838	-8.23725	FALSE	FALSE	Stable	Stable
ARCN1	24.603	24.501	24.5246	24.712	24.6901	24.7008	P48444	P48444	COPD_HUMAN	ARCN1	Coatomer subunit delta	P48444	FALSE	0	0.0628412	0.253384	0.158113	0.0157631	0.00692034	4.10268	FALSE	FALSE	Stable	Stable
ARF1	27.5649	27.4214	27.551	27.7335	27.6146	27.702	P84077	P61204;P84077	ARF1_HUMAN	ARF1	ADP-ribosylation factor 1	P84077	FALSE	0	0.0327084	0.309168	0.170938	0.0426138	0.0235103	3.05704	FALSE	FALSE	Stable	Stable
ARF3	17.68	17.8886	17.9646	18.3604	18.1182	18.0955	P61204	P61204	ARF3_HUMAN	ARF3	ADP-ribosylation factor 3	P61204	FALSE	0	0.0898104	0.604142	0.346976	0.032177	0.0166997	3.33542	FALSE	FALSE	Stable	Stable
ARF4	26.9489	26.8966	27.0326	27.2462	27.0004	27.2221	P18085	P18085	ARF4_HUMAN	ARF4	ADP-ribosylation factor 4	P18085	FALSE	0	0.00317046	0.39057	0.19687	0.0778823	0.0473913	2.51255	FALSE	FALSE	Stable	Stable
ARF5	24.3925	23.9336	24.2359	24.0113	23.9794	23.8544	P84085	P84085	ARF5_HUMAN	ARF5	ADP-ribosylation factor 5	P84085	FALSE	0	-0.541701	0.0637162	-0.238993	0.146893	0.100845	-1.95175	FALSE	FALSE	Stable	Stable
ARF6	23.822	23.8597	23.7294	23.7347	23.6202	23.6904	P62330	P62330	ARF6_HUMAN	ARF6	ADP-ribosylation factor 6	P62330	FALSE	0	-0.248295	0.00438089	-0.121957	0.0895046	0.0560427	-2.38637	FALSE	FALSE	Stable	Stable
ARFGAP1	21.5178	21.4019	21.4142	21.8639	21.6643	21.7269	Q8N6T3	Q8N6T3	ARFG1_HUMAN	ARFGAP1	ADP-ribosylation factor GTPase-activating protein 1	Q8N6T3	FALSE	0	0.147781	0.46633	0.307055	0.00908787	0.00347033	4.76579	FALSE	FALSE	Stable	Stable
ARFGAP2	21.954	22.07	21.9472	22.0948	22.1748	22.1271	Q8N6H7	Q8N6H7	ARFG2_HUMAN	ARFGAP2	ADP-ribosylation factor GTPase-activating protein 2	Q8N6H7	FALSE	0	0.0239043	0.259764	0.141834	0.0466603	0.0261213	2.97318	FALSE	FALSE	Stable	Stable
ARFGAP3	21.7734	21.8741	21.8183	21.2993	21.2303	21.1893	Q9NP61	Q9NP61	ARFG3_HUMAN	ARFGAP3	ADP-ribosylation factor GTPase-activating protein 3	Q9NP61	FALSE	0	-0.695662	-0.468891	-0.582276	0.000215902	1.9908e-05	-12.6951	TRUE	TRUE	Down	Down
ARFGEF1	21.991	21.9645	21.9519	22.0033	21.9573	21.9244	Q9Y6D6	Q9Y6D5;Q9Y6D6	BIG1_HUMAN	ARFGEF1	Brefeldin A-inhibited guanine nucleotide-exchange protein 1	Q9Y6D6	FALSE	0	-0.0949831	0.0800684	-0.00745736	0.869781	0.840434	-0.210627	FALSE	FALSE	Stable	Stable
ARFGEF2	20.7822	20.8003	20.6934	21.1589	21.1628	21.2161	Q9Y6D5	Q9Y6D5	BIG2_HUMAN	ARFGEF2	Brefeldin A-inhibited guanine nucleotide-exchange protein 2	Q9Y6D5	FALSE	0	0.315991	0.525335	0.420663	0.000537754	7.73562e-05	9.935	FALSE	FALSE	Stable	Stable
ARFGEF3	16.7026	16.1303	16.6669	17.1857	15.7942	16.3696	Q5TH69	Q5TH69	BIG3_HUMAN	ARFGEF3	Brefeldin A-inhibited guanine nucleotide-exchange protein 3	Q5TH69	FALSE	0	-0.967829	0.867647	-0.0500911	0.916258	0.89726	-0.134929	FALSE	FALSE	Stable	Stable
ARFIP1	21.9903	21.9336	21.9532	21.8658	21.8754	21.9016	P53367	P53367	ARFP1_HUMAN	ARFIP1	Arfaptin-1	P53367	FALSE	0	-0.158904	0.00277781	-0.0780629	0.0894302	0.0559845	-2.38714	FALSE	FALSE	Stable	Stable
ARFIP2	21.954	22.016	21.9535	22.3775	22.4486	22.39	P53365	P53365	ARFP2_HUMAN	ARFIP2	Arfaptin-2	P53365	FALSE	0	0.337366	0.524365	0.430866	0.000326664	3.63752e-05	11.3919	FALSE	FALSE	Stable	Stable
ARFRP1	19.121	19.6696	19.7569	20.3796	20.2448	20.0777	Q13795	Q13795	ARFRP_HUMAN	ARFRP1	ADP-ribosylation factor-related protein 1	Q13795	FALSE	0	0.265042	1.17143	0.718235	0.0185613	0.00848585	3.91784	FALSE	FALSE	Up	Stable
ARGLU1	22.3483	22.2849	22.4141	22.2255	22.3633	22.3603	Q9NWB6	Q9NWB6	ARGL1_HUMAN	ARGLU1	Arginine and glutamate-rich protein 1	Q9NWB6	FALSE	0	-0.172592	0.107075	-0.0327587	0.64507	0.584426	-0.579134	FALSE	FALSE	Stable	Stable
ARHGAP1	23.7628	23.7361	23.6701	23.6291	23.7093	23.6177	Q07960	Q07960	RHG01_HUMAN	ARHGAP1	Rho GTPase-activating protein 1	Q07960	FALSE	0	-0.178792	0.036787	-0.0710026	0.213837	0.156639	-1.6284	FALSE	FALSE	Stable	Stable
ARHGAP10	20.9028	20.8455	20.8743	20.6735	20.6112	20.5064	A1A4S6	A1A4S6	RHG10_HUMAN	ARHGAP10	Rho GTPase-activating protein 10	A1A4S6	FALSE	0	-0.404159	-0.150159	-0.277159	0.00563511	0.0019057	-5.39496	FALSE	FALSE	Stable	Stable
ARHGAP11A	18.2284	18.7109	18.3201	17.9328	17.559	17.3729	Q6P4F7	Q6P4F7	RHGBA_HUMAN	ARHGAP11A	Rho GTPase-activating protein 11A	Q6P4F7	FALSE	0	-1.2596	-0.336831	-0.798215	0.0135788	0.00573755	-4.27683	FALSE	FALSE	Down	Stable
ARHGAP12	19.1326	19.3916	19.2914	19.4868	19.2174	19.3472	Q8IWW6	Q8IWW6	RHG12_HUMAN	ARHGAP12	Rho GTPase-activating protein 12	Q8IWW6	FALSE	0	-0.155292	0.312453	0.0785806	0.510153	0.439268	0.830614	FALSE	FALSE	Stable	Stable
ARHGAP17	23.9035	23.8545	23.9168	23.5566	23.4707	23.5271	Q68EM7	Q68EM7	RHG17_HUMAN	ARHGAP17	Rho GTPase-activating protein 17	Q68EM7	FALSE	0	-0.468865	-0.278144	-0.373505	0.000590559	8.90591e-05	-9.68258	FALSE	FALSE	Stable	Stable
ARHGAP18	20.906	20.9585	20.9356	22.0607	22.0522	22.098	Q8N392	Q8N392	RHG18_HUMAN	ARHGAP18	Rho GTPase-activating protein 18	Q8N392	FALSE	0	1.0551	1.21872	1.13691	8.46107e-06	6.96206e-08	34.3531	TRUE	TRUE	Up	Up
ARHGAP21	19.4173	19.5076	19.4812	19.3098	19.3498	19.3609	Q5T5U3	Q5T5U3	RHG21_HUMAN	ARHGAP21	Rho GTPase-activating protein 21	Q5T5U3	FALSE	0	-0.223115	-0.0338999	-0.128508	0.0314652	0.0162533	-3.35789	FALSE	FALSE	Stable	Stable
ARHGAP23	18.3188	18.0376	18.1778	17.8279	17.4705	17.935	Q9P227	Q9P227	RHG23_HUMAN	ARHGAP23	Rho GTPase-activating protein 23	Q9P227	FALSE	0	-0.775087	-0.0922075	-0.433647	0.039165	0.0212141	-3.13969	FALSE	FALSE	Stable	Stable
ARHGAP26	17.8458	17.96	17.6459	18.4894	18.2829	18.2814	Q9UNA1	Q9UNA1	RHG26_HUMAN	ARHGAP26	Rho GTPase-activating protein 26	Q9UNA1	FALSE	0	0.28722	0.78076	0.53399	0.00583963	0.0019869	5.34939	TRUE	TRUE	Up	Up
ARHGAP29	21.8945	21.9298	21.9202	22.1207	22.137	22.0748	Q52LW3	Q52LW3	RHG29_HUMAN	ARHGAP29	Rho GTPase-activating protein 29	Q52LW3	FALSE	0	0.113379	0.278591	0.195985	0.00405293	0.00125684	5.86512	FALSE	FALSE	Stable	Stable
ARHGAP31	19.533	19.2413	19.1298	19.844	20.3807	19.5703	Q2M1Z3	Q2M1Z3	RHG31_HUMAN	ARHGAP31	Rho GTPase-activating protein 31	Q2M1Z3	FALSE	0	0.0764765	1.18416	0.630318	0.0556105	0.0320127	2.81344	FALSE	FALSE	Stable	Stable
ARHGAP32	16.0241	16.1212	16.0719	18.6656	18.7734	18.9666	A7KAX9	A7KAX9;O14559;Q7Z6I6	RHG32_HUMAN	ARHGAP32	Rho GTPase-activating protein 32	A7KAX9	TRUE	3	2.52661	2.93226	2.72944	9.43568e-06	8.36942e-08	33.2673	TRUE	TRUE	Up	Up
ARHGAP35	22.1155	22.0919	22.1002	21.5777	21.6481	21.6074	Q9NRY4	Q9NRY4	RHG35_HUMAN	ARHGAP35	Rho GTPase-activating protein 35	Q9NRY4	FALSE	0	-0.574205	-0.40872	-0.491463	0.000129244	8.80492e-06	-14.6834	FALSE	FALSE	Stable	Stable
ARHGAP5	20.1116	19.9292	19.9382	19.7166	19.9263	19.8359	Q13017	Q13017	RHG05_HUMAN	ARHGAP5	Rho GTPase-activating protein 5	Q13017	FALSE	0	-0.355141	0.0216235	-0.166759	0.112029	0.0731327	-2.18833	FALSE	FALSE	Stable	Stable
ARHGDIA	26.1047	26.3495	26.2645	27.1584	27.1446	27.1875	P52565	P52565	GDIR1_HUMAN	ARHGDIA	Rho GDP-dissociation inhibitor 1	P52565	FALSE	0	0.758335	1.08954	0.923939	0.000161938	1.25172e-05	13.7923	TRUE	TRUE	Up	Up
ARHGDIB	22.1094	22.2114	22.1316	23.9355	23.9729	23.9247	P52566	P52566	GDIR2_HUMAN	ARHGDIB	Rho GDP-dissociation inhibitor 2	P52566	FALSE	0	1.69426	1.89279	1.79353	3.75064e-06	1.54317e-08	44.6668	TRUE	TRUE	Up	Up
ARHGEF1	22.667	22.6733	22.5816	22.3058	22.2956	22.3289	Q92888	Q92888	ARHG1_HUMAN	ARHGEF1	Rho guanine nucleotide exchange factor 1	Q92888	FALSE	0	-0.425425	-0.235642	-0.330534	0.000904589	0.000168422	-8.611	FALSE	FALSE	Stable	Stable
ARHGEF10	20.8777	20.8039	20.7849	20.8886	20.8809	20.9099	O15013	O15013	ARHGA_HUMAN	ARHGEF10	Rho guanine nucleotide exchange factor 10	O15013	FALSE	0	-0.0216848	0.163707	0.071011	0.157117	0.109137	1.89378	FALSE	FALSE	Stable	Stable
ARHGEF10L	15.0044	16.1714	15.6668	15.4528	15.7728	15.9035	Q9HCE6	Q9HCE6	ARGAL_HUMAN	ARHGEF10L	Rho guanine nucleotide exchange factor 10-like protein	Q9HCE6	TRUE	1	-0.656672	0.847693	0.0955102	0.805858	0.764657	0.313899	FALSE	FALSE	Stable	Stable
ARHGEF11	20.1624	20.2116	20.2101	19.9149	19.9472	20.0389	O15085	O15085	ARHGB_HUMAN	ARHGEF11	Rho guanine nucleotide exchange factor 11	O15085	FALSE	0	-0.336511	-0.118935	-0.227723	0.00664193	0.00233701	-5.17475	FALSE	FALSE	Stable	Stable
ARHGEF12	20.5918	20.5906	20.5522	20.1867	20.264	20.2698	Q9NZN5	Q9NZN5	ARHGC_HUMAN	ARHGEF12	Rho guanine nucleotide exchange factor 12	Q9NZN5	FALSE	0	-0.430993	-0.24506	-0.338026	0.000777879	0.000133537	-8.98848	FALSE	FALSE	Stable	Stable
ARHGEF16	19.7455	19.6524	19.5859	19.0314	19.0146	19.0741	Q5VV41	Q5VV41	ARHGG_HUMAN	ARHGEF16	Rho guanine nucleotide exchange factor 16	Q5VV41	FALSE	0	-0.744958	-0.497521	-0.621239	0.000233997	2.25647e-05	-12.4133	TRUE	TRUE	Down	Down
ARHGEF17	19.3659	19.4486	19.537	19.1658	19.2619	19.228	Q96PE2	Q96PE2	ARHGH_HUMAN	ARHGEF17	Rho guanine nucleotide exchange factor 17	Q96PE2	FALSE	0	-0.368387	-0.0955662	-0.231977	0.0144276	0.00620212	-4.20398	FALSE	FALSE	Stable	Stable
ARHGEF18	21.1006	21.0933	20.8495	20.9837	20.9377	20.9455	Q6ZSZ5	Q6ZSZ5	ARHGI_HUMAN	ARHGEF18	Rho guanine nucleotide exchange factor 18	Q6ZSZ5	FALSE	0	-0.24491	0.127273	-0.0588185	0.534779	0.465495	-0.781358	FALSE	FALSE	Stable	Stable
ARHGEF2	23.3046	23.3106	23.3544	23.5323	23.6351	23.6342	Q92974	Q92974	ARHG2_HUMAN	ARHGEF2	Rho guanine nucleotide exchange factor 2	Q92974	FALSE	0	0.173085	0.38152	0.277303	0.00259452	0.000700076	6.57776	FALSE	FALSE	Stable	Stable
ARHGEF26	15.2649	15.662	16.1832	16.0643	16.1908	15.9409	Q96DR7	Q96DR7	ARHGQ_HUMAN	ARHGEF26	Rho guanine nucleotide exchange factor 26	Q96DR7	FALSE	0	-0.209973	0.933871	0.361949	0.229455	0.170798	1.5645	FALSE	FALSE	Stable	Stable
ARHGEF28	20.0369	19.9702	19.8487	20.7504	20.7066	20.6603	Q8N1W1	Q8N1W1	ARG28_HUMAN	ARHGEF28	Rho guanine nucleotide exchange factor 28	Q8N1W1	FALSE	0	0.610213	0.897451	0.753832	0.00020001	1.76193e-05	12.9756	TRUE	TRUE	Up	Up
ARHGEF35	16.3298	17.1897	15.8187	17.3094	16.8193	16.5611	A5YM69;Q12774	Q12774;A5YM69	ARG35_HUMAN;ARHG5_HUMAN	ARHGEF35;ARHGEF5	Rho guanine nucleotide exchange factor 35	A5YM69	FALSE	0	-0.492192	1.39326	0.450535	0.352574	0.283921	1.18143	FALSE	FALSE	Stable	Stable
ARHGEF40	20.1733	20.0638	20.1052	19.1932	19.3267	19.2384	Q8TER5	Q8TER5	ARH40_HUMAN	ARHGEF40	Rho guanine nucleotide exchange factor 40	Q8TER5	FALSE	0	-0.986692	-0.735882	-0.861287	7.93333e-05	3.87926e-06	-16.9784	TRUE	TRUE	Down	Down
ARHGEF6	20.1666	20.161	20.4009	20.36	20.3756	20.4587	Q15052	Q15052	ARHG6_HUMAN	ARHGEF6	Rho guanine nucleotide exchange factor 6	Q15052	FALSE	0	-0.032842	0.343443	0.1553	0.132375	0.0893597	2.04056	FALSE	FALSE	Stable	Stable
ARHGEF7	22.5294	22.5665	22.5384	22.3781	22.3694	22.3848	Q14155	Q14155	ARHG7_HUMAN	ARHGEF7	Rho guanine nucleotide exchange factor 7	Q14155	FALSE	0	-0.241463	-0.0932508	-0.167357	0.00493365	0.00160876	-5.58281	FALSE	FALSE	Stable	Stable
ARID1A	21.705	21.6766	21.7043	21.6236	21.6366	21.7052	O14497	O14497	ARI1A_HUMAN	ARID1A	AT-rich interactive domain-containing protein 1A	O14497	FALSE	0	-0.129449	0.0490587	-0.0401952	0.37924	0.309887	-1.1133	FALSE	FALSE	Stable	Stable
ARID1B	19.7792	20.0627	20.0381	19.9589	19.9892	20.149	Q8NFD5	Q8NFD5	ARI1B_HUMAN	ARID1B	AT-rich interactive domain-containing protein 1B	Q8NFD5	FALSE	0	-0.161185	0.305928	0.0723716	0.542806	0.473886	0.766021	FALSE	FALSE	Stable	Stable
ARID2	20.9917	20.9307	20.9226	20.9468	20.8814	20.8401	Q68CP9	Q68CP9	ARID2_HUMAN	ARID2	AT-rich interactive domain-containing protein 2	Q68CP9	FALSE	0	-0.163694	0.0459656	-0.0588643	0.279572	0.216421	-1.38813	FALSE	FALSE	Stable	Stable
ARID4A	17.9552	17.8614	17.9416	18.0901	18.2281	18.0477	P29374	P29374	ARI4A_HUMAN	ARID4A	AT-rich interactive domain-containing protein 4A	P29374	FALSE	0	0.0572586	0.347819	0.202539	0.0288868	0.0146191	3.4464	FALSE	FALSE	Stable	Stable
ARID4B	19.308	19.3146	19.3517	19.1026	18.7402	19.0136	Q4LE39	P29374;Q4LE39	ARI4B_HUMAN	ARID4B	AT-rich interactive domain-containing protein 4B	Q4LE39	FALSE	0	-0.609624	-0.135642	-0.372633	0.019042	0.00878411	-3.88699	FALSE	FALSE	Stable	Stable
ARID5B	18.6623	18.5716	18.5213	18.415	18.401	18.2586	Q14865	Q14865	ARI5B_HUMAN	ARID5B	AT-rich interactive domain-containing protein 5B	Q14865	FALSE	0	-0.377493	-0.076222	-0.226858	0.0221036	0.010581	-3.72297	FALSE	FALSE	Stable	Stable
ARIH1	21.3652	21.2801	21.2418	21.1643	21.0328	21.1034	Q9Y4X5	Q9Y4X5	ARI1_HUMAN	ARIH1	E3 ubiquitin-protein ligase ARIH1	Q9Y4X5	FALSE	0	-0.324551	-0.0664682	-0.19551	0.0216591	0.0103121	-3.74544	FALSE	FALSE	Stable	Stable
ARIH2	20.4614	20.353	20.4228	20.7068	20.7644	20.7515	O95376	O95376	ARI2_HUMAN	ARIH2	E3 ubiquitin-protein ligase ARIH2	O95376	FALSE	0	0.226334	0.430675	0.328505	0.00122633	0.000258847	7.9484	FALSE	FALSE	Stable	Stable
ARL1	22.5641	22.6843	22.7851	23.0373	22.9871	23.0101	P40616	P40616	ARL1_HUMAN	ARL1	ADP-ribosylation factor-like protein 1	P40616	FALSE	0	0.181701	0.485593	0.333647	0.0055044	0.00184874	5.42827	FALSE	FALSE	Stable	Stable
ARL13B	18.5282	18.7577	18.9395	19.1239	19.1585	19.0344	Q3SXY8	Q3SXY8	AR13B_HUMAN	ARL13B	ADP-ribosylation factor-like protein 13B	Q3SXY8	FALSE	0	0.0977182	0.62985	0.363784	0.0307697	0.0158267	3.38001	FALSE	FALSE	Stable	Stable
ARL14EP	18.2179	18.6316	18.4645	17.4925	17.6103	18.0544	Q8N8R7	Q8N8R7	AL14E_HUMAN	ARL14EP	ARL14 effector protein	Q8N8R7	FALSE	0	-1.15539	-0.282499	-0.718942	0.0162064	0.00715443	-4.07221	FALSE	FALSE	Down	Stable
ARL15	19.5689	19.7335	19.6792	19.2921	19.5114	19.3287	Q9NXU5	Q9NXU5	ARL15_HUMAN	ARL15	ADP-ribosylation factor-like protein 15	Q9NXU5	FALSE	0	-0.468552	-0.0977813	-0.283167	0.0210742	0.00995868	-3.77599	FALSE	FALSE	Stable	Stable
ARL2	22.4442	22.505	22.4576	22.9076	22.8959	22.9516	P36404	P36404	ARL2_HUMAN	ARL2	ADP-ribosylation factor-like protein 2	P36404	FALSE	0	0.362579	0.536289	0.449434	0.00021106	1.9081e-05	12.7919	FALSE	FALSE	Stable	Stable
ARL2BP	22.2939	22.3069	22.3582	22.6276	22.5657	22.6284	Q9Y2Y0	Q9Y2Y0	AR2BP_HUMAN	ARL2BP	ADP-ribosylation factor-like protein 2-binding protein	Q9Y2Y0	FALSE	0	0.196228	0.378916	0.287572	0.00132908	0.000289608	7.78269	FALSE	FALSE	Stable	Stable
ARL3	24.6828	24.591	24.6446	24.4772	24.4837	24.4533	P36405	P36405	ARL3_HUMAN	ARL3	ADP-ribosylation factor-like protein 3	P36405	FALSE	0	-0.258876	-0.0772435	-0.16806	0.0106493	0.00420678	-4.57471	FALSE	FALSE	Stable	Stable
ARL5A	20.0053	20.4233	19.8265	19.8516	19.6623	19.7876	Q96KC2;Q9Y689	Q96KC2;Q9Y689	ARL5A_HUMAN;ARL5B_HUMAN	ARL5A;ARL5B	ADP-ribosylation factor-like protein 5B	Q96KC2	FALSE	0	-0.706198	0.0704051	-0.317897	0.135024	0.091413	-2.02386	FALSE	FALSE	Stable	Stable
ARL6	17.6914	17.7991	17.5944	17.5757	17.8346	17.6413	Q9H0F7	Q9H0F7	ARL6_HUMAN	ARL6	ADP-ribosylation factor-like protein 6	Q9H0F7	FALSE	0	-0.224074	0.20192	-0.011077	0.919879	0.902076	-0.128562	FALSE	FALSE	Stable	Stable
ARL6IP1	23.8408	23.6011	23.9464	24.1159	24.0579	24.0644	Q15041	Q15041	AR6P1_HUMAN	ARL6IP1	ADP-ribosylation factor-like protein 6-interacting protein 1	Q15041	FALSE	0	0.0583466	0.508317	0.283332	0.0402715	0.0219224	3.11319	FALSE	FALSE	Stable	Stable
ARL6IP4	21.0504	20.9802	20.8472	20.7467	21.029	20.8532	Q66PJ3	Q66PJ3	AR6P4_HUMAN	ARL6IP4	ADP-ribosylation factor-like protein 6-interacting protein 4	Q66PJ3	FALSE	0	-0.303654	0.137717	-0.0829687	0.460845	0.389982	-0.929404	FALSE	FALSE	Stable	Stable
ARL6IP5	25.2167	25.3363	24.882	24.9384	25.0047	25.0964	O75915	O75915	PRAF3_HUMAN	ARL6IP5	PRA1 family protein 3	O75915	FALSE	0	-0.435572	0.171922	-0.131825	0.396107	0.326221	-1.07288	FALSE	FALSE	Stable	Stable
ARL6IP6	20.7779	20.8612	20.5159	20.682	20.6425	20.4992	Q8N6S5	Q8N6S5	AR6P6_HUMAN	ARL6IP6	ADP-ribosylation factor-like protein 6-interacting protein 6	Q8N6S5	FALSE	0	-0.363236	0.14242	-0.110408	0.393147	0.323479	-1.07954	FALSE	FALSE	Stable	Stable
ARL8A	24.6291	24.5947	24.6315	24.3189	24.3121	24.4284	Q96BM9	Q96BM9;Q9NVJ2	ARL8A_HUMAN	ARL8A	ADP-ribosylation factor-like protein 8A	Q96BM9	FALSE	0	-0.372512	-0.158082	-0.265297	0.00343416	0.00101587	-6.11704	FALSE	FALSE	Stable	Stable
ARL8B	24.0727	24.2683	24.0177	24.0516	23.8596	24.1129	Q9NVJ2	Q9NVJ2	ARL8B_HUMAN	ARL8B	ADP-ribosylation factor-like protein 8B	Q9NVJ2	FALSE	0	-0.344209	0.121136	-0.111537	0.351263	0.282594	-1.18505	FALSE	FALSE	Stable	Stable
ARMC1	21.3893	21.4746	21.4904	21.4577	21.3481	21.4431	Q9NVT9	Q9NVT9	ARMC1_HUMAN	ARMC1	Armadillo repeat-containing protein 1	Q9NVT9	FALSE	0	-0.153732	0.0835206	-0.0351054	0.560867	0.493115	-0.731574	FALSE	FALSE	Stable	Stable
ARMC10	20.7886	20.6968	20.7659	20.7631	20.764	20.7375	Q8N2F6	Q8N2F6	ARM10_HUMAN	ARMC10	Armadillo repeat-containing protein 10	Q8N2F6	FALSE	0	-0.087378	0.096274	0.00444804	0.92568	0.908752	0.119748	FALSE	FALSE	Stable	Stable
ARMC5	18.8798	18.887	18.8739	18.5473	18.909	18.6891	Q96C12	Q96C12	ARMC5_HUMAN	ARMC5	Armadillo repeat-containing protein 5	Q96C12	FALSE	0	-0.39302	0.0628369	-0.165091	0.177173	0.12563	-1.79056	FALSE	FALSE	Stable	Stable
ARMC6	21.574	21.7214	21.6628	21.8469	21.7592	21.794	Q6NXE6	Q6NXE6	ARMC6_HUMAN	ARMC6	Armadillo repeat-containing protein 6	Q6NXE6	FALSE	0	0.0230898	0.271508	0.147299	0.048874	0.0275306	2.93164	FALSE	FALSE	Stable	Stable
ARMC8	20.8493	20.6711	20.7096	20.7623	20.7471	20.7623	Q8IUR7	Q8IUR7	ARMC8_HUMAN	ARMC8	Armadillo repeat-containing protein 8	Q8IUR7	FALSE	0	-0.118195	0.145849	0.0138267	0.840434	0.804717	0.258902	FALSE	FALSE	Stable	Stable
ARMC9	21.4919	21.4597	21.4659	20.849	20.8493	20.8107	Q7Z3E5	Q7Z3E5	ARMC9_HUMAN	ARMC9	LisH domain-containing protein ARMC9	Q7Z3E5	FALSE	0	-0.713507	-0.558779	-0.636143	4.36867e-05	1.39657e-06	-20.3274	TRUE	TRUE	Down	Down
ARMCX1	17.8729	18.4772	17.7051	18.7482	19.0046	18.7274	Q9P291	Q9P291	ARMX1_HUMAN	ARMCX1	Armadillo repeat-containing X-linked protein 1	Q9P291	FALSE	0	0.286805	1.32994	0.80837	0.0199863	0.00935097	3.83147	FALSE	FALSE	Up	Stable
ARMCX3	21.3739	21.3902	21.4506	21.5915	21.5571	21.5175	Q9UH62	Q9UH62	ARMX3_HUMAN	ARMCX3	Armadillo repeat-containing X-linked protein 3	Q9UH62	FALSE	0	0.0549587	0.246006	0.150482	0.018943	0.00871159	3.89438	FALSE	FALSE	Stable	Stable
ARMH3	20.1912	20.2923	20.3701	19.9214	20.1042	19.885	Q5T2E6	Q5T2E6	ARMD3_HUMAN	ARMH3	Armadillo-like helical domain-containing protein 3	Q5T2E6	FALSE	0	-0.50348	-0.125183	-0.314332	0.0156968	0.00687909	-4.10817	FALSE	FALSE	Stable	Stable
ARMT1	21.9292	21.9106	21.9587	22.1042	22.0983	22.1166	Q9H993	Q9H993	ARMT1_HUMAN	ARMT1	Damage-control phosphatase ARMT1	Q9H993	FALSE	0	0.0971465	0.249886	0.173516	0.00482147	0.001561	5.61673	FALSE	FALSE	Stable	Stable
ARNT	18.5845	18.8691	18.6979	18.359	18.4476	18.4186	P27540	P27540	ARNT_HUMAN	ARNT	Aryl hydrocarbon receptor nuclear translocator	P27540	FALSE	0	-0.50062	-0.116856	-0.308738	0.0175653	0.00794004	-3.97758	FALSE	FALSE	Stable	Stable
ARPC1A	22.1299	22.1506	22.1437	21.187	21.1292	21.0776	Q92747	Q92747	ARC1A_HUMAN	ARPC1A	Actin-related protein 2/3 complex subunit 1A	Q92747	FALSE	0	-1.10637	-0.91379	-1.01008	1.98839e-05	3.48256e-07	-25.9325	TRUE	TRUE	Down	Down
ARPC1B	24.6046	24.5949	24.4842	24.4708	24.3882	24.3838	O15143	O15143	ARC1B_HUMAN	ARPC1B	Actin-related protein 2/3 complex subunit 1B	O15143	FALSE	0	-0.267855	-0.0261247	-0.14699	0.0449433	0.0250502	-3.00642	FALSE	FALSE	Stable	Stable
ARPC2	25.4464	25.3975	25.4075	25.176	25.0109	25.1439	O15144	O15144	ARPC2_HUMAN	ARPC2	Actin-related protein 2/3 complex subunit 2	O15144	FALSE	0	-0.43599	-0.177724	-0.306857	0.00403588	0.00124689	-5.87439	FALSE	FALSE	Stable	Stable
ARPC3	25.0107	25.0063	24.9453	24.5944	24.6832	24.6173	O15145	O15145	ARPC3_HUMAN	ARPC3	Actin-related protein 2/3 complex subunit 3	O15145	FALSE	0	-0.454636	-0.256923	-0.355779	0.000806542	0.000141158	-8.89691	FALSE	FALSE	Stable	Stable
ARPC4	26.3556	26.3007	26.4146	26.1028	26.0523	26.1404	P59998	P59998	ARPC4_HUMAN	ARPC4	Actin-related protein 2/3 complex subunit 4	P59998	FALSE	0	-0.369049	-0.147866	-0.258458	0.00431105	0.00135577	-5.77737	FALSE	FALSE	Stable	Stable
ARPC5	25.3276	25.5979	25.5244	25.1354	25.0327	25.0831	O15511	O15511	ARPC5_HUMAN	ARPC5	Actin-related protein 2/3 complex subunit 5	O15511	FALSE	0	-0.589961	-0.209114	-0.399538	0.00658903	0.00231068	-5.18682	FALSE	FALSE	Stable	Stable
ARPC5L	23.9891	23.8735	23.9243	24.0902	24.1041	24.0766	Q9BPX5	Q9BPX5	ARP5L_HUMAN	ARPC5L	Actin-related protein 2/3 complex subunit 5-like protein	Q9BPX5	FALSE	0	0.0618781	0.260831	0.161354	0.0170767	0.00766198	4.00982	FALSE	FALSE	Stable	Stable
ARPIN	21.8158	22.0707	21.8139	21.0601	21.0865	21.0412	Q7Z6K5	Q7Z6K5	ARPIN_HUMAN	ARPIN	Arpin	Q7Z6K5	FALSE	0	-1.02857	-0.646543	-0.837558	0.000387572	4.78911e-05	-10.8396	TRUE	TRUE	Down	Down
ARPP19	20.0461	19.8382	19.7892	19.6346	19.5652	19.296	P56211	P56211	ARP19_HUMAN	ARPP19	cAMP-regulated phosphoprotein 19	P56211	FALSE	0	-0.669147	-0.116035	-0.392591	0.0271618	0.0135686	-3.50931	FALSE	FALSE	Stable	Stable
ARRB1	18.6927	16.2263	18.749	20.0002	20.0367	19.7848	P49407	P49407	ARRB1_HUMAN	ARRB1	Beta-arrestin-1	P49407	TRUE	1	0.328549	3.77392	2.05123	0.0482404	0.0271177	2.94356	FALSE	FALSE	Stable	Stable
ARRB2	20.2436	20.5414	20.3665	20.1454	19.9406	20.2553	P32121	P32121	ARRB2_HUMAN	ARRB2	Beta-arrestin-2	P32121	FALSE	0	-0.539658	-0.000499466	-0.270079	0.0809107	0.0496972	-2.47667	FALSE	FALSE	Stable	Stable
ARRDC1	18.5755	18.461	18.6832	18.8613	18.7195	18.9115	Q8N5I2	Q8N5I2	ARRD1_HUMAN	ARRDC1	Arrestin domain-containing protein 1	Q8N5I2	FALSE	0	0.0667868	0.448231	0.257509	0.032102	0.0166525	3.33776	FALSE	FALSE	Stable	Stable
ARSA	21.2744	21.3378	21.329	20.6188	20.7484	20.745	P15289	P15289	ARSA_HUMAN	ARSA	Arylsulfatase A	P15289	FALSE	0	-0.729115	-0.490247	-0.609681	0.000220768	2.05841e-05	-12.6194	TRUE	TRUE	Down	Down
ARSB	21.0097	20.9378	20.7902	20.9735	21.3117	20.9228	P15848	P15848	ARSB_HUMAN	ARSB	Arylsulfatase B	P15848	FALSE	0	-0.136301	0.449794	0.156747	0.30078	0.236169	1.32228	FALSE	FALSE	Stable	Stable
ARSK	16.8149	17.1443	17.473	16.9132	17.056	17.3466	Q6UWY0	Q6UWY0	ARSK_HUMAN	ARSK	Arylsulfatase K	Q6UWY0	FALSE	0	-0.515372	0.437781	-0.0387957	0.875517	0.847431	-0.20124	FALSE	FALSE	Stable	Stable
ARV1	17.0742	17.1711	17.495	17.5488	17.4937	17.0867	Q9H2C2	Q9H2C2	ARV1_HUMAN	ARV1	Protein ARV1	Q9H2C2	FALSE	0	-0.275027	0.534283	0.129628	0.529154	0.459782	0.791915	FALSE	FALSE	Stable	Stable
ARVCF	18.7919	18.7305	18.7763	18.8982	18.8426	18.9135	O00192	O00192	ARVC_HUMAN	ARVCF	Splicing regulator ARVCF	O00192	FALSE	0	0.0275294	0.209562	0.118546	0.0362087	0.0192211	3.21981	FALSE	FALSE	Stable	Stable
AS3MT	18.9514	18.9374	19.0062	19.3125	19.247	19.2287	Q9HBK9	Q9HBK9	AS3MT_HUMAN	AS3MT	Arsenite methyltransferase	Q9HBK9	FALSE	0	0.200287	0.395169	0.297728	0.00150592	0.000339438	7.5534	FALSE	FALSE	Stable	Stable
ASAH1	22.5872	22.5711	22.4776	22.8096	22.6147	22.6281	Q13510	Q13510	ASAH1_HUMAN	ASAH1	Acid ceramidase	Q13510	FALSE	0	-0.0242461	0.301904	0.138829	0.122946	0.0819218	2.10454	FALSE	FALSE	Stable	Stable
ASAP1	22.4061	22.461	22.4417	22.5077	22.5098	22.5506	Q9ULH1	Q9ULH1	ASAP1_HUMAN	ASAP1	Arf-GAP with SH3 domain, ANK repeat and PH domain-containing protein 1	Q9ULH1	FALSE	0	0.00393083	0.168922	0.0864262	0.0713727	0.0428005	2.58988	FALSE	FALSE	Stable	Stable
ASAP2	19.8103	19.8008	19.748	19.4512	19.2719	19.5408	O43150	O43150	ASAP2_HUMAN	ASAP2	Arf-GAP with SH3 domain, ANK repeat and PH domain-containing protein 2	O43150	FALSE	0	-0.546712	-0.183394	-0.365053	0.00776455	0.00284684	-4.96779	FALSE	FALSE	Stable	Stable
ASAP3	19.6868	19.7987	19.8094	19.8998	19.7731	19.8646	Q8TDY4	Q8TDY4	ASAP3_HUMAN	ASAP3	Arf-GAP with SH3 domain, ANK repeat and PH domain-containing protein 3	Q8TDY4	FALSE	0	-0.0513053	0.212919	0.080807	0.243997	0.18332	1.51206	FALSE	FALSE	Stable	Stable
ASB1	19.9633	19.6722	19.5202	19.4309	19.624	19.445	Q9Y576	Q9Y576	ASB1_HUMAN	ASB1	Ankyrin repeat and SOCS box protein 1	Q9Y576	FALSE	0	-0.52358	0.086378	-0.218601	0.180975	0.128862	-1.77193	FALSE	FALSE	Stable	Stable
ASB3	18.0313	17.858	17.7286	16.9997	15.9744	17.5429	Q9Y575	Q9Y575	ASB3_HUMAN	ASB3	Ankyrin repeat and SOCS box protein 3	Q9Y575	TRUE	1	-2.00075	-0.0664884	-1.03362	0.0672146	0.0399739	-2.64204	FALSE	FALSE	Stable	Stable
ASB6	20.2298	20.2098	20.0891	20.3518	20.4027	20.3418	Q9NWX5	Q9NWX5	ASB6_HUMAN	ASB6	Ankyrin repeat and SOCS box protein 6	Q9NWX5	FALSE	0	0.0684959	0.309918	0.189207	0.0192684	0.00890476	3.87484	FALSE	FALSE	Stable	Stable
ASB7	17.9876	18.294	18.1859	17.5684	15.8813	16.1132	Q9H672	Q9H672	ASB7_HUMAN	ASB7	Ankyrin repeat and SOCS box protein 7	Q9H672	TRUE	2	-2.74062	-0.529162	-1.63489	0.0236095	0.0114414	-3.65514	FALSE	FALSE	Stable	Stable
ASCC1	21.0557	20.9664	21.0104	20.8612	20.9292	20.813	Q8N9N2	Q8N9N2	ASCC1_HUMAN	ASCC1	Activating signal cointegrator 1 complex subunit 1	Q8N9N2	FALSE	0	-0.254937	-0.0311472	-0.143042	0.0383569	0.0206826	-3.16022	FALSE	FALSE	Stable	Stable
ASCC2	21.7569	21.73	21.7705	21.5879	21.576	21.5643	Q9H1I8	Q9H1I8	ASCC2_HUMAN	ASCC2	Activating signal cointegrator 1 complex subunit 2	Q9H1I8	FALSE	0	-0.25175	-0.101108	-0.176429	0.00427078	0.00134036	-5.79055	FALSE	FALSE	Stable	Stable
ASCC3	21.5014	21.4732	21.4694	21.4374	21.3202	21.3865	Q8N3C0	Q8N3C0	ASCC3_HUMAN	ASCC3	Activating signal cointegrator 1 complex subunit 3	Q8N3C0	FALSE	0	-0.200972	0.000977986	-0.0999973	0.0835329	0.0516151	-2.44815	FALSE	FALSE	Stable	Stable
ASDURF	20.7388	20.7893	20.8457	20.6449	20.8565	20.5026	L0R819	L0R819	ASURF_HUMAN	ASDURF	ASNSD1 upstream open reading frame protein	L0R819	FALSE	0	-0.355234	0.108717	-0.123258	0.303803	0.238916	-1.31353	FALSE	FALSE	Stable	Stable
ASF1A	20.1113	19.9003	19.7858	20.1468	20.145	20.1357	Q9Y294	Q9Y294	ASF1A_HUMAN	ASF1A	Histone chaperone ASF1A	Q9Y294	FALSE	0	0.00143662	0.418638	0.210037	0.079745	0.0488843	2.48911	FALSE	FALSE	Stable	Stable
ASF1B	18.7688	19.2734	19.1853	18.7799	18.6439	18.7032	Q9NVP2	Q9NVP2	ASF1B_HUMAN	ASF1B	Histone chaperone ASF1B	Q9NVP2	FALSE	0	-0.704852	-0.0287735	-0.366813	0.0643723	0.0379187	-2.68251	FALSE	FALSE	Stable	Stable
ASH2L	22.1933	22.156	22.205	22.3487	22.2945	22.3653	Q9UBL3	Q9UBL3	ASH2L_HUMAN	ASH2L	Set1/Ash2 histone methyltransferase complex subunit ASH2	Q9UBL3	FALSE	0	0.0634102	0.239389	0.1514	0.0138637	0.00588114	4.25362	FALSE	FALSE	Stable	Stable
ASL	21.1625	21.2052	21.2728	20.5917	20.564	20.5201	P04424	P04424	ARLY_HUMAN	ASL	Argininosuccinate lyase	P04424	FALSE	0	-0.760198	-0.549551	-0.654875	0.000111041	6.80445e-06	-15.3709	TRUE	TRUE	Down	Down
ASMTL	19.0853	19.148	18.9743	19.352	19.3697	19.2	O95671	O95671	ASML_HUMAN	ASMTL	Probable bifunctional dTTP/UTP pyrophosphatase/methyltransferase protein	O95671	FALSE	0	0.0702937	0.405801	0.238047	0.0271907	0.0135901	3.50797	FALSE	FALSE	Stable	Stable
ASNS	22.2612	22.2498	22.3167	22.8322	22.8833	22.8845	P08243	P08243	ASNS_HUMAN	ASNS	Asparagine synthetase [glutamine-hydrolyzing]	P08243	FALSE	0	0.501556	0.679937	0.590747	9.04173e-05	4.76248e-06	16.3737	TRUE	TRUE	Up	Up
ASNSD1	17.9955	17.6794	17.8218	17.9876	18.0905	17.9909	Q9NWL6	Q9NWL6	ASND1_HUMAN	ASNSD1	Asparagine synthetase domain-containing protein 1	Q9NWL6	FALSE	0	-0.0218185	0.40334	0.190761	0.108152	0.0702254	2.21836	FALSE	FALSE	Stable	Stable
ASPH	24.2916	24.2558	24.2549	24.2921	24.4003	24.2904	Q12797	Q12797	ASPH_HUMAN	ASPH	Aspartyl/asparaginyl beta-hydroxylase	Q12797	FALSE	0	-0.0452157	0.165512	0.0601481	0.272579	0.209863	1.41122	FALSE	FALSE	Stable	Stable
ASPHD1	18.1947	18.0761	18.22	18.3936	18.3616	18.4437	Q5U4P2	Q5U4P2	ASPH1_HUMAN	ASPHD1	Aspartate beta-hydroxylase domain-containing protein 1	Q5U4P2	FALSE	0	0.110929	0.361154	0.236042	0.00985448	0.0038428	4.66394	FALSE	FALSE	Stable	Stable
ASPM	19.5011	19.417	19.4139	19.4703	19.4957	19.3164	Q8IZT6	Q8IZT6	ASPM_HUMAN	ASPM	Abnormal spindle-like microcephaly-associated protein	Q8IZT6	FALSE	0	-0.163743	0.130652	-0.0165454	0.829042	0.79082	-0.277869	FALSE	FALSE	Stable	Stable
ASPSCR1	20.3963	20.419	20.3631	20.9466	20.8735	20.8973	Q9BZE9	Q9BZE9	ASPC1_HUMAN	ASPSCR1	Tether containing UBX domain for GLUT4	Q9BZE9	FALSE	0	0.423779	0.602209	0.512994	0.000145999	1.05668e-05	14.2147	TRUE	TRUE	Up	Up
ASRGL1	19.3928	19.135	19.1836	18.6429	18.5708	18.5836	Q7L266	Q7L266	ASGL1_HUMAN	ASRGL1	Isoaspartyl peptidase/L-asparaginase	Q7L266	FALSE	0	-0.821093	-0.454901	-0.637997	0.000904589	0.000168108	-8.61398	TRUE	TRUE	Down	Down
ASS1	20.8897	20.5477	20.6848	20.5509	20.3182	20.341	P00966	P00966	ASSY_HUMAN	ASS1	Argininosuccinate synthase	P00966	FALSE	0	-0.568783	-0.0393566	-0.30407	0.0540034	0.0309555	-2.83963	FALSE	FALSE	Stable	Stable
ASXL1	17.0855	17.0088	16.7216	17.1977	17.3362	17.2318	Q8IXJ9	Q8IXJ9	ASXL1_HUMAN	ASXL1	Polycomb group protein ASXL1	Q8IXJ9	FALSE	0	0.0629861	0.570185	0.316586	0.0414657	0.022674	3.08608	FALSE	FALSE	Stable	Stable
ASXL2	20.2882	20.4743	20.4899	20.2689	20.2051	20.3414	Q76L83	Q76L83	ASXL2_HUMAN	ASXL2	Putative Polycomb group protein ASXL2	Q76L83	FALSE	0	-0.316834	0.0254268	-0.145704	0.122929	0.0818945	-2.10478	FALSE	FALSE	Stable	Stable
ATAD1	22.1907	22.2059	22.2324	22.2159	22.2432	22.2845	Q8NBU5	Q8NBU5	ATAD1_HUMAN	ATAD1	Outer mitochondrial transmembrane helix translocase	Q8NBU5	FALSE	0	-0.0466572	0.122976	0.0381593	0.379615	0.31032	1.1122	FALSE	FALSE	Stable	Stable
ATAD2	22.1608	22.2659	22.203	21.4922	21.4078	21.4894	Q6PL18	Q6PL18	ATAD2_HUMAN	ATAD2	ATPase family AAA domain-containing protein 2	Q6PL18	FALSE	0	-0.856667	-0.636785	-0.746726	8.26975e-05	4.13144e-06	-16.7905	TRUE	TRUE	Down	Down
ATAD3A	23.5153	23.5306	23.4398	23.6939	23.7098	23.7612	Q9NVI7	Q9NVI7	ATD3A_HUMAN	ATAD3A	ATPase family AAA domain-containing protein 3A	Q9NVI7	FALSE	0	0.126577	0.326276	0.226427	0.00484491	0.00157608	5.60589	FALSE	FALSE	Stable	Stable
ATAD3B	22.4751	22.4269	22.4344	22.7029	22.7002	22.7208	Q5T9A4	Q5T9A4	ATD3B_HUMAN	ATAD3B	ATPase family AAA domain-containing protein 3B	Q5T9A4	FALSE	0	0.185037	0.340001	0.262519	0.00100343	0.000195518	8.37577	FALSE	FALSE	Stable	Stable
ATAD5	19.4485	19.4132	19.2194	19.4422	19.4936	19.4838	Q96QE3	Q96QE3	ATAD5_HUMAN	ATAD5	ATPase family AAA domain-containing protein 5	Q96QE3	FALSE	0	-0.0528287	0.278552	0.112862	0.200429	0.145269	1.68389	FALSE	FALSE	Stable	Stable
ATAT1	19.0995	19.0227	19.1806	19.271	19.1697	19.227	Q5SQI0	Q5SQI0	ATAT_HUMAN	ATAT1	Alpha-tubulin N-acetyltransferase 1	Q5SQI0	FALSE	0	-0.010109	0.253316	0.121604	0.100575	0.0644247	2.28235	FALSE	FALSE	Stable	Stable
ATE1	20.7501	20.7157	20.7211	20.7103	20.7846	20.8021	O95260	O95260	ATE1_HUMAN	ATE1	Arginyl-tRNA--protein transferase 1	O95260	FALSE	0	-0.056733	0.13007	0.0366687	0.440895	0.370772	0.97052	FALSE	FALSE	Stable	Stable
ATF2	20.6224	20.6915	20.6385	20.2124	20.4243	20.424	P15336	P15336	ATF2_HUMAN	ATF2	Cyclic AMP-dependent transcription factor ATF-2	P15336	FALSE	0	-0.464272	-0.130351	-0.297311	0.0122305	0.00502766	-4.40211	FALSE	FALSE	Stable	Stable
ATF3	15.8142	15.9796	16.6349	16.329	16.2829	16.5711	P18847	P18847	ATF3_HUMAN	ATF3	Cyclic AMP-dependent transcription factor ATF-3	P18847	FALSE	0	-0.301239	0.804045	0.251403	0.374756	0.305451	1.12458	FALSE	FALSE	Stable	Stable
ATF6	18.4616	18.4367	18.5962	18.6268	18.1953	18.3637	P18850	P18850	ATF6A_HUMAN	ATF6	Cyclic AMP-dependent transcription factor ATF-6 alpha	P18850	FALSE	0	-0.389667	0.183887	-0.10289	0.482087	0.410628	-0.886933	FALSE	FALSE	Stable	Stable
ATF6B	19.3151	19.4181	19.1943	19.5577	20.1489	19.9179	Q99941	Q99941	ATF6B_HUMAN	ATF6B	Cyclic AMP-dependent transcription factor ATF-6 beta	Q99941	FALSE	0	0.180599	0.950686	0.565643	0.0241735	0.0117583	3.63159	FALSE	FALSE	Stable	Stable
ATF7	16.4436	17.1137	15.9322	16.9338	16.8753	16.3377	P17544	P17544	ATF7_HUMAN	ATF7	Cyclic AMP-dependent transcription factor ATF-7	P17544	TRUE	1	-0.589842	1.02811	0.219134	0.594469	0.529012	0.669635	FALSE	FALSE	Stable	Stable
ATF7IP	20.405	20.3972	20.4331	20.409	20.498	20.4375	Q6VMQ6	Q6VMQ6	MCAF1_HUMAN	ATF7IP	Activating transcription factor 7-interacting protein 1	Q6VMQ6	FALSE	0	-0.0547046	0.127572	0.0364336	0.432783	0.362724	0.988247	FALSE	FALSE	Stable	Stable
ATG101	21.6285	21.4827	21.3578	21.7866	21.7187	21.7124	Q9BSB4	Q9BSB4	ATGA1_HUMAN	ATG101	Autophagy-related protein 101	Q9BSB4	FALSE	0	0.0672072	0.431905	0.249556	0.0306979	0.015766	3.38321	FALSE	FALSE	Stable	Stable
ATG12	21.8123	21.8128	21.6551	21.6417	21.5901	21.6794	O94817	O94817	ATG12_HUMAN	ATG12	Ubiquitin-like protein ATG12	O94817	FALSE	0	-0.262307	0.0163316	-0.122988	0.112679	0.0737312	-2.1823	FALSE	FALSE	Stable	Stable
ATG13	19.826	19.8109	19.7709	20.0779	20.1306	20.0507	O75143	O75143	ATG13_HUMAN	ATG13	Autophagy-related protein 13	O75143	FALSE	0	0.192402	0.375264	0.283833	0.00141201	0.000312038	7.67423	FALSE	FALSE	Stable	Stable
ATG16L1	21.7701	21.7168	21.6956	21.4347	21.4206	21.4705	Q676U5	Q676U5	A16L1_HUMAN	ATG16L1	Autophagy-related protein 16-1	Q676U5	FALSE	0	-0.374452	-0.196691	-0.285571	0.00122947	0.000259828	-7.94277	FALSE	FALSE	Stable	Stable
ATG2A	19.9101	19.9581	19.9542	19.7708	19.9126	19.6787	Q2TAZ0	Q2TAZ0	ATG2A_HUMAN	ATG2A	Autophagy-related protein 2 homolog A	Q2TAZ0	FALSE	0	-0.313251	0.00631152	-0.15347	0.0907741	0.0569428	-2.37444	FALSE	FALSE	Stable	Stable
ATG2B	19.9533	19.7645	19.841	19.3688	19.5955	19.6342	Q96BY7	Q96BY7	ATG2B_HUMAN	ATG2B	Autophagy-related protein 2 homolog B	Q96BY7	FALSE	0	-0.536277	-0.103886	-0.320081	0.023503	0.0113777	-3.65997	FALSE	FALSE	Stable	Stable
ATG3	22.4708	22.824	22.8038	22.886	22.4536	22.8379	Q9NT62	Q9NT62	ATG3_HUMAN	ATG3	Ubiquitin-like-conjugating enzyme ATG3	Q9NT62	FALSE	0	-0.347906	0.400572	0.0263328	0.892222	0.867863	0.173945	FALSE	FALSE	Stable	Stable
ATG4A	15.2335	16.0536	15.1796	15.4247	15.0996	16.0264	Q8WYN0	Q8WYN0	ATG4A_HUMAN	ATG4A	Cysteine protease ATG4A	Q8WYN0	TRUE	1	-0.782757	0.838747	0.0279949	0.947056	0.934866	0.0853601	FALSE	FALSE	Stable	Stable
ATG4B	19.3124	18.7812	18.9518	19.1889	19.1513	19.1002	Q9Y4P1	Q9Y4P1	ATG4B_HUMAN	ATG4B	Cysteine protease ATG4B	Q9Y4P1	FALSE	0	-0.202598	0.465974	0.131688	0.439557	0.36925	0.973848	FALSE	FALSE	Stable	Stable
ATG5	21.0572	21.0062	21.03	20.8584	20.8725	20.7925	Q9H1Y0	Q9H1Y0	ATG5_HUMAN	ATG5	Autophagy protein 5	Q9H1Y0	FALSE	0	-0.281525	-0.0984407	-0.189983	0.00684544	0.00243668	-5.13047	FALSE	FALSE	Stable	Stable
ATG7	21.4046	21.4187	21.4454	22.0022	21.9462	21.9406	O95352	O95352	ATG7_HUMAN	ATG7	Ubiquitin-like modifier-activating enzyme ATG7	O95352	FALSE	0	0.455705	0.624511	0.540108	0.000100111	5.78552e-06	15.8193	TRUE	TRUE	Up	Up
ATG9A	21.2838	21.2629	21.3408	21.1012	21.1229	21.1254	Q7Z3C6	Q7Z3C6	ATG9A_HUMAN	ATG9A	Autophagy-related protein 9A	Q7Z3C6	FALSE	0	-0.265552	-0.0931854	-0.179369	0.00678133	0.00240338	-5.14503	FALSE	FALSE	Stable	Stable
ATIC	24.7819	24.8231	24.8276	24.4961	24.4427	24.3922	P31939	P31939	PUR9_HUMAN	ATIC	Bifunctional purine biosynthesis protein ATIC	P31939	FALSE	0	-0.465196	-0.269239	-0.367218	0.000693003	0.000113255	-9.26522	FALSE	FALSE	Stable	Stable
ATL1	20.0215	19.7534	20.0539	19.6865	19.6098	19.5393	Q8WXF7	Q8WXF7	ATLA1_HUMAN	ATL1	Atlastin-1	Q8WXF7	FALSE	0	-0.557039	-0.105171	-0.331105	0.0243691	0.0118785	-3.62283	FALSE	FALSE	Stable	Stable
ATL2	21.1489	21.2675	21.2734	21.616	21.6512	21.7019	Q8NHH9	Q8NHH9	ATLA2_HUMAN	ATL2	Atlastin-2	Q8NHH9	FALSE	0	0.30599	0.54685	0.42642	0.000856268	0.000154161	8.75322	FALSE	FALSE	Stable	Stable
ATL3	23.1308	23.1106	23.1688	22.5573	22.528	22.6631	Q6DD88	Q6DD88	ATLA3_HUMAN	ATL3	Atlastin-3	Q6DD88	FALSE	0	-0.669033	-0.438748	-0.553891	0.00027573	2.8656e-05	-11.8919	TRUE	TRUE	Down	Down
ATM	20.2338	20.2948	20.1332	20.6515	20.6811	20.6819	Q13315	Q13315	ATM_HUMAN	ATM	Serine-protein kinase ATM	Q13315	FALSE	0	0.329556	0.572226	0.450891	0.000717441	0.000118634	9.18651	FALSE	FALSE	Stable	Stable
ATN1	20.4856	20.5584	20.2495	20.7144	20.444	20.1698	P54259	P54259	ATN1_HUMAN	ATN1	Atrophin-1	P54259	FALSE	0	-0.371438	0.394599	0.0115805	0.953384	0.942948	0.0747433	FALSE	FALSE	Stable	Stable
ATOX1	21.8736	21.6946	21.8016	21.9694	22.0859	22.0885	O00244	O00244	ATOX1_HUMAN	ATOX1	Copper transport protein ATOX1	O00244	FALSE	0	0.106664	0.40938	0.258022	0.0143046	0.00613449	4.21419	FALSE	FALSE	Stable	Stable
ATP11A	18.3851	18.4912	18.5056	18.3227	18.2562	18.2125	P98196	P98196	AT11A_HUMAN	ATP11A	Phospholipid-transporting ATPase IH	P98196	FALSE	0	-0.320732	-0.0728703	-0.196801	0.0184312	0.00841211	-3.92566	FALSE	FALSE	Stable	Stable
ATP11B	20.1974	20.1647	20.1871	20.6441	20.6121	20.5427	Q9Y2G3	Q9Y2G3	AT11B_HUMAN	ATP11B	Phospholipid-transporting ATPase IF	Q9Y2G3	FALSE	0	0.321377	0.511855	0.416616	0.000391348	4.85206e-05	10.814	FALSE	FALSE	Stable	Stable
ATP11C	20.146	20.1709	20.199	20.6096	20.662	20.6457	Q8NB49	Q8NB49	AT11C_HUMAN	ATP11C	Phospholipid-transporting ATPase IG	Q8NB49	FALSE	0	0.384137	0.5501	0.467119	0.000158146	1.19061e-05	13.9159	FALSE	FALSE	Stable	Stable
ATP13A1	21.4833	21.4221	21.509	21.1166	21.108	21.0863	Q9HD20	Q9HD20	AT131_HUMAN	ATP13A1	Endoplasmic reticulum transmembrane helix translocase	Q9HD20	FALSE	0	-0.457495	-0.278102	-0.367799	0.000495973	6.92775e-05	-10.1368	FALSE	FALSE	Stable	Stable
ATP13A3	19.8407	20.042	19.7696	20.7963	20.8535	20.8791	Q9H7F0	Q9H7F0	AT133_HUMAN	ATP13A3	Polyamine-transporting ATPase 13A3	Q9H7F0	FALSE	0	0.769995	1.14773	0.958863	0.000224518	2.1223e-05	12.5505	TRUE	TRUE	Up	Up
ATP1A1	26.3868	26.4506	26.3914	26.6414	26.6111	26.5829	P05023	P05023	AT1A1_HUMAN	ATP1A1	Sodium/potassium-transporting ATPase subunit alpha-1	P05023	FALSE	0	0.113468	0.290977	0.202223	0.00476874	0.00153929	5.63254	FALSE	FALSE	Stable	Stable
ATP1B1	22.9154	22.8062	22.7794	22.9049	22.9106	22.8163	P05026	P05026	AT1B1_HUMAN	ATP1B1	Sodium/potassium-transporting ATPase subunit beta-1	P05026	FALSE	0	-0.0835688	0.170794	0.0436125	0.501304	0.430418	0.847718	FALSE	FALSE	Stable	Stable
ATP1B3	23.6328	23.6942	23.7623	24.0853	24.0781	23.9927	P54709	P54709	AT1B3_HUMAN	ATP1B3	Sodium/potassium-transporting ATPase subunit beta-3	P54709	FALSE	0	0.234883	0.476347	0.355615	0.00174226	0.00041195	7.2815	FALSE	FALSE	Stable	Stable
ATP23	17.7458	17.927	17.7808	18.0959	17.9234	18.0293	Q9Y6H3	Q9Y6H3	ATP23_HUMAN	ATP23	Mitochondrial inner membrane protease ATP23 homolog	Q9Y6H3	FALSE	0	0.0290148	0.367606	0.19831	0.0507582	0.0288142	2.89577	FALSE	FALSE	Stable	Stable
ATP2A2	24.6184	24.6005	24.5832	24.9728	24.93	24.9494	P16615	P16615	AT2A2_HUMAN	ATP2A2	Sarcoplasmic/endoplasmic reticulum calcium ATPase 2	P16615	FALSE	0	0.272776	0.427215	0.349995	0.000345565	3.98746e-05	11.2046	FALSE	FALSE	Stable	Stable
ATP2B1	22.3608	22.3164	22.2958	21.9512	21.9104	21.8103	P20020	P20020	AT2B1_HUMAN	ATP2B1	Plasma membrane calcium-transporting ATPase 1	P20020	FALSE	0	-0.551508	-0.315901	-0.433705	0.000742601	0.000124803	-9.10121	FALSE	FALSE	Stable	Stable
ATP2B4	23.1438	23.1314	23.1695	22.9232	22.7382	22.9396	P23634	P20020;P23634	AT2B4_HUMAN	ATP2B4	Plasma membrane calcium-transporting ATPase 4	P23634	FALSE	0	-0.43325	-0.129166	-0.281208	0.0106569	0.00421749	-4.57222	FALSE	FALSE	Stable	Stable
ATP2C1	20.3065	20.2052	20.2357	20.3714	20.3227	20.2708	P98194	P98194	AT2C1_HUMAN	ATP2C1	Calcium-transporting ATPase type 2C member 1	P98194	FALSE	0	-0.0383062	0.183268	0.072481	0.216463	0.159009	1.61733	FALSE	FALSE	Stable	Stable
ATP5F1A	27.6074	27.6227	27.6215	27.1527	27.0486	27.112	P25705	P25705	ATPA_HUMAN	ATP5F1A	ATP synthase subunit alpha, mitochondrial	P25705	FALSE	0	-0.606974	-0.418518	-0.512746	0.000174518	1.43995e-05	-13.4519	TRUE	TRUE	Down	Down
ATP5F1B	27.0293	26.9429	27.0013	26.5367	26.5829	26.5822	P06576	P06576	ATPB_HUMAN	ATP5F1B	ATP synthase subunit beta, mitochondrial	P06576	FALSE	0	-0.516743	-0.331057	-0.4239	0.000336335	3.82898e-05	-11.287	FALSE	FALSE	Stable	Stable
ATP5F1C	23.8256	23.6323	23.6058	23.3913	23.2908	23.3851	P36542	P36542	ATPG_HUMAN	ATP5F1C	ATP synthase subunit gamma, mitochondrial	P36542	FALSE	0	-0.504599	-0.159764	-0.332182	0.00910358	0.00348081	-4.76276	FALSE	FALSE	Stable	Stable
ATP5F1D	17.9023	18.2597	18.003	17.9174	18.1759	17.6116	P30049	P30049	ATPD_HUMAN	ATP5F1D	ATP synthase subunit delta, mitochondrial	P30049	FALSE	0	-0.560606	0.253878	-0.153364	0.460034	0.389237	-0.930969	FALSE	FALSE	Stable	Stable
ATP5F1E	17.0873	17.3521	17.3287	16.8513	16.8622	16.0918	P56381;Q5VTU8	P56381;Q5VTU8	AT5EL_HUMAN;ATP5E_HUMAN	ATP5F1E;ATP5F1EP2	ATP synthase subunit epsilon, mitochondrial	P56381	FALSE	0	-1.21232	-0.0962572	-0.654288	0.0505928	0.0287138	-2.89851	FALSE	FALSE	Stable	Stable
ATP5ME	23.854	23.8499	23.9784	23.3386	23.2674	23.3324	P56385	P56385	ATP5I_HUMAN	ATP5ME	ATP synthase subunit e, mitochondrial	P56385	FALSE	0	-0.702224	-0.460361	-0.581293	0.000276221	2.87782e-05	-11.8828	TRUE	TRUE	Down	Down
ATP5MF	26.258	26.4001	26.296	25.8145	25.7525	25.8051	P56134	P56134	ATPK_HUMAN	ATP5MF	ATP synthase subunit f, mitochondrial	P56134	FALSE	0	-0.646118	-0.408595	-0.527357	0.000370537	4.46648e-05	-10.9773	TRUE	TRUE	Down	Down
ATP5MG	23.26	23.146	23.156	22.5771	22.5894	22.6217	O75964	O75964	ATP5L_HUMAN	ATP5MG	ATP synthase subunit g, mitochondrial	O75964	FALSE	0	-0.697406	-0.485132	-0.591269	0.000162285	1.26234e-05	-13.7715	TRUE	TRUE	Down	Down
ATP5MK	23.0678	22.9283	22.9849	22.4223	22.5932	22.4076	Q96IX5	Q96IX5	ATPMK_HUMAN	ATP5MK	ATP synthase membrane subunit K, mitochondrial	Q96IX5	FALSE	0	-0.683335	-0.355245	-0.51929	0.00130069	0.000281275	-7.82549	TRUE	TRUE	Down	Down
ATP5PB	23.5732	23.5746	23.5008	23.1674	22.9684	23.0239	P24539	P24539	AT5F1_HUMAN	ATP5PB	ATP synthase F(0) complex subunit B1, mitochondrial	P24539	FALSE	0	-0.645682	-0.34687	-0.496276	0.00107762	0.000217468	-8.21144	FALSE	FALSE	Stable	Stable
ATP5PD	24.1548	24.0969	24.1701	23.7211	23.7792	23.6257	O75947	O75947	ATP5H_HUMAN	ATP5PD	ATP synthase subunit d, mitochondrial	O75947	FALSE	0	-0.556409	-0.307529	-0.431969	0.000915689	0.000171581	-8.58139	FALSE	FALSE	Stable	Stable
ATP5PF	19.382	19.1518	19.5069	19.0673	19.0172	16.2189	P18859	P18859	ATP5J_HUMAN	ATP5PF	ATP synthase-coupling factor 6, mitochondrial	P18859	TRUE	1	-3.19825	0.706666	-1.24579	0.226049	0.167856	-1.57735	FALSE	FALSE	Stable	Stable
ATP5PO	24.7623	24.7382	24.7345	24.2061	24.1799	24.2121	P48047	P48047	ATPO_HUMAN	ATP5PO	ATP synthase subunit O, mitochondrial	P48047	FALSE	0	-0.620545	-0.470695	-0.54562	6.52373e-05	2.78417e-06	-18.0023	TRUE	TRUE	Down	Down
ATP6AP1	22.635	22.528	22.6364	22.3827	22.3793	22.3346	Q15904	Q15904	VAS1_HUMAN	ATP6AP1	V-type proton ATPase subunit S1	Q15904	FALSE	0	-0.340936	-0.127647	-0.234291	0.00549488	0.00184413	-5.43102	FALSE	FALSE	Stable	Stable
ATP6AP2	20.5592	20.5035	20.6492	20.1272	20.1471	20.0998	O75787	O75787	RENR_HUMAN	ATP6AP2	Renin receptor	O75787	FALSE	0	-0.561331	-0.330543	-0.445937	0.000620741	9.58436e-05	-9.55333	FALSE	FALSE	Stable	Stable
ATP6V0A1	22.0597	22.0453	22.0462	22.5993	22.6499	22.6029	Q93050	Q93050	VPP1_HUMAN	ATP6V0A1	V-type proton ATPase 116 kDa subunit a 1	Q93050	FALSE	0	0.488864	0.645057	0.566961	6.57024e-05	2.83333e-06	17.9468	TRUE	TRUE	Up	Up
ATP6V0A2	21.6454	21.5494	21.5417	21.8379	21.6955	21.607	Q9Y487	Q9Y487	VPP2_HUMAN	ATP6V0A2	V-type proton ATPase 116 kDa subunit a 2	Q9Y487	FALSE	0	-0.0350624	0.304341	0.134639	0.145229	0.0995375	1.96132	FALSE	FALSE	Stable	Stable
ATP6V0D1	24.1399	24.1374	24.1841	24.4447	24.4045	24.4137	P61421	P61421	VA0D1_HUMAN	ATP6V0D1	V-type proton ATPase subunit d 1	P61421	FALSE	0	0.186647	0.347671	0.267159	0.00108219	0.000218669	8.20301	FALSE	FALSE	Stable	Stable
ATP6V1A	24.015	24.0266	24.0398	24.3271	24.2649	24.2869	P38606	P38606	VATA_HUMAN	ATP6V1A	V-type proton ATPase catalytic subunit A	P38606	FALSE	0	0.185191	0.346466	0.265828	0.00111235	0.000226482	8.14944	FALSE	FALSE	Stable	Stable
ATP6V1B2	23.3428	23.4	23.2995	23.6929	23.6777	23.7128	P21281	P21281	VATB2_HUMAN	ATP6V1B2	V-type proton ATPase subunit B, brain isoform	P21281	FALSE	0	0.252653	0.441433	0.347043	0.000746265	0.000125707	9.08912	FALSE	FALSE	Stable	Stable
ATP6V1C1	22.5138	22.6651	22.6225	22.9664	22.9999	22.9602	P21283	P21283	VATC1_HUMAN	ATP6V1C1	V-type proton ATPase subunit C 1	P21283	FALSE	0	0.256095	0.493876	0.374985	0.00131687	0.000286778	7.79706	FALSE	FALSE	Stable	Stable
ATP6V1E1	24.0411	24.0115	24.0349	24.2804	24.2835	24.3106	P36543	P36543	VATE1_HUMAN	ATP6V1E1	V-type proton ATPase subunit E 1	P36543	FALSE	0	0.187416	0.337243	0.262329	0.000889417	0.00016368	8.65668	FALSE	FALSE	Stable	Stable
ATP6V1F	22.4599	22.5393	22.5919	22.4713	22.7438	22.6552	Q16864	Q16864	VATF_HUMAN	ATP6V1F	V-type proton ATPase subunit F	Q16864	FALSE	0	-0.10305	0.289219	0.0930843	0.355583	0.286939	1.17324	FALSE	FALSE	Stable	Stable
ATP6V1G1	23.5687	23.4201	23.4196	23.7573	23.8026	23.7763	O75348	O75348	VATG1_HUMAN	ATP6V1G1	V-type proton ATPase subunit G 1	O75348	FALSE	0	0.182509	0.436027	0.309268	0.00363042	0.00109123	6.03145	FALSE	FALSE	Stable	Stable
ATP6V1G2	16.1679	15.2228	15.6626	15.768	16.0597	15.8016	O95670	O95670	VATG2_HUMAN	ATP6V1G2	V-type proton ATPase subunit G 2	O95670	FALSE	0	-0.405921	0.789915	0.191997	0.528137	0.458761	0.79381	FALSE	FALSE	Stable	Stable
ATP6V1H	21.4416	21.465	21.4544	21.8252	21.7372	21.6851	Q9UI12	Q9UI12	VATH_HUMAN	ATP6V1H	V-type proton ATPase subunit H	Q9UI12	FALSE	0	0.185223	0.40584	0.295532	0.00252359	0.000675665	6.62307	FALSE	FALSE	Stable	Stable
ATP7A	19.3356	19.2474	19.3761	18.6138	18.6352	18.8248	Q04656	Q04656	ATP7A_HUMAN	ATP7A	Copper-transporting ATPase 1	Q04656	FALSE	0	-0.801866	-0.45501	-0.628438	0.000786591	0.000136028	-8.9579	TRUE	TRUE	Down	Down
ATP8B1	18.698	18.8829	18.9245	19.5832	19.4847	19.2429	O43520	O43520	AT8B1_HUMAN	ATP8B1	Phospholipid-transporting ATPase IC	O43520	FALSE	0	0.339478	0.864176	0.601827	0.00464951	0.00148796	5.67096	TRUE	TRUE	Up	Up
ATPAF1	21.6815	21.6922	21.5875	22.3407	22.3746	22.4093	Q5TC12	Q5TC12	ATPF1_HUMAN	ATPAF1	ATP synthase mitochondrial F1 complex assembly factor 1	Q5TC12	FALSE	0	0.615192	0.827133	0.721163	8.2228e-05	4.08601e-06	16.8234	TRUE	TRUE	Up	Up
ATPAF2	21.3519	21.2264	21.2963	21.5394	21.5597	21.4524	Q8N5M1	Q8N5M1	ATPF2_HUMAN	ATPAF2	ATP synthase mitochondrial F1 complex assembly factor 2	Q8N5M1	FALSE	0	0.102874	0.348353	0.225613	0.0109009	0.00434069	4.54407	FALSE	FALSE	Stable	Stable
ATR	20.4172	20.3526	20.4423	21.5497	21.5812	21.563	Q13535	Q13535	ATR_HUMAN	ATR	Serine/threonine-protein kinase ATR	Q13535	FALSE	0	1.06977	1.25146	1.16062	1.06232e-05	1.12702e-07	31.5839	TRUE	TRUE	Up	Up
ATRAID	19.0401	18.9555	19.0463	19.351	19.2146	19.2647	Q6UW56	Q6UW56	ARAID_HUMAN	ATRAID	All-trans retinoic acid-induced differentiation factor	Q6UW56	FALSE	0	0.139214	0.38627	0.262742	0.00625055	0.00216183	5.25809	FALSE	FALSE	Stable	Stable
ATRIP	15.9335	16.0115	15.8514	16.9347	16.899	17.0646	Q8WXE1	Q8WXE1	ATRIP_HUMAN	ATRIP	ATR-interacting protein	Q8WXE1	FALSE	0	0.876825	1.19105	1.03394	9.22007e-05	4.93954e-06	16.2683	TRUE	TRUE	Up	Up
ATRN	19.9598	19.9939	20.0994	19.5644	19.7233	19.9143	O75882	O75882	ATRN_HUMAN	ATRN	Attractin	O75882	FALSE	0	-0.519879	-0.0474546	-0.283667	0.0468801	0.0262686	-2.96873	FALSE	FALSE	Stable	Stable
ATRX	21.9749	21.9496	22.0094	22.0459	21.9275	21.9015	P46100	P46100	ATRX_HUMAN	ATRX	Transcriptional regulator ATRX	P46100	FALSE	0	-0.140274	0.100889	-0.0196929	0.750872	0.700975	-0.403732	FALSE	FALSE	Stable	Stable
ATXN1	20.0729	19.8462	20.0846	19.247	19.0253	18.8157	P54253	P54253	ATX1_HUMAN	ATXN1	Ataxin-1	P54253	FALSE	0	-1.2822	-0.661591	-0.971893	0.00135949	0.000297634	-7.74279	TRUE	TRUE	Down	Down
ATXN10	22.8606	22.7791	22.8236	22.5871	22.5522	22.6153	Q9UBB4	Q9UBB4	ATX10_HUMAN	ATXN10	Ataxin-10	Q9UBB4	FALSE	0	-0.329199	-0.143196	-0.236198	0.0031141	0.000889514	-6.27841	FALSE	FALSE	Stable	Stable
ATXN1L	19.3741	19.4819	19.3546	19.1381	19.3944	19.0256	P0C7T5	P0C7T5	ATX1L_HUMAN	ATXN1L	Ataxin-1-like	P0C7T5	FALSE	0	-0.466664	0.0316373	-0.217514	0.115688	0.0761769	-2.15818	FALSE	FALSE	Stable	Stable
ATXN2	21.5833	21.6368	21.5558	21.7875	21.7321	21.7983	Q99700	Q99700	ATX2_HUMAN	ATXN2	Ataxin-2	Q99700	FALSE	0	0.0854669	0.27588	0.180674	0.00962529	0.00373856	4.69128	FALSE	FALSE	Stable	Stable
ATXN2L	22.8378	23.0122	22.8678	23.0826	23.0611	23.1248	Q8WWM7	Q8WWM7	ATX2L_HUMAN	ATXN2L	Ataxin-2-like protein	Q8WWM7	FALSE	0	0.047	0.320234	0.183617	0.0326083	0.0169614	3.32256	FALSE	FALSE	Stable	Stable
ATXN3	21.74	21.7002	21.6539	21.1592	21.1859	21.1814	P54252	P54252	ATX3_HUMAN	ATXN3	Ataxin-3	P54252	FALSE	0	-0.61084	-0.434275	-0.522558	0.000130309	8.97814e-06	-14.6327	TRUE	TRUE	Down	Down
ATXN7	18.8051	18.7675	18.6621	18.8634	18.8455	18.966	O15265	O15265	ATX7_HUMAN	ATXN7	Ataxin-7	O15265	FALSE	0	0.0101909	0.283225	0.146708	0.0662332	0.0392196	2.65663	FALSE	FALSE	Stable	Stable
ATXN7L3B	21.7257	21.7997	21.8516	22.0345	22.0196	22.0762	Q96GX2	Q96GX2	A7L3B_HUMAN	ATXN7L3B	Ataxin-7-like protein 3B	Q96GX2	FALSE	0	0.142605	0.359538	0.251072	0.00448143	0.00142249	5.72225	FALSE	FALSE	Stable	Stable
AUH	21.2742	21.195	21.2094	20.9251	20.9478	20.7893	Q13825	Q13825	AUHM_HUMAN	AUH	Methylglutaconyl-CoA hydratase, mitochondrial	Q13825	FALSE	0	-0.472225	-0.205359	-0.338792	0.00311556	0.000890733	-6.27673	FALSE	FALSE	Stable	Stable
AUP1	21.5992	21.5388	21.69	21.1672	21.0979	21.0165	Q9Y679	Q9Y679	AUP1_HUMAN	AUP1	Lipid droplet-regulating VLDL assembly factor AUP1	Q9Y679	FALSE	0	-0.660797	-0.370188	-0.515493	0.000849175	0.000152556	-8.77017	TRUE	TRUE	Down	Down
AURKA	21.3834	21.5023	21.6358	22.1639	22.148	22.2601	O14965	O14965	AURKA_HUMAN	AURKA	Aurora kinase A	O14965	FALSE	0	0.50281	0.864198	0.683504	0.00066855	0.000107709	9.35105	TRUE	TRUE	Up	Up
AURKB	22.4409	22.4619	22.4089	22.4211	22.4734	22.4836	Q96GD4	Q96GD4	AURKB_HUMAN	AURKB	Aurora kinase B	Q96GD4	FALSE	0	-0.0643602	0.108601	0.0221203	0.615135	0.551443	0.632319	FALSE	FALSE	Stable	Stable
AVEN	21.0755	21.0578	21.1278	20.9672	21.0742	21.1325	Q9NQS1	Q9NQS1	AVEN_HUMAN	AVEN	Cell death regulator Aven	Q9NQS1	FALSE	0	-0.158297	0.100141	-0.0290776	0.658295	0.598951	-0.556284	FALSE	FALSE	Stable	Stable
AVL9	19.2839	19.3885	18.9673	19.6634	19.5486	19.7325	Q8NBF6	Q8NBF6	AVL9_HUMAN	AVL9	Late secretory pathway protein AVL9 homolog	Q8NBF6	FALSE	0	0.143135	0.726722	0.434929	0.02295	0.0110568	3.68473	FALSE	FALSE	Stable	Stable
AXIN1	18.0959	18.0675	17.9577	17.2201	17.5198	17.1511	O15169	O15169	AXIN1_HUMAN	AXIN1	Axin-1	O15169	FALSE	0	-1.00179	-0.48493	-0.743358	0.00190697	0.000466612	-7.11086	TRUE	TRUE	Down	Down
AXL	23.4499	23.4811	23.4436	23.415	23.2602	23.4181	P30530	P30530	UFO_HUMAN	AXL	Tyrosine-protein kinase receptor UFO	P30530	FALSE	0	-0.224057	0.0365749	-0.093741	0.179614	0.127754	-1.77826	FALSE	FALSE	Stable	Stable
AZI2	18.4796	18.4814	18.7774	18.601	18.5862	18.6647	Q9H6S1	Q9H6S1	AZI2_HUMAN	AZI2	5-azacytidine-induced protein 2	Q9H6S1	FALSE	0	-0.183367	0.258989	0.0378109	0.739731	0.687907	0.422608	FALSE	FALSE	Stable	Stable
B2M	21.8819	21.9975	22.0086	22.4343	22.501	22.4623	P61769	P61769	B2MG_HUMAN	B2M	Beta-2-microglobulin	P61769	FALSE	0	0.387298	0.619076	0.503187	0.000403466	5.05567e-05	10.7338	TRUE	TRUE	Up	Up
B3GALT6	19.7406	19.7278	19.714	19.7956	19.7637	19.8532	Q96L58	Q96L58	B3GT6_HUMAN	B3GALT6	Beta-1,3-galactosyltransferase 6	Q96L58	FALSE	0	-0.0129191	0.166368	0.0767245	0.121478	0.0806774	2.11582	FALSE	FALSE	Stable	Stable
B3GAT3	20.2262	20.3118	20.3798	21.1908	21.1156	21.1602	O94766	O94766;Q9NPZ5	B3GA3_HUMAN	B3GAT3	Galactosylgalactosylxylosylprotein 3-beta-glucuronosyltransferase 3	O94766	FALSE	0	0.725986	0.973197	0.849591	7.93333e-05	3.86215e-06	16.9917	TRUE	TRUE	Up	Up
B3GLCT	19.1543	18.5448	18.6471	18.4958	18.1674	18.3846	Q6Y288	Q6Y288	B3GLT_HUMAN	B3GLCT	Beta-1,3-glucosyltransferase	Q6Y288	FALSE	0	-0.874557	0.00889522	-0.432831	0.085917	0.0534201	-2.42231	FALSE	FALSE	Stable	Stable
B3GNT9	18.3384	18.4346	18.5515	18.3038	18.4071	18.4077	Q6UX72	Q6UX72	B3GN9_HUMAN	B3GNT9	UDP-GlcNAc:betaGal beta-1,3-N-acetylglucosaminyltransferase 9	Q6UX72	FALSE	0	-0.230003	0.0927472	-0.0686277	0.405017	0.335228	-1.0513	FALSE	FALSE	Stable	Stable
B3GNTL1	16.0111	16.2913	16.2434	16.7956	17.0695	17.3658	Q67FW5	Q67FW5	B3GNL_HUMAN	B3GNTL1	UDP-GlcNAc:betaGal beta-1,3-N-acetylglucosaminyltransferase-like protein 1	Q67FW5	TRUE	3	0.505521	1.28461	0.895063	0.00462304	0.00147592	5.6802	TRUE	TRUE	Up	Up
B4GALNT1	18.2357	18.1398	18.5185	16.0296	16.7194	16.705	Q00973	Q00973	B4GN1_HUMAN	B4GALNT1	Beta-1,4 N-acetylgalactosaminyltransferase 1	Q00973	TRUE	1	-2.34211	-1.28453	-1.81332	0.000953717	0.000183251	-8.47724	TRUE	TRUE	Down	Down
B4GALT1	22.4334	22.4926	22.5069	22.2991	22.6408	22.4426	P15291	P15291	B4GT1_HUMAN	B4GALT1	Beta-1,4-galactosyltransferase 1	P15291	FALSE	0	-0.237484	0.20389	-0.0167973	0.883138	0.857207	-0.18816	FALSE	FALSE	Stable	Stable
B4GALT4	18.8962	18.9069	18.5522	19.6747	19.4448	19.4519	O60513	O60513	B4GT4_HUMAN	B4GALT4	Beta-1,4-galactosyltransferase 4	O60513	FALSE	0	0.444353	1.03314	0.738746	0.00326232	0.000945832	6.20343	TRUE	TRUE	Up	Up
B4GALT5	19.5876	19.4164	19.2422	19.7746	19.6191	19.8228	O43286	O43286	B4GT5_HUMAN	B4GALT5	Beta-1,4-galactosyltransferase 5	O43286	FALSE	0	0.0721558	0.57463	0.323393	0.0375576	0.0201329	3.18208	FALSE	FALSE	Stable	Stable
B4GALT7	18.5495	18.0528	18.5134	18.7034	18.5824	18.3466	Q9UBV7	Q9UBV7	B4GT7_HUMAN	B4GALT7	Beta-1,4-galactosyltransferase 7	Q9UBV7	FALSE	0	-0.227821	0.572273	0.172226	0.399689	0.329789	1.06427	FALSE	FALSE	Stable	Stable
B4GAT1	20.1644	20.444	20.5346	20.871	20.7695	20.6601	O43505	O43505	B4GA1_HUMAN	B4GAT1	Beta-1,4-glucuronyltransferase 1	O43505	FALSE	0	0.115124	0.656635	0.385879	0.0267751	0.0133479	3.52321	FALSE	FALSE	Stable	Stable
BABAM1	20.5702	20.2957	20.4141	20.5415	20.2476	20.3649	Q9NWV8	Q9NWV8	BABA1_HUMAN	BABAM1	BRISC and BRCA1-A complex member 1	Q9NWV8	FALSE	0	-0.29242	0.208393	-0.0420135	0.74421	0.693318	-0.414771	FALSE	FALSE	Stable	Stable
BABAM2	22.6836	22.5669	22.6292	22.5437	22.5327	22.4985	Q9NXR7	Q9NXR7	BABA2_HUMAN	BABAM2	BRISC and BRCA1-A complex member 2	Q9NXR7	FALSE	0	-0.203989	0.000828797	-0.10158	0.0831491	0.0513458	-2.45208	FALSE	FALSE	Stable	Stable
BACE2	18.8648	18.8124	18.8503	16.5066	17.409	16.8068	Q9Y5Z0	Q9Y5Z0	BACE2_HUMAN	BACE2	Beta-secretase 2	Q9Y5Z0	FALSE	0	-2.48711	-1.38296	-1.93503	0.000886851	0.000162865	-8.66469	TRUE	TRUE	Down	Down
BACH1	18.7907	18.8572	18.8341	18.7557	18.9652	18.9763	O14867	O14867	BACH1_HUMAN	BACH1	Transcription regulator protein BACH1	O14867	FALSE	0	-0.0966774	0.240096	0.0717091	0.404524	0.334611	1.05276	FALSE	FALSE	Stable	Stable
BAD	21.5892	21.6041	21.6577	21.8305	21.9957	21.9903	Q92934	Q92934	BAD_HUMAN	BAD	Bcl2-associated agonist of cell death	Q92934	FALSE	0	0.183289	0.460318	0.321804	0.00441734	0.0013966	5.74328	FALSE	FALSE	Stable	Stable
BAG1	19.2096	18.9978	19.0112	18.7745	18.702	18.8445	Q99933	Q99933	BAG1_HUMAN	BAG1	BAG family molecular chaperone regulator 1	Q99933	FALSE	0	-0.47803	-0.120373	-0.299202	0.0153494	0.00667349	-4.1361	FALSE	FALSE	Stable	Stable
BAG2	23.7757	23.7715	23.7511	24.0037	24.0437	23.9265	O95816	O95816	BAG2_HUMAN	BAG2	BAG family molecular chaperone regulator 2	O95816	FALSE	0	0.124485	0.325964	0.225225	0.00513701	0.00169123	5.52689	FALSE	FALSE	Stable	Stable
BAG3	22.79	22.8636	22.9156	23.4019	23.5325	23.4703	O95817	O95817	BAG3_HUMAN	BAG3	BAG family molecular chaperone regulator 3	O95817	FALSE	0	0.483181	0.740516	0.611848	0.000286893	3.05551e-05	11.7554	TRUE	TRUE	Up	Up
BAG4	20.1542	20.3248	20.4202	20.0549	20.474	20.6804	O95429	O95429	BAG4_HUMAN	BAG4	BAG family molecular chaperone regulator 4	O95429	FALSE	0	-0.314172	0.520929	0.103378	0.626127	0.563877	0.612046	FALSE	FALSE	Stable	Stable
BAG5	19.944	20.0192	19.8651	19.7714	19.7053	19.7734	Q9UL15	Q9UL15	BAG5_HUMAN	BAG5	BAG family molecular chaperone regulator 5	Q9UL15	FALSE	0	-0.316839	-0.0685749	-0.192707	0.0198886	0.00928476	-3.83776	FALSE	FALSE	Stable	Stable
BAG6	23.517	23.5164	23.5193	23.8072	23.7351	23.7295	P46379	P46379	BAG6_HUMAN	BAG6	Large proline-rich protein BAG6	P46379	FALSE	0	0.152916	0.326567	0.239742	0.00223985	0.000577762	6.8259	FALSE	FALSE	Stable	Stable
BAIAP2	22.4593	22.44	22.4848	22.9023	22.8271	22.8266	Q9UQB8	Q9UQB8	BAIP2_HUMAN	BAIAP2	Brain-specific angiogenesis inhibitor 1-associated protein 2	Q9UQB8	FALSE	0	0.299636	0.481578	0.390607	0.000421318	5.37703e-05	10.6145	FALSE	FALSE	Stable	Stable
BAIAP2L1	18.5259	18.6182	18.6265	16.1774	16.0412	16.3021	Q9UHR4	Q9UHR4	BI2L1_HUMAN	BAIAP2L1	Brain-specific angiogenesis inhibitor 1-associated protein 2-like protein 1	Q9UHR4	TRUE	3	-2.59938	-2.23391	-2.41665	9.80109e-06	9.24745e-08	-32.6933	TRUE	TRUE	Down	Down
BAK1	21.7337	22.1174	21.8832	22.6801	22.2586	22.3226	Q16611	Q16611	BAK_HUMAN	BAK1	Bcl-2 homologous antagonist/killer	Q16611	FALSE	0	0.147301	0.87076	0.50903	0.027981	0.014068	3.47876	FALSE	FALSE	Stable	Stable
BANF1	24.0705	24.4683	24.3847	24.4215	24.663	24.5995	O75531	O75531	BAF_HUMAN	BANF1	Barrier-to-autointegration factor	O75531	FALSE	0	-0.0453237	0.552342	0.253509	0.123987	0.0827473	2.09715	FALSE	FALSE	Stable	Stable
BANP	19.3991	19.4472	19.2952	19.7537	19.5699	19.7781	Q8N9N5	Q8N9N5	BANP_HUMAN	BANP	Protein BANP	Q8N9N5	FALSE	0	0.141896	0.498283	0.32009	0.0118871	0.00482985	4.44062	FALSE	FALSE	Stable	Stable
BAP1	19.3447	19.3669	20.9839	19.1085	19.4365	20.1606	Q92560	Q92560	BAP1_HUMAN	BAP1	Ubiquitin carboxyl-terminal hydrolase BAP1	Q92560	FALSE	0	-1.62058	0.960608	-0.329987	0.615211	0.55159	-0.632078	FALSE	FALSE	Stable	Stable
BAP18	21.2687	21.3887	21.1863	21.2507	21.2828	21.2941	Q8IXM2	Q8IXM2	BAP18_HUMAN	BAP18	Chromatin complexes subunit BAP18	Q8IXM2	FALSE	0	-0.147696	0.13696	-0.00536787	0.942594	0.928877	-0.0932341	FALSE	FALSE	Stable	Stable
BARD1	21.1839	21.3952	21.2692	20.7808	20.9955	20.8366	Q99728	Q99728	BARD1_HUMAN	BARD1	BRCA1-associated RING domain protein 1	Q99728	FALSE	0	-0.607793	-0.215829	-0.411811	0.00655132	0.00229402	-5.19453	FALSE	FALSE	Stable	Stable
BASP1	25.1418	25.1623	24.9791	25.5228	25.6114	25.5984	P80723	P80723	BASP1_HUMAN	BASP1	Brain acid soluble protein 1	P80723	FALSE	0	0.333519	0.632722	0.48312	0.00120605	0.00025286	7.98331	FALSE	FALSE	Stable	Stable
BAX	23.0287	23.0537	22.9922	22.9079	22.9674	22.9134	Q07812	Q07812	BAX_HUMAN	BAX	Apoptosis regulator BAX	Q07812	FALSE	0	-0.183379	-0.00722288	-0.0953008	0.0649354	0.0383006	-2.67481	FALSE	FALSE	Stable	Stable
BAZ1A	20.874	20.6846	20.7039	21.3301	21.2591	21.2474	Q9NRL2	Q9NRL2	BAZ1A_HUMAN	BAZ1A	Bromodomain adjacent to zinc finger domain protein 1A	Q9NRL2	FALSE	0	0.372745	0.67667	0.524707	0.000929593	0.000176581	8.53579	TRUE	TRUE	Up	Up
BAZ1B	23.4447	23.4544	23.4849	23.3166	23.2944	23.3254	Q9UIG0	Q9UIG0	BAZ1B_HUMAN	BAZ1B	Tyrosine-protein kinase BAZ1B	Q9UIG0	FALSE	0	-0.225773	-0.0726686	-0.149221	0.00870614	0.00329297	-4.81876	FALSE	FALSE	Stable	Stable
BAZ2A	20.4041	20.4835	20.471	20.5562	20.5364	20.517	Q9UIF9	Q9UIF9	BAZ2A_HUMAN	BAZ2A	Bromodomain adjacent to zinc finger domain protein 2A	Q9UIF9	FALSE	0	-0.00581446	0.173117	0.0836513	0.0972503	0.0619572	2.31143	FALSE	FALSE	Stable	Stable
BAZ2B	16.7903	17.3149	17.0766	16.2378	16.9691	16.2074	Q9UIF8	Q9UIF8	BAZ2B_HUMAN	BAZ2B	Bromodomain adjacent to zinc finger domain protein 2B	Q9UIF8	TRUE	1	-1.19393	0.0155822	-0.589176	0.0873257	0.0544197	-2.40839	FALSE	FALSE	Stable	Stable
BBLN	19.4435	19.6244	19.7908	19.2858	19.2943	19.4601	Q9BUW7	Q9BUW7	BBLN_HUMAN	BBLN	Bublin coiled-coil protein	Q9BUW7	FALSE	0	-0.520314	-0.025369	-0.272841	0.0613721	0.035859	-2.72551	FALSE	FALSE	Stable	Stable
BBS7	18.065	18.017	18.1137	18.5915	18.3874	18.4889	Q8IWZ6	Q8IWZ6	BBS7_HUMAN	BBS7	Bardet-Biedl syndrome 7 protein	Q8IWZ6	FALSE	0	0.272683	0.575423	0.424053	0.00210762	0.000535794	6.92539	FALSE	FALSE	Stable	Stable
BBX	20.7355	20.7484	20.7485	20.6136	20.7219	20.7999	Q8WY36	Q8WY36	BBX_HUMAN	BBX	HMG box transcription factor BBX	Q8WY36	FALSE	0	-0.164091	0.0993498	-0.0323705	0.628336	0.566676	-0.607521	FALSE	FALSE	Stable	Stable
BCAM	23.1887	23.2815	23.1746	21.822	21.9124	21.8898	P50895	P50895	BCAM_HUMAN	BCAM	Basal cell adhesion molecule	P50895	FALSE	0	-1.45325	-1.22718	-1.34021	1.3281e-05	1.7285e-07	-29.3111	TRUE	TRUE	Down	Down
BCAP29	20.665	20.7158	20.745	21.176	21.1034	21.1376	Q9UHQ4	Q9UHQ4	BAP29_HUMAN	BCAP29	B-cell receptor-associated protein 29	Q9UHQ4	FALSE	0	0.335273	0.5256	0.430436	0.00034836	4.03317e-05	11.1816	FALSE	FALSE	Stable	Stable
BCAP31	25.5299	25.5648	25.5108	25.0323	25.144	25.056	P51572	P51572	BAP31_HUMAN	BCAP31	B-cell receptor-associated protein 31	P51572	FALSE	0	-0.561803	-0.353592	-0.457698	0.000384628	4.71921e-05	-10.8685	FALSE	FALSE	Stable	Stable
BCAR1	21.2776	21.2266	21.2237	22.8134	22.8866	22.7928	P56945	P56945	BCAR1_HUMAN	BCAR1	Breast cancer anti-estrogen resistance protein 1	P56945	FALSE	0	1.49028	1.68633	1.58831	5.03509e-06	2.8851e-08	40.0548	TRUE	TRUE	Up	Up
BCAR3	19.582	19.4802	19.3346	21.3668	21.3993	21.3435	O75815	O75815	BCAR3_HUMAN	BCAR3	Breast cancer anti-estrogen resistance protein 3	O75815	FALSE	0	1.73737	2.0712	1.90428	1.48861e-05	2.15481e-07	28.2035	TRUE	TRUE	Up	Up
BCAS2	21.8222	21.7997	21.793	21.8336	21.968	21.8624	O75934	O75934	SPF27_HUMAN	BCAS2	Pre-mRNA-splicing factor SPF27	O75934	FALSE	0	-0.0278735	0.193867	0.0829967	0.165237	0.115758	1.85059	FALSE	FALSE	Stable	Stable
BCAS3	19.8935	19.8933	19.8054	19.6517	19.6442	19.6571	Q9H6U6	Q9H6U6	BCAS3_HUMAN	BCAS3	BCAS3 microtubule associated cell migration factor	Q9H6U6	FALSE	0	-0.305685	-0.120396	-0.213041	0.00460848	0.00147008	-5.6847	FALSE	FALSE	Stable	Stable
BCAT1	23.1312	23.1974	23.1589	23.6816	23.5438	23.6318	P54687	P54687	BCAT1_HUMAN	BCAT1	Branched-chain-amino-acid aminotransferase, cytosolic	P54687	FALSE	0	0.341144	0.572045	0.456594	0.000571794	8.4462e-05	9.77685	FALSE	FALSE	Stable	Stable
BCAT2	23.0411	23.0162	22.9987	22.352	22.3877	22.376	O15382	O15382	BCAT2_HUMAN	BCAT2	Branched-chain-amino-acid aminotransferase, mitochondrial	O15382	FALSE	0	-0.724107	-0.569354	-0.646731	4.27774e-05	1.27258e-06	-20.6623	TRUE	TRUE	Down	Down
BCCIP	22.0845	22.1791	22.0926	22.5124	22.3774	22.3314	Q9P287	Q9P287	BCCIP_HUMAN	BCCIP	BRCA2 and CDKN1A-interacting protein	Q9P287	FALSE	0	0.142418	0.434223	0.288321	0.00827781	0.00308512	4.88513	FALSE	FALSE	Stable	Stable
BCHE	20.1019	19.8447	19.813	19.0177	19.0378	16.2292	P06276	P06276	CHLE_HUMAN	BCHE	Cholinesterase	P06276	TRUE	1	-3.75759	0.107676	-1.82496	0.0948224	0.0600806	-2.33436	FALSE	FALSE	Stable	Stable
BCKDHA	21.9034	21.8693	21.9122	21.739	21.8399	21.704	P12694	P12694	ODBA_HUMAN	BCKDHA	2-oxoisovalerate dehydrogenase subunit alpha, mitochondrial	P12694	FALSE	0	-0.246415	-0.0215423	-0.133979	0.0481302	0.0270434	-2.94573	FALSE	FALSE	Stable	Stable
BCKDHB	21.3501	21.2403	21.3932	21.2971	21.3845	21.3362	P21953	P21953	ODBB_HUMAN	BCKDHB	2-oxoisovalerate dehydrogenase subunit beta, mitochondrial	P21953	FALSE	0	-0.116657	0.139393	0.0113682	0.864093	0.833825	0.219512	FALSE	FALSE	Stable	Stable
BCKDK	21.105	21.2313	21.1922	20.4022	20.5238	20.5895	O14874	O14874	BCKD_HUMAN	BCKDK	[3-methyl-2-oxobutanoate dehydrogenase [lipoamide]] kinase, mitochondrial	O14874	FALSE	0	-0.824582	-0.517452	-0.671017	0.000392926	4.88183e-05	-10.802	TRUE	TRUE	Down	Down
BCL10	22.0975	22.2048	22.1196	22.1728	22.1183	22.1624	O95999	O95999	BCL10_HUMAN	BCL10	B-cell lymphoma/leukemia 10	O95999	FALSE	0	-0.0924421	0.113539	0.0105486	0.844361	0.808912	0.253197	FALSE	FALSE	Stable	Stable
BCL2L1	20.1122	19.7524	20.1439	20.8882	20.8631	20.8028	Q07817	Q07817	B2CL1_HUMAN	BCL2L1	Bcl-2-like protein 1	Q07817	FALSE	0	0.575545	1.12153	0.848539	0.00140419	0.000309952	7.68393	TRUE	TRUE	Up	Up
BCL2L12	19.972	19.8589	19.8688	19.537	19.6576	19.5328	Q9HB09	Q9HB09	B2L12_HUMAN	BCL2L12	Bcl-2-like protein 12	Q9HB09	FALSE	0	-0.456544	-0.191646	-0.324095	0.00359238	0.0010752	-6.04907	FALSE	FALSE	Stable	Stable
BCL2L13	20.7338	20.5722	20.5827	20.2626	20.266	20.4013	Q9BXK5	Q9BXK5	B2L13_HUMAN	BCL2L13	Bcl-2-like protein 13	Q9BXK5	FALSE	0	-0.478698	-0.160513	-0.319606	0.00777062	0.00285106	-4.96626	FALSE	FALSE	Stable	Stable
BCL3	20.0121	20.1719	20.1122	18.6124	18.7085	18.5828	P20749	P20749	BCL3_HUMAN	BCL3	B-cell lymphoma 3 protein	P20749	FALSE	0	-1.60634	-1.32198	-1.46416	2.11663e-05	3.87071e-07	-25.4573	TRUE	TRUE	Down	Down
BCL7A	20.7204	20.4218	20.5432	20.5372	20.7609	20.8327	Q4VC05	Q4VC05;Q8WUZ0;Q9BQE9	BCL7A_HUMAN	BCL7A	B-cell CLL/lymphoma 7 protein family member A	Q4VC05	FALSE	0	-0.116842	0.413832	0.148495	0.280976	0.217761	1.38349	FALSE	FALSE	Stable	Stable
BCL9L	18.8564	19.1439	19.0431	18.7465	18.7297	18.7693	Q86UU0	Q86UU0	BCL9L_HUMAN	BCL9L	B-cell CLL/lymphoma 9-like protein	Q86UU0	FALSE	0	-0.45455	-0.0773763	-0.265963	0.0277651	0.0139416	-3.48637	FALSE	FALSE	Stable	Stable
BCLAF1	23.9228	23.7584	23.6969	23.6348	23.6839	23.7914	Q9NYF8	Q9NYF8	BCLF1_HUMAN	BCLAF1	Bcl-2-associated transcription factor 1	Q9NYF8	FALSE	0	-0.271656	0.0930025	-0.0893266	0.340953	0.273202	-1.21112	FALSE	FALSE	Stable	Stable
BCLAF3	15.6687	16.0401	15.2885	16.4583	15.0599	15.9661	A2AJT9	A2AJT9	BCLA3_HUMAN	BCLAF3	BCLAF1 and THRAP3 family member 3	A2AJT9	TRUE	2	-0.795197	1.11985	0.162325	0.741704	0.690338	0.419084	FALSE	FALSE	Stable	Stable
BCOR	17.8637	17.6845	17.7569	16.854	17.4474	17.1745	Q6W2J9	Q6W2J9	BCOR_HUMAN	BCOR	BCL-6 corepressor	Q6W2J9	FALSE	0	-0.98558	-0.233908	-0.609744	0.0170711	0.00765508	-4.01064	FALSE	FALSE	Down	Stable
BCORL1	19.4885	19.4434	19.5138	19.5238	19.6311	19.6122	Q5H9F3	Q5H9F3	BCORL_HUMAN	BCORL1	BCL-6 corepressor-like protein 1	Q5H9F3	FALSE	0	0.00075736	0.213503	0.10713	0.079701	0.048847	2.48969	FALSE	FALSE	Stable	Stable
BCR	20.9726	21.0117	20.9634	20.7177	20.7893	20.7393	P11274	P11274	BCR_HUMAN	BCR	Breakpoint cluster region protein	P11274	FALSE	0	-0.321663	-0.146003	-0.233833	0.00258831	0.000697993	-6.58155	FALSE	FALSE	Stable	Stable
BCS1L	20.6108	20.6319	20.6282	20.1025	20.0638	19.9811	Q9Y276	Q9Y276	BCS1_HUMAN	BCS1L	Mitochondrial chaperone BCS1	Q9Y276	FALSE	0	-0.676974	-0.47199	-0.574482	0.000159968	1.21959e-05	-13.8564	TRUE	TRUE	Down	Down
BDH1	21.5931	21.4625	21.5439	22.4969	22.5602	22.5266	Q02338	Q02338	BDH_HUMAN	BDH1	D-beta-hydroxybutyrate dehydrogenase, mitochondrial	Q02338	FALSE	0	0.883148	1.10629	0.99472	3.42997e-05	8.81146e-07	22.0398	TRUE	TRUE	Up	Up
BDH2	19.8157	20.0021	20.155	19.4681	19.3526	19.5743	Q9BUT1	Q9BUT1	DHRS6_HUMAN	BDH2	Dehydrogenase/reductase SDR family member 6	Q9BUT1	FALSE	0	-0.777255	-0.274585	-0.52592	0.00664868	0.00234117	-5.17286	TRUE	TRUE	Down	Down
BECN1	20.6909	20.7127	20.625	20.7741	20.5809	20.7791	Q14457	Q14457	BECN1_HUMAN	BECN1	Beclin-1	Q14457	FALSE	0	-0.125768	0.196088	0.0351601	0.667654	0.609358	0.540111	FALSE	FALSE	Stable	Stable
BEND3	17.3433	16.8846	16.9111	17.2167	17.6244	17.4256	Q5T5X7	Q5T5X7	BEND3_HUMAN	BEND3	BEN domain-containing protein 3	Q5T5X7	FALSE	0	-0.0209821	0.772823	0.375921	0.0941228	0.0595162	2.3414	FALSE	FALSE	Stable	Stable
BICC1	19.2865	19.3151	19.1537	17.552	18.1698	17.3542	Q9H694	Q9H694	BICC1_HUMAN	BICC1	Protein bicaudal C homolog 1	Q9H694	FALSE	0	-2.08086	-1.0387	-1.55978	0.00163504	0.000378386	-7.39982	TRUE	TRUE	Down	Down
BICD1	17.6744	17.9743	17.7118	17.641	17.7737	17.7756	Q96G01	Q96G01	BICD1_HUMAN	BICD1	Protein bicaudal D homolog 1	Q96G01	FALSE	0	-0.282793	0.169368	-0.0567123	0.621314	0.558903	-0.620123	FALSE	FALSE	Stable	Stable
BICD2	22.0283	22.0851	22.0076	22.4377	22.4798	22.4741	Q8TD16	Q8TD16	BICD2_HUMAN	BICD2	Protein bicaudal D homolog 2	Q8TD16	FALSE	0	0.33472	0.512361	0.42354	0.000283528	3.00872e-05	11.7881	FALSE	FALSE	Stable	Stable
BICRA	16.0225	16.7667	16.921	15.4479	16.2571	16.2124	Q9NZM4	Q9NZM4	BICRA_HUMAN	BICRA	BRD4-interacting chromatin-remodeling complex-associated protein	Q9NZM4	FALSE	0	-1.38768	0.192565	-0.597556	0.161627	0.112795	-1.8696	FALSE	FALSE	Stable	Stable
BICRAL	16.2473	16.4332	16.0308	18.0773	16.5874	16.8718	Q6AI39	Q6AI39	BICRL_HUMAN	BICRAL	BRD4-interacting chromatin-remodeling complex-associated protein-like	Q6AI39	FALSE	0	-0.0317926	1.91528	0.941745	0.08902	0.0556705	2.39136	FALSE	FALSE	Stable	Stable
BID	22.5898	22.7768	22.7293	22.5886	22.7067	22.603	P55957	P55957	BID_HUMAN	BID	BH3-interacting domain death agonist	P55957	FALSE	0	-0.22117	0.0893776	-0.0658961	0.405814	0.336149	-1.04912	FALSE	FALSE	Stable	Stable
BIN1	23.1391	23.1868	23.1898	22.428	22.4196	22.4577	O00499	O00499	BIN1_HUMAN	BIN1	Myc box-dependent-interacting protein 1	O00499	FALSE	0	-0.817936	-0.655598	-0.736767	3.17456e-05	7.95464e-07	-22.439	TRUE	TRUE	Down	Down
BIN3	19.9781	19.9765	19.9156	20.3362	20.5572	20.2764	Q9NQY0	Q9NQY0	BIN3_HUMAN	BIN3	Bridging integrator 3	Q9NQY0	FALSE	0	0.23922	0.627226	0.433223	0.00515801	0.00170118	5.52035	FALSE	FALSE	Stable	Stable
BIRC2	20.4727	20.5358	20.5235	20.6088	20.627	20.6075	Q13490	Q13490	BIRC2_HUMAN	BIRC2	Baculoviral IAP repeat-containing protein 2	Q13490	FALSE	0	0.0223385	0.185173	0.103756	0.0386977	0.0209361	3.15036	FALSE	FALSE	Stable	Stable
BIRC5	17.4237	17.7651	17.0548	17.2992	17.0144	17.22	O15392	O15392	BIRC5_HUMAN	BIRC5	Baculoviral IAP repeat-containing protein 5	O15392	FALSE	0	-0.699322	0.225963	-0.23668	0.321039	0.254764	-1.26468	FALSE	FALSE	Stable	Stable
BIRC6	21.3161	21.2832	21.2383	21.4602	21.3813	21.4397	Q9NR09	Q9NR09	BIRC6_HUMAN	BIRC6	Baculoviral IAP repeat-containing protein 6	Q9NR09	FALSE	0	0.0509013	0.244792	0.147847	0.0211592	0.0100262	3.77006	FALSE	FALSE	Stable	Stable
BLM	23.4567	23.4893	23.4424	23.0315	22.9564	23.0406	P54132	P54132	BLM_HUMAN	BLM	RecQ-like DNA helicase BLM	P54132	FALSE	0	-0.546692	-0.359963	-0.453327	0.000266184	2.72094e-05	-12.0032	FALSE	FALSE	Stable	Stable
BLMH	24.4452	24.501	24.4161	24.3183	24.2359	24.3384	Q13867	Q13867	BLMH_HUMAN	BLMH	Bleomycin hydrolase	Q13867	FALSE	0	-0.26466	-0.0484725	-0.156566	0.0253967	0.0124776	-3.58065	FALSE	FALSE	Stable	Stable
BLOC1S1	21.2009	20.8275	21.1726	20.7337	20.8042	20.737	P78537	P78537	BL1S1_HUMAN	BLOC1S1	Biogenesis of lysosome-related organelles complex 1 subunit 1	P78537	FALSE	0	-0.570013	-0.0474305	-0.308722	0.0494019	0.0279106	-2.92083	FALSE	FALSE	Stable	Stable
BLOC1S3	21.443	21.5419	21.4969	21.2833	21.3982	21.2714	Q6QNY0	Q6QNY0	BL1S3_HUMAN	BLOC1S3	Biogenesis of lysosome-related organelles complex 1 subunit 3	Q6QNY0	FALSE	0	-0.299985	-0.0527353	-0.17636	0.0266885	0.0132944	-3.52662	FALSE	FALSE	Stable	Stable
BLOC1S4	19.9248	20.0949	20.0347	19.5653	19.9477	19.7828	Q9NUP1	Q9NUP1	BL1S4_HUMAN	BLOC1S4	Biogenesis of lysosome-related organelles complex 1 subunit 4	Q9NUP1	FALSE	0	-0.512608	0.00686418	-0.252872	0.087444	0.0545385	-2.40676	FALSE	FALSE	Stable	Stable
BLOC1S5	20.6892	20.7676	20.7864	20.6083	20.7539	20.7654	Q8TDH9	Q8TDH9	BL1S5_HUMAN	BLOC1S5	Biogenesis of lysosome-related organelles complex 1 subunit 5	Q8TDH9	FALSE	0	-0.178078	0.101056	-0.0385108	0.587713	0.521638	-0.682126	FALSE	FALSE	Stable	Stable
BLOC1S6	18.1074	18.169	18.1905	17.8866	17.8289	17.4127	Q9UL45	Q9UL45	BL1S6_HUMAN	BLOC1S6	Biogenesis of lysosome-related organelles complex 1 subunit 6	Q9UL45	FALSE	0	-0.765816	-0.12668	-0.446248	0.0287424	0.0145211	-3.45205	FALSE	FALSE	Stable	Stable
BLVRA	24.2485	24.2327	24.2014	24.0596	23.9826	24.0426	P53004	P53004	BIEA_HUMAN	BLVRA	Biliverdin reductase A	P53004	FALSE	0	-0.288758	-0.109833	-0.199296	0.00520765	0.00172158	-5.50709	FALSE	FALSE	Stable	Stable
BLVRB	22.8046	22.9584	22.7808	22.8968	22.9863	22.8647	P30043	P30043	BLVRB_HUMAN	BLVRB	Flavin reductase (NADPH)	P30043	FALSE	0	-0.0858171	0.221769	0.067976	0.387995	0.318141	1.09265	FALSE	FALSE	Stable	Stable
BLZF1	18.6305	18.6415	18.6109	18.789	18.6554	18.6653	Q9H2G9	Q9H2G9	GO45_HUMAN	BLZF1	Golgin-45	Q9H2G9	FALSE	0	-0.0386637	0.189896	0.0756162	0.211836	0.155092	1.63572	FALSE	FALSE	Stable	Stable
BMP1	19.8499	19.92	19.9305	18.9529	18.8223	18.6827	P13497	P13497	BMP1_HUMAN	BMP1	Bone morphogenetic protein 1	P13497	FALSE	0	-1.26363	-0.897992	-1.08081	0.000130725	9.04047e-06	-14.6147	TRUE	TRUE	Down	Down
BMP2K	19.782	19.7825	19.8748	19.5862	19.5201	19.5455	Q9NSY1	Q9NSY1	BMP2K_HUMAN	BMP2K	BMP-2-inducible protein kinase	Q9NSY1	FALSE	0	-0.364949	-0.160124	-0.262537	0.00300227	0.000848011	-6.33726	FALSE	FALSE	Stable	Stable
BMPER	17.6881	17.8618	17.5731	17.5407	17.8376	18.0433	Q8N8U9	Q8N8U9	BMPER_HUMAN	BMPER	BMP-binding endothelial regulator protein	Q8N8U9	FALSE	0	-0.254197	0.453246	0.0995244	0.580804	0.513785	0.695555	FALSE	FALSE	Stable	Stable
BMPR1A	17.6432	17.4391	17.7924	16.675	17.7129	17.2227	O00238;P36894	O00238;P36894	BMR1A_HUMAN;BMR1B_HUMAN	BMPR1A;BMPR1B	Bone morphogenetic protein receptor type-1B	O00238	FALSE	0	-1.07779	0.235136	-0.421325	0.223892	0.165763	-1.58662	FALSE	FALSE	Stable	Stable
BMPR2	18.2798	18.3864	18.4357	17.7542	17.5255	17.7073	Q13873	Q13873	BMPR2_HUMAN	BMPR2	Bone morphogenetic protein receptor type-2	Q13873	FALSE	0	-0.890722	-0.519219	-0.704971	0.000662392	0.000105778	-9.38215	TRUE	TRUE	Down	Down
BMS1	21.5351	21.5056	21.6393	21.7796	21.7817	21.7452	Q14692	Q14692	BMS1_HUMAN	BMS1	Ribosome biogenesis protein BMS1 homolog	Q14692	FALSE	0	0.0972402	0.320414	0.208827	0.0101656	0.00399162	4.62634	FALSE	FALSE	Stable	Stable
BNC1	19.4099	19.7688	19.2053	19.1104	19.2073	19.3275	Q01954	Q01954	BNC1_HUMAN	BNC1	Zinc finger protein basonuclin-1	Q01954	FALSE	0	-0.616117	0.123548	-0.246285	0.209383	0.152891	-1.64625	FALSE	FALSE	Stable	Stable
BNIP1	21.9315	21.8872	21.9633	22.2372	22.2184	22.2068	Q12981	Q12981	SEC20_HUMAN	BNIP1	Vesicle transport protein SEC20	Q12981	FALSE	0	0.208139	0.37877	0.293454	0.000943892	0.000180269	8.5031	FALSE	FALSE	Stable	Stable
BNIP2	20.5889	20.5447	20.5755	20.6876	20.6252	20.6891	Q12982	Q12982	BNIP2_HUMAN	BNIP2	BCL2/adenovirus E1B 19 kDa protein-interacting protein 2	Q12982	FALSE	0	0.0110585	0.184087	0.0975726	0.0571986	0.0330743	2.78808	FALSE	FALSE	Stable	Stable
BNIP3	19.4279	19.4614	19.337	19.9199	19.7749	19.8206	Q12983	Q12983	BNIP3_HUMAN	BNIP3	BCL2/adenovirus E1B 19 kDa protein-interacting protein 3	Q12983	FALSE	0	0.293672	0.565777	0.429724	0.00131006	0.000284621	7.80813	FALSE	FALSE	Stable	Stable
BOD1L1	21.314	21.4451	21.3227	21.1831	21.36	21.3195	Q8NFC6	Q8NFC6	BD1L1_HUMAN	BOD1L1	Biorientation of chromosomes in cell division protein 1-like 1	Q8NFC6	FALSE	0	-0.230002	0.0838481	-0.073077	0.364501	0.2952	-1.1512	FALSE	FALSE	Stable	Stable
BOK	18.642	18.6813	18.5956	18.4388	18.354	18.5828	Q9UMX3	Q9UMX3	BOK_HUMAN	BOK	Bcl-2-related ovarian killer protein	Q9UMX3	FALSE	0	-0.343653	-0.018521	-0.181087	0.0594064	0.0345728	-2.75373	FALSE	FALSE	Stable	Stable
BOLA1	20.8598	20.8374	21.1692	21.1337	21.3096	21.4111	Q9Y3E2	Q9Y3E2	BOLA1_HUMAN	BOLA1	BolA-like protein 1	Q9Y3E2	FALSE	0	0.0439958	0.6147	0.329348	0.0532505	0.030421	2.85324	FALSE	FALSE	Stable	Stable
BOLA2B	20.1785	20.4674	20.8046	20.9488	20.5652	20.7417	Q9H3K6	Q9H3K6	BOLA2_HUMAN	BOLA2B	BolA-like protein 2	Q9H3K6	FALSE	0	-0.174301	0.711118	0.268408	0.247589	0.186623	1.49879	FALSE	FALSE	Stable	Stable
BOP1	22.5983	22.5303	22.5231	22.5221	22.5884	22.5761	Q14137	Q14137	BOP1_HUMAN	BOP1	Ribosome biogenesis protein BOP1	Q14137	FALSE	0	-0.0836394	0.10692	0.0116405	0.813697	0.773248	0.302019	FALSE	FALSE	Stable	Stable
BORA	15.6519	15.5154	15.5901	15.8865	15.8003	15.518	Q6PGQ7	Q6PGQ7	BORA_HUMAN	BORA	Protein aurora borealis	Q6PGQ7	FALSE	0	-0.10405	0.40222	0.149085	0.260162	0.197676	1.45594	FALSE	FALSE	Stable	Stable
BORCS5	19.4694	19.3648	19.4673	19.0222	19.2315	19.0896	Q969J3	Q969J3	BORC5_HUMAN	BORCS5	BLOC-1-related complex subunit 5	Q969J3	FALSE	0	-0.480887	-0.157912	-0.3194	0.00825148	0.00307212	-4.88945	FALSE	FALSE	Stable	Stable
BORCS6	19.8847	19.8425	20.04	19.6605	19.7157	19.6012	Q96GS4	Q96GS4	BORC6_HUMAN	BORCS6	BLOC-1-related complex subunit 6	Q96GS4	FALSE	0	-0.420795	-0.105706	-0.263251	0.0154204	0.00671228	-4.13076	FALSE	FALSE	Stable	Stable
BORCS7	19.6036	19.6889	19.8194	19.3579	19.5127	19.5204	Q96B45	Q96B45	BORC7_HUMAN	BORCS7	BLOC-1-related complex subunit 7	Q96B45	FALSE	0	-0.423273	-0.0572973	-0.240285	0.035249	0.0186118	-3.24615	FALSE	FALSE	Stable	Stable
BPGM	20.3678	20.2715	16.1093	19.9941	20.0181	20.0269	P07738	P07738	PMGE_HUMAN	BPGM	Bisphosphoglycerate mutase	P07738	TRUE	1	-1.79643	3.99007	1.09682	0.456983	0.386302	0.937156	FALSE	FALSE	Stable	Stable
BPHL	17.7242	17.5593	17.7787	16.3721	15.9906	16.0622	Q86WA6	Q86WA6	BPHL_HUMAN	BPHL	Valacyclovir hydrolase	Q86WA6	TRUE	3	-1.83131	-1.26021	-1.54576	0.000177371	1.48247e-05	-13.3822	TRUE	TRUE	Down	Down
BPNT1	22.768	22.7565	22.7389	22.6934	22.7023	22.6342	O95861	O95861	BPNT1_HUMAN	BPNT1	3'(2'),5'-bisphosphate nucleotidase 1	O95861	FALSE	0	-0.162172	0.00654656	-0.0778129	0.100799	0.0646076	-2.28025	FALSE	FALSE	Stable	Stable
BPNT2	21.5203	21.4293	21.4277	21.6524	21.5393	21.6107	Q9NX62	Q9NX62	IMPA3_HUMAN	BPNT2	Golgi-resident adenosine 3',5'-bisphosphate 3'-phosphatase	Q9NX62	FALSE	0	0.0255643	0.257772	0.141668	0.044548	0.024738	3.0164	FALSE	FALSE	Stable	Stable
BPTF	20.5265	20.5147	20.5467	20.2704	20.3008	20.2245	Q12830	Q12830	BPTF_HUMAN	BPTF	Nucleosome-remodeling factor subunit BPTF	Q12830	FALSE	0	-0.349746	-0.178436	-0.264091	0.00145596	0.000323568	-7.62194	FALSE	FALSE	Stable	Stable
BRAF	19.7427	20.1518	20.2166	19.9593	20.3923	20.6975	P15056	P15056	BRAF_HUMAN	BRAF	Serine/threonine-protein kinase B-raf	P15056	FALSE	0	-0.228703	0.853987	0.312642	0.267904	0.205294	1.4277	FALSE	FALSE	Stable	Stable
BRAP	19.3725	19.4381	19.3314	19.4299	19.584	19.4653	Q7Z569	Q7Z569	BRAP_HUMAN	BRAP	BRCA1-associated protein	Q7Z569	FALSE	0	-0.0225143	0.247291	0.112388	0.129447	0.0870868	2.05951	FALSE	FALSE	Stable	Stable
BRAT1	21.6389	21.6585	21.6782	21.959	22.0059	22.0025	Q6PJG6	Q6PJG6	BRAT1_HUMAN	BRAT1	BRCA1-associated ATM activator 1	Q6PJG6	FALSE	0	0.250704	0.410552	0.330628	0.000485789	6.60022e-05	10.2265	FALSE	FALSE	Stable	Stable
BRCA1	20.5236	20.5548	20.4869	20.2905	20.4117	20.3568	P38398	P38398	BRCA1_HUMAN	BRCA1	Breast cancer type 1 susceptibility protein	P38398	FALSE	0	-0.276997	-0.060454	-0.168725	0.0196332	0.00913267	-3.85239	FALSE	FALSE	Stable	Stable
BRCA2	18.2041	18.0377	18.2599	17.8266	18.1297	18.1309	P51587	P51587	BRCA2_HUMAN	BRCA2	Breast cancer type 2 susceptibility protein	P51587	FALSE	0	-0.397565	0.121235	-0.138165	0.3028	0.237912	-1.31672	FALSE	FALSE	Stable	Stable
BRCC3	21.4685	21.3991	21.4738	21.23	21.3003	21.1971	P46736	P46736	BRCC3_HUMAN	BRCC3	Lys-63-specific deubiquitinase BRCC36	P46736	FALSE	0	-0.31081	-0.0985096	-0.20466	0.0090874	0.00346878	-4.76624	FALSE	FALSE	Stable	Stable
BRD1	20.4464	20.506	20.5074	20.468	20.5082	20.4933	O95696	O95696	BRD1_HUMAN	BRD1	Bromodomain-containing protein 1	O95696	FALSE	0	-0.0814063	0.0879604	0.00327704	0.941211	0.92703	0.0956639	FALSE	FALSE	Stable	Stable
BRD2	21.7056	21.7297	21.7682	21.888	21.8516	21.694	P25440	P25440	BRD2_HUMAN	BRD2	Bromodomain-containing protein 2	P25440	FALSE	0	-0.069361	0.222777	0.0767082	0.30911	0.243785	1.29822	FALSE	FALSE	Stable	Stable
BRD3	21.0698	20.9248	21.1814	20.6947	20.658	20.7338	Q15059	Q15059	BRD3_HUMAN	BRD3	Bromodomain-containing protein 3	Q15059	FALSE	0	-0.53731	-0.189052	-0.363181	0.00672731	0.00237856	-5.15604	FALSE	FALSE	Stable	Stable
BRD4	21.6619	21.7865	21.8584	21.4976	21.5988	21.5163	O60885	O60885	BRD4_HUMAN	BRD4	Bromodomain-containing protein 4	O60885	FALSE	0	-0.382989	-0.079815	-0.231402	0.0210965	0.0099845	-3.77372	FALSE	FALSE	Stable	Stable
BRD7	19.5026	19.5002	19.4309	19.3068	19.5499	19.3693	Q9NPI1	Q9NPI1	BRD7_HUMAN	BRD7	Bromodomain-containing protein 7	Q9NPI1	FALSE	0	-0.241789	0.10333	-0.0692292	0.43119	0.361137	-0.991779	FALSE	FALSE	Stable	Stable
BRD8	20.3603	20.3629	20.4594	20.5522	20.5542	20.5851	Q9H0E9	Q9H0E9	BRD8_HUMAN	BRD8	Bromodomain-containing protein 8	Q9H0E9	FALSE	0	0.0702833	0.269039	0.169661	0.0142392	0.00609359	4.22043	FALSE	FALSE	Stable	Stable
BRD9	19.1901	19.4333	19.8451	19.7969	20.1453	19.9756	Q9H8M2	Q9H8M2	BRD9_HUMAN	BRD9	Bromodomain-containing protein 9	Q9H8M2	FALSE	0	0.032623	0.93358	0.483102	0.066646	0.0395029	2.65111	FALSE	FALSE	Stable	Stable
BRF1	18.8755	18.7757	18.6772	19.1335	19.0158	18.9172	Q92994	Q92994	TF3B_HUMAN	BRF1	Transcription factor IIIB 90 kDa subunit	Q92994	FALSE	0	0.0578877	0.434146	0.246017	0.0357697	0.018919	3.23276	FALSE	FALSE	Stable	Stable
BRF2	18.4847	18.3476	18.3962	18.3189	18.4347	18.5425	Q9HAW0	Q9HAW0	BRF2_HUMAN	BRF2	Transcription factor IIIB 50 kDa subunit	Q9HAW0	FALSE	0	-0.148993	0.193977	0.022492	0.800183	0.757211	0.324239	FALSE	FALSE	Stable	Stable
BRI3BP	21.1649	21.4086	21.4754	21.9893	21.7525	21.7529	Q8WY22	Q8WY22	BRI3B_HUMAN	BRI3BP	BRI3-binding protein	Q8WY22	FALSE	0	0.219128	0.744768	0.481948	0.0110017	0.00438936	4.5332	FALSE	FALSE	Stable	Stable
BRIP1	21.6908	21.8259	21.7329	21.6708	21.7243	21.8228	Q9BX63	Q9BX63	FANCJ_HUMAN	BRIP1	Fanconi anemia group J protein	Q9BX63	FALSE	0	-0.152165	0.131068	-0.0105483	0.885305	0.860222	-0.184133	FALSE	FALSE	Stable	Stable
BRIX1	22.5872	22.662	22.7135	23.2825	23.3723	23.5267	Q8TDN6	Q8TDN6	BRX1_HUMAN	BRIX1	Ribosome biogenesis protein BRX1 homolog	Q8TDN6	FALSE	0	0.56023	0.918984	0.739607	0.000489563	6.72085e-05	10.1929	TRUE	TRUE	Up	Up
BRK1	22.7105	22.6387	22.4729	22.4767	22.493	22.6552	Q8WUW1	Q8WUW1	BRK1_HUMAN	BRK1	Protein BRICK1	Q8WUW1	FALSE	0	-0.264884	0.1335	-0.0656918	0.517496	0.447319	-0.815273	FALSE	FALSE	Stable	Stable
BRMS1L	19.1952	19.4299	19.4148	18.7574	19.2743	19.2262	Q5PSV4	Q5PSV4	BRM1L_HUMAN	BRMS1L	Breast cancer metastasis-suppressor 1-like protein	Q5PSV4	FALSE	0	-0.64109	0.11977	-0.26066	0.198202	0.143323	-1.69381	FALSE	FALSE	Stable	Stable
BROX	22.1471	22.0111	22.1034	22.0641	22.058	22.1161	Q5VW32	Q5VW32	BROX_HUMAN	BROX	BRO1 domain-containing protein BROX	Q5VW32	FALSE	0	-0.122435	0.106818	-0.00780868	0.895433	0.872023	-0.168405	FALSE	FALSE	Stable	Stable
BRPF1	19.2899	19.142	18.8997	18.7885	19.0021	18.7059	P55201	P55201	BRPF1_HUMAN	BRPF1	Peregrin	P55201	FALSE	0	-0.583079	0.0263163	-0.278382	0.103325	0.0665193	-2.25858	FALSE	FALSE	Stable	Stable
BRPF3	18.8561	18.7049	19.1531	18.8078	18.9238	18.8429	Q9ULD4	Q9ULD4	BRPF3_HUMAN	BRPF3	Bromodomain and PHD finger-containing protein 3	Q9ULD4	FALSE	0	-0.335419	0.24234	-0.0465394	0.754224	0.704784	-0.398261	FALSE	FALSE	Stable	Stable
BRWD1	17.8654	17.792	17.7784	17.5531	17.7957	17.646	Q9NSI6	Q9NSI6	BRWD1_HUMAN	BRWD1	Bromodomain and WD repeat-containing protein 1	Q9NSI6	FALSE	0	-0.317818	0.0238839	-0.146967	0.119986	0.0795169	-2.12651	FALSE	FALSE	Stable	Stable
BSCL2	21.1424	21.0832	21.0827	21.2543	21.2919	21.0496	Q96G97	Q96G97	BSCL2_HUMAN	BSCL2	Seipin	Q96G97	FALSE	0	-0.0790718	0.270795	0.0958618	0.290186	0.226258	1.35468	FALSE	FALSE	Stable	Stable
BSDC1	20.4672	20.4668	20.53	20.9022	20.6192	20.4161	Q9NW68	Q9NW68	BSDC1_HUMAN	BSDC1	BSD domain-containing protein 1	Q9NW68	FALSE	0	-0.143958	0.459701	0.157872	0.310772	0.245456	1.29302	FALSE	FALSE	Stable	Stable
BSG	24.2898	24.3447	24.2955	24.7023	24.6821	24.6562	P35613	P35613	BASI_HUMAN	BSG	Basigin	P35613	FALSE	0	0.287035	0.453375	0.370205	0.000367888	4.4074e-05	11.0037	FALSE	FALSE	Stable	Stable
BST1	20.422	20.4236	20.4848	19.4988	19.6095	19.5857	Q10588	Q10588	BST1_HUMAN	BST1	ADP-ribosyl cyclase/cyclic ADP-ribose hydrolase 2	Q10588	FALSE	0	-0.98599	-0.771534	-0.878762	4.36867e-05	1.42341e-06	-20.2595	TRUE	TRUE	Down	Down
BST2	21.2339	21.2854	21.2375	21.8657	21.8382	21.9439	Q10589	Q10589	BST2_HUMAN	BST2	Bone marrow stromal antigen 2	Q10589	FALSE	0	0.528854	0.731821	0.630337	0.000111146	6.84496e-06	15.3547	TRUE	TRUE	Up	Up
BTAF1	21.043	20.9633	20.9699	21.1662	21.1584	21.1876	O14981	O14981	BTAF1_HUMAN	BTAF1	TATA-binding protein-associated factor 172	O14981	FALSE	0	0.0894283	0.267969	0.178699	0.00788288	0.00290037	4.94855	FALSE	FALSE	Stable	Stable
BTBD10	19.0481	18.9821	19.047	19.2655	19.371	19.1405	Q9BSF8	Q9BSF8	BTBDA_HUMAN	BTBD10	BTB/POZ domain-containing protein 10	Q9BSF8	FALSE	0	0.0728622	0.393716	0.233289	0.0250417	0.0122722	3.59485	FALSE	FALSE	Stable	Stable
BTBD2	19.6164	19.4808	19.6075	19.4194	19.4308	19.6443	Q9BX70	Q9BX70;Q9H0C5	BTBD2_HUMAN	BTBD2	BTB/POZ domain-containing protein 2	Q9BX70	FALSE	0	-0.259091	0.118931	-0.0700799	0.467542	0.396131	-0.916578	FALSE	FALSE	Stable	Stable
BTD	19.9315	20.0685	19.9461	20.2117	19.5429	19.7124	P43251	P43251	BTD_HUMAN	BTD	Biotinidase	P43251	FALSE	0	-0.588623	0.269256	-0.159684	0.46557	0.394341	-0.920297	FALSE	FALSE	Stable	Stable
BTF3	25.1348	25.2429	25.0164	25.1156	25.4267	25.33	P20290	P20290	BTF3_HUMAN	BTF3	Transcription factor BTF3	P20290	FALSE	0	-0.0833126	0.40207	0.159379	0.21505	0.157694	1.62345	FALSE	FALSE	Stable	Stable
BTF3L4	23.9033	24.1481	24.0892	24.0088	24.1015	24.0157	Q96K17	Q96K17	BT3L4_HUMAN	BTF3L4	Transcription factor BTF3 homolog 4	Q96K17	FALSE	0	-0.183033	0.173358	-0.00483751	0.958006	0.948763	-0.0671104	FALSE	FALSE	Stable	Stable
BTN2A1	21.3989	21.3368	21.1816	21.6663	21.7149	21.7458	Q7KYR7	Q7KYR7	BT2A1_HUMAN	BTN2A1	Butyrophilin subfamily 2 member A1	Q7KYR7	FALSE	0	0.245513	0.560948	0.40323	0.00303309	0.000859741	6.3203	FALSE	FALSE	Stable	Stable
BTN3A1	18.714	18.7263	18.7849	18.9297	18.6617	18.7499	O00481	O00481	BT3A1_HUMAN	BTN3A1	Butyrophilin subfamily 3 member A1	O00481	FALSE	0	-0.143808	0.221263	0.0387273	0.677151	0.619508	0.524487	FALSE	FALSE	Stable	Stable
BTN3A2	20.5055	20.3579	20.4424	20.4136	20.3464	20.326	P78410	O00478;O00481;P78410	BT3A2_HUMAN	BTN3A2	Butyrophilin subfamily 3 member A2	P78410	FALSE	0	-0.198217	0.0516914	-0.0732627	0.261867	0.19941	-1.44943	FALSE	FALSE	Stable	Stable
BUB1	19.7192	19.8588	19.9007	19.5487	19.7549	19.6019	O43683	O43683	BUB1_HUMAN	BUB1	Mitotic checkpoint serine/threonine-protein kinase BUB1	O43683	FALSE	0	-0.375148	-0.00705756	-0.191103	0.0731621	0.0441139	-2.56689	FALSE	FALSE	Stable	Stable
BUB1B	21.3832	21.3762	21.4138	21.1551	21.1825	21.1418	O60566	O60566	BUB1B_HUMAN	BUB1B	Mitotic checkpoint serine/threonine-protein kinase BUB1 beta	O60566	FALSE	0	-0.309021	-0.153442	-0.231232	0.00167791	0.000392577	-7.34837	FALSE	FALSE	Stable	Stable
BUB3	24.1255	24.1102	24.1191	24.2669	24.2393	24.2158	O43684	O43684	BUB3_HUMAN	BUB3	Mitotic checkpoint protein BUB3	O43684	FALSE	0	0.0456796	0.199088	0.122384	0.0181136	0.00823917	3.94429	FALSE	FALSE	Stable	Stable
BUD13	19.7876	20.0338	19.9144	19.9427	19.9687	20.0246	Q9BRD0	Q9BRD0	BUD13_HUMAN	BUD13	BUD13 homolog	Q9BRD0	FALSE	0	-0.103004	0.236491	0.0667433	0.44029	0.370093	0.972003	FALSE	FALSE	Stable	Stable
BUD23	20.2311	20.2072	19.615	20.3646	20.1736	20.3262	O43709	O43709	BUD23_HUMAN	BUD23	Probable 18S rRNA (guanine-N(7))-methyltransferase	O43709	FALSE	0	-0.167454	0.708285	0.270415	0.240143	0.179741	1.52669	FALSE	FALSE	Stable	Stable
BUD31	22.2084	22.2255	22.2731	22.1087	22.1571	22.1248	P41223	P41223	BUD31_HUMAN	BUD31	Protein BUD31 homolog	P41223	FALSE	0	-0.19105	-0.0198961	-0.105473	0.0430508	0.0238124	-3.04683	FALSE	FALSE	Stable	Stable
BYSL	22.4099	22.2055	22.3256	22.7847	22.7862	22.8031	Q13895	Q13895	BYST_HUMAN	BYSL	Bystin	Q13895	FALSE	0	0.336457	0.618901	0.477679	0.00101028	0.000197287	8.36175	FALSE	FALSE	Stable	Stable
BZW1	23.6651	23.6535	23.688	23.398	23.3098	23.3077	Q7L1Q6	Q7L1Q6	5MP2_HUMAN	BZW1	eIF5-mimic protein 2	Q7L1Q6	FALSE	0	-0.425631	-0.235153	-0.330392	0.000916417	0.000172172	-8.57592	FALSE	FALSE	Stable	Stable
BZW2	23.8061	23.7221	23.7849	23.4286	23.2871	23.3201	Q9Y6E2	Q9Y6E2	5MP1_HUMAN	BZW2	eIF5-mimic protein 1	Q9Y6E2	FALSE	0	-0.549632	-0.301936	-0.425784	0.000944484	0.000180747	-8.49893	FALSE	FALSE	Stable	Stable
C11orf54	21.9451	21.8192	21.7256	21.8048	21.9105	21.8794	Q9H0W9	Q9H0W9	CK054_HUMAN	C11orf54	Ester hydrolase C11orf54	Q9H0W9	FALSE	0	-0.126972	0.196822	0.0349249	0.671456	0.61378	0.533287	FALSE	FALSE	Stable	Stable
C11orf68	16.9838	17.063	17.1829	17.4137	17.6409	17.305	Q9H3H3	Q9H3H3	CK068_HUMAN	C11orf68	UPF0696 protein C11orf68	Q9H3H3	FALSE	0	0.130324	0.622957	0.37664	0.0210185	0.00991268	3.78006	FALSE	FALSE	Stable	Stable
C11orf98	22.085	22.1615	22.0478	22.0572	22.1431	22.0932	E9PRG8	E9PRG8	CK098_HUMAN	C11orf98	Uncharacterized protein C11orf98	E9PRG8	FALSE	0	-0.11104	0.11047	-0.000285005	0.996551	0.995139	-0.0063614	FALSE	FALSE	Stable	Stable
C12orf29	20.4018	20.304	20.5699	20.6567	20.6773	20.5696	Q8N999	Q8N999	CL029_HUMAN	C12orf29	Uncharacterized protein C12orf29	Q8N999	FALSE	0	0.0219882	0.396631	0.20931	0.05882	0.0341936	2.76227	FALSE	FALSE	Stable	Stable
C12orf4	17.7827	17.8347	17.5775	17.5011	16.6451	17.1413	Q9NQ89	Q9NQ89	CL004_HUMAN	C12orf4	Protein C12orf4	Q9NQ89	FALSE	0	-1.17657	-0.09503	-0.635798	0.0501601	0.028423	-2.90651	FALSE	FALSE	Stable	Stable
C12orf57	21.7602	21.1911	21.1071	20.6273	20.9814	20.9262	Q99622	Q99622	C10_HUMAN	C12orf57	Protein C10	Q99622	FALSE	0	-0.992436	-0.0231516	-0.507794	0.0713727	0.0427836	-2.59018	FALSE	FALSE	Stable	Stable
C14orf119	20.6235	20.5962	20.2107	20.3078	20.3814	20.0461	Q9NWQ9	Q9NWQ9	CN119_HUMAN	C14orf119	Uncharacterized protein C14orf119	Q9NWQ9	FALSE	0	-0.584202	0.120785	-0.231708	0.214635	0.157362	-1.62501	FALSE	FALSE	Stable	Stable
C16orf87	19.451	19.3977	19.3284	18.9351	19.2357	19.0135	Q6PH81	Q6PH81	CP087_HUMAN	C16orf87	UPF0547 protein C16orf87	Q6PH81	FALSE	0	-0.542191	-0.119678	-0.330935	0.0192942	0.00892777	-3.87255	FALSE	FALSE	Stable	Stable
C17orf75	21.2579	21.1609	21.1612	21.5619	21.4835	21.5991	Q9HAS0	Q9HAS0	NJMU_HUMAN	C17orf75	Protein Njmu-R1	Q9HAS0	FALSE	0	0.235533	0.474118	0.354826	0.00167762	0.000391266	7.35303	FALSE	FALSE	Stable	Stable
C17orf80	19.8693	19.7534	19.8102	19.9798	20.02	20.0569	Q9BSJ5	Q9BSJ5	CQ080_HUMAN	C17orf80	Uncharacterized protein C17orf80	Q9BSJ5	FALSE	0	0.0995735	0.316249	0.207911	0.00923612	0.00354577	4.74419	FALSE	FALSE	Stable	Stable
C18orf21	19.1992	18.9791	19.0852	19.3116	19.2356	19.4844	Q32NC0	Q32NC0	CR021_HUMAN	C18orf21	UPF0711 protein C18orf21	Q32NC0	FALSE	0	0.0438572	0.468268	0.256063	0.0461388	0.0257997	2.983	FALSE	FALSE	Stable	Stable
C18orf25	21.9812	22.2903	22.1734	21.8108	21.8645	21.7816	Q96B23	Q96B23	CR025_HUMAN	C18orf25	Uncharacterized protein C18orf25	Q96B23	FALSE	0	-0.533946	-0.124739	-0.329343	0.0175383	0.00792556	-3.97923	FALSE	FALSE	Stable	Stable
C18orf32	16.8916	16.5905	15.8361	16.8075	16.0361	15.9798	Q8TCD1	Q8TCD1	CR032_HUMAN	C18orf32	UPF0729 protein C18orf32	Q8TCD1	TRUE	2	-1.01694	0.687043	-0.164949	0.705449	0.649849	-0.478606	FALSE	FALSE	Stable	Stable
C19orf12	18.2756	18.3103	18.5703	17.4818	18.0564	17.933	Q9NSK7	Q9NSK7	CS012_HUMAN	C19orf12	Protein C19orf12	Q9NSK7	FALSE	0	-0.975322	-0.14806	-0.561691	0.0314764	0.0162712	-3.35697	FALSE	FALSE	Stable	Stable
C19orf25	18.5051	18.8348	18.7437	18.5519	18.922	19.0293	Q9UFG5	Q9UFG5	CS025_HUMAN	C19orf25	UPF0449 protein C19orf25	Q9UFG5	FALSE	0	-0.22709	0.506854	0.139882	0.454315	0.383872	0.942308	FALSE	FALSE	Stable	Stable
C19orf47	18.9846	19.0352	19.1781	18.8782	18.918	18.7971	Q8N9M1	Q8N9M1	CS047_HUMAN	C19orf47	Uncharacterized protein C19orf47	Q8N9M1	FALSE	0	-0.358057	-0.0449869	-0.201522	0.0375501	0.0201213	-3.18255	FALSE	FALSE	Stable	Stable
C19orf54	20.279	20.1157	20.2741	20.1579	20.1428	19.9906	Q5BKX5	Q5BKX5	CS054_HUMAN	C19orf54	UPF0692 protein C19orf54	Q5BKX5	FALSE	0	-0.296736	0.0450145	-0.125861	0.171313	0.120548	-1.82085	FALSE	FALSE	Stable	Stable
C1D	22.6046	22.5299	22.4462	22.4609	22.4404	22.5256	Q13901	Q13901	C1D_HUMAN	C1D	Nuclear nucleic acid-binding protein C1D	Q13901	FALSE	0	-0.17997	0.0774684	-0.051251	0.434712	0.364509	-0.984289	FALSE	FALSE	Stable	Stable
C1GALT1	20.8283	20.7203	20.8721	21.0966	20.9892	20.9346	Q9NS00	Q9NS00	C1GLT_HUMAN	C1GALT1	Glycoprotein-N-acetylgalactosamine 3-beta-galactosyltransferase 1	Q9NS00	FALSE	0	0.0478113	0.352006	0.199909	0.0351445	0.0185431	3.24918	FALSE	FALSE	Stable	Stable
C1GALT1C1	20.1565	20.1173	20.223	20.4443	20.288	20.3103	Q96EU7	Q96EU7	C1GLC_HUMAN	C1GALT1C1	C1GALT1-specific chaperone 1	Q96EU7	FALSE	0	0.0439945	0.319863	0.181929	0.0347105	0.0182873	3.26057	FALSE	FALSE	Stable	Stable
C1orf109	18.0687	17.8615	17.9499	17.7323	17.4967	17.7459	Q9NX04	Q9NX04	CA109_HUMAN	C1orf109	Ribosome biogenesis protein C1orf109	Q9NX04	FALSE	0	-0.520774	-0.0827866	-0.30178	0.0299918	0.01533	-3.40662	FALSE	FALSE	Stable	Stable
C1orf112	21.6003	21.6515	21.729	21.7027	21.8107	21.6741	Q9NSG2	Q9NSG2	CA112_HUMAN	C1orf112	Uncharacterized protein C1orf112	Q9NSG2	FALSE	0	-0.0659111	0.203632	0.0688602	0.321549	0.255293	1.26309	FALSE	FALSE	Stable	Stable
C1orf122	20.7645	20.9781	21.0218	21.0113	21.2451	20.9494	Q6ZSJ8	Q6ZSJ8	CA122_HUMAN	C1orf122	Uncharacterized protein C1orf122	Q6ZSJ8	FALSE	0	-0.110005	0.404239	0.147117	0.271789	0.208959	1.41445	FALSE	FALSE	Stable	Stable
C1orf131	18.9986	19.0417	18.8057	19.2192	19.0586	18.9959	Q8NDD1	Q8NDD1	CA131_HUMAN	C1orf131	Uncharacterized protein C1orf131	Q8NDD1	FALSE	0	-0.0718915	0.357055	0.142582	0.210008	0.153474	1.64344	FALSE	FALSE	Stable	Stable
C1orf159	18.6965	18.8912	18.7317	18.556	18.6628	18.6945	Q96HA4	Q96HA4	CA159_HUMAN	C1orf159	Uncharacterized protein C1orf159	Q96HA4	FALSE	0	-0.301435	0.0305772	-0.135429	0.136053	0.0923022	-2.01675	FALSE	FALSE	Stable	Stable
C1orf174	19.0066	19.1226	18.7671	18.4545	18.6812	18.4769	Q8IYL3	Q8IYL3	CA174_HUMAN	C1orf174	UPF0688 protein C1orf174	Q8IYL3	FALSE	0	-0.698953	-0.156834	-0.427894	0.0188047	0.00863345	-3.90242	FALSE	FALSE	Stable	Stable
C1orf198	19.3552	19.6836	19.3904	18.9421	19.3866	18.9576	Q9H425	Q9H425	CA198_HUMAN	C1orf198	Uncharacterized protein C1orf198	Q9H425	FALSE	0	-0.75634	-0.00548986	-0.380915	0.0781953	0.0476624	-2.50824	FALSE	FALSE	Stable	Stable
C1orf21	18.3561	18.473	18.4424	18.3956	18.4781	18.7047	Q9H246	Q9H246	CA021_HUMAN	C1orf21	Uncharacterized protein C1orf21	Q9H246	FALSE	0	-0.112976	0.317607	0.102316	0.354951	0.286346	1.17484	FALSE	FALSE	Stable	Stable
C1orf216	16.4304	15.9752	15.9795	16.0775	15.9967	16.147	Q8TAB5	Q8TAB5	CA216_HUMAN	C1orf216	UPF0500 protein C1orf216	Q8TAB5	TRUE	3	-0.385851	0.27653	-0.0546603	0.74811	0.698011	-0.407998	FALSE	FALSE	Stable	Stable
C1orf43	17.6832	17.3609	17.4697	17.9577	17.9673	18.1091	Q9BWL3	Q9BWL3	CA043_HUMAN	C1orf43	Protein C1orf43	Q9BWL3	FALSE	0	0.276317	0.737117	0.506717	0.00547554	0.00183441	5.43684	TRUE	TRUE	Up	Up
C1orf50	19.3241	19.3407	19.3565	19.2477	19.312	19.2084	Q9BV19	Q9BV19	CA050_HUMAN	C1orf50	Uncharacterized protein C1orf50	Q9BV19	FALSE	0	-0.179884	0.0111003	-0.0843919	0.112399	0.0734898	-2.18473	FALSE	FALSE	Stable	Stable
C1QBP	25.4191	25.7441	25.7771	25.9535	26.0497	26.0084	Q07021	Q07021	C1QBP_HUMAN	C1QBP	Complement component 1 Q subcomponent-binding protein, mitochondrial	Q07021	FALSE	0	0.104979	0.609224	0.357102	0.0273879	0.0136957	3.50141	FALSE	FALSE	Stable	Stable
C1R	19.5932	19.5931	19.6354	18.6324	18.164	18.1221	P00736	P00736	C1R_HUMAN	C1R	Complement C1r subcomponent	P00736	FALSE	0	-1.64649	-0.955699	-1.30109	0.000679505	0.000110173	-9.31228	TRUE	TRUE	Down	Down
C1RL	17.5574	17.8501	17.8873	16.3493	16.4957	16.1576	Q9NZP8	Q9NZP8	C1RL_HUMAN	C1RL	Complement C1r subcomponent-like protein	Q9NZP8	FALSE	0	-1.73369	-1.12781	-1.43075	0.000294798	3.17388e-05	-11.6753	TRUE	TRUE	Down	Down
C20orf27	19.8016	19.8358	19.8061	20.3025	20.1951	20.3429	Q9GZN8	Q9GZN8	CT027_HUMAN	C20orf27	UPF0687 protein C20orf27	Q9GZN8	FALSE	0	0.349007	0.582373	0.46569	0.000550718	8.03559e-05	9.86626	FALSE	FALSE	Stable	Stable
C20orf85	19.8558	19.8885	16.0318	20.2809	20.0819	20.6123	Q9H1P6	Q9H1P6	CT085_HUMAN	C20orf85	Uncharacterized protein C20orf85	Q9H1P6	TRUE	1	-0.924791	4.39082	1.73301	0.217675	0.16018	1.61192	FALSE	FALSE	Stable	Stable
C2CD2	19.848	20.1008	19.9684	19.819	19.6883	19.6623	Q9Y426	Q9Y426	C2CD2_HUMAN	C2CD2	C2 domain-containing protein 2	Q9Y426	FALSE	0	-0.442741	-0.0555532	-0.249147	0.0375716	0.0201479	-3.18147	FALSE	FALSE	Stable	Stable
C2CD2L	19.1029	19.1385	19.1018	19.9051	19.84	19.8836	O14523	O14523	C2C2L_HUMAN	C2CD2L	Phospholipid transfer protein C2CD2L	O14523	FALSE	0	0.67787	0.845797	0.761834	3.17456e-05	7.97218e-07	22.4303	TRUE	TRUE	Up	Up
C2CD5	21.5853	21.5362	21.6339	21.6148	21.5817	21.6213	Q86YS7	Q86YS7	C2CD5_HUMAN	C2CD5	C2 domain-containing protein 5	Q86YS7	FALSE	0	-0.0735151	0.115113	0.0207991	0.665015	0.606093	0.545168	FALSE	FALSE	Stable	Stable
C2CD6	18.7932	18.1853	18.6675	18.447	17.5416	17.65	Q53TS8	Q53TS8	CTSRT_HUMAN	C2CD6	Cation channel sperm-associated targeting subunit tau	Q53TS8	FALSE	0	-1.37379	0.0355074	-0.669142	0.093412	0.0590306	-2.34752	FALSE	FALSE	Stable	Stable
C2orf49	20.9479	21.1279	21.08	20.7022	20.5075	20.2827	Q9BVC5	Q9BVC5	ASHWN_HUMAN	C2orf49	Ashwin	Q9BVC5	FALSE	0	-0.836519	-0.272458	-0.554488	0.00844981	0.0031612	-4.86026	TRUE	TRUE	Down	Down
C2orf69	18.1178	18.4732	17.8667	17.9193	17.796	18.4767	Q8N8R5	Q8N8R5	CB069_HUMAN	C2orf69	Mitochondrial protein C2orf69	Q8N8R5	FALSE	0	-0.656457	0.479275	-0.0885912	0.761863	0.713591	-0.385664	FALSE	FALSE	Stable	Stable
C3	20.2249	20.2595	20.2174	19.4759	19.4448	19.3874	P01024	P01024	CO3_HUMAN	C3	Complement C3	P01024	FALSE	0	-0.889775	-0.70605	-0.797912	3.78017e-05	1.02232e-06	-21.4724	TRUE	TRUE	Down	Down
C3orf38	19.7116	19.5035	19.5206	19.1343	19.4157	19.3618	Q5JPI3	Q5JPI3	CC038_HUMAN	C3orf38	Uncharacterized protein C3orf38	Q5JPI3	FALSE	0	-0.509884	-0.039423	-0.274653	0.0512516	0.0291603	-2.88639	FALSE	FALSE	Stable	Stable
C4A	20.681	20.5141	20.6484	19.5904	19.695	19.5332	P0C0L4;P0C0L5	P0C0L4;P0C0L5	CO4A_HUMAN;CO4B_HUMAN	C4A;C4B_2	Complement C4-A	P0C0L4	FALSE	0	-1.16788	-0.848649	-1.00827	0.000104164	6.22436e-06	-15.6156	TRUE	TRUE	Down	Down
C5	20.5759	20.911	20.9423	21.2304	21.0928	21.1508	P01031	P01031	CO5_HUMAN	C5	Complement C5	P01031	FALSE	0	0.083707	0.612856	0.348281	0.0349699	0.0184295	3.25422	FALSE	FALSE	Stable	Stable
C5orf22	21.2631	21.2828	21.2888	22.1396	21.9947	21.9972	Q49AR2	Q49AR2	CE022_HUMAN	C5orf22	UPF0489 protein C5orf22	Q49AR2	FALSE	0	0.643694	0.887501	0.765598	0.000106245	6.43078e-06	15.5256	TRUE	TRUE	Up	Up
C5orf24	18.2567	18.4718	17.9376	17.4893	17.1671	17.6619	Q7Z6I8	Q7Z6I8	CE024_HUMAN	C5orf24	UPF0461 protein C5orf24	Q7Z6I8	FALSE	0	-1.2257	-0.339425	-0.782565	0.0126205	0.00522372	-4.3656	FALSE	FALSE	Down	Stable
C6orf120	19.1099	19.5397	19.0147	19.7016	19.9422	19.8941	Q7Z4R8	Q7Z4R8	CF120_HUMAN	C6orf120	UPF0669 protein C6orf120	Q7Z4R8	FALSE	0	0.25232	0.996725	0.624523	0.0151742	0.00658844	4.14794	FALSE	FALSE	Up	Stable
C6orf132	18.5552	18.6493	18.6826	18.227	17.8512	17.8061	Q5T0Z8	Q5T0Z8	CF132_HUMAN	C6orf132	Uncharacterized protein C6orf132	Q5T0Z8	FALSE	0	-0.961975	-0.373301	-0.667638	0.00484301	0.001574	-5.60738	TRUE	TRUE	Down	Down
C6orf47	18.8016	19.268	19.0488	19.2513	19.1205	19.4313	O95873	O95873	CF047_HUMAN	C6orf47	Uncharacterized protein C6orf47	O95873	FALSE	0	-0.112917	0.569367	0.228225	0.20764	0.151324	1.65384	FALSE	FALSE	Stable	Stable
C6orf89	18.542	18.4413	18.4136	18.449	18.6364	18.5418	Q6UWU4	Q6UWU4	CF089_HUMAN	C6orf89	Bombesin receptor-activated protein C6orf89	Q6UWU4	FALSE	0	-0.0774442	0.230862	0.076709	0.333958	0.266522	1.23015	FALSE	FALSE	Stable	Stable
C7orf25	20.5157	20.4065	20.362	20.7044	20.6514	20.7671	Q9BPX7	Q9BPX7	CG025_HUMAN	C7orf25	UPF0415 protein C7orf25	Q9BPX7	FALSE	0	0.143707	0.415514	0.27961	0.00707058	0.0025414	5.08611	FALSE	FALSE	Stable	Stable
C7orf50	21.5717	21.4334	21.4457	21.6396	21.4865	21.7162	Q9BRJ6	Q9BRJ6	CG050_HUMAN	C7orf50	Uncharacterized protein C7orf50	Q9BRJ6	FALSE	0	-0.0498672	0.310864	0.130499	0.177549	0.125965	1.78861	FALSE	FALSE	Stable	Stable
C8B	15.6219	15.8038	16.3014	16.4694	16.0725	17.2263	P07358	P07358	CO8B_HUMAN	C8B	Complement component C8 beta chain	P07358	FALSE	0	-0.135801	1.49662	0.68041	0.129254	0.0869368	2.06078	FALSE	FALSE	Stable	Stable
C8orf33	22.209	22.251	22.2377	21.9642	22.1511	22.0113	Q9H7E9	Q9H7E9	CH033_HUMAN	C8orf33	UPF0488 protein C8orf33	Q9H7E9	FALSE	0	-0.32784	-0.0528785	-0.190359	0.0295247	0.0150342	-3.42292	FALSE	FALSE	Stable	Stable
C8orf82	20.0931	20.2171	20.1912	19.4894	19.135	18.9637	Q6P1X6	Q6P1X6	CH082_HUMAN	C8orf82	UPF0598 protein C8orf82	Q6P1X6	FALSE	0	-1.30677	-0.635428	-0.971096	0.0018635	0.000452768	-7.1518	TRUE	TRUE	Down	Down
C9orf64	22.3779	22.2878	22.2824	22.1673	22.1357	22.1472	Q5T6V5	Q5T6V5	QSPP_HUMAN	C9orf64	Queuosine salvage protein	Q5T6V5	FALSE	0	-0.262398	-0.0694498	-0.165924	0.0138712	0.00589323	-4.25169	FALSE	FALSE	Stable	Stable
C9orf78	21.583	21.4419	21.6154	21.0348	21.4576	21.3752	Q9NZ63	Q9NZ63	TLS1_HUMAN	C9orf78	Telomere length and silencing protein 1 homolog	Q9NZ63	FALSE	0	-0.55424	0.0391271	-0.257556	0.117258	0.077437	-2.14606	FALSE	FALSE	Stable	Stable
CA13	19.7638	19.6428	19.6917	18.4246	18.3245	16.0154	Q8N1Q1	Q8N1Q1	CAH13_HUMAN	CA13	Carbonic anhydrase 13	Q8N1Q1	TRUE	1	-3.7358	-0.486767	-2.11128	0.0364408	0.0193866	-3.21282	FALSE	FALSE	Stable	Stable
CAAP1	19.9639	20.0891	20.2086	20.3435	20.4228	20.3825	Q9H8G2	Q9H8G2	CAAP1_HUMAN	CAAP1	Caspase activity and apoptosis inhibitor 1	Q9H8G2	FALSE	0	0.127524	0.463986	0.295755	0.0128314	0.00533252	4.346	FALSE	FALSE	Stable	Stable
CAB39	22.7818	22.6749	22.8008	22.6823	22.4345	22.5501	Q9Y376	Q9Y376	CAB39_HUMAN	CAB39	Calcium-binding protein 39	Q9Y376	FALSE	0	-0.378958	-0.0147319	-0.196845	0.0651114	0.038438	-2.67207	FALSE	FALSE	Stable	Stable
CAB39L	17.8565	17.7838	17.6067	17.6252	17.8017	18.0691	Q9H9S4	Q9H9S4	CB39L_HUMAN	CAB39L	Calcium-binding protein 39-like	Q9H9S4	FALSE	0	-0.231528	0.397561	0.0830162	0.604073	0.53927	0.652446	FALSE	FALSE	Stable	Stable
CABIN1	18.8819	18.8894	19.0237	18.4112	18.7042	18.6374	Q9Y6J0	Q9Y6J0	CABIN_HUMAN	CABIN1	Calcineurin-binding protein cabin-1	Q9Y6J0	FALSE	0	-0.564828	-0.130034	-0.347431	0.0180248	0.00818023	-3.95074	FALSE	FALSE	Stable	Stable
CABLES1	17.4193	17.3056	17.3405	17.9292	17.9809	18.0548	Q8TDN4	Q8TDN4	CABL1_HUMAN	CABLES1	CDK5 and ABL1 enzyme substrate 1	Q8TDN4	FALSE	0	0.509428	0.756952	0.63319	0.000218929	2.03281e-05	12.6477	TRUE	TRUE	Up	Up
CACHD1	18.2596	18.0198	18.2713	17.3548	17.2783	17.5904	Q5VU97	Q5VU97	CAHD1_HUMAN	CACHD1	VWFA and cache domain-containing protein 1	Q5VU97	FALSE	0	-1.04194	-0.509595	-0.775767	0.00181318	0.00043549	-7.20498	TRUE	TRUE	Down	Down
CACNB1	18.2856	18.3869	17.6318	16.036	15.7414	16.2717	Q02641	O00305;Q02641;Q08289	CACB1_HUMAN	CACNB1	Voltage-dependent L-type calcium channel subunit beta-1	Q02641	TRUE	3	-2.67032	-1.4998	-2.08506	0.00083548	0.000149127	-8.80711	TRUE	TRUE	Down	Down
CACNB3	18.2641	18.1377	18.2263	17.2936	17.2073	17.1921	P54284	P54284	CACB3_HUMAN	CACNB3	Voltage-dependent L-type calcium channel subunit beta-3	P54284	FALSE	0	-1.10116	-0.855608	-0.978383	4.79045e-05	1.66923e-06	-19.6998	TRUE	TRUE	Down	Down
CACTIN	17.7416	18.2595	17.8825	18.6088	17.5409	18.2304	Q8WUQ7	Q8WUQ7	CATIN_HUMAN	CACTIN	Cactin	Q8WUQ7	FALSE	0	-0.556459	0.887494	0.165518	0.65253	0.592277	0.566742	FALSE	FALSE	Stable	Stable
CACUL1	18.9068	18.9307	18.9434	19.2177	19.0678	18.9675	Q86Y37	Q86Y37	CACL1_HUMAN	CACUL1	CDK2-associated and cullin domain-containing protein 1	Q86Y37	FALSE	0	-0.00928317	0.324095	0.157406	0.0948224	0.0600761	2.33441	FALSE	FALSE	Stable	Stable
CACYBP	24.9497	24.9931	24.9496	25.5088	25.4342	25.5487	Q9HB71	Q9HB71	CYBP_HUMAN	CACYBP	Calcyclin-binding protein	Q9HB71	FALSE	0	0.43044	0.63579	0.533115	0.000208552	1.872e-05	12.8357	TRUE	TRUE	Up	Up
CAD	24.5145	24.4939	24.4725	24.6921	24.6733	24.6387	P27708	P27708	PYR1_HUMAN	CAD	CAD protein	P27708	FALSE	0	0.093569	0.255254	0.174411	0.0059119	0.00201645	5.33334	FALSE	FALSE	Stable	Stable
CADM3	17.4206	17.7163	17.8326	16.0568	15.9206	16.3562	Q8N126	Q8N126	CADM3_HUMAN	CADM3	Cell adhesion molecule 3	Q8N126	TRUE	3	-1.91812	-1.17249	-1.54531	0.000482814	6.52872e-05	-10.2468	TRUE	TRUE	Down	Down
CADM4	19.6562	19.6158	19.8762	19.1494	18.95	19.1411	Q8NFZ8	Q8NFZ8	CADM4_HUMAN	CADM4	Cell adhesion molecule 4	Q8NFZ8	FALSE	0	-0.861017	-0.410814	-0.635916	0.0020375	0.00051284	-6.9837	TRUE	TRUE	Down	Down
CALCA	17.0588	16.3092	17.1694	17.2473	16.9322	17.4115	P01258	P01258	CALC_HUMAN	CALCA	Calcitonin	P01258	TRUE	1	-0.280347	0.982671	0.351162	0.283696	0.220337	1.37465	FALSE	FALSE	Stable	Stable
CALCOCO1	19.551	19.5304	19.6177	20.2173	20.0217	20.0787	Q9P1Z2	Q9P1Z2	CACO1_HUMAN	CALCOCO1	Calcium-binding and coiled-coil domain-containing protein 1	Q9P1Z2	FALSE	0	0.390703	0.688302	0.539502	0.000786099	0.000135604	8.96305	TRUE	TRUE	Up	Up
CALCOCO2	19.4869	19.4527	19.664	19.8799	20.0134	19.9729	Q13137	Q13137	CACO2_HUMAN	CALCOCO2	Calcium-binding and coiled-coil domain-containing protein 2	Q13137	FALSE	0	0.248524	0.593279	0.420901	0.00361975	0.00108687	6.03621	FALSE	FALSE	Stable	Stable
CALD1	24.87	24.9259	24.9757	24.8815	24.9302	24.8723	Q05682	Q05682	CALD1_HUMAN	CALD1	Caldesmon	Q05682	FALSE	0	-0.13017	0.0718439	-0.029163	0.570832	0.503273	-0.713748	FALSE	FALSE	Stable	Stable
CALM1	25.0591	25.2896	25.2598	25.2767	25.3825	25.3514	P0DP23;P0DP24;P0DP25	P0DP23;P0DP24;P0DP25	CALM1_HUMAN;CALM2_HUMAN;CALM3_HUMAN	CALM1;CALM2;CALM3	Calmodulin-1	P0DP23	FALSE	0	-0.0429414	0.310887	0.133973	0.161147	0.112419	1.87205	FALSE	FALSE	Stable	Stable
CALR	25.7717	25.8355	25.7963	25.913	25.9244	25.9318	P27797	P27797	CALR_HUMAN	CALR	Calreticulin	P27797	FALSE	0	0.0414528	0.202289	0.121871	0.0216477	0.0103011	3.74637	FALSE	FALSE	Stable	Stable
CALU	25.1147	25.1229	25.2635	25.2906	25.4044	25.3246	O43852	O43852	CALU_HUMAN	CALU	Calumenin	O43852	FALSE	0	0.0327704	0.312882	0.172826	0.0429132	0.0237031	3.05051	FALSE	FALSE	Stable	Stable
CAMK1	22.5154	22.4463	22.4773	22.1621	22.0657	22.247	Q14012	Q14012	KCC1A_HUMAN	CAMK1	Calcium/calmodulin-dependent protein kinase type 1	Q14012	FALSE	0	-0.456388	-0.186436	-0.321412	0.00400533	0.00123384	-5.88667	FALSE	FALSE	Stable	Stable
CAMK1D	18.192	17.685	18.051	16.2547	16.2126	15.9441	Q8IU85	Q8IU85	KCC1D_HUMAN	CAMK1D	Calcium/calmodulin-dependent protein kinase type 1D	Q8IU85	TRUE	3	-2.2157	-1.46211	-1.8389	0.000260928	2.64456e-05	-12.0647	TRUE	TRUE	Down	Down
CAMK2D	22.3174	22.2847	22.2372	22.0908	22.1233	22.0974	Q13557	Q13554;Q13555;Q13557	KCC2D_HUMAN	CAMK2D	Calcium/calmodulin-dependent protein kinase type II subunit delta	Q13557	FALSE	0	-0.263068	-0.0887955	-0.175932	0.00762011	0.00278308	-4.99126	FALSE	FALSE	Stable	Stable
CAMK2G	21.7014	21.7327	21.7925	22.1139	22.1288	22.1478	Q13555	Q13554;Q13555	KCC2G_HUMAN	CAMK2G	Calcium/calmodulin-dependent protein kinase type II subunit gamma	Q13555	FALSE	0	0.296761	0.479109	0.387935	0.000435065	5.65332e-05	10.5184	FALSE	FALSE	Stable	Stable
CAMK4	18.3549	18.3864	18.3715	16.1319	16.3322	17.0321	Q16566	Q16566	KCC4_HUMAN	CAMK4	Calcium/calmodulin-dependent protein kinase type IV	Q16566	TRUE	2	-2.43905	-1.30535	-1.8722	0.00110464	0.0002242	-8.16486	TRUE	TRUE	Down	Down
CAMKK1	16.9715	16.5253	17.2284	17.0359	16.5654	16.3639	Q8N5S9	Q8N5S9	KKCC1_HUMAN	CAMKK1	Calcium/calmodulin-dependent protein kinase kinase 1	Q8N5S9	FALSE	0	-0.846823	0.340275	-0.253274	0.403768	0.333726	-1.05487	FALSE	FALSE	Stable	Stable
CAMKK2	19.5637	19.3332	19.4304	19.1663	19.2574	19.5502	Q96RR4	Q96RR4	KKCC2_HUMAN	CAMKK2	Calcium/calmodulin-dependent protein kinase kinase 2	Q96RR4	FALSE	0	-0.402011	0.166379	-0.117816	0.416697	0.346559	-1.02483	FALSE	FALSE	Stable	Stable
CAMKMT	17.7371	17.8762	17.669	17.668	17.2997	17.4763	Q7Z624	Q7Z624	CMKMT_HUMAN	CAMKMT	Calmodulin-lysine N-methyltransferase	Q7Z624	FALSE	0	-0.541534	-0.017391	-0.279462	0.067706	0.0402835	-2.63614	FALSE	FALSE	Stable	Stable
CAMLG	20.1576	20.3233	20.3647	19.7978	19.914	19.8001	P49069	P49069	CAMLG_HUMAN	CAMLG	Guided entry of tail-anchored proteins factor CAMLG	P49069	FALSE	0	-0.612237	-0.276901	-0.444569	0.00263348	0.000712888	-6.5547	FALSE	FALSE	Stable	Stable
CAMSAP1	20.2007	20.0876	20.0925	19.7683	19.8829	19.6651	Q5T5Y3	Q5T5Y3	CAMP1_HUMAN	CAMSAP1	Calmodulin-regulated spectrin-associated protein 1	Q5T5Y3	FALSE	0	-0.520549	-0.189175	-0.354862	0.0060822	0.0020898	-5.29462	FALSE	FALSE	Stable	Stable
CAMSAP2	20.3355	20.2894	20.305	19.9591	20.1884	20.1247	Q08AD1	Q08AD1	CAMP2_HUMAN	CAMSAP2	Calmodulin-regulated spectrin-associated protein 2	Q08AD1	FALSE	0	-0.378864	-0.0595599	-0.219212	0.0303523	0.0155572	-3.39433	FALSE	FALSE	Stable	Stable
CAMSAP3	21.7269	21.7865	21.8602	21.6292	21.6938	21.4714	Q9P1Y5	Q9P1Y5	CAMP3_HUMAN	CAMSAP3	Calmodulin-regulated spectrin-associated protein 3	Q9P1Y5	FALSE	0	-0.365475	-0.020659	-0.193067	0.0584805	0.033928	-2.76831	FALSE	FALSE	Stable	Stable
CAND1	24.7197	24.6937	24.711	24.8033	24.7474	24.7756	Q86VP6	Q86VP6	CAND1_HUMAN	CAND1	Cullin-associated NEDD8-dissociated protein 1	Q86VP6	FALSE	0	-0.011561	0.14627	0.0673544	0.122239	0.0813244	2.10993	FALSE	FALSE	Stable	Stable
CAND2	19.3588	19.364	19.387	20.9074	20.9323	20.8766	O75155	O75155	CAND2_HUMAN	CAND2	Cullin-associated NEDD8-dissociated protein 2	O75155	FALSE	0	1.45619	1.61486	1.53552	3.36304e-06	1.03945e-08	47.8476	TRUE	TRUE	Up	Up
CANT1	19.9824	20.0575	20.0486	20.8162	20.6784	20.7267	Q8WVQ1	Q8WVQ1	CANT1_HUMAN	CANT1	Soluble calcium-activated nucleotidase 1	Q8WVQ1	FALSE	0	0.591842	0.829931	0.710887	0.000125879	8.54324e-06	14.7623	TRUE	TRUE	Up	Up
CANX	26.5592	26.6353	26.6027	26.8545	26.7642	26.8291	P27824	P27824	CALX_HUMAN	CANX	Calnexin	P27824	FALSE	0	0.116833	0.316941	0.216887	0.00579619	0.00196988	5.35877	FALSE	FALSE	Stable	Stable
CAP1	26.1184	26.1226	26.1519	26.1594	26.1381	26.1878	Q01518	Q01518	CAP1_HUMAN	CAP1	Adenylyl cyclase-associated protein 1	Q01518	FALSE	0	-0.0480965	0.109699	0.0308014	0.443684	0.373264	0.965093	FALSE	FALSE	Stable	Stable
CAP2	24.4059	24.4425	24.4292	24.5876	24.5585	24.5862	P40123	P40123	CAP2_HUMAN	CAP2	Adenylyl cyclase-associated protein 2	P40123	FALSE	0	0.0758414	0.227361	0.151601	0.00789049	0.0029052	4.94684	FALSE	FALSE	Stable	Stable
CAPG	24.4151	24.4238	24.3998	24.1801	24.1924	24.1443	P40121	P40121	CAPG_HUMAN	CAPG	Macrophage-capping protein	P40121	FALSE	0	-0.317888	-0.163398	-0.240643	0.00139145	0.000306243	-7.70136	FALSE	FALSE	Stable	Stable
CAPN1	24.0751	24.0907	24.0459	24.0478	24.075	24.0762	P07384	P07384	CAN1_HUMAN	CAPN1	Calpain-1 catalytic subunit	P07384	FALSE	0	-0.0815457	0.0730356	-0.00425507	0.915719	0.896379	-0.136095	FALSE	FALSE	Stable	Stable
CAPN15	18.4098	18.5179	18.4162	18.6987	18.6213	18.7301	O75808	O75808	CAN15_HUMAN	CAPN15	Calpain-15	O75808	FALSE	0	0.114955	0.35586	0.235407	0.00861633	0.00325235	4.83135	FALSE	FALSE	Stable	Stable
CAPN2	24.3367	24.3984	24.4074	24.7315	24.7289	24.7694	P17655	P17655	CAN2_HUMAN	CAPN2	Calpain-2 catalytic subunit	P17655	FALSE	0	0.274681	0.450145	0.362413	0.000487672	6.65212e-05	10.212	FALSE	FALSE	Stable	Stable
CAPN5	20.7874	20.7933	20.8314	21.2385	21.3286	21.2371	O15484	O15484	CAN5_HUMAN	CAPN5	Calpain-5	O15484	FALSE	0	0.366169	0.56185	0.464009	0.000289618	3.10144e-05	11.7239	FALSE	FALSE	Stable	Stable
CAPN7	20.0017	19.9256	19.7863	19.9565	19.9653	20.0716	Q9Y6W3	Q9Y6W3	CAN7_HUMAN	CAPN7	Calpain-7	Q9Y6W3	FALSE	0	-0.0727697	0.259273	0.0932515	0.279563	0.216306	1.38853	FALSE	FALSE	Stable	Stable
CAPNS1	25.429	25.2986	25.2652	25.4009	25.4409	25.3983	P04632	P04632;Q96L46	CPNS1_HUMAN	CAPNS1	Calpain small subunit 1	P04632	FALSE	0	-0.0452072	0.210052	0.0824223	0.221507	0.16357	1.59646	FALSE	FALSE	Stable	Stable
CAPRIN1	24.6747	24.6333	24.6094	24.756	24.8364	24.7778	Q14444	Q14444	CAPR1_HUMAN	CAPRIN1	Caprin-1	Q14444	FALSE	0	0.056739	0.245084	0.150911	0.0178405	0.00808277	3.96153	FALSE	FALSE	Stable	Stable
CAPZA1	26.2634	26.2511	26.42	26.4558	26.2978	26.3587	P52907	P52907	CAZA1_HUMAN	CAPZA1	F-actin-capping protein subunit alpha-1	P52907	FALSE	0	-0.103263	0.221779	0.0592582	0.474817	0.403518	0.90137	FALSE	FALSE	Stable	Stable
CAPZA2	19.0961	19.3152	19.5408	19.3581	19.2314	19.3354	P47755	P47755	CAZA2_HUMAN	CAPZA2	F-actin-capping protein subunit alpha-2	P47755	FALSE	0	-0.294223	0.27611	-0.00905678	0.951086	0.940077	-0.0785125	FALSE	FALSE	Stable	Stable
CAPZB	24.9689	25.0734	25.0712	25.0305	25.0974	25.0521	P47756	P47756	CAPZB_HUMAN	CAPZB	F-actin-capping protein subunit beta	P47756	FALSE	0	-0.0853724	0.129717	0.0221723	0.686513	0.629223	0.509667	FALSE	FALSE	Stable	Stable
CARD10	18.2636	16.9215	17.7182	16.875	16.3242	16.0886	Q9BWT7	Q9BWT7	CAR10_HUMAN	CARD10	Caspase recruitment domain-containing protein 10	Q9BWT7	TRUE	1	-2.14329	-0.267003	-1.20514	0.0377959	0.0202925	-3.17567	FALSE	FALSE	Stable	Stable
CARD16	20.7958	20.767	20.7518	20.4416	20.3928	20.388	Q5EG05	Q5EG05	CAR16_HUMAN	CARD16	Caspase recruitment domain-containing protein 16	Q5EG05	FALSE	0	-0.446671	-0.281429	-0.36405	0.000381023	4.66158e-05	-10.8927	FALSE	FALSE	Stable	Stable
CARD19	20.4127	20.3409	20.3738	20.8045	20.6245	20.9111	Q96LW7	Q96LW7	CAR19_HUMAN	CARD19	Caspase recruitment domain-containing protein 19	Q96LW7	FALSE	0	0.213444	0.594991	0.404218	0.00634902	0.00220274	5.23795	FALSE	FALSE	Stable	Stable
CARD6	16.8052	16.9214	16.7038	17.5387	17.3127	17.2954	Q9BX69	Q9BX69	CARD6_HUMAN	CARD6	Caspase recruitment domain-containing protein 6	Q9BX69	FALSE	0	0.353659	0.790673	0.572166	0.00276637	0.00076039	6.47321	TRUE	TRUE	Up	Up
CARHSP1	21.9945	22.3735	21.866	22.5661	22.7257	22.4959	Q9Y2V2	Q9Y2V2	CHSP1_HUMAN	CARHSP1	Calcium-regulated heat-stable protein 1	Q9Y2V2	FALSE	0	0.167196	0.86859	0.517893	0.0237135	0.011501	3.65066	FALSE	FALSE	Stable	Stable
CARM1	22.9828	23.0216	23.0434	23.0241	22.9503	23.0621	Q86X55	Q86X55	CARM1_HUMAN	CARM1	Histone-arginine methyltransferase CARM1	Q86X55	FALSE	0	-0.107596	0.100098	-0.003749	0.945121	0.93191	-0.0892451	FALSE	FALSE	Stable	Stable
CARMIL1	20.0184	20.1078	20.0884	19.8287	19.6038	19.6891	Q5VZK9	Q5VZK9	CARL1_HUMAN	CARMIL1	F-actin-uncapping protein LRRC16A	Q5VZK9	FALSE	0	-0.526386	-0.202375	-0.364381	0.00501246	0.00164156	-5.56019	FALSE	FALSE	Stable	Stable
CARNMT1	20.2172	20.0186	19.8921	20.4999	20.3327	20.2789	Q8N4J0	Q8N4J0	CARME_HUMAN	CARNMT1	Carnosine N-methyltransferase	Q8N4J0	FALSE	0	0.079497	0.576211	0.327854	0.0346255	0.0182246	3.26338	FALSE	FALSE	Stable	Stable
CARS1	23.1512	23.1064	23.1051	23.551	23.5793	23.5822	P49589	P49589	SYCC_HUMAN	CARS1	Cysteine--tRNA ligase, cytoplasmic	P49589	FALSE	0	0.370718	0.529079	0.449899	0.000152847	1.12987e-05	14.0463	FALSE	FALSE	Stable	Stable
CARS2	21.7948	21.6101	21.7599	21.4126	21.3951	21.3649	Q9HA77	Q9HA77	SYCM_HUMAN	CARS2	Probable cysteine--tRNA ligase, mitochondrial	Q9HA77	FALSE	0	-0.469756	-0.191744	-0.33075	0.00401613	0.00123872	-5.88206	FALSE	FALSE	Stable	Stable
CASC3	18.3413	18.3919	18.3542	18.232	18.5005	18.4928	O15234	O15234	CASC3_HUMAN	CASC3	Protein CASC3	O15234	FALSE	0	-0.151285	0.243256	0.0459857	0.646884	0.586236	0.576269	FALSE	FALSE	Stable	Stable
CASK	20.8136	20.7058	20.7297	19.6242	19.5174	19.4719	O14936	O14936	CSKP_HUMAN	CASK	Peripheral plasma membrane protein CASK	O14936	FALSE	0	-1.34626	-1.07747	-1.21186	3.25599e-05	8.2598e-07	-22.2913	TRUE	TRUE	Down	Down
CASKIN2	20.6707	20.6582	20.6198	20.0608	20.1324	20.2245	Q8WXE0	Q8WXE0	CSKI2_HUMAN	CASKIN2	Caskin-2	Q8WXE0	FALSE	0	-0.634481	-0.386214	-0.510347	0.000493703	6.82856e-05	-10.1634	TRUE	TRUE	Down	Down
CASP1	21.6075	21.5485	21.5236	21.6893	21.682	21.6948	P29466	P29466	CASP1_HUMAN	CASP1	Caspase-1	P29466	FALSE	0	0.0418661	0.215825	0.128845	0.0234568	0.0113511	3.66199	FALSE	FALSE	Stable	Stable
CASP10	19.7356	19.8041	19.8614	19.1305	19.2898	19.5008	Q92851	Q92851	CASPA_HUMAN	CASP10	Caspase-10	Q92851	FALSE	0	-0.736884	-0.249777	-0.49333	0.00751888	0.0027403	-5.00735	FALSE	FALSE	Stable	Stable
CASP2	20.2658	20.2558	20.3479	20.3757	20.4194	20.2932	P42575	P42575	CASP2_HUMAN	CASP2	Caspase-2	P42575	FALSE	0	-0.0466483	0.192504	0.0729279	0.245268	0.184401	1.50769	FALSE	FALSE	Stable	Stable
CASP3	21.4998	21.5951	21.5783	20.9958	21.1825	21.2969	P42574	P42574	CASP3_HUMAN	CASP3	Caspase-3	P42574	FALSE	0	-0.602351	-0.196308	-0.399329	0.00843475	0.00315448	-4.86243	FALSE	FALSE	Stable	Stable
CASP4	21.1385	21.2456	21.0314	21.8259	21.7758	21.8222	P49662	P49662	CASP4_HUMAN	CASP4	Caspase-4	P49662	FALSE	0	0.520426	0.818481	0.669453	0.000357691	4.18969e-05	11.105	TRUE	TRUE	Up	Up
CASP6	23.5742	23.5482	23.4659	23.1638	23.2074	23.1481	P55212	P55212	CASP6_HUMAN	CASP6	Caspase-6	P55212	FALSE	0	-0.459988	-0.252722	-0.356355	0.000944109	0.000180554	-8.50061	FALSE	FALSE	Stable	Stable
CASP7	22.7027	22.5401	22.6601	22.6386	22.773	22.7588	P55210	P55210	CASP7_HUMAN	CASP7	Caspase-7	P55210	FALSE	0	-0.0614084	0.239676	0.0891339	0.257825	0.195635	1.46369	FALSE	FALSE	Stable	Stable
CASP8	22.7007	22.6332	22.6789	22.2389	22.1341	22.1265	Q14790	Q14790	CASP8_HUMAN	CASP8	Caspase-8	Q14790	FALSE	0	-0.614635	-0.39423	-0.504432	0.000334309	3.77578e-05	-11.3155	TRUE	TRUE	Down	Down
CASP9	18.5889	18.6122	18.603	19.0141	18.6585	18.9229	P55211	P55211	CASP9_HUMAN	CASP9	Caspase-9	P55211	FALSE	0	0.0328481	0.494758	0.263803	0.0550195	0.0315946	2.82369	FALSE	FALSE	Stable	Stable
CAST	22.8831	22.9466	22.8763	23.0776	23.2507	23.1931	P20810	P20810	ICAL_HUMAN	CAST	Calpastatin	P20810	FALSE	0	0.137663	0.405968	0.271815	0.00751328	0.00273632	5.00886	FALSE	FALSE	Stable	Stable
CASTOR2	20.7898	21.0671	20.8808	19.5895	19.7158	19.4066	A6NHX0	A6NHX0	CAST2_HUMAN	CASTOR2	Cytosolic arginine sensor for mTORC1 subunit 2	A6NHX0	FALSE	0	-1.60147	-1.08239	-1.34193	0.000211213	1.91656e-05	-12.7818	TRUE	TRUE	Down	Down
CAT	22.2017	22.1546	22.1895	22.4825	22.4323	22.4553	P04040	P04040	CATA_HUMAN	CAT	Catalase	P04040	FALSE	0	0.193481	0.356108	0.274794	0.00101302	0.000198238	8.35427	FALSE	FALSE	Stable	Stable
CAV1	24.3927	24.3998	24.4277	24.6102	24.7763	24.7584	Q03135	Q03135	CAV1_HUMAN	CAV1	Caveolin-1	Q03135	FALSE	0	0.177326	0.439062	0.308194	0.00418096	0.00130463	5.82178	FALSE	FALSE	Stable	Stable
CAV2	19.3073	19.1298	19.0953	20.0573	19.1239	19.2872	P51636	P51636	CAV2_HUMAN	CAV2	Caveolin-2	P51636	FALSE	0	-0.300267	0.924262	0.311997	0.322656	0.256421	1.25973	FALSE	FALSE	Stable	Stable
CAVIN1	26.0832	26.0239	26.0314	26.1271	26.1008	26.1195	Q6NZI2	Q6NZI2	CAVN1_HUMAN	CAVIN1	Caveolae-associated protein 1	Q6NZI2	FALSE	0	-0.0116954	0.150931	0.0696178	0.121385	0.0806005	2.11652	FALSE	FALSE	Stable	Stable
CAVIN2	21.3612	21.3656	21.3221	22.6723	22.7445	22.692	O95810	O95810	CAVN2_HUMAN	CAVIN2	Caveolae-associated protein 2	O95810	FALSE	0	1.26577	1.44081	1.35329	5.74367e-06	3.7724e-08	38.2263	TRUE	TRUE	Up	Up
CAVIN3	24.0934	24.0162	24.0869	23.9013	23.7765	23.7675	Q969G5	Q969G5	CAVN3_HUMAN	CAVIN3	Caveolae-associated protein 3	Q969G5	FALSE	0	-0.374432	-0.126338	-0.250385	0.00762785	0.00278689	-4.98984	FALSE	FALSE	Stable	Stable
CBFA2T2	19.1034	19.238	19.0138	19.2579	19.0829	19.3788	O43439	O43439	MTG8R_HUMAN	CBFA2T2	Protein CBFA2T2	O43439	FALSE	0	-0.111385	0.354281	0.121448	0.312026	0.246607	1.28947	FALSE	FALSE	Stable	Stable
CBFB	22.974	23.0507	23.0239	23.3572	23.4522	23.4296	Q13951	Q13951	PEBB_HUMAN	CBFB	Core-binding factor subunit beta	Q13951	FALSE	0	0.294296	0.499294	0.396795	0.000617414	9.49378e-05	9.56996	FALSE	FALSE	Stable	Stable
CBL	21.93	21.9402	21.9329	22.2391	22.2865	22.2211	P22681	P22681	CBL_HUMAN	CBL	E3 ubiquitin-protein ligase CBL	P22681	FALSE	0	0.233663	0.395295	0.314479	0.00060658	9.22933e-05	9.61959	FALSE	FALSE	Stable	Stable
CBLB	16.9166	17.2733	17.0568	15.1751	15.6894	16.2257	Q13191	Q13191	CBLB_HUMAN	CBLB	E3 ubiquitin-protein ligase CBL-B	Q13191	FALSE	0	-2.0497	-0.721381	-1.38554	0.00672375	0.00237604	-5.15716	TRUE	TRUE	Down	Down
CBLL1	20.6006	20.6716	20.8091	20.3298	20.621	20.6069	Q75N03	Q75N03	HAKAI_HUMAN	CBLL1	E3 ubiquitin-protein ligase Hakai	Q75N03	FALSE	0	-0.417328	0.0682327	-0.174548	0.179814	0.127919	-1.77731	FALSE	FALSE	Stable	Stable
CBR1	25.4775	25.5272	25.5043	25.5852	25.5297	25.5217	P16152	P16152	CBR1_HUMAN	CBR1	Carbonyl reductase [NADPH] 1	P16152	FALSE	0	-0.0437704	0.128762	0.0424957	0.338397	0.270848	1.21778	FALSE	FALSE	Stable	Stable
CBR3	23.5442	23.549	23.4263	23.6779	23.685	23.6199	O75828	O75828	CBR3_HUMAN	CBR3	Carbonyl reductase [NADPH] 3	O75828	FALSE	0	0.0381883	0.270671	0.154429	0.033849	0.017768	3.28423	FALSE	FALSE	Stable	Stable
CBR4	18.8457	18.6086	18.4825	18.3319	18.2366	18.237	Q8N4T8	Q8N4T8	CBR4_HUMAN	CBR4	3-oxoacyl-[acyl-carrier-protein] reductase	Q8N4T8	FALSE	0	-0.616402	-0.137799	-0.377101	0.0189274	0.00869952	-3.89562	FALSE	FALSE	Stable	Stable
CBS	20.5767	20.7143	20.6816	21.2872	21.2504	21.2384	P35520	P35520	CBS_HUMAN	CBS	Cystathionine beta-synthase	P35520	FALSE	0	0.486681	0.715563	0.601122	0.00020001	1.75471e-05	12.9851	TRUE	TRUE	Up	Up
CBX1	18.5443	18.3594	18.8091	18.5313	18.2988	18.5793	P83916	P83916	CBX1_HUMAN	CBX1	Chromobox protein homolog 1	P83916	FALSE	0	-0.431346	0.22905	-0.101148	0.547223	0.478723	-0.757265	FALSE	FALSE	Stable	Stable
CBX2	14.3598	14.0739	14.0743	16.14	16.1582	16.4723	Q14781	Q14781	CBX2_HUMAN	CBX2	Chromobox protein homolog 2	Q14781	TRUE	3	1.78287	2.39207	2.08747	7.98276e-05	3.92713e-06	16.9417	TRUE	TRUE	Up	Up
CBX3	21.3768	21.2128	21.3001	21.5435	21.2636	21.4977	Q13185	Q13185	CBX3_HUMAN	CBX3	Chromobox protein homolog 3	Q13185	FALSE	0	-0.0768221	0.353605	0.138391	0.223245	0.165083	1.58966	FALSE	FALSE	Stable	Stable
CBX4	18.6667	18.1459	18.6152	18.9121	18.9329	19.0132	O00257	O00257	CBX4_HUMAN	CBX4	E3 SUMO-protein ligase CBX4	O00257	FALSE	0	0.122614	0.831007	0.47681	0.0324238	0.0168529	3.32786	FALSE	FALSE	Stable	Stable
CBX5	23.7304	23.8472	23.8632	23.5832	23.4543	23.5494	P45973	P45973	CBX5_HUMAN	CBX5	Chromobox protein homolog 5	P45973	FALSE	0	-0.42109	-0.148127	-0.284608	0.00672943	0.00238065	-5.1551	FALSE	FALSE	Stable	Stable
CBX6	19.71	19.9014	19.6831	19.0415	18.9865	19.0168	O95503	O95503;Q9HC52	CBX6_HUMAN	CBX6	Chromobox protein homolog 6	O95503	FALSE	0	-0.91111	-0.58866	-0.749885	0.000312688	3.45507e-05	-11.4981	TRUE	TRUE	Down	Down
CBX8	19.9773	20.069	20.0087	20.247	20.2918	20.3686	Q9HC52	Q9HC52	CBX8_HUMAN	CBX8	Chromobox protein homolog 8	Q9HC52	FALSE	0	0.168771	0.399424	0.284098	0.00349924	0.00103918	6.08981	FALSE	FALSE	Stable	Stable
CC2D1A	22.0584	22.0728	22.1182	21.4001	21.4186	21.4233	Q6P1N0	Q6P1N0	C2D1A_HUMAN	CC2D1A	Coiled-coil and C2 domain-containing protein 1A	Q6P1N0	FALSE	0	-0.749546	-0.58871	-0.669128	4.34595e-05	1.30563e-06	-20.5694	TRUE	TRUE	Down	Down
CC2D1B	20.9401	20.9427	20.86	20.6339	20.6325	20.5745	Q5T0F9	Q5T0F9	C2D1B_HUMAN	CC2D1B	Coiled-coil and C2 domain-containing protein 1B	Q5T0F9	FALSE	0	-0.39875	-0.202512	-0.300631	0.00149357	0.000334491	-7.57436	FALSE	FALSE	Stable	Stable
CCAR1	23.0225	23.0159	22.9381	22.7839	22.824	22.7628	Q8IX12	Q8IX12	CCAR1_HUMAN	CCAR1	Cell division cycle and apoptosis regulator protein 1	Q8IX12	FALSE	0	-0.298697	-0.105155	-0.201926	0.00672062	0.00237337	-5.15835	FALSE	FALSE	Stable	Stable
CCAR2	23.7107	23.6753	23.698	23.6181	23.6277	23.5799	Q8N163	Q8N163	CCAR2_HUMAN	CCAR2	Cell cycle and apoptosis regulator protein 2	Q8N163	FALSE	0	-0.165016	-0.00711528	-0.0860655	0.0636088	0.0373133	-2.69488	FALSE	FALSE	Stable	Stable
CCBE1	19.8851	19.7368	20.0906	18.6104	18.3003	18.4195	Q6UXH8	Q6UXH8	CCBE1_HUMAN	CCBE1	Collagen and calcium-binding EGF domain-containing protein 1	Q6UXH8	FALSE	0	-1.75094	-1.17059	-1.46076	0.000232515	2.22484e-05	-12.4448	TRUE	TRUE	Down	Down
CCDC102A	18.9607	19.6607	19.1863	18.9312	15.9822	19.3429	Q96A19	Q96A19	C102A_HUMAN	CCDC102A	Coiled-coil domain-containing protein 102A	Q96A19	TRUE	1	-3.40662	1.03898	-1.18382	0.302802	0.237952	-1.31659	FALSE	FALSE	Stable	Stable
CCDC106	20.4182	20.5517	20.4375	20.0433	20.0644	20.1594	Q9BWC9	Q9BWC9	CC106_HUMAN	CCDC106	Coiled-coil domain-containing protein 106	Q9BWC9	FALSE	0	-0.512983	-0.247199	-0.380091	0.00194831	0.000480729	-7.07054	FALSE	FALSE	Stable	Stable
CCDC115	19.2335	19.464	19.6876	19.7426	20.4153	20.3579	Q96NT0	Q96NT0	CC115_HUMAN	CCDC115	Coiled-coil domain-containing protein 115	Q96NT0	FALSE	0	0.186116	1.23432	0.71022	0.0317053	0.0164094	3.34996	FALSE	FALSE	Stable	Stable
CCDC117	20.2593	20.4452	20.5722	20.2569	20.4429	20.347	Q8IWD4	Q8IWD4	CC117_HUMAN	CCDC117	Coiled-coil domain-containing protein 117	Q8IWD4	FALSE	0	-0.305026	0.151816	-0.076605	0.510947	0.440079	-0.829059	FALSE	FALSE	Stable	Stable
CCDC12	19.9772	19.9821	20.1853	19.4107	19.877	20.0084	Q8WUD4	Q8WUD4	CCD12_HUMAN	CCDC12	Coiled-coil domain-containing protein 12	Q8WUD4	FALSE	0	-0.68833	0.122712	-0.282809	0.191617	0.13755	-1.72403	FALSE	FALSE	Stable	Stable
CCDC124	22.4867	22.5804	22.6308	22.0092	22.3011	22.2744	Q96CT7	Q96CT7	CC124_HUMAN	CCDC124	Coiled-coil domain-containing protein 124	Q96CT7	FALSE	0	-0.59312	-0.149045	-0.371082	0.0154125	0.00670685	-4.13151	FALSE	FALSE	Stable	Stable
CCDC127	21.2938	21.2035	21.231	21.0934	21.1551	21.0391	Q96BQ5	Q96BQ5	CC127_HUMAN	CCDC127	Coiled-coil domain-containing protein 127	Q96BQ5	FALSE	0	-0.259455	-0.0342456	-0.14685	0.0360627	0.0191251	-3.2239	FALSE	FALSE	Stable	Stable
CCDC134	21.2757	20.9679	21.3195	20.9381	20.9265	21.0264	Q9H6E4	Q9H6E4	CC134_HUMAN	CCDC134	Coiled-coil domain-containing protein 134	Q9H6E4	FALSE	0	-0.471133	0.0230621	-0.224035	0.105475	0.06808	-2.24136	FALSE	FALSE	Stable	Stable
CCDC137	20.1319	20.3717	20.285	20.6151	21.1031	21.0002	Q6PK04	Q6PK04	CC137_HUMAN	CCDC137	Coiled-coil domain-containing protein 137	Q6PK04	FALSE	0	0.297695	0.988751	0.643223	0.0103829	0.00409164	4.60196	FALSE	FALSE	Up	Stable
CCDC14	18.5446	18.6504	18.6737	18.7926	18.6872	18.765	Q49A88	Q49A88	CCD14_HUMAN	CCDC14	Coiled-coil domain-containing protein 14	Q49A88	FALSE	0	-0.000321477	0.2511	0.125389	0.0818224	0.0504212	2.46577	FALSE	FALSE	Stable	Stable
CCDC15	17.2616	17.3565	17.3989	17.4603	17.5305	17.6656	Q0P6D6	Q0P6D6	CCD15_HUMAN	CCDC15	Coiled-coil domain-containing protein 15	Q0P6D6	FALSE	0	0.0479872	0.378276	0.213132	0.0372676	0.0199273	3.19042	FALSE	FALSE	Stable	Stable
CCDC174	19.1091	19.6199	19.6048	19.2402	19.4401	19.5121	Q6PII3	Q6PII3	CC174_HUMAN	CCDC174	Coiled-coil domain-containing protein 174	Q6PII3	FALSE	0	-0.437637	0.34337	-0.0471335	0.81548	0.775887	-0.298379	FALSE	FALSE	Stable	Stable
CCDC18	20.8834	20.8359	20.9415	20.9925	20.9215	21.006	Q5T9S5	Q5T9S5	CCD18_HUMAN	CCDC18	Coiled-coil domain-containing protein 18	Q5T9S5	FALSE	0	-0.0219957	0.194763	0.0863836	0.143692	0.0983177	1.97038	FALSE	FALSE	Stable	Stable
CCDC186	19.6256	19.6544	19.6908	19.143	19.2226	19.0675	Q7Z3E2	Q7Z3E2	CC186_HUMAN	CCDC186	Coiled-coil domain-containing protein 186	Q7Z3E2	FALSE	0	-0.634622	-0.390515	-0.512568	0.000458045	6.0758e-05	-10.3817	TRUE	TRUE	Down	Down
CCDC22	21.4186	21.4364	21.3807	21.1322	21.0689	21.0598	O60826	O60826	CCD22_HUMAN	CCDC22	Coiled-coil domain-containing protein 22	O60826	FALSE	0	-0.415592	-0.234271	-0.324932	0.000817561	0.000144368	-8.86005	FALSE	FALSE	Stable	Stable
CCDC24	20.85	20.7119	20.8597	20.9785	21.1195	21.0161	Q8N4L8	Q8N4L8	CCD24_HUMAN	CCDC24	Coiled-coil domain-containing protein 24	Q8N4L8	FALSE	0	0.0822041	0.379483	0.230844	0.0198658	0.00926901	3.83926	FALSE	FALSE	Stable	Stable
CCDC25	20.3058	20.2714	20.3783	20.2778	20.2611	20.1331	Q86WR0	Q86WR0	CCD25_HUMAN	CCDC25	Coiled-coil domain-containing protein 25	Q86WR0	FALSE	0	-0.228471	0.0395324	-0.0944693	0.187389	0.13408	-1.74279	FALSE	FALSE	Stable	Stable
CCDC28B	17.7581	17.9631	17.8461	18.1254	17.8623	18.2023	Q9BUN5	Q9BUN5	CC28B_HUMAN	CCDC28B	Coiled-coil domain-containing protein 28B	Q9BUN5	FALSE	0	-0.0470775	0.462179	0.207551	0.136345	0.0925179	2.01503	FALSE	FALSE	Stable	Stable
CCDC43	21.7598	21.7644	21.7583	21.7378	21.9697	21.906	Q96MW1	Q96MW1	CCD43_HUMAN	CCDC43	Coiled-coil domain-containing protein 43	Q96MW1	FALSE	0	-0.0483981	0.269127	0.110364	0.192792	0.138592	1.71848	FALSE	FALSE	Stable	Stable
CCDC47	21.8578	21.8963	21.9078	22.2411	22.2515	22.2558	Q96A33	Q96A33	CCD47_HUMAN	CCDC47	PAT complex subunit CCDC47	Q96A33	FALSE	0	0.285193	0.439153	0.362173	0.000299357	3.24223e-05	11.6306	FALSE	FALSE	Stable	Stable
CCDC50	22.9059	22.8333	22.9929	23.4889	23.6199	23.5654	Q8IVM0	Q8IVM0	CCD50_HUMAN	CCDC50	Coiled-coil domain-containing protein 50	Q8IVM0	FALSE	0	0.505804	0.78895	0.647377	0.000335778	3.79669e-05	11.3042	TRUE	TRUE	Up	Up
CCDC51	19.6794	19.4558	19.5444	19.6002	19.6274	19.4397	Q96ER9	Q96ER9	MITOK_HUMAN	CCDC51	Mitochondrial potassium channel	Q96ER9	FALSE	0	-0.197391	0.189202	-0.00409434	0.966857	0.960009	-0.0523629	FALSE	FALSE	Stable	Stable
CCDC59	21.7488	21.8906	21.6183	16.0452	21.8575	22.069	Q9P031	Q9P031	TAP26_HUMAN	CCDC59	Thyroid transcription factor 1-associated protein 26	Q9P031	TRUE	1	-5.8325	2.30846	-1.76202	0.397184	0.327364	-1.07011	FALSE	FALSE	Stable	Stable
CCDC6	22.1124	22.3294	22.2744	22.2561	22.4134	22.3973	Q16204	Q16204	CCDC6_HUMAN	CCDC6	Coiled-coil domain-containing protein 6	Q16204	FALSE	0	-0.0661081	0.299829	0.11686	0.225653	0.167503	1.5789	FALSE	FALSE	Stable	Stable
CCDC71L	19.692	19.7194	19.6469	19.4775	19.5173	19.5986	Q8N9Z2	Q8N9Z2	CC71L_HUMAN	CCDC71L	Coiled-coil domain-containing protein 71L	Q8N9Z2	FALSE	0	-0.265258	-0.0446405	-0.154949	0.0281673	0.0141725	-3.47251	FALSE	FALSE	Stable	Stable
CCDC77	20.0265	20.0391	20.0344	19.6661	19.8742	19.7998	Q9BR77	Q9BR77	CCD77_HUMAN	CCDC77	Coiled-coil domain-containing protein 77	Q9BR77	FALSE	0	-0.397076	-0.109575	-0.253326	0.0127106	0.00527411	-4.35647	FALSE	FALSE	Stable	Stable
CCDC8	16.1206	16.0441	15.9432	16.9442	16.8217	16.5248	Q9H0W5	Q9H0W5	CCDC8_HUMAN	CCDC8	Coiled-coil domain-containing protein 8	Q9H0W5	TRUE	3	0.441402	1.01379	0.727594	0.00310057	0.000884851	6.28486	TRUE	TRUE	Up	Up
CCDC80	19.0741	19.0905	18.971	17.3837	17.652	16.3315	Q76M96	Q76M96	CCD80_HUMAN	CCDC80	Coiled-coil domain-containing protein 80	Q76M96	FALSE	0	-2.75963	-1.08605	-1.92284	0.00462304	0.00147545	-5.68056	TRUE	TRUE	Down	Down
CCDC82	19.1853	19.1417	19.2476	19.1904	19.1967	19.1566	Q8N4S0	Q8N4S0	CCD82_HUMAN	CCDC82	Coiled-coil domain-containing protein 82	Q8N4S0	FALSE	0	-0.107988	0.0873231	-0.0103323	0.839187	0.802767	-0.261557	FALSE	FALSE	Stable	Stable
CCDC85B	19.4365	19.4107	19.3576	19.024	19.0784	18.8201	Q15834	Q15834	CC85B_HUMAN	CCDC85B	Coiled-coil domain-containing protein 85B	Q15834	FALSE	0	-0.610265	-0.244677	-0.427471	0.00430071	0.00135141	-5.78108	FALSE	FALSE	Stable	Stable
CCDC85C	20.1019	19.9998	20.3099	19.6908	19.7453	19.7117	A6NKD9	A6NKD9	CC85C_HUMAN	CCDC85C	Coiled-coil domain-containing protein 85C	A6NKD9	FALSE	0	-0.624433	-0.218084	-0.421259	0.00686224	0.00244796	-5.12559	FALSE	FALSE	Stable	Stable
CCDC86	21.3976	21.5121	21.2666	21.6332	22.08	21.9639	Q9H6F5	Q9H6F5	CCD86_HUMAN	CCDC86	Coiled-coil domain-containing protein 86	Q9H6F5	FALSE	0	0.180456	0.820084	0.50027	0.0193759	0.00898389	3.86698	FALSE	FALSE	Up	Stable
CCDC88A	21.2517	21.2828	21.2288	20.4838	20.4822	20.4702	Q3V6T2	Q3V6T2	GRDN_HUMAN	CCDC88A	Girdin	Q3V6T2	FALSE	0	-0.853109	-0.698279	-0.775694	2.32728e-05	4.52569e-07	-24.7701	TRUE	TRUE	Down	Down
CCDC9	19.7689	19.7557	19.7243	19.6673	19.8886	19.7312	Q9Y3X0	Q9Y3X0	CCDC9_HUMAN	CCDC9	Coiled-coil domain-containing protein 9	Q9Y3X0	FALSE	0	-0.142058	0.167514	0.0127281	0.874515	0.845909	0.20328	FALSE	FALSE	Stable	Stable
CCDC90B	20.4578	20.5353	20.4269	20.7291	20.6125	20.7	Q9GZT6	Q9GZT6	CC90B_HUMAN	CCDC90B	Coiled-coil domain-containing protein 90B, mitochondrial	Q9GZT6	FALSE	0	0.0867709	0.327626	0.207199	0.0138645	0.00588325	4.25328	FALSE	FALSE	Stable	Stable
CCDC91	18.8041	18.8946	18.7279	19.0857	19.1611	19.1504	Q7Z6B0	Q7Z6B0	CCD91_HUMAN	CCDC91	Coiled-coil domain-containing protein 91	Q7Z6B0	FALSE	0	0.192862	0.454274	0.323568	0.00343091	0.00101359	6.11975	FALSE	FALSE	Stable	Stable
CCDC92	20.0798	19.8548	20.0159	18.5999	19.0151	18.9919	Q53HC0	Q53HC0	CCD92_HUMAN	CCDC92	Coiled-coil domain-containing protein 92	Q53HC0	FALSE	0	-1.43222	-0.796868	-1.11454	0.000882809	0.000162009	-8.67315	TRUE	TRUE	Down	Down
CCDC93	21.5844	21.5989	21.5765	21.2653	21.3244	21.2818	Q567U6	Q567U6	CCD93_HUMAN	CCDC93	Coiled-coil domain-containing protein 93	Q567U6	FALSE	0	-0.375962	-0.216255	-0.296109	0.000723018	0.000120022	-9.16687	FALSE	FALSE	Stable	Stable
CCDC97	18.572	18.3987	18.6019	18.104	18.4475	18.0288	Q96F63	Q96F63	CCD97_HUMAN	CCDC97	Coiled-coil domain-containing protein 97	Q96F63	FALSE	0	-0.634758	-0.0266901	-0.330724	0.0639481	0.0375947	-2.6891	FALSE	FALSE	Stable	Stable
CCDC9B	21.0524	21.1258	21.0894	21.5382	21.5388	21.5185	Q6ZUT6	Q6ZUT6	CCD9B_HUMAN	CCDC9B	Coiled-coil domain-containing protein 9B	Q6ZUT6	FALSE	0	0.359181	0.526153	0.442667	0.000193239	1.66486e-05	13.1077	FALSE	FALSE	Stable	Stable
CCHCR1	19.8585	19.8608	19.7935	19.8576	19.6713	19.6439	Q8TD31	Q8TD31	CCHCR_HUMAN	CCHCR1	Coiled-coil alpha-helical rod protein 1	Q8TD31	FALSE	0	-0.27485	0.0481717	-0.113339	0.189241	0.135552	-1.73477	FALSE	FALSE	Stable	Stable
CCM2	19.3178	19.2922	19.2682	19.381	19.1771	19.1912	Q9BSQ5	Q9BSQ5	CCM2_HUMAN	CCM2	Cerebral cavernous malformations 2 protein	Q9BSQ5	FALSE	0	-0.198174	0.112277	-0.0429483	0.586822	0.520545	-0.683986	FALSE	FALSE	Stable	Stable
CCN1	23.1711	23.31	23.3883	23.328	23.3444	23.445	O00622	O00622	CCN1_HUMAN	CCN1	CCN family member 1	O00622	FALSE	0	-0.0837114	0.249019	0.0826539	0.334705	0.267204	1.22819	FALSE	FALSE	Stable	Stable
CCN2	19.2986	19.4064	19.2287	20.1279	20.0349	20.1883	P29279	P29279	CCN2_HUMAN	CCN2	CCN family member 2	P29279	FALSE	0	0.64874	0.962939	0.805839	0.000216684	2.0036e-05	12.6805	TRUE	TRUE	Up	Up
CCNA2	19.3403	19.5951	19.4011	18.9982	19.0822	19.1968	P20248	P20248	CCNA2_HUMAN	CCNA2	Cyclin-A2	P20248	FALSE	0	-0.562904	-0.14337	-0.353137	0.0149922	0.00649116	-4.1617	FALSE	FALSE	Stable	Stable
CCNB1	21.7878	21.8795	21.8051	22.3407	22.3518	22.0398	P14635	P14635	CCNB1_HUMAN	CCNB1	G2/mitotic-specific cyclin-B1	P14635	FALSE	0	0.190676	0.649324	0.42	0.0110514	0.00441486	4.52756	FALSE	FALSE	Stable	Stable
CCNB2	22.1747	22.1278	21.9901	21.8266	21.7311	21.8014	O95067	O95067	CCNB2_HUMAN	CCNB2	G2/mitotic-specific cyclin-B2	O95067	FALSE	0	-0.45735	-0.164955	-0.311152	0.00623531	0.00215526	-5.26137	FALSE	FALSE	Stable	Stable
CCNC	16.9811	17.088	16.9022	15.3889	14.4297	17.523	P24863	P24863	CCNC_HUMAN	CCNC	Cyclin-C	P24863	FALSE	0	-3.09816	0.678321	-1.20992	0.224443	0.166345	-1.58403	FALSE	FALSE	Stable	Stable
CCND1	16.195	15.8859	16.1394	18.8037	18.5848	18.5635	P24385	P24385	CCND1_HUMAN	CCND1	G1/S-specific cyclin-D1	P24385	TRUE	3	2.31591	2.83861	2.57726	2.4892e-05	4.95722e-07	24.3782	TRUE	TRUE	Up	Up
CCND3	18.7069	18.3957	18.5054	19.9767	19.8663	19.5425	P30281	P30281	CCND3_HUMAN	CCND3	G1/S-specific cyclin-D3	P30281	FALSE	0	0.924247	1.59413	1.25919	0.000684131	0.000111385	9.2936	TRUE	TRUE	Up	Up
CCNDBP1	18.5096	17.89	18.4883	18.1499	18.2645	18.0671	O95273	O95273	CCDB1_HUMAN	CCNDBP1	Cyclin-D1-binding protein 1	O95273	FALSE	0	-0.575702	0.304813	-0.135445	0.545635	0.476912	-0.760535	FALSE	FALSE	Stable	Stable
CCNE2	16.0235	16.073	16.5168	15.8936	15.1946	15.9479	O96020	O96020	CCNE2_HUMAN	CCNE2	G1/S-specific cyclin-E2	O96020	TRUE	1	-1.12495	0.0734888	-0.52573	0.114423	0.0750788	-2.16891	FALSE	FALSE	Stable	Stable
CCNH	21.0342	21.0225	21.0147	21.1747	21.2585	21.2369	P51946	P51946	CCNH_HUMAN	CCNH	Cyclin-H	P51946	FALSE	0	0.111838	0.287273	0.199555	0.0048003	0.00155105	5.62394	FALSE	FALSE	Stable	Stable
CCNK	19.8412	19.7942	19.5669	20.3975	19.6057	19.9447	O75909	O75909	CCNK_HUMAN	CCNK	Cyclin-K	O75909	FALSE	0	-0.260116	0.757084	0.248484	0.342274	0.274392	1.20778	FALSE	FALSE	Stable	Stable
CCNL1	18.7981	18.7208	18.757	19.116	19.1653	19.0849	Q9UK58	Q9UK58	CCNL1_HUMAN	CCNL1	Cyclin-L1	Q9UK58	FALSE	0	0.266873	0.459894	0.363383	0.000680695	0.000110454	9.30793	FALSE	FALSE	Stable	Stable
CCNT1	19.7655	19.7176	19.9503	19.9803	20.131	20.0829	O60563	O60563	CCNT1_HUMAN	CCNT1	Cyclin-T1	O60563	FALSE	0	0.0675322	0.4397	0.253616	0.031085	0.0160329	3.36924	FALSE	FALSE	Stable	Stable
CCNT2	17.4593	17.5422	17.1636	16.7862	16.9106	16.8815	O60583	O60583	CCNT2_HUMAN	CCNT2	Cyclin-T2	O60583	FALSE	0	-0.787621	-0.270276	-0.528949	0.00725184	0.00261776	-5.05507	TRUE	TRUE	Down	Down
CCNY	17.7814	18.2042	17.9481	17.8004	17.9036	17.9442	Q8ND76	Q8ND76	CCNY_HUMAN	CCNY	Cyclin-Y	Q8ND76	FALSE	0	-0.372321	0.181988	-0.0951661	0.50086	0.429843	-0.848837	FALSE	FALSE	Stable	Stable
CCNYL1	20.2701	20.1277	19.9561	19.5077	19.3668	19.3546	Q8N7R7	Q8N7R7	CCYL1_HUMAN	CCNYL1	Cyclin-Y-like protein 1	Q8N7R7	FALSE	0	-0.932107	-0.48446	-0.708284	0.0013016	0.000281777	-7.82286	TRUE	TRUE	Down	Down
CCP110	20.347	20.1295	20.2648	20.7666	20.7921	20.8165	O43303	O43303	CP110_HUMAN	CCP110	Centriolar coiled-coil protein of 110 kDa	O43303	FALSE	0	0.393576	0.695716	0.544646	0.000801368	0.000139826	8.91249	TRUE	TRUE	Up	Up
CCPG1	19.3426	19.3919	19.5636	19.8181	19.7405	19.8609	Q9ULG6	Q9ULG6	CCPG1_HUMAN	CCPG1	Cell cycle progression protein 1	Q9ULG6	FALSE	0	0.202944	0.544612	0.373778	0.00557327	0.00188174	5.40883	FALSE	FALSE	Stable	Stable
CCS	21.8143	21.9143	21.8034	21.459	21.5357	21.5104	O14618	O14618	CCS_HUMAN	CCS	Copper chaperone for superoxide dismutase	O14618	FALSE	0	-0.45336	-0.231289	-0.342324	0.00145596	0.000323667	-7.6215	FALSE	FALSE	Stable	Stable
CCSER1	20.3129	20.2675	20.2155	20.0696	20.2061	20.2639	Q9C0I3	Q9C0I3	CCSE1_HUMAN	CCSER1	Serine-rich coiled-coil domain-containing protein 1	Q9C0I3	FALSE	0	-0.234904	0.0639898	-0.085457	0.27199	0.209198	-1.4136	FALSE	FALSE	Stable	Stable
CCSER2	17.1033	17.3472	17.4831	17.5553	17.0169	17.1211	Q9H7U1	Q9H7U1	CCSE2_HUMAN	CCSER2	Serine-rich coiled-coil domain-containing protein 2	Q9H7U1	FALSE	0	-0.495678	0.3354	-0.0801388	0.706499	0.651089	-0.476755	FALSE	FALSE	Stable	Stable
CCSMST1	18.6761	18.5644	19.0552	19.3001	18.7278	19.4037	Q4G0I0	Q4G0I0	CSMT1_HUMAN	CCSMST1	Protein CCSMST1	Q4G0I0	FALSE	0	-0.15629	0.913465	0.378588	0.185888	0.132815	1.74975	FALSE	FALSE	Stable	Stable
CCT2	25.8406	25.8604	25.7258	26.0672	26.0225	26.0489	P78371	P78371	TCPB_HUMAN	CCT2	T-complex protein 1 subunit beta	P78371	FALSE	0	0.122955	0.351588	0.237271	0.00684463	0.00243551	5.13098	FALSE	FALSE	Stable	Stable
CCT3	25.6415	25.7093	25.6786	26.022	26.0072	26.0075	P49368	P49368	TCPG_HUMAN	CCT3	T-complex protein 1 subunit gamma	P49368	FALSE	0	0.25447	0.417076	0.335773	0.000487672	6.66114e-05	10.2095	FALSE	FALSE	Stable	Stable
CCT4	24.9267	24.8908	24.8452	25.2421	25.1913	25.1697	P50991	P50991	TCPD_HUMAN	CCT4	T-complex protein 1 subunit delta	P50991	FALSE	0	0.217563	0.409319	0.313441	0.00115013	0.00023684	8.08165	FALSE	FALSE	Stable	Stable
CCT5	25.0446	25.0872	25.0369	25.4605	25.4421	25.4221	P48643	P48643	TCPE_HUMAN	CCT5	T-complex protein 1 subunit epsilon	P48643	FALSE	0	0.305149	0.465606	0.385378	0.000276293	2.88884e-05	11.8747	FALSE	FALSE	Stable	Stable
CCT6A	25.4242	25.4187	25.4086	25.6945	25.7254	25.7121	P40227	P40227	TCPZ_HUMAN	CCT6A	T-complex protein 1 subunit zeta	P40227	FALSE	0	0.220674	0.366336	0.293505	0.000532088	7.61985e-05	9.96237	FALSE	FALSE	Stable	Stable
CCT6B	18.2779	16.1141	18.2648	18.6359	18.7282	18.5463	Q92526	Q92526	TCPW_HUMAN	CCT6B	T-complex protein 1 subunit zeta-2	Q92526	TRUE	1	-0.402685	2.57182	1.08457	0.174995	0.12356	1.80275	FALSE	FALSE	Stable	Stable
CCT7	25.6789	25.6956	25.624	25.8863	25.9748	25.935	Q99832	Q99832	TCPH_HUMAN	CCT7	T-complex protein 1 subunit eta	Q99832	FALSE	0	0.167632	0.364031	0.265831	0.00242906	0.000640345	6.69208	FALSE	FALSE	Stable	Stable
CCT8	26.0064	25.9713	25.956	26.3114	26.2436	26.3112	P50990	P50990	TCPQ_HUMAN	CCT8	T-complex protein 1 subunit theta	P50990	FALSE	0	0.221494	0.400163	0.310829	0.000907392	0.000169442	8.60137	FALSE	FALSE	Stable	Stable
CCZ1	20.8054	20.7765	21.0096	21.2023	20.9625	21.0542	P86790;P86791	P86791;P86790	CCZ1B_HUMAN;CCZ1_HUMAN	CCZ1;CCZ1B	Vacuolar fusion protein CCZ1 homolog B	P86790	FALSE	0	-0.0109568	0.429319	0.209181	0.0932783	0.0589101	2.34905	FALSE	FALSE	Stable	Stable
CD109	22.5028	22.4491	22.4896	21.7095	21.611	21.5621	Q6YHK3	Q6YHK3	CD109_HUMAN	CD109	CD109 antigen	Q6YHK3	FALSE	0	-0.971045	-0.734776	-0.85291	6.7117e-05	2.92337e-06	-17.848	TRUE	TRUE	Down	Down
CD14	20.7023	20.7658	20.5155	19.3637	19.295	19.3935	P08571	P08571	CD14_HUMAN	CD14	Monocyte differentiation antigen CD14	P08571	FALSE	0	-1.49065	-1.13037	-1.31051	6.52916e-05	2.80001e-06	-17.9843	TRUE	TRUE	Down	Down
CD151	24.8674	24.8534	24.8756	24.7733	24.5357	24.616	P48509	P48509	CD151_HUMAN	CD151	CD151 antigen	P48509	FALSE	0	-0.384208	-0.0634141	-0.223811	0.0288097	0.0145663	-3.44945	FALSE	FALSE	Stable	Stable
CD274	15.8835	16.2694	15.906	18.3798	18.7046	18.6287	Q9NZQ7	Q9NZQ7	PD1L1_HUMAN	CD274	Programmed cell death 1 ligand 1	Q9NZQ7	TRUE	3	2.21655	2.8862	2.55138	5.62803e-05	2.15264e-06	18.8373	TRUE	TRUE	Up	Up
CD276	22.1737	22.0411	22.1434	21.6142	21.6904	21.5454	Q5ZPR3	Q5ZPR3	CD276_HUMAN	CD276	CD276 antigen	Q5ZPR3	FALSE	0	-0.64111	-0.364325	-0.502717	0.000780703	0.000134223	-8.98	TRUE	TRUE	Down	Down
CD2AP	23.3528	23.4522	23.4183	23.2285	23.263	23.2927	Q9Y5K6	Q9Y5K6	CD2AP_HUMAN	CD2AP	CD2-associated protein	Q9Y5K6	FALSE	0	-0.246119	-0.0466477	-0.146383	0.0242527	0.0118031	-3.62832	FALSE	FALSE	Stable	Stable
CD2BP2	22.2496	22.1961	22.3644	22.3285	22.4338	22.4632	O95400	O95400	CD2B2_HUMAN	CD2BP2	CD2 antigen cytoplasmic tail-binding protein 2	O95400	FALSE	0	-0.0113656	0.288291	0.138463	0.1003	0.0642338	2.28456	FALSE	FALSE	Stable	Stable
CD320	20.2506	20.2527	20.2992	20.732	20.8396	20.8154	Q9NPF0	Q9NPF0	CD320_HUMAN	CD320	CD320 antigen	Q9NPF0	FALSE	0	0.42589	0.630405	0.528148	0.000211462	1.92808e-05	12.7681	TRUE	TRUE	Up	Up
CD44	26.0715	26.1061	25.9875	26.3537	26.3663	26.326	P16070	P16070	CD44_HUMAN	CD44	CD44 antigen	P16070	FALSE	0	0.190025	0.397276	0.29365	0.00201563	0.000504622	7.00531	FALSE	FALSE	Stable	Stable
CD46	23.0575	22.949	22.8879	23.2665	23.3813	23.2816	P15529	P15529	MCP_HUMAN	CD46	Membrane cofactor protein	P15529	FALSE	0	0.200673	0.489315	0.344994	0.00394131	0.00121006	5.90943	FALSE	FALSE	Stable	Stable
CD47	19.8832	19.9433	20.0738	20.246	20.2398	20.343	Q08722	Q08722	CD47_HUMAN	CD47	Leukocyte surface antigen CD47	Q08722	FALSE	0	0.157626	0.461381	0.309504	0.00734945	0.00266151	5.03774	FALSE	FALSE	Stable	Stable
CD55	21.8682	21.8962	21.9039	22.1909	22.1409	22.0588	P08174	P08174	DAF_HUMAN	CD55	Complement decay-accelerating factor	P08174	FALSE	0	0.132715	0.3488	0.240758	0.00520205	0.00171905	5.50872	FALSE	FALSE	Stable	Stable
CD58	21.3189	21.3873	21.3574	21.187	21.0733	21.1016	P19256	P19256	LFA3_HUMAN	CD58	Lymphocyte function-associated antigen 3	P19256	FALSE	0	-0.341115	-0.126697	-0.233906	0.00564014	0.00190813	-5.39357	FALSE	FALSE	Stable	Stable
CD59	24.3354	24.4014	23.982	24.1974	24.1984	24.3193	P13987	P13987	CD59_HUMAN	CD59	CD59 glycoprotein	P13987	FALSE	0	-0.290747	0.288275	-0.00123624	0.993725	0.991934	-0.0105561	FALSE	FALSE	Stable	Stable
CD63	24.6368	24.657	24.6039	24.3416	24.1804	24.2918	P08962	P08962	CD63_HUMAN	CD63	CD63 antigen	P08962	FALSE	0	-0.485933	-0.23669	-0.361311	0.0018519	0.000447672	-7.16724	FALSE	FALSE	Stable	Stable
CD68	17.6957	18.5463	17.3189	19.5247	19.194	18.9065	P34810	P34810	CD68_HUMAN	CD68	Macrosialin	P34810	FALSE	0	0.518263	2.19127	1.35477	0.0171583	0.00771403	4.00369	FALSE	FALSE	Up	Stable
CD70	21.3836	21.1611	21.2064	15.8597	15.862	15.983	P32970	P32970	CD70_HUMAN	CD70	CD70 antigen	P32970	TRUE	3	-5.52623	-5.17137	-5.3488	8.94474e-07	8.1354e-10	-74.5251	TRUE	TRUE	Down	Down
CD81	19.0896	18.9008	19.1434	19.6033	19.457	19.4827	P60033	P60033	CD81_HUMAN	CD81	CD81 antigen	P60033	FALSE	0	0.278716	0.660754	0.469735	0.00351991	0.00104849	6.07913	FALSE	FALSE	Stable	Stable
CD82	22.2067	22.2311	22.1485	23.0133	22.9906	23.0144	P27701	P27701	CD82_HUMAN	CD82	CD82 antigen	P27701	FALSE	0	0.723011	0.898299	0.810655	2.9834e-05	7.1452e-07	22.8653	TRUE	TRUE	Up	Up
CD9	20.4829	20.6156	20.5698	20.7445	20.9602	20.4693	P21926	P21926	CD9_HUMAN	CD9	CD9 antigen	P21926	FALSE	0	-0.142899	0.479944	0.168523	0.295761	0.231391	1.33775	FALSE	FALSE	Stable	Stable
CD99L2	17.8429	17.4167	17.4733	17.1214	17.2553	17.0774	Q8TCZ2	Q8TCZ2	C99L2_HUMAN	CD99L2	CD99 antigen-like protein 2	Q8TCZ2	FALSE	0	-0.730999	-0.121556	-0.426278	0.028576	0.014415	-3.45823	FALSE	FALSE	Stable	Stable
CDAN1	19.8887	19.883	19.826	19.9448	19.7958	19.7542	Q8IWY9	Q8IWY9	CDAN1_HUMAN	CDAN1	Codanin-1	Q8IWY9	FALSE	0	-0.178502	0.109891	-0.0343052	0.639461	0.578768	-0.588125	FALSE	FALSE	Stable	Stable
CDC123	22.3481	22.0847	22.3416	22.3357	22.454	22.4323	O75794	O75794	CD123_HUMAN	CDC123	Cell division cycle protein 123 homolog	O75794	FALSE	0	-0.0568146	0.355174	0.14918	0.177212	0.12568	1.79027	FALSE	FALSE	Stable	Stable
CDC16	21.7905	21.7861	21.8019	21.6568	21.6565	21.7001	Q13042	Q13042	CDC16_HUMAN	CDC16	Cell division cycle protein 16 homolog	Q13042	FALSE	0	-0.198307	-0.045194	-0.12175	0.0183248	0.00835787	-3.93145	FALSE	FALSE	Stable	Stable
CDC20	19.1408	19.4642	19.5726	19.8537	19.8075	19.6523	Q12834	Q12834	CDC20_HUMAN	CDC20	Cell division cycle protein 20 homolog	Q12834	FALSE	0	0.0752433	0.682064	0.378654	0.0414852	0.0227003	3.08515	FALSE	FALSE	Stable	Stable
CDC23	22.1615	22.1089	22.1255	22.0648	21.955	22.0624	Q9UJX2	Q9UJX2	CDC23_HUMAN	CDC23	Cell division cycle protein 23 homolog	Q9UJX2	FALSE	0	-0.211708	0.00249542	-0.104606	0.0866829	0.0539793	-2.41449	FALSE	FALSE	Stable	Stable
CDC25B	19.385	19.5222	19.3183	19.3062	19.2978	19.2089	P30305	P30305	MPIP2_HUMAN	CDC25B	M-phase inducer phosphatase 2	P30305	FALSE	0	-0.293367	0.0182919	-0.137538	0.112715	0.0737706	-2.1819	FALSE	FALSE	Stable	Stable
CDC25C	20.9023	20.9475	21.0082	21.0452	20.9922	21.0567	P30307	P30307	MPIP3_HUMAN	CDC25C	M-phase inducer phosphatase 3	P30307	FALSE	0	-0.0239998	0.18142	0.0787103	0.157025	0.109038	1.89445	FALSE	FALSE	Stable	Stable
CDC26	21.3181	21.3784	21.23	21.1162	20.9996	21.413	Q8NHZ8	Q8NHZ8	CDC26_HUMAN	CDC26	Anaphase-promoting complex subunit CDC26	Q8NHZ8	FALSE	0	-0.410124	0.144976	-0.132574	0.352799	0.284147	-1.18081	FALSE	FALSE	Stable	Stable
CDC27	21.7667	21.829	21.7798	21.6588	21.5987	21.6769	P30260	P30260	CDC27_HUMAN	CDC27	Cell division cycle protein 27 homolog	P30260	FALSE	0	-0.240729	-0.0533615	-0.147045	0.0191724	0.00885163	-3.88017	FALSE	FALSE	Stable	Stable
CDC34	21.2979	21.415	21.384	21.1323	21.2244	21.3199	P49427	P49427	UB2R1_HUMAN	CDC34	Ubiquitin-conjugating enzyme E2 R1	P49427	FALSE	0	-0.290217	0.00997793	-0.14012	0.0975731	0.0622633	-2.30775	FALSE	FALSE	Stable	Stable
CDC37	25.2321	25.3492	25.2899	25.293	25.5163	25.3987	Q16543	Q16543	CDC37_HUMAN	CDC37	Hsp90 co-chaperone Cdc37	Q16543	FALSE	0	-0.053252	0.277737	0.112243	0.202165	0.146709	1.67663	FALSE	FALSE	Stable	Stable
CDC37L1	19.9674	20.1454	20.0365	19.551	19.6713	19.6461	Q7L3B6	Q7L3B6	CD37L_HUMAN	CDC37L1	Hsp90 co-chaperone Cdc37-like 1	Q7L3B6	FALSE	0	-0.57515	-0.278754	-0.426952	0.00189727	0.000462801	-7.12199	FALSE	FALSE	Stable	Stable
CDC40	21.4397	21.4066	21.2735	21.6328	21.4618	21.4704	O60508	O60508	PRP17_HUMAN	CDC40	Pre-mRNA-processing factor 17	O60508	FALSE	0	-0.0217545	0.318559	0.148402	0.115844	0.0763987	2.15603	FALSE	FALSE	Stable	Stable
CDC42	24.9487	25.0712	25.0219	25.2672	25.279	25.2163	P60953	P60953	CDC42_HUMAN	CDC42	Cell division control protein 42 homolog	P60953	FALSE	0	0.131482	0.348999	0.24024	0.0053872	0.00179519	5.46068	FALSE	FALSE	Stable	Stable
CDC42BPA	20.0846	20.0279	20.073	20.1027	20.036	20.1039	Q5VT25	Q5VT25	MRCKA_HUMAN	CDC42BPA	Serine/threonine-protein kinase MRCK alpha	Q5VT25	FALSE	0	-0.0720132	0.110046	0.0190163	0.682051	0.624781	0.516426	FALSE	FALSE	Stable	Stable
CDC42BPB	21.8467	21.8247	21.93	21.8628	21.8275	21.82	Q9Y5S2	Q9Y5S2	MRCKB_HUMAN	CDC42BPB	Serine/threonine-protein kinase MRCK beta	Q9Y5S2	FALSE	0	-0.130272	0.0695084	-0.0303819	0.55023	0.481709	-0.751892	FALSE	FALSE	Stable	Stable
CDC42EP1	19.4658	19.7023	19.7375	19.6239	19.6163	19.5292	Q00587	Q00587	BORG5_HUMAN	CDC42EP1	Cdc42 effector protein 1	Q00587	FALSE	0	-0.244607	0.153791	-0.0454077	0.654236	0.594331	-0.563517	FALSE	FALSE	Stable	Stable
CDC42EP2	20.9152	20.8678	21.0682	20.716	21.1787	21.0158	O14613	O14613	BORG1_HUMAN	CDC42EP2	Cdc42 effector protein 2	O14613	FALSE	0	-0.293863	0.333363	0.0197499	0.903115	0.881599	0.15568	FALSE	FALSE	Stable	Stable
CDC42EP3	20.0532	19.8262	20.0461	19.6597	19.9906	19.7296	Q9UKI2	Q9UKI2	BORG2_HUMAN	CDC42EP3	Cdc42 effector protein 3	Q9UKI2	FALSE	0	-0.44926	0.0854856	-0.181887	0.200955	0.145702	-1.6817	FALSE	FALSE	Stable	Stable
CDC42EP4	20.3114	20.6987	20.5014	20.0317	20.3346	20.4207	Q9H3Q1	Q9H3Q1	BORG4_HUMAN	CDC42EP4	Cdc42 effector protein 4	Q9H3Q1	FALSE	0	-0.583604	0.100623	-0.24149	0.186894	0.133678	-1.74499	FALSE	FALSE	Stable	Stable
CDC42SE1	19.0657	18.8702	18.7868	19.0189	18.9696	18.8017	Q9NRR8	Q9NRR8	C42S1_HUMAN	CDC42SE1	CDC42 small effector protein 1	Q9NRR8	FALSE	0	-0.205995	0.25104	0.0225225	0.849654	0.815952	0.243646	FALSE	FALSE	Stable	Stable
CDC45	21.4816	21.4007	21.4475	21.0915	21.1093	21.1887	O75419	O75419	CDC45_HUMAN	CDC45	Cell division control protein 45 homolog	O75419	FALSE	0	-0.41838	-0.208612	-0.313496	0.00164181	0.000381315	-7.38902	FALSE	FALSE	Stable	Stable
CDC5L	23.8253	23.7893	23.803	23.844	23.8303	23.8839	Q99459	Q99459	CDC5L_HUMAN	CDC5L	Cell division cycle 5-like protein	Q99459	FALSE	0	-0.0333434	0.127139	0.0468979	0.263081	0.200639	1.44484	FALSE	FALSE	Stable	Stable
CDC6	19.25	19.3965	19.2453	18.5583	18.9705	18.8408	Q99741	Q99741	CDC6_HUMAN	CDC6	Cell division control protein 6 homolog	Q99741	FALSE	0	-0.787044	-0.227776	-0.50741	0.0114165	0.00460924	-4.48573	FALSE	FALSE	Down	Stable
CDC7	19.0591	19.0966	18.9689	18.6285	18.7636	18.7806	O00311	O00311	CDC7_HUMAN	CDC7	Cell division cycle 7-related protein kinase	O00311	FALSE	0	-0.461601	-0.173034	-0.317317	0.00547554	0.00183455	-5.43676	FALSE	FALSE	Stable	Stable
CDC73	22.8622	22.8132	22.8194	22.7818	22.7161	22.7431	Q6P1J9	Q6P1J9	CDC73_HUMAN	CDC73	Parafibromin	Q6P1J9	FALSE	0	-0.170769	0.001583	-0.0845931	0.0854893	0.0531101	-2.42668	FALSE	FALSE	Stable	Stable
CDCA2	19.3804	19.5587	19.6442	19.3207	19.5436	19.5415	Q69YH5	Q69YH5	CDCA2_HUMAN	CDCA2	Cell division cycle-associated protein 2	Q69YH5	FALSE	0	-0.290937	0.172673	-0.0591323	0.61585	0.55248	-0.630617	FALSE	FALSE	Stable	Stable
CDCA3	20.2443	20.5	20.0466	20.6589	20.7752	20.8997	Q99618	Q99618	CDCA3_HUMAN	CDCA3	Cell division cycle-associated protein 3	Q99618	FALSE	0	0.200451	0.828178	0.514315	0.016502	0.00732335	4.05091	FALSE	FALSE	Up	Stable
CDCA5	20.845	21.0819	21.1221	20.8063	20.9524	20.9174	Q96FF9	Q96FF9	CDCA5_HUMAN	CDCA5	Sororin	Q96FF9	FALSE	0	-0.336015	0.0874247	-0.124295	0.261565	0.198911	-1.4513	FALSE	FALSE	Stable	Stable
CDCA7	15.4407	16.6743	15.8749	16.1039	15.5578	16.39	Q9BWT1	Q9BWT1	CDCA7_HUMAN	CDCA7	Cell division cycle-associated protein 7	Q9BWT1	TRUE	2	-0.880442	0.92174	0.0206489	0.964189	0.956739	0.0566491	FALSE	FALSE	Stable	Stable
CDCA7L	20.8886	20.9072	20.8433	20.9348	20.9234	20.8344	Q96GN5	Q96GN5	CDA7L_HUMAN	CDCA7L	Cell division cycle-associated 7-like protein	Q96GN5	FALSE	0	-0.0855245	0.121166	0.0178208	0.737213	0.685375	0.426285	FALSE	FALSE	Stable	Stable
CDCA8	19.4518	19.2768	19.0882	19.6624	19.2055	19.5607	Q53HL2	Q53HL2	BOREA_HUMAN	CDCA8	Borealin	Q53HL2	FALSE	0	-0.160931	0.568774	0.203921	0.281466	0.218286	1.38169	FALSE	FALSE	Stable	Stable
CDCP1	22.8307	22.7784	22.7699	22.2115	22.1098	22.1971	Q9H5V8	Q9H5V8	CDCP1_HUMAN	CDCP1	CUB domain-containing protein 1	Q9H5V8	FALSE	0	-0.723584	-0.51679	-0.620187	0.00012441	8.33279e-06	-14.8279	TRUE	TRUE	Down	Down
CDH13	20.4351	20.3639	20.2078	21.2152	21.2768	21.2436	P55290	P55290	CAD13_HUMAN	CDH13	Cadherin-13	P55290	FALSE	0	0.750417	1.06878	0.909599	0.000148841	1.09451e-05	14.126	TRUE	TRUE	Up	Up
CDH2	23.0479	23.1689	23.1225	22.9297	22.9411	22.888	P19022	P19022	CADH2_HUMAN	CDH2	Cadherin-2	P19022	FALSE	0	-0.299579	-0.0874174	-0.193498	0.0112181	0.00449878	-4.50925	FALSE	FALSE	Stable	Stable
CDH4	13.9088	16.4079	15.8987	18.6483	18.5024	18.838	P55283	P55283	CADH4_HUMAN	CDH4	Cadherin-4	P55283	TRUE	2	1.67249	4.84301	3.25775	0.00709775	0.00255574	5.0802	TRUE	TRUE	Up	Up
CDIPT	23.0728	23.1233	23.0938	22.8482	22.8506	22.8428	O14735	O14735	CDIPT_HUMAN	CDIPT	CDP-diacylglycerol--inositol 3-phosphatidyltransferase	O14735	FALSE	0	-0.32565	-0.173221	-0.249436	0.00114543	0.00023543	-8.09068	FALSE	FALSE	Stable	Stable
CDK1	23.1498	23.1932	23.1012	23.0343	23.3974	23.1289	P06493	P06493	CDK1_HUMAN	CDK1	Cyclin-dependent kinase 1	P06493	FALSE	0	-0.202178	0.279852	0.0388368	0.754224	0.704722	0.398349	FALSE	FALSE	Stable	Stable
CDK11B	22.8578	22.8299	22.8541	22.8909	22.8847	22.8644	P21127	P21127;Q9UQ88	CD11B_HUMAN	CDK11B	Cyclin-dependent kinase 11B	P21127	FALSE	0	-0.0412224	0.106693	0.0327354	0.387354	0.317515	1.0942	FALSE	FALSE	Stable	Stable
CDK12	19.6484	19.7629	19.4869	19.986	20.025	20.049	Q9NYV4	Q9NYV4	CDK12_HUMAN	CDK12	Cyclin-dependent kinase 12	Q9NYV4	FALSE	0	0.204186	0.570315	0.387251	0.00638561	0.00222037	5.22941	FALSE	FALSE	Stable	Stable
CDK13	21.0783	21.003	20.9708	21.0317	21.0071	21.1293	Q14004	Q14004	CDK13_HUMAN	CDK13	Cyclin-dependent kinase 13	Q14004	FALSE	0	-0.0841264	0.161548	0.0387108	0.536062	0.46675	0.779052	FALSE	FALSE	Stable	Stable
CDK14	18.3453	18.3679	18.6938	18.3101	18.3921	18.486	O94921	O94921;Q96Q40	CDK14_HUMAN	CDK14	Cyclin-dependent kinase 14	O94921	FALSE	0	-0.33681	0.191031	-0.0728898	0.58756	0.521275	-0.682743	FALSE	FALSE	Stable	Stable
CDK16	21.1468	21.0732	20.8764	21.3741	21.2719	21.1855	Q00536	O94921;Q00536	CDK16_HUMAN	CDK16	Cyclin-dependent kinase 16	Q00536	FALSE	0	0.0325761	0.457535	0.245056	0.0533726	0.0305045	2.85109	FALSE	FALSE	Stable	Stable
CDK17	20.9007	20.8842	20.8512	21.2207	21.2289	21.2111	Q00537	Q00536;Q00537	CDK17_HUMAN	CDK17	Cyclin-dependent kinase 17	Q00537	FALSE	0	0.264832	0.418272	0.341552	0.000367888	4.40332e-05	11.0056	FALSE	FALSE	Stable	Stable
CDK18	20.0079	19.9235	19.9672	19.2308	19.2236	19.2138	Q07002	Q07002	CDK18_HUMAN	CDK18	Cyclin-dependent kinase 18	Q07002	FALSE	0	-0.830117	-0.656885	-0.743501	3.92029e-05	1.09349e-06	-21.2202	TRUE	TRUE	Down	Down
CDK19	21.0426	20.8743	20.9327	20.6635	20.6348	20.7203	Q9BWU1	Q9BWU1	CDK19_HUMAN	CDK19	Cyclin-dependent kinase 19	Q9BWU1	FALSE	0	-0.410744	-0.14327	-0.277007	0.00688613	0.00246003	-5.12039	FALSE	FALSE	Stable	Stable
CDK2	24.0822	23.9902	23.9895	24.1368	24.091	24.1541	P24941	P24941	CDK2_HUMAN	CDK2	Cyclin-dependent kinase 2	P24941	FALSE	0	0.00467834	0.208655	0.106666	0.07167	0.0430482	2.58549	FALSE	FALSE	Stable	Stable
CDK2AP1	17.3896	17.1352	16.8965	16.1961	17.1133	17.1113	O14519	O14519	CDKA1_HUMAN	CDK2AP1	Cyclin-dependent kinase 2-associated protein 1	O14519	FALSE	0	-1.03136	0.364283	-0.333539	0.352557	0.283862	-1.18159	FALSE	FALSE	Stable	Stable
CDK4	23.1413	23.0891	23.0574	22.9258	22.9099	22.8431	P11802	P11802	CDK4_HUMAN	CDK4	Cyclin-dependent kinase 4	P11802	FALSE	0	-0.303715	-0.102269	-0.202992	0.00767683	0.00280775	-4.98211	FALSE	FALSE	Stable	Stable
CDK5	22.093	21.9969	22.1025	21.5189	21.5047	21.4345	Q00535	Q00535	CDK5_HUMAN	CDK5	Cyclin-dependent kinase 5	Q00535	FALSE	0	-0.690375	-0.465893	-0.578134	0.000213203	1.95768e-05	-12.7333	TRUE	TRUE	Down	Down
CDK5RAP1	20.6853	20.5953	20.545	20.8849	21.0826	21.0132	Q96SZ6	Q96SZ6	CK5P1_HUMAN	CDK5RAP1	Mitochondrial tRNA methylthiotransferase CDK5RAP1	Q96SZ6	FALSE	0	0.22302	0.547101	0.385061	0.00403588	0.00124678	5.87449	FALSE	FALSE	Stable	Stable
CDK5RAP2	20.9178	20.9112	20.9212	20.8978	20.7613	20.7479	Q96SN8	Q96SN8	CK5P2_HUMAN	CDK5RAP2	CDK5 regulatory subunit-associated protein 2	Q96SN8	FALSE	0	-0.235475	0.00659323	-0.114441	0.0945297	0.0598343	-2.33742	FALSE	FALSE	Stable	Stable
CDK5RAP3	21.5586	21.628	21.5471	21.8619	21.8236	21.8536	Q96JB5	Q96JB5	CK5P3_HUMAN	CDK5RAP3	CDK5 regulatory subunit-associated protein 3	Q96JB5	FALSE	0	0.17817	0.358829	0.2685	0.00167791	0.000392629	7.34818	FALSE	FALSE	Stable	Stable
CDK6	21.7632	21.6734	21.6183	20.2609	20.2448	20.0802	Q00534	Q00534	CDK6_HUMAN	CDK6	Cyclin-dependent kinase 6	Q00534	FALSE	0	-1.65274	-1.32655	-1.48965	3.12131e-05	7.67766e-07	-22.5789	TRUE	TRUE	Down	Down
CDK7	21.946	21.9604	21.9768	22.1996	22.2215	22.2329	P50613	P50613	CDK7_HUMAN	CDK7	Cyclin-dependent kinase 7	P50613	FALSE	0	0.181976	0.331832	0.256904	0.000953827	0.000183395	8.47601	FALSE	FALSE	Stable	Stable
CDK8	16.3808	16.7918	16.4755	16.4691	17.129	16.8217	P49336	P49336	CDK8_HUMAN	CDK8	Cyclin-dependent kinase 8	P49336	FALSE	0	-0.216828	0.731314	0.257243	0.294472	0.230269	1.34142	FALSE	FALSE	Stable	Stable
CDK9	21.9752	21.8957	21.8194	21.9458	21.9065	22.0491	P50750	P50750	CDK9_HUMAN	CDK9	Cyclin-dependent kinase 9	P50750	FALSE	0	-0.0750751	0.21577	0.0703474	0.347048	0.278666	1.19586	FALSE	FALSE	Stable	Stable
CDKAL1	21.865	21.746	21.8171	21.6471	21.7748	21.6885	Q5VV42	Q5VV42	CDKAL_HUMAN	CDKAL1	Threonylcarbamoyladenosine tRNA methylthiotransferase	Q5VV42	FALSE	0	-0.232273	0.0203632	-0.105955	0.127461	0.0854389	-2.07357	FALSE	FALSE	Stable	Stable
CDKL5	15.6262	16.1461	16.0826	16.0975	15.2079	16.1592	O76039	O76039	CDKL5_HUMAN	CDKL5	Cyclin-dependent kinase-like 5	O76039	TRUE	2	-0.851052	0.590863	-0.130095	0.724742	0.671822	-0.446081	FALSE	FALSE	Stable	Stable
CDKN2A	21.09	21.0639	21.0973	21.0303	20.8186	20.9196	P42771	P42771;P42772	CDN2A_HUMAN	CDKN2A	Cyclin-dependent kinase inhibitor 2A	P42771	FALSE	0	-0.306433	-0.0153812	-0.160907	0.0608706	0.0354955	-2.73337	FALSE	FALSE	Stable	Stable
CDKN2A.1	22.1038	21.943	22.0127	21.1588	21.2735	20.9183	Q8N726	Q8N726	ARF_HUMAN	CDKN2A	Tumor suppressor ARF	Q8N726	FALSE	0	-1.14905	-0.656858	-0.902952	0.000751215	0.000127121	-9.07041	TRUE	TRUE	Down	Down
CDKN2AIP	21.0106	21.0164	20.9439	20.9547	20.7908	20.9139	Q9NXV6	Q9NXV6	CARF_HUMAN	CDKN2AIP	CDKN2A-interacting protein	Q9NXV6	FALSE	0	-0.236036	0.0283835	-0.103826	0.14873	0.102282	-1.94137	FALSE	FALSE	Stable	Stable
CDKN2AIPNL	18.4894	19.0496	18.6752	18.4642	18.3186	18.3101	Q96HQ2	Q96HQ2	C2AIL_HUMAN	CDKN2AIPNL	CDKN2AIP N-terminal-like protein	Q96HQ2	FALSE	0	-0.735306	-0.0122517	-0.373779	0.0741363	0.0447587	-2.55586	FALSE	FALSE	Stable	Stable
CDKN2C	19.9806	20.1808	20.0051	19.4458	19.4834	19.1597	P42773	P42773	CDN2C_HUMAN	CDKN2C	Cyclin-dependent kinase 4 inhibitor C	P42773	FALSE	0	-0.949639	-0.43545	-0.692544	0.00247022	0.000656922	-6.65916	TRUE	TRUE	Down	Down
CDKN3	17.456	15.574	16.8979	17.7775	17.0036	17.5059	Q16667	Q16667	CDKN3_HUMAN	CDKN3	Cyclin-dependent kinase inhibitor 3	Q16667	FALSE	0	-0.456783	2.0295	0.786357	0.229651	0.170974	1.56374	FALSE	FALSE	Stable	Stable
CDR2	18.1338	18.8934	18.7958	17.9683	18.2259	18.3502	Q01850	Q01850	CDR2_HUMAN	CDR2	Cerebellar degeneration-related protein 2	Q01850	FALSE	0	-0.974217	0.121721	-0.426248	0.151883	0.10488	-1.92296	FALSE	FALSE	Stable	Stable
CDR2L	19.0826	19.1002	18.9834	18.383	18.4382	18.4032	Q86X02	Q86X02	CDR2L_HUMAN	CDR2L	Cerebellar degeneration-related protein 2-like	Q86X02	FALSE	0	-0.754954	-0.53963	-0.647292	0.000123747	8.22322e-06	-14.8628	TRUE	TRUE	Down	Down
CDS2	20.0779	20.3493	20.2262	20.2951	20.3045	20.1157	O95674	O95674	CDS2_HUMAN	CDS2	Phosphatidate cytidylyltransferase 2	O95674	FALSE	0	-0.196256	0.237452	0.0205984	0.854615	0.822478	0.234817	FALSE	FALSE	Stable	Stable
CDT1	18.4874	18.3598	18.4635	18.799	18.9236	18.8829	Q9H211	Q9H211	CDT1_HUMAN	CDT1	DNA replication factor Cdt1	Q9H211	FALSE	0	0.300829	0.562316	0.431573	0.00110597	0.000224897	8.16013	FALSE	FALSE	Stable	Stable
CDV3	19.219	19.0929	19.3614	18.5442	19.022	18.7496	Q9UKY7	Q9UKY7	CDV3_HUMAN	CDV3	Protein CDV3 homolog	Q9UKY7	FALSE	0	-0.786681	-0.118216	-0.452449	0.0317988	0.0164789	-3.34645	FALSE	FALSE	Stable	Stable
CDYL	19.5551	19.4933	19.6731	19.5112	19.3956	19.4706	Q9Y232	Q9Y232	CDYL_HUMAN	CDYL	Chromodomain Y-like protein	Q9Y232	FALSE	0	-0.261563	0.0321003	-0.114732	0.150376	0.103646	-1.93164	FALSE	FALSE	Stable	Stable
CEBPB	20.6254	20.6129	20.6055	20.399	20.3832	20.5917	P17676	P17676	CEBPB_HUMAN	CEBPB	CCAAT/enhancer-binding protein beta	P17676	FALSE	0	-0.311809	-0.00139376	-0.156601	0.0792919	0.0485504	-2.49429	FALSE	FALSE	Stable	Stable
CEBPZ	21.4972	21.5145	21.4682	21.5274	21.5296	21.5955	Q03701	Q03701	CEBPZ_HUMAN	CEBPZ	CCAAT/enhancer-binding protein zeta	Q03701	FALSE	0	-0.0306399	0.145662	0.0575112	0.217482	0.159982	1.61283	FALSE	FALSE	Stable	Stable
CELF1	21.8937	21.7007	21.586	21.8811	21.8253	21.7164	Q92879	Q92879	CELF1_HUMAN	CELF1	CUGBP Elav-like family member 1	Q92879	FALSE	0	-0.14057	0.302264	0.0808472	0.474155	0.402894	0.902647	FALSE	FALSE	Stable	Stable
CELSR1	21.3241	21.3675	21.4503	20.7464	20.7901	20.7753	Q9NYQ6	Q9NYQ6	CELR1_HUMAN	CELSR1	Cadherin EGF LAG seven-pass G-type receptor 1	Q9NYQ6	FALSE	0	-0.716766	-0.503272	-0.610019	0.000148841	1.09404e-05	-14.1271	TRUE	TRUE	Down	Down
CELSR3	16.5564	17.0312	16.9349	16.2127	15.7595	15.8534	Q9NYQ7	Q9NYQ7	CELR3_HUMAN	CELSR3	Cadherin EGF LAG seven-pass G-type receptor 3	Q9NYQ7	TRUE	3	-1.31729	-0.480672	-0.898979	0.00600044	0.0020551	-5.31274	TRUE	TRUE	Down	Down
CEMIP2	21.2843	21.3103	21.3016	21.8827	21.8816	21.9121	Q9UHN6	Q9UHN6	CEIP2_HUMAN	CEMIP2	Cell surface hyaluronidase	Q9UHN6	FALSE	0	0.518907	0.667876	0.593391	4.79045e-05	1.67188e-06	19.6943	TRUE	TRUE	Up	Up
CENATAC	19.5896	19.2677	18.9347	18.8168	18.8595	18.5475	Q86UT8	Q86UT8	CATAC_HUMAN	CENATAC	Centrosomal AT-AC splicing factor	Q86UT8	FALSE	0	-0.966751	-0.0787525	-0.522752	0.0499364	0.028277	-2.91056	FALSE	FALSE	Stable	Stable
CENPB	21.1671	20.9149	21.0707	21.1975	21.257	21.0738	P07199	P07199	CENPB_HUMAN	CENPB	Major centromere autoantigen B	P07199	FALSE	0	-0.0752258	0.325678	0.125226	0.235374	0.175508	1.54436	FALSE	FALSE	Stable	Stable
CENPC	20.68	20.7777	20.6437	20.6081	20.5633	20.6207	Q03188	Q03188	CENPC_HUMAN	CENPC	Centromere protein C	Q03188	FALSE	0	-0.216913	0.0107374	-0.103088	0.105722	0.0683075	-2.23889	FALSE	FALSE	Stable	Stable
CENPE	19.0797	19.0385	19.2064	19.2403	19.2281	19.1803	Q02224	Q02224	CENPE_HUMAN	CENPE	Centromere-associated protein E	Q02224	FALSE	0	-0.0228687	0.238956	0.108044	0.132375	0.089398	2.04025	FALSE	FALSE	Stable	Stable
CENPF	24.363	24.3691	24.3602	24.3782	24.4365	24.4224	P49454	P49454	CENPF_HUMAN	CENPF	Centromere protein F	P49454	FALSE	0	-0.0305667	0.127121	0.048277	0.24355	0.182917	1.51369	FALSE	FALSE	Stable	Stable
CENPH	20.8991	20.9016	20.7459	20.8414	20.8358	20.7989	Q9H3R5	Q9H3R5	CENPH_HUMAN	CENPH	Centromere protein H	Q9H3R5	FALSE	0	-0.153435	0.106511	-0.0234619	0.724742	0.67171	-0.446245	FALSE	FALSE	Stable	Stable
CENPI	20.3586	20.4023	20.3674	20.1257	20.0836	20.1279	Q92674	Q92674	CENPI_HUMAN	CENPI	Centromere protein I	Q92674	FALSE	0	-0.344406	-0.182981	-0.263693	0.00115336	0.000237654	-8.07647	FALSE	FALSE	Stable	Stable
CENPK	19.6673	19.6866	19.7182	19.1812	19.2918	19.2779	Q9BS16	Q9BS16	CENPK_HUMAN	CENPK	Centromere protein K	Q9BS16	FALSE	0	-0.545	-0.335806	-0.440403	0.000454627	5.98949e-05	-10.4087	FALSE	FALSE	Stable	Stable
CENPL	19.6291	19.4011	19.458	19.3871	19.4237	19.4131	Q8N0S6	Q8N0S6	CENPL_HUMAN	CENPL	Centromere protein L	Q8N0S6	FALSE	0	-0.247147	0.0709631	-0.0880922	0.285387	0.221952	-1.36916	FALSE	FALSE	Stable	Stable
CENPM	18.8824	17.6015	17.4547	18.0001	16.3705	16.8833	Q9NSP4	Q9NSP4	CENPM_HUMAN	CENPM	Centromere protein M	Q9NSP4	FALSE	0	-2.2588	0.469023	-0.894889	0.21535	0.158008	-1.62199	FALSE	FALSE	Stable	Stable
CENPN	17.9803	18.1104	18.0841	18.0384	17.757	17.4683	Q96H22	Q96H22	CENPN_HUMAN	CENPN	Centromere protein N	Q96H22	FALSE	0	-0.659498	0.052092	-0.303703	0.122235	0.0813003	-2.11015	FALSE	FALSE	Stable	Stable
CENPO	17.9057	18.1044	18.0325	17.8092	17.5408	17.9754	Q9BU64	Q9BU64	CENPO_HUMAN	CENPO	Centromere protein O	Q9BU64	FALSE	0	-0.53443	0.0562848	-0.239073	0.138712	0.0943024	-2.00099	FALSE	FALSE	Stable	Stable
CENPP	17.4853	17.1004	16.6236	16.6321	16.486	16.1871	Q6IPU0	Q6IPU0	CENPP_HUMAN	CENPP	Centromere protein P	Q6IPU0	FALSE	0	-1.21896	-0.0503745	-0.634669	0.0641981	0.0377853	-2.68522	FALSE	FALSE	Stable	Stable
CENPQ	18.7764	18.9939	19.052	18.7215	18.7679	18.8802	Q7L2Z9	Q7L2Z9	CENPQ_HUMAN	CENPQ	Centromere protein Q	Q7L2Z9	FALSE	0	-0.361005	0.0592663	-0.150869	0.18035	0.128347	-1.77486	FALSE	FALSE	Stable	Stable
CENPS	20.3123	20.2277	20.1078	19.9306	19.8279	19.8657	Q8N2Z9	Q8N2Z9	CENPS_HUMAN	CENPS	Centromere protein S	Q8N2Z9	FALSE	0	-0.494941	-0.187466	-0.341203	0.00528849	0.00175375	-5.48653	FALSE	FALSE	Stable	Stable
CENPT	19.4958	19.5758	19.5885	19.4825	19.5206	19.5753	Q96BT3	Q96BT3	CENPT_HUMAN	CENPT	Centromere protein T	Q96BT3	FALSE	0	-0.134573	0.0801088	-0.0272322	0.617934	0.554589	-0.627164	FALSE	FALSE	Stable	Stable
CENPU	20.1806	20.122	20.2457	19.8959	20.0041	19.8974	Q71F23	Q71F23	CENPU_HUMAN	CENPU	Centromere protein U	Q71F23	FALSE	0	-0.375839	-0.124782	-0.250311	0.00799659	0.00295457	-4.92948	FALSE	FALSE	Stable	Stable
CENPV	17.9114	17.9126	17.9631	18.2677	18.514	18.1792	Q7Z7K6	Q7Z7K6	CENPV_HUMAN	CENPV	Centromere protein V	Q7Z7K6	FALSE	0	0.170634	0.61197	0.391302	0.0124403	0.00512568	4.38366	FALSE	FALSE	Stable	Stable
CENPX	20.5772	20.5459	20.476	20.2991	20.3397	20.1997	A8MT69	A8MT69	CENPX_HUMAN	CENPX	Centromere protein X	A8MT69	FALSE	0	-0.380113	-0.126959	-0.253536	0.00786488	0.00289172	-4.95163	FALSE	FALSE	Stable	Stable
CEP112	17.8693	18.0731	18.2111	18.0773	18.2846	18.2094	Q8N8E3	Q8N8E3	CE112_HUMAN	CEP112	Centrosomal protein of 112 kDa	Q8N8E3	FALSE	0	-0.110362	0.388882	0.13926	0.282186	0.219026	1.37914	FALSE	FALSE	Stable	Stable
CEP120	18.3479	18.1554	18.4428	18.4731	18.3792	18.4894	Q8N960	Q8N960	CE120_HUMAN	CEP120	Centrosomal protein of 120 kDa	Q8N960	FALSE	0	-0.0686653	0.33242	0.131877	0.214523	0.157225	1.62565	FALSE	FALSE	Stable	Stable
CEP128	17.5369	17.6019	17.7883	17.1312	17.1756	17.316	Q6ZU80	Q6ZU80	CE128_HUMAN	CEP128	Centrosomal protein of 128 kDa	Q6ZU80	FALSE	0	-0.640043	-0.229469	-0.434756	0.00635716	0.00220802	-5.23539	FALSE	FALSE	Stable	Stable
CEP131	20.3343	20.4282	20.3306	20.9199	20.8903	20.9134	Q9UPN4	Q9UPN4	CP131_HUMAN	CEP131	Centrosomal protein of 131 kDa	Q9UPN4	FALSE	0	0.445793	0.641228	0.543511	0.000162801	1.27351e-05	13.7499	TRUE	TRUE	Up	Up
CEP135	18.572	18.5649	18.4718	18.2872	17.9183	18.2731	Q66GS9	Q66GS9	CP135_HUMAN	CEP135	Centrosomal protein of 135 kDa	Q66GS9	FALSE	0	-0.64332	-0.109962	-0.376641	0.0276562	0.0138584	-3.49143	FALSE	FALSE	Stable	Stable
CEP152	17.1922	17.2636	17.2386	16.8837	16.8661	16.9157	O94986	O94986	CE152_HUMAN	CEP152	Centrosomal protein of 152 kDa	O94986	FALSE	0	-0.430319	-0.255614	-0.342966	0.000586763	8.78913e-05	-9.70598	FALSE	FALSE	Stable	Stable
CEP170	22.0873	22.1425	22.103	22.3367	22.4837	22.4421	Q5SW79	Q5SW79	CE170_HUMAN	CEP170	Centrosomal protein of 170 kDa	Q5SW79	FALSE	0	0.190964	0.428843	0.309904	0.00281996	0.000780073	6.44115	FALSE	FALSE	Stable	Stable
CEP170B	18.7598	18.6689	18.817	18.359	18.3938	18.2763	Q9Y4F5	Q9Y4F5	C170B_HUMAN	CEP170B	Centrosomal protein of 170 kDa protein B	Q9Y4F5	FALSE	0	-0.539392	-0.271678	-0.405535	0.0015607	0.00035506	-7.48946	FALSE	FALSE	Stable	Stable
CEP192	18.7581	18.7669	18.59	18.832	18.8718	18.7819	Q8TEP8	Q8TEP8	CE192_HUMAN	CEP192	Centrosomal protein of 192 kDa	Q8TEP8	FALSE	0	-0.0241413	0.271223	0.123541	0.128187	0.0860906	2.06798	FALSE	FALSE	Stable	Stable
CEP20	14.5466	16.3601	14.9601	14.9881	15.5704	14.4959	Q96NB1	Q96NB1	CEP20_HUMAN	CEP20	Centrosomal protein 20	Q96NB1	TRUE	1	-1.57184	1.03025	-0.270797	0.683309	0.626022	-0.514535	FALSE	FALSE	Stable	Stable
CEP250	19.4763	19.4716	19.5113	20.1607	20.2945	20.1992	Q9BV73	Q9BV73	CP250_HUMAN	CEP250	Centrosome-associated protein CEP250	Q9BV73	FALSE	0	0.621022	0.842459	0.73174	9.10915e-05	4.82146e-06	16.3381	TRUE	TRUE	Up	Up
CEP290	18.7408	18.8417	18.6454	19.4057	19.4156	19.2483	O15078	O15078	CE290_HUMAN	CEP290	Centrosomal protein of 290 kDa	O15078	FALSE	0	0.437909	0.789946	0.613928	0.000903042	0.000167234	8.6223	TRUE	TRUE	Up	Up
CEP350	19.12	19.1189	19.1708	19.1288	19.2115	19.2521	Q5VT06	Q5VT06	CE350_HUMAN	CEP350	Centrosome-associated protein 350	Q5VT06	FALSE	0	-0.0472837	0.169145	0.0609307	0.278564	0.215332	1.39192	FALSE	FALSE	Stable	Stable
CEP41	20.9407	20.778	20.8449	21.4564	21.4755	21.5499	Q9BYV8	Q9BYV8	CEP41_HUMAN	CEP41	Centrosomal protein of 41 kDa	Q9BYV8	FALSE	0	0.506015	0.772735	0.639375	0.000277487	2.9196e-05	11.8521	TRUE	TRUE	Up	Up
CEP43	20.9985	21.0859	21.114	21.4696	21.6794	21.5653	O95684	O95684	CEP43_HUMAN	CEP43	Centrosomal protein 43	O95684	FALSE	0	0.345201	0.665368	0.505284	0.00131322	0.000285643	7.80287	TRUE	TRUE	Up	Up
CEP44	20.4889	20.5589	20.4815	19.6954	19.9585	19.9465	Q9C0F1	Q9C0F1	CEP44_HUMAN	CEP44	Centrosomal protein of 44 kDa	Q9C0F1	FALSE	0	-0.839646	-0.446307	-0.642976	0.00115013	0.000236778	-8.08205	TRUE	TRUE	Down	Down
CEP55	21.809	21.8784	21.9543	21.3205	21.3427	21.3786	Q53EZ4	Q53EZ4	CEP55_HUMAN	CEP55	Centrosomal protein of 55 kDa	Q53EZ4	FALSE	0	-0.649755	-0.416885	-0.53332	0.000333437	3.76163e-05	-11.3232	TRUE	TRUE	Down	Down
CEP57	19.2434	19.2349	19.1858	19.1468	19.1831	19.0053	Q86XR8	Q86XR8	CEP57_HUMAN	CEP57	Centrosomal protein of 57 kDa	Q86XR8	FALSE	0	-0.246452	0.0272511	-0.1096	0.142149	0.0970606	-1.97982	FALSE	FALSE	Stable	Stable
CEP72	21.6797	21.3896	21.6835	21.5792	21.7719	21.8568	Q9P209	Q9P209	CEP72_HUMAN	CEP72	Centrosomal protein of 72 kDa	Q9P209	FALSE	0	-0.1198	0.423287	0.151743	0.281509	0.218355	1.38145	FALSE	FALSE	Stable	Stable
CEP76	21.1606	21.0381	21.0466	20.98	21.0388	20.9051	Q8TAP6	Q8TAP6	CEP76_HUMAN	CEP76	Centrosomal protein of 76 kDa	Q8TAP6	FALSE	0	-0.240737	0.0264777	-0.10713	0.14172	0.0967494	-1.98218	FALSE	FALSE	Stable	Stable
CEP78	20.2856	20.4055	20.2375	20.1764	20.2666	20.3102	Q5JTW2	Q5JTW2	CEP78_HUMAN	CEP78	Centrosomal protein of 78 kDa	Q5JTW2	FALSE	0	-0.207029	0.090051	-0.058489	0.439661	0.369451	-0.973408	FALSE	FALSE	Stable	Stable
CEP83	18.6028	18.4411	18.343	18.2437	18.2579	18.075	Q9Y592	Q9Y592	CEP83_HUMAN	CEP83	Centrosomal protein of 83 kDa	Q9Y592	FALSE	0	-0.479559	-0.0605543	-0.270056	0.0374063	0.0200207	-3.18662	FALSE	FALSE	Stable	Stable
CEP85	19.8549	19.8601	19.9881	20.2751	20.3559	20.3825	Q6P2H3	Q6P2H3	CEP85_HUMAN	CEP85	Centrosomal protein of 85 kDa	Q6P2H3	FALSE	0	0.305047	0.568515	0.436781	0.00108609	0.000219596	8.19653	FALSE	FALSE	Stable	Stable
CEP89	18.677	18.5381	18.8895	18.589	18.1855	18.5509	Q96ST8	Q96ST8	CEP89_HUMAN	CEP89	Centrosomal protein of 89 kDa	Q96ST8	FALSE	0	-0.605338	0.0858594	-0.259739	0.163796	0.114605	-1.85793	FALSE	FALSE	Stable	Stable
CEP97	22.0282	22.1106	22.1359	22.1147	22.0193	22.0141	Q8IW35	Q8IW35	CEP97_HUMAN	CEP97	Centrosomal protein of 97 kDa	Q8IW35	FALSE	0	-0.160127	0.0757022	-0.0422125	0.483075	0.411594	-0.884987	FALSE	FALSE	Stable	Stable
CEPT1	17.0446	17.0444	17.3212	17.1821	17.2376	17.3637	Q9Y6K0	Q9Y6K0	CEPT1_HUMAN	CEPT1	Choline/ethanolaminephosphotransferase 1	Q9Y6K0	FALSE	0	-0.106379	0.355114	0.124368	0.297465	0.233031	1.33241	FALSE	FALSE	Stable	Stable
CERCAM	19.2797	19.1199	19.2612	18.454	18.9166	18.9029	Q5T4B2	Q5T4B2	GT253_HUMAN	CERCAM	Inactive glycosyltransferase 25 family member 3	Q5T4B2	FALSE	0	-0.799695	-0.125166	-0.462431	0.0304965	0.0156469	-3.38954	FALSE	FALSE	Stable	Stable
CERS2	19.9119	19.8678	20.2224	20.4722	20.4696	20.5155	Q96G23	Q96G23	CERS2_HUMAN	CERS2	Ceramide synthase 2	Q96G23	FALSE	0	0.242771	0.727288	0.48503	0.00787908	0.00289796	4.94941	FALSE	FALSE	Stable	Stable
CERS5	18.6827	18.609	18.4529	18.8085	18.637	18.8991	Q8N5B7	Q8N5B7	CERS5_HUMAN	CERS5	Ceramide synthase 5	Q8N5B7	FALSE	0	-0.0223492	0.422363	0.200007	0.107451	0.069729	2.22362	FALSE	FALSE	Stable	Stable
CERS6	20.3794	20.4046	20.3454	20.6914	20.6816	20.6838	Q6ZMG9	Q6ZMG9	CERS6_HUMAN	CERS6	Ceramide synthase 6	Q6ZMG9	FALSE	0	0.230633	0.387612	0.309123	0.000581478	8.64167e-05	9.73605	FALSE	FALSE	Stable	Stable
CERT1	21.4236	21.4021	21.4327	21.3932	21.3823	21.3426	Q9Y5P4	Q9Y5P4	CERT_HUMAN	CERT1	Ceramide transfer protein	Q9Y5P4	FALSE	0	-0.125679	0.0321414	-0.0467689	0.257532	0.195247	-1.46517	FALSE	FALSE	Stable	Stable
CES2	17.2728	17.3274	17.3171	18.3235	18.3107	18.3025	O00748	O00748	EST2_HUMAN	CES2	Cocaine esterase	O00748	FALSE	0	0.927585	1.08534	1.00646	1.06232e-05	1.13551e-07	31.5425	TRUE	TRUE	Up	Up
CETN2	18.935	18.7973	18.9329	17.77	18.019	17.7261	P41208	P41208	CETN2_HUMAN	CETN2	Centrin-2	P41208	FALSE	0	-1.27142	-0.828719	-1.05007	0.000289618	3.09641e-05	-11.7273	TRUE	TRUE	Down	Down
CETN3	15.6644	14.6552	15.2466	15.2772	14.1721	14.6724	O15182	O15182	CETN3_HUMAN	CETN3	Centrin-3	O15182	FALSE	0	-1.37714	0.414158	-0.48149	0.298675	0.234093	-1.32897	FALSE	FALSE	Stable	Stable
CFAP20	23.2374	23.4288	23.2704	23.5189	23.4914	23.4753	Q9Y6A4	Q9Y6A4	CFA20_HUMAN	CFAP20	Cilia- and flagella-associated protein 20	Q9Y6A4	FALSE	0	0.0402607	0.325744	0.183002	0.0380456	0.020451	3.16935	FALSE	FALSE	Stable	Stable
CFAP298	21.1451	21.0455	21.0062	21.394	21.3223	21.2715	P57076	P57076	CF298_HUMAN	CFAP298	Cilia- and flagella-associated protein 298	P57076	FALSE	0	0.131406	0.395876	0.263641	0.00800002	0.00295687	4.92868	FALSE	FALSE	Stable	Stable
CFAP36	20.335	20.4579	20.4759	20.1997	20.2902	20.2043	Q96G28	Q96G28	CFA36_HUMAN	CFAP36	Cilia- and flagella-associated protein 36	Q96G28	FALSE	0	-0.321421	-0.0616525	-0.191537	0.0238299	0.0115697	-3.64552	FALSE	FALSE	Stable	Stable
CFAP410	19.8085	19.5358	19.6819	18.5871	18.6943	18.9323	O43822	O43822	CF410_HUMAN	CFAP410	Cilia- and flagella-associated protein 410	O43822	FALSE	0	-1.21214	-0.662959	-0.937549	0.000971011	0.000187575	-8.4406	TRUE	TRUE	Down	Down
CFAP47	16.9078	16.004	16.4774	17.1428	17.6241	17.1794	Q6ZTR5	Q6ZTR5	CFA47_HUMAN	CFAP47	Cilia- and flagella-associated protein 47	Q6ZTR5	TRUE	1	0.223324	1.48143	0.852378	0.0317053	0.0164141	3.34972	FALSE	FALSE	Stable	Stable
CFAP97	18.409	18.4157	18.3997	17.8098	17.9667	17.7644	Q9P2B7	Q9P2B7	CFA97_HUMAN	CFAP97	Cilia- and flagella-associated protein 97	Q9P2B7	FALSE	0	-0.70577	-0.416529	-0.561149	0.000611873	9.37476e-05	-9.59209	TRUE	TRUE	Down	Down
CFB	19.4863	19.3439	19.3449	18.481	18.449	18.2399	P00751	P00751	CFAB_HUMAN	CFB	Complement factor B	P00751	FALSE	0	-1.19833	-0.805157	-1.00174	0.000221489	2.07886e-05	-12.5971	TRUE	TRUE	Down	Down
CFDP1	21.4388	21.4322	21.5428	21.1603	21.2304	21.1627	Q9UEE9	Q9UEE9	CFDP1_HUMAN	CFDP1	Craniofacial development protein 1	Q9UEE9	FALSE	0	-0.398944	-0.174702	-0.286823	0.00302963	0.000857193	-6.32396	FALSE	FALSE	Stable	Stable
CFL1	27.9284	27.9392	27.9794	27.669	27.8253	27.9409	P23528	P23528;Q9Y281	COF1_HUMAN	CFL1	Cofilin-1	P23528	FALSE	0	-0.316826	0.0423204	-0.137253	0.157857	0.109778	-1.88949	FALSE	FALSE	Stable	Stable
CFL2	24.9026	24.93	24.9664	24.7709	24.7433	24.7841	Q9Y281	Q9Y281	COF2_HUMAN	CFL2	Cofilin-2	Q9Y281	FALSE	0	-0.250229	-0.083613	-0.166921	0.00785551	0.00288727	-4.95323	FALSE	FALSE	Stable	Stable
CFLAR	16.7956	16.5577	16.7114	16.227	16.0402	16.0838	O15519	O15519	CFLAR_HUMAN	CFLAR	CASP8 and FADD-like apoptosis regulator	O15519	TRUE	1	-0.768717	-0.373754	-0.571236	0.00186358	0.000453116	-7.15076	TRUE	TRUE	Down	Down
CGAS	20.3227	20.4441	20.4216	21.1783	20.9946	21.1237	Q8N884	Q8N884	CGAS_HUMAN	CGAS	Cyclic GMP-AMP synthase	Q8N884	FALSE	0	0.549874	0.855644	0.702759	0.000329595	3.68857e-05	11.3633	TRUE	TRUE	Up	Up
CGGBP1	23.1254	23.1092	23.224	22.724	22.7303	22.6845	Q9UFW8	Q9UFW8	CGBP1_HUMAN	CGGBP1	CGG triplet repeat-binding protein 1	Q9UFW8	FALSE	0	-0.545843	-0.334015	-0.439929	0.00047869	6.45445e-05	-10.2682	FALSE	FALSE	Stable	Stable
CGN	17.9456	18.1094	17.8597	17.8319	18.0524	17.7779	Q9P2M7	Q9P2M7	CING_HUMAN	CGN	Cingulin	Q9P2M7	FALSE	0	-0.32411	0.155788	-0.0841612	0.491742	0.420561	-0.867076	FALSE	FALSE	Stable	Stable
CHAC2	19.3937	19.5164	19.425	19.7094	19.6769	19.5682	Q8WUX2	Q8WUX2	CHAC2_HUMAN	CHAC2	Glutathione-specific gamma-glutamylcyclotransferase 2	Q8WUX2	FALSE	0	0.0709558	0.341965	0.20646	0.0212285	0.0100661	3.76658	FALSE	FALSE	Stable	Stable
CHAF1A	20.6934	20.8493	20.7299	20.688	20.5368	20.6693	Q13111	Q13111	CAF1A_HUMAN	CHAF1A	Chromatin assembly factor 1 subunit A	Q13111	FALSE	0	-0.280765	0.0284375	-0.126164	0.135963	0.092224	-2.01737	FALSE	FALSE	Stable	Stable
CHAF1B	22.135	22.2316	22.2575	21.975	22.0072	21.9461	Q13112	Q13112	CAF1B_HUMAN	CHAF1B	Chromatin assembly factor 1 subunit B	Q13112	FALSE	0	-0.341937	-0.121895	-0.231916	0.00646295	0.00225891	-5.21099	FALSE	FALSE	Stable	Stable
CHAMP1	21.5178	21.5909	21.6564	21.3812	21.4388	21.4271	Q96JM3	Q96JM3	CHAP1_HUMAN	CHAMP1	Chromosome alignment-maintaining phosphoprotein 1	Q96JM3	FALSE	0	-0.286623	-0.0587183	-0.172671	0.0216529	0.0103064	-3.74592	FALSE	FALSE	Stable	Stable
CHCHD1	20.5946	20.6512	20.6908	20.3382	21.0607	20.8453	Q96BP2	Q96BP2	CHCH1_HUMAN	CHCHD1	Coiled-coil-helix-coiled-coil-helix domain-containing protein 1	Q96BP2	FALSE	0	-0.347854	0.553006	0.102576	0.654528	0.59468	0.562969	FALSE	FALSE	Stable	Stable
CHCHD2	20.3219	20.0309	20.1025	19.8048	19.8815	19.7433	Q9Y6H1	Q9Y6H1;Q5T1J5	CHCH2_HUMAN	CHCHD2	Coiled-coil-helix-coiled-coil-helix domain-containing protein 2	Q9Y6H1	FALSE	0	-0.552154	-0.131655	-0.341905	0.0169322	0.00757593	-4.02006	FALSE	FALSE	Stable	Stable
CHCHD3	24.4194	24.3592	24.3932	24.3548	24.3929	24.2426	Q9NX63	Q9NX63	MIC19_HUMAN	CHCHD3	MICOS complex subunit MIC19	Q9NX63	FALSE	0	-0.182117	0.0612031	-0.0604569	0.334639	0.267108	-1.22846	FALSE	FALSE	Stable	Stable
CHCHD4	19.8895	19.7344	19.672	19.714	19.6896	19.5989	Q8N4Q1	Q8N4Q1	MIA40_HUMAN	CHCHD4	Mitochondrial intermembrane space import and assembly protein 40	Q8N4Q1	FALSE	0	-0.264664	0.0689524	-0.0978557	0.261679	0.1992	-1.45022	FALSE	FALSE	Stable	Stable
CHCHD5	19.8773	20.1141	20.0351	19.1039	19.312	18.9802	Q9BSY4	Q9BSY4	CHCH5_HUMAN	CHCHD5	Coiled-coil-helix-coiled-coil-helix domain-containing protein 5	Q9BSY4	FALSE	0	-1.13223	-0.621392	-0.876809	0.000949944	0.000182199	-8.48631	TRUE	TRUE	Down	Down
CHCHD6	20.9542	20.9794	21.0136	20.3271	20.5271	20.4459	Q9BRQ6	Q9BRQ6	MIC25_HUMAN	CHCHD6	MICOS complex subunit MIC25	Q9BRQ6	FALSE	0	-0.692032	-0.406	-0.549016	0.000634143	9.9389e-05	-9.48996	TRUE	TRUE	Down	Down
CHD1	21.0856	20.9452	20.9466	21.2624	21.3162	21.284	O14646	O14646	CHD1_HUMAN	CHD1	Chromodomain-helicase-DNA-binding protein 1	O14646	FALSE	0	0.172071	0.418058	0.295064	0.00387895	0.00118841	5.9306	FALSE	FALSE	Stable	Stable
CHD1L	21.8684	21.8008	21.8731	21.9012	21.9402	21.9211	Q86WJ1	Q86WJ1	CHD1L_HUMAN	CHD1L	Chromodomain-helicase-DNA-binding protein 1-like	Q86WJ1	FALSE	0	-0.0145132	0.161346	0.0734165	0.128798	0.0865507	2.06406	FALSE	FALSE	Stable	Stable
CHD2	19.7738	19.783	19.7507	19.1709	19.2779	19.3323	O14647	O14647	CHD2_HUMAN	CHD2	Chromodomain-helicase-DNA-binding protein 2	O14647	FALSE	0	-0.630437	-0.387095	-0.508766	0.000465419	6.22157e-05	-10.337	TRUE	TRUE	Down	Down
CHD3	20.6375	20.6615	20.6498	20.0047	20.0038	20.0387	Q12873	Q12873	CHD3_HUMAN	CHD3	Chromodomain-helicase-DNA-binding protein 3	Q12873	FALSE	0	-0.708975	-0.558766	-0.633871	4.15539e-05	1.20407e-06	-20.8641	TRUE	TRUE	Down	Down
CHD4	23.3971	23.4276	23.4512	23.4203	23.4189	23.4038	Q14839	Q14839	CHD4_HUMAN	CHD4	Chromodomain-helicase-DNA-binding protein 4	Q14839	FALSE	0	-0.0886323	0.0667422	-0.010945	0.785316	0.740007	-0.348283	FALSE	FALSE	Stable	Stable
CHD6	18.8608	18.8281	18.8884	19.052	18.7265	18.9497	Q8TD26	Q8TD26	CHD6_HUMAN	CHD6	Chromodomain-helicase-DNA-binding protein 6	Q8TD26	FALSE	0	-0.162755	0.263315	0.0502799	0.642429	0.581702	0.583456	FALSE	FALSE	Stable	Stable
CHD8	21.8231	21.7022	21.8155	21.8856	21.8775	21.9067	Q9HCK8	Q9HCK8	CHD8_HUMAN	CHD8	Chromodomain-helicase-DNA-binding protein 8	Q9HCK8	FALSE	0	0.00159332	0.217786	0.10969	0.078182	0.0476442	2.50853	FALSE	FALSE	Stable	Stable
CHD9	16.7933	17.731	17.648	17.7797	17.8857	17.6512	Q3L8U1	Q3L8U1	CHD9_HUMAN	CHD9	Chromodomain-helicase-DNA-binding protein 9	Q3L8U1	FALSE	0	-0.255492	1.01843	0.38147	0.252895	0.191267	1.48051	FALSE	FALSE	Stable	Stable
CHEK1	20.6095	20.6903	20.6875	20.529	20.5198	20.4893	O14757	O14757	CHK1_HUMAN	CHEK1	Serine/threonine-protein kinase Chk1	O14757	FALSE	0	-0.241696	-0.0576923	-0.149694	0.0169068	0.00755745	-4.02228	FALSE	FALSE	Stable	Stable
CHEK2	21.332	21.3603	21.3113	20.7434	20.6882	20.8143	O96017	O96017	CHK2_HUMAN	CHEK2	Serine/threonine-protein kinase Chk2	O96017	FALSE	0	-0.692581	-0.479194	-0.585887	0.000170271	1.36831e-05	-13.575	TRUE	TRUE	Down	Down
CHERP	22.1732	22.0272	22.1413	22.1115	22.0908	22.0356	Q8IWX8	Q8IWX8	CHERP_HUMAN	CHERP	Calcium homeostasis endoplasmic reticulum protein	Q8IWX8	FALSE	0	-0.158675	0.0894499	-0.0346124	0.583871	0.517203	-0.689693	FALSE	FALSE	Stable	Stable
CHFR	18.0191	17.9069	17.829	18.3539	18.2548	18.391	Q96EP1	Q96EP1	CHFR_HUMAN	CHFR	E3 ubiquitin-protein ligase CHFR	Q96EP1	FALSE	0	0.257301	0.572454	0.414877	0.00271037	0.000739287	6.50867	FALSE	FALSE	Stable	Stable
CHID1	20.0316	20.026	20.1192	20.4064	20.4263	20.3951	Q9BWS9	Q9BWS9	CHID1_HUMAN	CHID1	Chitinase domain-containing protein 1	Q9BWS9	FALSE	0	0.25498	0.445686	0.350333	0.000748027	0.000126196	9.08262	FALSE	FALSE	Stable	Stable
CHKA	19.515	19.315	19.4431	19.6158	19.5956	19.7507	P35790	P35790	CHKA_HUMAN	CHKA	Choline kinase alpha	P35790	FALSE	0	0.058069	0.401352	0.22971	0.0330396	0.0172538	3.30843	FALSE	FALSE	Stable	Stable
CHM	18.7032	19.011	18.8204	18.8655	18.7756	18.8616	P24386	P24386	RAE1_HUMAN	CHM	Rab proteins geranylgeranyltransferase component A 1	P24386	FALSE	0	-0.217181	0.195928	-0.0106262	0.920673	0.903125	-0.127177	FALSE	FALSE	Stable	Stable
CHML	20.4757	20.3516	20.4192	20.4394	20.4134	20.3645	P26374	P26374	RAE2_HUMAN	CHML	Rab proteins geranylgeranyltransferase component A 2	P26374	FALSE	0	-0.121029	0.101616	-0.00970632	0.866729	0.836775	-0.215544	FALSE	FALSE	Stable	Stable
CHMP1A	23.1424	23.1381	23.0201	23.6108	23.6373	23.5103	Q9HD42	Q9HD42	CHM1A_HUMAN	CHMP1A	Charged multivesicular body protein 1a	Q9HD42	FALSE	0	0.351631	0.620317	0.485974	0.000791461	0.000137295	8.94258	FALSE	FALSE	Stable	Stable
CHMP2A	22.1492	22.1299	21.8903	21.5638	21.511	21.4499	O43633	O43633	CHM2A_HUMAN	CHMP2A	Charged multivesicular body protein 2a	O43633	FALSE	0	-0.745488	-0.350962	-0.548225	0.00217736	0.000558571	-6.87032	TRUE	TRUE	Down	Down
CHMP2B	22.0428	22.1755	22.0367	21.8248	21.8975	21.8165	Q9UQN3	Q9UQN3	CHM2B_HUMAN	CHMP2B	Charged multivesicular body protein 2b	Q9UQN3	FALSE	0	-0.366772	-0.110733	-0.238752	0.0103081	0.00405686	-4.61036	FALSE	FALSE	Stable	Stable
CHMP3	21.3367	21.4263	21.564	20.9708	21.2038	21.0582	Q9Y3E7	Q9Y3E7	CHMP3_HUMAN	CHMP3	Charged multivesicular body protein 3	Q9Y3E7	FALSE	0	-0.572121	-0.157248	-0.364685	0.0128314	0.00533215	-4.34607	FALSE	FALSE	Stable	Stable
CHMP4A	20.7555	20.7723	20.8168	20.7511	20.8824	21.0621	Q9BY43	Q9BY43	CHM4A_HUMAN	CHMP4A	Charged multivesicular body protein 4a	Q9BY43	FALSE	0	-0.0849315	0.318929	0.116999	0.266576	0.204026	1.43233	FALSE	FALSE	Stable	Stable
CHMP4B	24.7546	24.8481	24.8528	24.8037	24.9229	24.9252	Q9H444	Q9H444	CHM4B_HUMAN	CHMP4B	Charged multivesicular body protein 4b	Q9H444	FALSE	0	-0.0612899	0.192148	0.0654291	0.316698	0.250871	1.27642	FALSE	FALSE	Stable	Stable
CHMP7	21.702	21.7299	21.7193	21.7358	21.7835	21.7305	Q8WUX9	Q8WUX9	CHMP7_HUMAN	CHMP7	Charged multivesicular body protein 7	Q8WUX9	FALSE	0	-0.0469148	0.112605	0.0328452	0.419552	0.349528	1.01801	FALSE	FALSE	Stable	Stable
CHN1	20.3385	20.2306	20.2163	20.0491	20.1241	20.1054	P15882	P15882	CHIN_HUMAN	CHN1	N-chimaerin	P15882	FALSE	0	-0.284483	-0.0534283	-0.168956	0.0245365	0.0119823	-3.61536	FALSE	FALSE	Stable	Stable
CHORDC1	23.206	23.1363	23.1087	23.922	24.0449	23.9486	Q9UHD1	Q9UHD1	CHRD1_HUMAN	CHORDC1	Cysteine and histidine-rich domain-containing protein 1	Q9UHD1	FALSE	0	0.701615	0.941284	0.821449	7.98276e-05	3.92174e-06	16.9458	TRUE	TRUE	Up	Up
CHP1	22.1588	22.379	22.4311	22.361	22.3926	22.4072	Q99653	Q99653	CHP1_HUMAN	CHP1	Calcineurin B homologous protein 1	Q99653	FALSE	0	-0.123738	0.251746	0.0640039	0.503817	0.432964	0.842769	FALSE	FALSE	Stable	Stable
CHPF2	20.7363	20.7407	20.7064	20.9345	20.8256	20.9198	Q9P2E5	Q9P2E5	CHPF2_HUMAN	CHPF2	Chondroitin sulfate glucuronyltransferase	Q9P2E5	FALSE	0	0.0640062	0.267065	0.165536	0.0167925	0.00748902	4.03054	FALSE	FALSE	Stable	Stable
CHPT1	18.4734	18.2405	18.1222	18.5821	18.4762	18.6406	Q8WUD6	Q8WUD6	CHPT1_HUMAN	CHPT1	Cholinephosphotransferase 1	Q8WUD6	FALSE	0	0.0428846	0.532359	0.287622	0.0502283	0.0284681	2.90527	FALSE	FALSE	Stable	Stable
CHRAC1	19.175	19.3917	19.6388	19.3346	19.1487	19.2911	Q9NRG0	Q9NRG0	CHRC1_HUMAN	CHRAC1	Chromatin accessibility complex protein 1	Q9NRG0	FALSE	0	-0.451084	0.163606	-0.143739	0.362461	0.29333	-1.15615	FALSE	FALSE	Stable	Stable
CHST12	16.4552	16.7618	17.1706	17.0619	17.2566	17.0355	Q9NRB3	Q9NRB3	CHSTC_HUMAN	CHST12	Carbohydrate sulfotransferase 12	Q9NRB3	FALSE	0	-0.1337	0.778023	0.322162	0.186506	0.133304	1.74705	FALSE	FALSE	Stable	Stable
CHST14	21.1099	21.1535	21.1841	21.0939	21.1641	21.1299	Q8NCH0	Q8NCH0	CHSTE_HUMAN	CHST14	Carbohydrate sulfotransferase 14	Q8NCH0	FALSE	0	-0.112504	0.0728093	-0.0198473	0.673939	0.616223	-0.529528	FALSE	FALSE	Stable	Stable
CHST3	19.6362	19.4583	19.6242	19.8649	19.9263	19.81	Q7LGC8	Q7LGC8	CHST3_HUMAN	CHST3	Carbohydrate sulfotransferase 3	Q7LGC8	FALSE	0	0.140306	0.447978	0.294142	0.00934488	0.00360798	4.72676	FALSE	FALSE	Stable	Stable
CHSY1	19.1572	19.0858	19.0892	18.7897	18.7108	18.7562	Q86X52	Q86X52	CHSS1_HUMAN	CHSY1	Chondroitin sulfate synthase 1	Q86X52	FALSE	0	-0.455388	-0.261622	-0.358505	0.000729019	0.000121394	-9.14773	FALSE	FALSE	Stable	Stable
CHTF18	21.3989	21.5296	21.4246	21.0917	21.1431	21.013	Q8WVB6	Q8WVB6	CTF18_HUMAN	CHTF18	Chromosome transmission fidelity protein 18 homolog	Q8WVB6	FALSE	0	-0.501588	-0.235264	-0.368426	0.0022198	0.000571745	-6.83964	FALSE	FALSE	Stable	Stable
CHTOP	21.1882	21.3529	21.2684	20.8289	21.0337	20.999	Q9Y3Y2	Q9Y3Y2	CHTOP_HUMAN	CHTOP	Chromatin target of PRMT1 protein	Q9Y3Y2	FALSE	0	-0.493434	-0.138515	-0.315974	0.0122325	0.00503004	-4.40166	FALSE	FALSE	Stable	Stable
CHUK	20.5772	20.3666	20.5441	20.8044	20.8167	20.7719	O15111	O15111	IKKA_HUMAN	CHUK	Inhibitor of nuclear factor kappa-B kinase subunit alpha	O15111	FALSE	0	0.147501	0.455916	0.301708	0.00858611	0.00323541	4.83665	FALSE	FALSE	Stable	Stable
CHURC1	20.3447	20.244	20.2176	20.298	20.2578	19.8883	Q8WUH1	Q8WUH1	CHUR_HUMAN	CHURC1	Protein Churchill	Q8WUH1	FALSE	0	-0.409554	0.168172	-0.120691	0.413219	0.343083	-1.03287	FALSE	FALSE	Stable	Stable
CIAO1	20.8621	20.6999	20.8727	20.8015	20.7738	20.948	O76071	O76071	CIAO1_HUMAN	CIAO1	Probable cytosolic iron-sulfur protein assembly protein CIAO1	O76071	FALSE	0	-0.145268	0.204321	0.0295267	0.742528	0.691369	0.417591	FALSE	FALSE	Stable	Stable
CIAO2A	20.0442	20.0338	20.2609	19.9697	19.9852	19.9831	Q9H5X1	Q9H5X1	CIA2A_HUMAN	CIAO2A	Cytosolic iron-sulfur assembly component 2A	Q9H5X1	FALSE	0	-0.301752	0.034397	-0.133677	0.144355	0.098883	-1.96617	FALSE	FALSE	Stable	Stable
CIAO3	21.377	21.3976	21.3236	21.3832	21.3705	21.3502	Q9H6Q4	Q9H6Q4;Q9UHQ1	CIAO3_HUMAN	CIAO3	Cytosolic iron-sulfur assembly component 3	Q9H6Q4	FALSE	0	-0.0837584	0.0875362	0.00188888	0.965412	0.958363	0.05452	FALSE	FALSE	Stable	Stable
CIAPIN1	23.6922	23.7303	23.7625	24.0274	24.0738	24.1173	Q6FI81	Q6FI81	CPIN1_HUMAN	CIAPIN1	Anamorsin	Q6FI81	FALSE	0	0.247093	0.441877	0.344485	0.000859929	0.000155042	8.744	FALSE	FALSE	Stable	Stable
CIBAR1	17.5157	17.6333	17.1821	17.8664	18.0854	18.0623	A1XBS5	A1XBS5	CBAR1_HUMAN	CIBAR1	CBY1-interacting BAR domain-containing protein 1	A1XBS5	FALSE	0	0.240237	0.881774	0.561005	0.0130703	0.00546041	4.32353	FALSE	FALSE	Up	Stable
CIC	20.0294	19.9614	19.8607	19.2146	19.5834	19.3522	Q96RK0	Q96RK0	CIC_HUMAN	CIC	Protein capicua homolog	Q96RK0	FALSE	0	-0.820514	-0.31368	-0.567097	0.00511817	0.00168343	-5.53204	TRUE	TRUE	Down	Down
CINP	17.7558	17.3873	17.8406	17.4749	17.5519	17.5799	Q9BW66	Q9BW66	CINP_HUMAN	CINP	Cyclin-dependent kinase 2-interacting protein	Q9BW66	FALSE	0	-0.42778	0.176358	-0.125711	0.415012	0.344837	-1.0288	FALSE	FALSE	Stable	Stable
CIP2A	22.1819	22.1462	22.1996	22.2498	22.2316	22.2505	Q8TCG1	Q8TCG1	CIP2A_HUMAN	CIP2A	Protein CIP2A	Q8TCG1	FALSE	0	-0.00994369	0.146115	0.0680857	0.115788	0.0762929	2.15706	FALSE	FALSE	Stable	Stable
CIR1	20.3209	20.3899	20.2996	20.0108	20.0587	19.9026	Q86X95	Q86X95	CIR1_HUMAN	CIR1	Corepressor interacting with RBPJ 1	Q86X95	FALSE	0	-0.476807	-0.215404	-0.346106	0.00264858	0.000717658	-6.54624	FALSE	FALSE	Stable	Stable
CIRBP	21.2395	21.2039	21.3198	21.1972	21.3021	21.0922	Q14011	Q14011	CIRBP_HUMAN	CIRBP	Cold-inducible RNA-binding protein	Q14011	FALSE	0	-0.216817	0.102308	-0.0572548	0.482087	0.410573	-0.887044	FALSE	FALSE	Stable	Stable
CISD1	20.461	20.6496	20.2431	20.5998	20.5269	20.554	Q9NZ45	Q9NZ45	CISD1_HUMAN	CISD1	CDGSH iron-sulfur domain-containing protein 1	Q9NZ45	FALSE	0	-0.146666	0.364656	0.108995	0.404126	0.334126	1.05392	FALSE	FALSE	Stable	Stable
CISD2	22.7659	22.6184	22.7752	22.6134	22.4787	22.6074	Q8N5K1	Q8N5K1	CISD2_HUMAN	CISD2	CDGSH iron-sulfur domain-containing protein 2	Q8N5K1	FALSE	0	-0.308275	0.00167586	-0.153299	0.0837885	0.0518068	-2.44536	FALSE	FALSE	Stable	Stable
CIT	21.8147	21.8744	21.8106	21.8971	21.9493	21.952	O14578	O14578	CTRO_HUMAN	CIT	Citron Rho-interacting kinase	O14578	FALSE	0	0.00996224	0.189239	0.0996004	0.0599122	0.0348825	2.74683	FALSE	FALSE	Stable	Stable
CIZ1	20.0879	20.1927	20.2098	20.371	20.3669	20.2947	Q9ULV3	Q9ULV3	CIZ1_HUMAN	CIZ1	Cip1-interacting zinc finger protein	Q9ULV3	FALSE	0	0.0639361	0.29758	0.180758	0.0200987	0.00941908	3.82505	FALSE	FALSE	Stable	Stable
CKAP2	21.3152	21.4106	21.3248	21.0696	21.1173	21.2338	Q8WWK9	Q8WWK9	CKAP2_HUMAN	CKAP2	Cytoskeleton-associated protein 2	Q8WWK9	FALSE	0	-0.347361	-0.0725458	-0.209953	0.0210632	0.00994434	-3.77725	FALSE	FALSE	Stable	Stable
CKAP2L	20.3832	20.5033	20.2485	19.7995	19.928	19.912	Q8IYA6	Q8IYA6	CKP2L_HUMAN	CKAP2L	Cytoskeleton-associated protein 2-like	Q8IYA6	FALSE	0	-0.685122	-0.311956	-0.498539	0.00255156	0.000685127	-6.60529	FALSE	FALSE	Stable	Stable
CKAP4	25.5806	25.5923	25.6157	25.634	25.6582	25.6291	Q07065	Q07065	CKAP4_HUMAN	CKAP4	Cytoskeleton-associated protein 4	Q07065	FALSE	0	-0.0310606	0.119548	0.0442437	0.261213	0.198609	1.45243	FALSE	FALSE	Stable	Stable
CKAP5	23.5611	23.5796	23.5519	23.757	23.726	23.7366	Q14008	Q14008	CKAP5_HUMAN	CKAP5	Cytoskeleton-associated protein 5	Q14008	FALSE	0	0.101418	0.249872	0.175645	0.00409993	0.00127354	5.84977	FALSE	FALSE	Stable	Stable
CKB	22.8974	22.9607	22.8794	21.9159	21.9937	21.9668	P12277	P12277	KCRB_HUMAN	CKB	Creatine kinase B-type	P12277	FALSE	0	-1.05198	-0.855379	-0.953677	2.64056e-05	5.44095e-07	-23.9838	TRUE	TRUE	Down	Down
CKLF	20.5656	20.8251	20.6294	21.1007	21.2458	21.2299	Q9UBR5	Q9UBR5	CKLF_HUMAN	CKLF	Chemokine-like factor	Q9UBR5	FALSE	0	0.319448	0.71809	0.518769	0.00283159	0.000784513	6.43405	TRUE	TRUE	Up	Up
CKS1B	21.0685	21.3877	21.3616	21.4732	21.7001	21.4598	P61024	P61024	CKS1_HUMAN	CKS1B	Cyclin-dependent kinases regulatory subunit 1	P61024	FALSE	0	-0.0023437	0.545864	0.27176	0.0832394	0.051423	2.45095	FALSE	FALSE	Stable	Stable
CKS2	22.2288	22.0817	22.2474	22.0044	22.3307	22.1978	P33552	P33552	CKS2_HUMAN	CKS2	Cyclin-dependent kinases regulatory subunit 2	P33552	FALSE	0	-0.24209	0.225391	-0.00834969	0.945407	0.932623	-0.0883081	FALSE	FALSE	Stable	Stable
CLASP1	22.4465	22.4416	22.4047	21.7742	21.7734	21.6934	Q7Z460	Q7Z460	CLAP1_HUMAN	CLASP1	CLIP-associating protein 1	Q7Z460	FALSE	0	-0.777008	-0.590869	-0.683939	6.37666e-05	2.64428e-06	-18.1667	TRUE	TRUE	Down	Down
CLASP2	21.1676	21.2636	21.1915	21.2316	21.157	21.1805	O75122	O75122	CLAP2_HUMAN	CLASP2	CLIP-associating protein 2	O75122	FALSE	0	-0.120139	0.0844822	-0.0178283	0.734502	0.682288	-0.430777	FALSE	FALSE	Stable	Stable
CLCC1	21.1988	21.393	21.1898	21.5745	21.5461	21.473	Q96S66	Q96S66	CLCC1_HUMAN	CLCC1	Chloride channel CLIC-like protein 1	Q96S66	FALSE	0	0.105053	0.436226	0.270639	0.0166491	0.00740794	4.04045	FALSE	FALSE	Stable	Stable
CLCN3	17.7998	16.0785	17.5984	17.1817	16.7154	17.2311	P51790	P51790	CLCN3_HUMAN	CLCN3	H(+)/Cl(-) exchange transporter 3	P51790	TRUE	1	-1.28787	1.05548	-0.116194	0.84895	0.814839	-0.245155	FALSE	FALSE	Stable	Stable
CLCN6	17.2005	17.4001	17.6371	17.5634	17.7576	17.7377	P51797	P51797	CLCN6_HUMAN	CLCN6	H(+)/Cl(-) exchange transporter 6	P51797	FALSE	0	-0.0240774	0.571405	0.273664	0.101807	0.0653126	2.27218	FALSE	FALSE	Stable	Stable
CLCN7	20.777	20.7514	20.8385	20.6885	20.749	20.7309	P51798	P51798	CLCN7_HUMAN	CLCN7	H(+)/Cl(-) exchange transporter 7	P51798	FALSE	0	-0.161468	0.0290983	-0.0661847	0.19304	0.138845	-1.71714	FALSE	FALSE	Stable	Stable
CLDN11	21.6583	21.6551	21.6977	22.6369	22.569	22.6251	O75508	O75508	CLD11_HUMAN	CLDN11	Claudin-11	O75508	FALSE	0	0.853188	1.02677	0.939977	1.7601e-05	2.90139e-07	26.7741	TRUE	TRUE	Up	Up
CLDND1	16.8032	17.0703	16.6841	17.4217	17.0992	16.2566	Q9NY35	Q9NY35	CLDN1_HUMAN	CLDND1	Claudin domain-containing protein 1	Q9NY35	FALSE	0	-0.683304	0.829909	0.0733027	0.851811	0.819011	0.239505	FALSE	FALSE	Stable	Stable
CLEC16A	17.9428	17.8087	17.8058	18.0597	17.9473	17.9072	Q2KHT3	Q2KHT3	CL16A_HUMAN	CLEC16A	Protein CLEC16A	Q2KHT3	FALSE	0	-0.0306142	0.268595	0.11899	0.144355	0.0988768	1.96621	FALSE	FALSE	Stable	Stable
CLGN	20.4238	20.5913	20.5892	21.8356	21.755	21.8522	O14967	O14967	CLGN_HUMAN	CLGN	Calmegin	O14967	FALSE	0	1.13195	1.42705	1.2795	3.79753e-05	1.03191e-06	21.4372	TRUE	TRUE	Up	Up
CLIC1	26.1024	26.3278	26.2271	26.6099	26.5752	26.5818	O00299	O00299	CLIC1_HUMAN	CLIC1	Chloride intracellular channel protein 1	O00299	FALSE	0	0.216904	0.522805	0.369854	0.00376769	0.00114171	5.97783	FALSE	FALSE	Stable	Stable
CLIC4	24.5504	24.7103	24.6903	24.5412	24.5417	24.6184	Q9Y696	Q9Y696	CLIC4_HUMAN	CLIC4	Chloride intracellular channel protein 4	Q9Y696	FALSE	0	-0.218878	0.052451	-0.0832136	0.242808	0.18227	-1.51632	FALSE	FALSE	Stable	Stable
CLINT1	23.4543	23.6308	23.5699	23.7285	23.746	23.7569	Q14677	Q14677	EPN4_HUMAN	CLINT1	Clathrin interactor 1	Q14677	FALSE	0	0.0635062	0.320722	0.192114	0.0227865	0.0109545	3.6928	FALSE	FALSE	Stable	Stable
CLIP1	21.9736	22.0855	22.0483	21.9165	22.0316	22.0296	P30622	P30622	CLIP1_HUMAN	CLIP1	CAP-Gly domain-containing linker protein 1	P30622	FALSE	0	-0.168201	0.0817262	-0.0432373	0.497505	0.426516	-0.855342	FALSE	FALSE	Stable	Stable
CLIP2	21.0654	21.1233	21.1698	21.5012	21.5922	21.5416	Q9UDT6	Q9UDT6	CLIP2_HUMAN	CLIP2	CAP-Gly domain-containing linker protein 2	Q9UDT6	FALSE	0	0.317373	0.533591	0.425482	0.000582658	8.67421e-05	9.72937	FALSE	FALSE	Stable	Stable
CLIP3	17.5021	18.5963	18.7756	18.8334	18.7362	18.7245	Q96DZ5	Q96DZ5	CLIP3_HUMAN	CLIP3	CAP-Gly domain-containing linker protein 3	Q96DZ5	FALSE	0	-0.352745	1.29942	0.473337	0.271278	0.208393	1.41648	FALSE	FALSE	Stable	Stable
CLIP4	18.3971	18.3655	18.2314	18.1438	18.2783	18.2201	Q8N3C7	Q8N3C7	CLIP4_HUMAN	CLIP4	CAP-Gly domain-containing linker protein 4	Q8N3C7	FALSE	0	-0.266542	0.0319282	-0.117307	0.148387	0.102027	-1.9432	FALSE	FALSE	Stable	Stable
CLK2	19.2812	19.1267	19.2528	18.5014	18.6274	18.7397	P49760	P49760	CLK2_HUMAN	CLK2	Dual specificity protein kinase CLK2	P49760	FALSE	0	-0.783298	-0.411497	-0.597397	0.0012291	0.00025959	-7.94413	TRUE	TRUE	Down	Down
CLK3	19.3439	19.1226	19.2344	19.2305	19.3731	19.4114	P49761	P49761	CLK3_HUMAN	CLK3	Dual specificity protein kinase CLK3	P49761	FALSE	0	-0.0825897	0.2919	0.104655	0.281466	0.218281	1.3817	FALSE	FALSE	Stable	Stable
CLMN	18.876	19.0942	19.0354	19.361	19.3146	19.2601	Q96JQ2	Q96JQ2	CLMN_HUMAN	CLMN	Calmin	Q96JQ2	FALSE	0	0.147164	0.472885	0.310025	0.00951004	0.003684	4.70593	FALSE	FALSE	Stable	Stable
CLN5	20.6402	20.3189	20.5404	19.8209	19.8141	19.8556	O75503	O75503	CLN5_HUMAN	CLN5	Ceroid-lipofuscinosis neuronal protein 5	O75503	FALSE	0	-0.878979	-0.460224	-0.669602	0.00124671	0.000266361	-7.90589	TRUE	TRUE	Down	Down
CLN6	18.173	17.6685	18.7776	18.6265	17.5121	17.8343	Q9NWW5	Q9NWW5	CLN6_HUMAN	CLN6	Ceroid-lipofuscinosis neuronal protein 6	Q9NWW5	FALSE	0	-1.1676	0.736805	-0.215397	0.656704	0.59708	-0.559209	FALSE	FALSE	Stable	Stable
CLNS1A	23.0528	22.7357	23.0294	23.1754	23.0575	22.9907	P54105	P54105	ICLN_HUMAN	CLNS1A	Methylosome subunit pICln	P54105	FALSE	0	-0.112643	0.383141	0.135249	0.291861	0.228039	1.34877	FALSE	FALSE	Stable	Stable
CLOCK	18.0768	17.8569	18.064	18.1037	17.7817	17.9169	O15516	O15516	CLOCK_HUMAN	CLOCK	Circadian locomoter output cycles protein kaput	O15516	FALSE	0	-0.316954	0.186766	-0.0650941	0.611623	0.547432	-0.63892	FALSE	FALSE	Stable	Stable
CLP1	20.2645	20.1812	20.3069	20.4288	20.395	20.371	Q92989	Q92989	CLP1_HUMAN	CLP1	Polyribonucleotide 5'-hydroxyl-kinase Clp1	Q92989	FALSE	0	0.0385181	0.256283	0.1474	0.0317988	0.0164757	3.34661	FALSE	FALSE	Stable	Stable
CLPB	21.5447	21.6046	21.573	21.6735	21.5787	21.5524	Q9H078	Q9H078	CLPB_HUMAN	CLPB	Caseinolytic peptidase B protein homolog	Q9H078	FALSE	0	-0.0815536	0.136445	0.0274455	0.620265	0.557467	0.622462	FALSE	FALSE	Stable	Stable
CLPP	18.105	17.992	18.3577	17.7906	17.8313	17.8403	Q16740	Q16740	CLPP_HUMAN	CLPP	ATP-dependent Clp protease proteolytic subunit, mitochondrial	Q16740	FALSE	0	-0.566368	-0.0952856	-0.330827	0.0281723	0.0141787	-3.47214	FALSE	FALSE	Stable	Stable
CLPTM1	22.38	22.2761	22.3011	22.3931	22.3694	22.2751	O96005	O96005	CLPT1_HUMAN	CLPTM1	Putative lipid scramblase CLPTM1	O96005	FALSE	0	-0.0937883	0.147376	0.0267941	0.662649	0.603425	0.549312	FALSE	FALSE	Stable	Stable
CLPTM1L	21.4297	21.3902	21.509	22.2148	22.0644	22.0551	Q96KA5	Q96KA5	CLP1L_HUMAN	CLPTM1L	Lipid scramblase CLPTM1L	Q96KA5	FALSE	0	0.522084	0.814835	0.66846	0.000336335	3.8244e-05	11.2894	TRUE	TRUE	Up	Up
CLPX	22.1305	22.0983	22.1011	21.9509	21.9987	21.9661	O76031	O76031	CLPX_HUMAN	CLPX	ATP-dependent Clp protease ATP-binding subunit clpX-like, mitochondrial	O76031	FALSE	0	-0.216595	-0.0595125	-0.138054	0.0128376	0.00533674	-4.34525	FALSE	FALSE	Stable	Stable
CLSPN	20.8026	20.8085	20.8092	20.4731	20.6359	20.5633	Q9HAW4	Q9HAW4	CLSPN_HUMAN	CLSPN	Claspin	Q9HAW4	FALSE	0	-0.368923	-0.129703	-0.249313	0.00674186	0.00238591	-5.15276	FALSE	FALSE	Stable	Stable
CLSTN1	19.6158	19.7193	19.659	19.9831	20.0031	19.8928	O94985	O94985	CSTN1_HUMAN	CLSTN1	Calsyntenin-1	O94985	FALSE	0	0.178397	0.411551	0.294974	0.00315116	0.000906593	6.25511	FALSE	FALSE	Stable	Stable
CLTA	22.7007	22.73	22.8375	22.6782	22.9679	23.0001	P09496	P09496	CLCA_HUMAN	CLTA	Clathrin light chain A	P09496	FALSE	0	-0.112176	0.364137	0.125981	0.305834	0.240761	1.30769	FALSE	FALSE	Stable	Stable
CLTB	24.1141	24.2047	24.1666	24.1476	24.4661	24.4405	P09497	P09497	CLCB_HUMAN	CLTB	Clathrin light chain B	P09497	FALSE	0	-0.038718	0.417907	0.189595	0.130545	0.0878777	2.05286	FALSE	FALSE	Stable	Stable
CLTC	27.6244	27.589	27.6335	27.7847	27.7372	27.7845	Q00610	P53675;Q00610	CLH1_HUMAN	CLTC	Clathrin heavy chain 1	Q00610	FALSE	0	0.0712117	0.235142	0.153177	0.0102227	0.00401797	4.61985	FALSE	FALSE	Stable	Stable
CLTCL1	20.6298	20.4274	16.2746	20.4029	20.3667	20.4435	P53675	P53675	CLH2_HUMAN	CLTCL1	Clathrin heavy chain 2	P53675	TRUE	1	-1.63172	4.21918	1.29373	0.387767	0.317904	1.09324	FALSE	FALSE	Stable	Stable
CLU	20.0638	20.0738	20.0805	20.422	20.3351	20.3755	P10909	P10909	CLUS_HUMAN	CLU	Clusterin	P10909	FALSE	0	0.217361	0.392308	0.304834	0.000904589	0.000168007	8.61494	FALSE	FALSE	Stable	Stable
CLUAP1	18.6046	18.6317	18.6896	18.5848	18.4633	18.5676	Q96AJ1	Q96AJ1	CLUA1_HUMAN	CLUAP1	Clusterin-associated protein 1	Q96AJ1	FALSE	0	-0.220259	0.0135102	-0.103374	0.112196	0.0733286	-2.18635	FALSE	FALSE	Stable	Stable
CLUH	22.1032	22.0811	22.049	22.3605	22.3926	22.3419	O75153	O75153	CLU_HUMAN	CLUH	Clustered mitochondria protein homolog	O75153	FALSE	0	0.204453	0.370065	0.287259	0.000916417	0.000172181	8.57583	FALSE	FALSE	Stable	Stable
CMAS	21.1725	21.1343	21.1303	21.9062	21.9156	21.9573	Q8NFW8	Q8NFW8	NEUA_HUMAN	CMAS	N-acylneuraminate cytidylyltransferase	Q8NFW8	FALSE	0	0.698875	0.862492	0.780683	2.76232e-05	5.97913e-07	23.5907	TRUE	TRUE	Up	Up
CMBL	20.2317	20.0605	20.2645	21.3738	21.3249	21.2737	Q96DG6	Q96DG6	CMBL_HUMAN	CMBL	Carboxymethylenebutenolidase homolog	Q96DG6	FALSE	0	0.979202	1.29793	1.13856	6.96988e-05	3.10241e-06	17.6618	TRUE	TRUE	Up	Up
CMC1	18.5002	18.2977	18.7036	18.7758	18.5592	18.7795	Q7Z7K0	Q7Z7K0	COXM1_HUMAN	CMC1	COX assembly mitochondrial protein homolog	Q7Z7K0	FALSE	0	-0.0883788	0.497053	0.204337	0.191284	0.137237	1.7257	FALSE	FALSE	Stable	Stable
CMC2	21.835	21.911	21.9244	22.6657	22.8103	22.7299	Q9NRP2	Q9NRP2	COXM2_HUMAN	CMC2	COX assembly mitochondrial protein 2 homolog	Q9NRP2	FALSE	0	0.720273	0.970072	0.845173	8.40081e-05	4.21934e-06	16.7281	TRUE	TRUE	Up	Up
CMIP	18.2128	18.2532	18.5165	19.3704	19.3302	19.3358	Q8IY22	Q8IY22	CMIP_HUMAN	CMIP	C-Maf-inducing protein	Q8IY22	FALSE	0	0.80813	1.22775	1.01794	0.000266345	2.73272e-05	11.9939	TRUE	TRUE	Up	Up
CMPK1	23.3729	23.4865	23.4114	23.4699	23.5005	23.5213	P30085	P30085	KCY_HUMAN	CMPK1	UMP-CMP kinase	P30085	FALSE	0	-0.0290201	0.17632	0.0736499	0.180692	0.128614	1.77334	FALSE	FALSE	Stable	Stable
CMPK2	19.7321	16.2334	16.1258	20.3454	20.3851	20.4204	Q5EBM0	Q5EBM0	CMPK2_HUMAN	CMPK2	UMP-CMP kinase 2, mitochondrial	Q5EBM0	TRUE	2	0.577664	5.46211	3.01989	0.0426159	0.0235169	3.05682	FALSE	FALSE	Stable	Stable
CMSS1	20.8161	20.4569	20.4795	21.0874	21.1317	21.2662	Q9BQ75	Q9BQ75	CMS1_HUMAN	CMSS1	Protein CMSS1	Q9BQ75	FALSE	0	0.304822	0.850364	0.577593	0.0063592	0.00220955	5.23465	TRUE	TRUE	Up	Up
CMTM3	19.2671	19.075	19.1774	19.4455	19.498	19.5012	Q96MX0	Q96MX0	CKLF3_HUMAN	CMTM3	CKLF-like MARVEL transmembrane domain-containing protein 3	Q96MX0	FALSE	0	0.169333	0.447442	0.308387	0.00530174	0.00176019	5.48247	FALSE	FALSE	Stable	Stable
CMTM4	18.7545	18.9222	18.9227	18.507	18.7024	18.7034	Q8IZR5	Q8IZR5	CKLF4_HUMAN	CMTM4	CKLF-like MARVEL transmembrane domain-containing protein 4	Q8IZR5	FALSE	0	-0.419374	-0.0383785	-0.228876	0.0468081	0.0262222	-2.97013	FALSE	FALSE	Stable	Stable
CMTM6	21.22	21.2183	21.2644	21.3988	21.3376	21.3533	Q9NX76	Q9NX76	CKLF6_HUMAN	CMTM6	CKLF-like MARVEL transmembrane domain-containing protein 6	Q9NX76	FALSE	0	0.0436809	0.214279	0.12898	0.0218082	0.0104	3.73802	FALSE	FALSE	Stable	Stable
CMTR1	21.7189	21.6867	21.6986	22.4088	22.4468	22.4176	Q8N1G2	Q8N1G2	CMTR1_HUMAN	CMTR1	Cap-specific mRNA (nucleoside-2'-O-)-methyltransferase 1	Q8N1G2	FALSE	0	0.646763	0.799228	0.722995	2.7912e-05	6.19338e-07	23.4455	TRUE	TRUE	Up	Up
CNBP	23.9435	23.9313	24.0752	23.9688	23.9718	23.9841	P62633	P62633	CNBP_HUMAN	CNBP	CCHC-type zinc finger nucleic acid binding protein	P62633	FALSE	0	-0.126629	0.109865	-0.00838205	0.891343	0.866893	-0.175236	FALSE	FALSE	Stable	Stable
CNDP2	23.438	23.4472	23.45	22.7726	22.7225	22.646	Q96KP4	Q96KP4	CNDP2_HUMAN	CNDP2	Cytosolic non-specific dipeptidase	Q96KP4	FALSE	0	-0.834711	-0.627954	-0.731333	7.24356e-05	3.28089e-06	-17.4883	TRUE	TRUE	Down	Down
CNIH4	18.9026	18.7731	19.0891	19.5015	19.3891	19.2484	Q9P003	Q9P003	CNIH4_HUMAN	CNIH4	Protein cornichon homolog 4	Q9P003	FALSE	0	0.206348	0.709723	0.458036	0.0112995	0.00454726	4.49885	FALSE	FALSE	Stable	Stable
CNN2	24.541	24.5917	24.5013	24.0172	24.1083	24.0487	Q99439	Q99439	CNN2_HUMAN	CNN2	Calponin-2	Q99439	FALSE	0	-0.590562	-0.38261	-0.486586	0.000304346	3.33938e-05	-11.5689	FALSE	FALSE	Stable	Stable
CNN3	25.9561	25.9138	25.9603	25.8596	25.8762	25.9091	Q15417	Q15417	CNN3_HUMAN	CNN3	Calponin-3	Q15417	FALSE	0	-0.143668	0.020176	-0.0617459	0.162792	0.113776	-1.86325	FALSE	FALSE	Stable	Stable
CNNM2	17.1579	17.4638	17.4076	17.4551	17.7699	17.5888	Q9H8M5	Q9H8M5	CNNM2_HUMAN	CNNM2	Metal transporter CNNM2	Q9H8M5	FALSE	0	-0.0172828	0.540277	0.261497	0.096425	0.0613444	2.31883	FALSE	FALSE	Stable	Stable
CNNM3	20.6786	20.8863	20.7228	20.3312	20.2375	20.415	Q8NE01	Q8NE01	CNNM3_HUMAN	CNNM3	Metal transporter CNNM3	Q8NE01	FALSE	0	-0.616247	-0.253088	-0.434668	0.00392011	0.00120153	-5.91772	FALSE	FALSE	Stable	Stable
CNNM4	19.0567	19.1581	19.1565	19.3059	19.1863	19.2111	Q6P4Q7	Q6P4Q7	CNNM4_HUMAN	CNNM4	Metal transporter CNNM4	Q6P4Q7	FALSE	0	-0.0129992	0.234297	0.110649	0.108991	0.0708123	2.2122	FALSE	FALSE	Stable	Stable
CNOT1	23.5309	23.4899	23.5131	23.4459	23.444	23.4395	A5YKK6	A5YKK6	CNOT1_HUMAN	CNOT1	CCR4-NOT transcription complex subunit 1	A5YKK6	FALSE	0	-0.142238	0.00591886	-0.0681595	0.101511	0.0651029	-2.27457	FALSE	FALSE	Stable	Stable
CNOT10	22.4026	22.42	22.4794	22.6289	22.4455	22.5063	Q9H9A5	Q9H9A5	CNO10_HUMAN	CNOT10	CCR4-NOT transcription complex subunit 10	Q9H9A5	FALSE	0	-0.0468816	0.232629	0.0928736	0.210102	0.153606	1.64281	FALSE	FALSE	Stable	Stable
CNOT11	20.6388	20.5435	20.5816	20.5789	20.6197	20.5555	Q9UKZ1	Q9UKZ1	CNO11_HUMAN	CNOT11	CCR4-NOT transcription complex subunit 11	Q9UKZ1	FALSE	0	-0.101314	0.0948951	-0.00320962	0.949775	0.938277	-0.0808775	FALSE	FALSE	Stable	Stable
CNOT2	20.6182	20.7253	20.7889	20.5742	20.7038	20.6941	Q9NZN8	Q9NZN8	CNOT2_HUMAN	CNOT2	CCR4-NOT transcription complex subunit 2	Q9NZN8	FALSE	0	-0.204358	0.0975759	-0.0533908	0.488461	0.416938	-0.874278	FALSE	FALSE	Stable	Stable
CNOT3	21.5659	21.5074	21.5079	21.538	21.5854	21.5745	O75175	O75175	CNOT3_HUMAN	CNOT3	CCR4-NOT transcription complex subunit 3	O75175	FALSE	0	-0.0468445	0.12462	0.0388878	0.375843	0.306725	1.12133	FALSE	FALSE	Stable	Stable
CNOT4	18.9918	19.21	19.1235	19.2638	19.4352	19.3759	O95628	O95628	CNOT4_HUMAN	CNOT4	CCR4-NOT transcription complex subunit 4	O95628	FALSE	0	0.0690582	0.430688	0.249873	0.0296933	0.0151545	3.41625	FALSE	FALSE	Stable	Stable
CNOT6	20.9284	21.0218	20.7864	20.911	20.9623	20.7863	Q9ULM6	Q9ULM6	CNOT6_HUMAN	CNOT6	CCR4-NOT transcription complex subunit 6	Q9ULM6	FALSE	0	-0.216389	0.164977	-0.025706	0.794096	0.750735	-0.333263	FALSE	FALSE	Stable	Stable
CNOT6L	18.7248	18.9447	18.9322	19.3004	19.174	19.2891	Q96LI5	Q96LI5	CNO6L_HUMAN	CNOT6L	CCR4-NOT transcription complex subunit 6-like	Q96LI5	FALSE	0	0.204566	0.57	0.387283	0.00634283	0.00219899	5.23978	FALSE	FALSE	Stable	Stable
CNOT7	22.0546	22.0126	22.0054	21.8855	21.9206	21.9214	Q9UIV1	Q9UIV1	CNOT7_HUMAN	CNOT7	CCR4-NOT transcription complex subunit 7	Q9UIV1	FALSE	0	-0.195449	-0.0345904	-0.11502	0.0265004	0.0131598	-3.53527	FALSE	FALSE	Stable	Stable
CNOT8	19.4174	19.5068	19.4594	19.2877	19.377	19.1689	Q9UFF9	Q9UFF9	CNOT8_HUMAN	CNOT8	CCR4-NOT transcription complex subunit 8	Q9UFF9	FALSE	0	-0.335392	-0.0312167	-0.183304	0.0463219	0.025914	-2.9795	FALSE	FALSE	Stable	Stable
CNOT9	21.3428	21.2933	21.2482	21.2131	21.1271	21.1301	Q92600	Q92600	CNOT9_HUMAN	CNOT9	CCR4-NOT transcription complex subunit 9	Q92600	FALSE	0	-0.244832	-0.031107	-0.137969	0.0372348	0.019896	-3.1917	FALSE	FALSE	Stable	Stable
CNP	23.8643	23.7751	23.9281	24.0409	24.1371	24.1111	P09543	P09543	CN37_HUMAN	CNP	2',3'-cyclic-nucleotide 3'-phosphodiesterase	P09543	FALSE	0	0.111097	0.36993	0.240514	0.010451	0.00412387	4.59425	FALSE	FALSE	Stable	Stable
CNPY2	20.1322	20.1823	20.1227	20.5758	20.7097	20.7412	Q9Y2B0	Q9Y2B0	CNPY2_HUMAN	CNPY2	Protein canopy homolog 2	Q9Y2B0	FALSE	0	0.398548	0.661146	0.529847	0.000529091	7.56331e-05	9.97591	TRUE	TRUE	Up	Up
CNPY3	22.1846	22.0566	22.1698	21.7848	21.8704	21.9679	Q9BT09	Q9BT09	CNPY3_HUMAN	CNPY3	Protein canopy homolog 3	Q9BT09	FALSE	0	-0.416564	-0.108715	-0.26264	0.0142632	0.00610882	-4.2181	FALSE	FALSE	Stable	Stable
CNPY4	22.3412	22.3471	22.1727	21.8802	21.9384	21.89	Q8N129	Q8N129	CNPY4_HUMAN	CNPY4	Protein canopy homolog 4	Q8N129	FALSE	0	-0.526014	-0.242262	-0.384138	0.00242879	0.000639717	-6.69335	FALSE	FALSE	Stable	Stable
CNRIP1	21.5776	21.6134	21.4097	21.7737	21.7055	21.5207	Q96F85	Q96F85	CNRP1_HUMAN	CNRIP1	CB1 cannabinoid receptor-interacting protein 1	Q96F85	FALSE	0	-0.0811296	0.347214	0.133042	0.237748	0.177584	1.53565	FALSE	FALSE	Stable	Stable
CNST	17.9497	17.7128	17.4131	17.5042	17.5307	18.0318	Q6PJW8	Q6PJW8	CNST_HUMAN	CNST	Consortin	Q6PJW8	FALSE	0	-0.484915	0.478961	-0.00297733	0.991069	0.98833	-0.0152722	FALSE	FALSE	Stable	Stable
CNTLN	18.7617	18.7186	18.9688	18.9885	18.926	18.8138	Q9NXG0	Q9NXG0	CNTLN_HUMAN	CNTLN	Centlein	Q9NXG0	FALSE	0	-0.110107	0.296249	0.0930708	0.371493	0.302409	1.1324	FALSE	FALSE	Stable	Stable
CNTNAP1	22.6723	22.6126	22.6751	22.0889	22.0837	22.0658	P78357	P78357	CNTP1_HUMAN	CNTNAP1	Contactin-associated protein 1	P78357	FALSE	0	-0.656615	-0.491136	-0.573876	7.76367e-05	3.6692e-06	-17.1463	TRUE	TRUE	Down	Down
COA3	23.0635	23.2527	23.2136	23.3612	23.549	23.4701	Q9Y2R0	Q9Y2R0	COA3_HUMAN	COA3	Cytochrome c oxidase assembly factor 3 homolog, mitochondrial	Q9Y2R0	FALSE	0	0.105756	0.461182	0.283469	0.0181301	0.00824902	3.94322	FALSE	FALSE	Stable	Stable
COA4	18.7891	18.6573	18.7667	18.6383	19.2049	18.8149	Q9NYJ1	Q9NYJ1	COA4_HUMAN	COA4	Cytochrome c oxidase assembly factor 4 homolog, mitochondrial	Q9NYJ1	FALSE	0	-0.213385	0.510089	0.148352	0.42129	0.351356	1.01383	FALSE	FALSE	Stable	Stable
COA7	20.6265	20.4751	20.2445	20.5473	20.6558	20.6487	Q96BR5	Q96BR5	COA7_HUMAN	COA7	Cytochrome c oxidase assembly factor 7	Q96BR5	FALSE	0	-0.0813323	0.418483	0.168575	0.204302	0.148532	1.66755	FALSE	FALSE	Stable	Stable
COASY	22.0962	22.3113	22.1957	22.5079	22.4849	22.4308	Q13057	Q13057	COASY_HUMAN	COASY	Bifunctional coenzyme A synthase	Q13057	FALSE	0	0.120206	0.426745	0.273476	0.0121493	0.00498176	4.41089	FALSE	FALSE	Stable	Stable
COBLL1	17.3537	17.357	17.323	16.2256	15.9218	16.2031	Q53SF7	Q53SF7	COBL1_HUMAN	COBLL1	Cordon-bleu protein-like 1	Q53SF7	TRUE	2	-1.442	-1.01345	-1.22773	0.000147733	1.07795e-05	-14.1644	TRUE	TRUE	Down	Down
COG1	22.9233	22.9073	22.9208	23.1065	23.0153	23.0171	Q8WTW3	Q8WTW3	COG1_HUMAN	COG1	Conserved oligomeric Golgi complex subunit 1	Q8WTW3	FALSE	0	0.0352104	0.223171	0.129191	0.0302533	0.0154839	3.39827	FALSE	FALSE	Stable	Stable
COG2	20.3036	20.2601	20.3068	20.3876	20.3712	20.3439	Q14746	Q14746	COG2_HUMAN	COG2	Conserved oligomeric Golgi complex subunit 2	Q14746	FALSE	0	-0.00336738	0.158256	0.0774445	0.091277	0.0573523	2.36908	FALSE	FALSE	Stable	Stable
COG3	20.2295	20.1836	20.2625	20.3782	20.3518	20.309	Q96JB2	Q96JB2	COG3_HUMAN	COG3	Conserved oligomeric Golgi complex subunit 3	Q96JB2	FALSE	0	0.0271749	0.215078	0.121126	0.0374011	0.0200083	3.18712	FALSE	FALSE	Stable	Stable
COG4	20.6152	20.608	20.726	20.8374	20.7893	20.817	Q9H9E3	Q9H9E3	COG4_HUMAN	COG4	Conserved oligomeric Golgi complex subunit 4	Q9H9E3	FALSE	0	0.0558193	0.273935	0.164877	0.0218125	0.0104077	3.73738	FALSE	FALSE	Stable	Stable
COG5	21.2402	21.0794	21.1547	21.3972	21.3261	21.3499	Q9UP83	Q9UP83	COG5_HUMAN	COG5	Conserved oligomeric Golgi complex subunit 5	Q9UP83	FALSE	0	0.0735627	0.325668	0.199615	0.0186132	0.00851505	3.91477	FALSE	FALSE	Stable	Stable
COG6	21.5013	21.349	21.368	21.6262	21.5777	21.6136	Q9Y2V7	Q9Y2V7	COG6_HUMAN	COG6	Conserved oligomeric Golgi complex subunit 6	Q9Y2V7	FALSE	0	0.0751857	0.324341	0.199764	0.0178056	0.00806011	3.96405	FALSE	FALSE	Stable	Stable
COG7	21.718	21.7277	21.6839	21.7997	21.8191	21.8645	P83436	P83436	COG7_HUMAN	COG7	Conserved oligomeric Golgi complex subunit 7	P83436	FALSE	0	0.0330929	0.202704	0.117898	0.0291516	0.0147881	3.43675	FALSE	FALSE	Stable	Stable
COG8	21.4826	21.514	21.4287	21.6249	21.62	21.6403	Q96MW5	Q96MW5	COG8_HUMAN	COG8	Conserved oligomeric Golgi complex subunit 8	Q96MW5	FALSE	0	0.065715	0.240835	0.153275	0.0130489	0.00543802	4.32742	FALSE	FALSE	Stable	Stable
COIL	22.4393	22.3403	22.3168	22.465	22.3553	22.3468	P38432	P38432	COIL_HUMAN	COIL	Coilin	P38432	FALSE	0	-0.106799	0.154001	0.023601	0.724363	0.67091	0.44742	FALSE	FALSE	Stable	Stable
COL11A1	18.8733	18.9029	18.8451	19.4654	19.0306	18.9804	P12107	P12107	COBA1_HUMAN	COL11A1	Collagen alpha-1(XI) chain	P12107	FALSE	0	-0.0416985	0.611758	0.28503	0.115788	0.0763412	2.15659	FALSE	FALSE	Stable	Stable
COL12A1	21.3626	21.3238	21.3308	20.413	20.4363	20.3928	Q99715	Q99715	COCA1_HUMAN	COL12A1	Collagen alpha-1(XII) chain	Q99715	FALSE	0	-1.00348	-0.846633	-0.925056	1.34212e-05	1.78028e-07	-29.1603	TRUE	TRUE	Down	Down
COL13A1	15.98	15.9157	15.9881	19.6628	19.627	19.8113	Q5TAT6	Q5TAT6	CODA1_HUMAN	COL13A1	Collagen alpha-1(XIII) chain	Q5TAT6	TRUE	3	3.59554	3.88271	3.73912	1.22181e-06	1.88819e-09	64.3764	TRUE	TRUE	Up	Up
COL18A1	22.1365	22.2062	22.2477	22.1853	22.1577	22.2576	P39060	P39060	COIA1_HUMAN	COL18A1	Collagen alpha-1(XVIII) chain	P39060	FALSE	0	-0.111049	0.117863	0.0034068	0.954154	0.943832	0.073582	FALSE	FALSE	Stable	Stable
COL1A1	23.5817	23.6425	23.6823	20.7703	20.939	20.8251	P02452	P02452;Cont_P02453	CO1A1_HUMAN	COL1A1	Collagen alpha-1(I) chain	P02452	FALSE	0	-2.92847	-2.65288	-2.79067	3.11008e-06	8.01052e-09	-50.067	TRUE	TRUE	Down	Down
COL1A2	19.7745	19.9123	19.7828	19.2152	19.435	19.1591	P08123	P08123	CO1A2_HUMAN	COL1A2	Collagen alpha-2(I) chain	P08123	FALSE	0	-0.761819	-0.345039	-0.553429	0.00261589	0.000707009	-6.56522	TRUE	TRUE	Down	Down
COL4A1	19.6198	19.4628	19.7751	17.1346	15.9164	16.3886	P02462	P02462	CO4A1_HUMAN	COL4A1	Collagen alpha-1(IV) chain	P02462	TRUE	2	-3.89645	-2.38219	-3.13932	0.000482587	6.51717e-05	-10.2501	TRUE	TRUE	Down	Down
COL4A2	21.3379	21.4739	21.46	20.8875	21.0964	21.1194	P08572	P08572	CO4A2_HUMAN	COL4A2	Collagen alpha-2(IV) chain	P08572	FALSE	0	-0.57898	-0.200018	-0.389499	0.00709308	0.00255223	-5.08165	FALSE	FALSE	Stable	Stable
COL5A1	21.5256	21.7438	21.6337	19.5807	19.5011	19.6484	P20908	P20908	CO5A1_HUMAN	COL5A1	Collagen alpha-1(V) chain	P20908	FALSE	0	-2.22912	-1.88611	-2.05762	1.32052e-05	1.61557e-07	-29.659	TRUE	TRUE	Down	Down
COL5A2	21.6413	21.7079	21.5919	20.5645	20.3875	20.4018	P05997	P05997	CO5A2_HUMAN	COL5A2	Collagen alpha-2(V) chain	P05997	FALSE	0	-1.34856	-1.04299	-1.19577	5.05624e-05	1.84929e-06	-19.3478	TRUE	TRUE	Down	Down
COL6A1	20.0986	20.0186	19.9366	20.2956	20.283	20.2729	P12109	P12109	CO6A1_HUMAN	COL6A1	Collagen alpha-1(VI) chain	P12109	FALSE	0	0.146114	0.385631	0.265872	0.00528254	0.0017511	5.48821	FALSE	FALSE	Stable	Stable
COL6A2	19.7253	19.9143	19.8373	19.5756	19.6172	19.4978	P12110	P12110	CO6A2_HUMAN	COL6A2	Collagen alpha-2(VI) chain	P12110	FALSE	0	-0.41332	-0.110917	-0.262119	0.0134866	0.00568469	-4.28554	FALSE	FALSE	Stable	Stable
COL7A1	16.4116	16.7467	16.9812	16.0869	15.8461	16.024	Q02388	Q02388	CO7A1_HUMAN	COL7A1	Collagen alpha-1(VII) chain	Q02388	TRUE	3	-1.10551	-0.349445	-0.727478	0.00913833	0.00349999	-4.75724	TRUE	TRUE	Down	Down
COL8A1	20.345	20.0853	20.2293	21.3218	21.2079	21.2731	P27658	P27658	CO8A1_HUMAN	COL8A1	Collagen alpha-1(VIII) chain	P27658	FALSE	0	0.864818	1.23067	1.04774	0.000147733	1.08006e-05	14.1595	TRUE	TRUE	Up	Up
COLGALT1	23.6972	23.6791	23.716	23.8572	23.8037	23.8946	Q8NBJ5	Q8NBJ5	GT251_HUMAN	COLGALT1	Procollagen galactosyltransferase 1	Q8NBJ5	FALSE	0	0.0632125	0.24551	0.154361	0.0146575	0.0063198	4.1865	FALSE	FALSE	Stable	Stable
COMMD1	19.4626	19.6172	19.5138	19.3117	19.0739	18.9761	Q8N668	Q8N668	COMD1_HUMAN	COMMD1	COMM domain-containing protein 1	Q8N668	FALSE	0	-0.646892	-0.174368	-0.41063	0.0133706	0.00561859	-4.29656	FALSE	FALSE	Stable	Stable
COMMD10	21.305	21.1709	21.0295	21.0358	20.9819	21.0146	Q9Y6G5	Q9Y6G5	COMDA_HUMAN	COMMD10	COMM domain-containing protein 10	Q9Y6G5	FALSE	0	-0.338806	0.0233471	-0.157729	0.11622	0.0766768	-2.15335	FALSE	FALSE	Stable	Stable
COMMD2	20.3446	20.4203	20.426	20.519	20.4698	20.4717	Q86X83	Q86X83	COMD2_HUMAN	COMMD2	COMM domain-containing protein 2	Q86X83	FALSE	0	-0.00453582	0.18416	0.089812	0.0928885	0.0585802	2.35324	FALSE	FALSE	Stable	Stable
COMMD3	20.2485	20.3491	20.426	20.4229	20.4951	20.4941	Q9UBI1	Q9UBI1	COMD3_HUMAN	COMMD3	COMM domain-containing protein 3	Q9UBI1	FALSE	0	-0.00661348	0.265579	0.129483	0.0930099	0.0586808	2.35196	FALSE	FALSE	Stable	Stable
COMMD4	18.7621	18.8781	18.7619	18.3485	18.334	18.2952	Q9H0A8	Q9H0A8	COMD4_HUMAN	COMMD4	COMM domain-containing protein 4	Q9H0A8	FALSE	0	-0.585711	-0.363831	-0.474771	0.000426616	5.47608e-05	-10.5794	FALSE	FALSE	Stable	Stable
COMMD5	21.7396	21.6952	21.6492	21.3992	21.4723	21.4692	Q9GZQ3	Q9GZQ3	COMD5_HUMAN	COMMD5	COMM domain-containing protein 5	Q9GZQ3	FALSE	0	-0.348733	-0.146915	-0.247824	0.00353557	0.00105543	-6.07123	FALSE	FALSE	Stable	Stable
COMMD7	20.4402	20.5268	20.3925	20.6614	20.3349	20.5388	Q86VX2	Q86VX2	COMD7_HUMAN	COMMD7	COMM domain-containing protein 7	Q86VX2	FALSE	0	-0.164919	0.281981	0.0585309	0.60659	0.54222	0.647543	FALSE	FALSE	Stable	Stable
COMMD8	21.2008	21.2927	21.2972	20.9652	20.9386	20.9456	Q9NX08	Q9NX08	COMD8_HUMAN	COMMD8	COMM domain-containing protein 8	Q9NX08	FALSE	0	-0.410368	-0.217138	-0.313753	0.00118116	0.00024543	-8.02799	FALSE	FALSE	Stable	Stable
COMMD9	22.6379	22.7225	22.6445	22.3853	22.4775	22.4171	Q9P000	Q9P000	COMD9_HUMAN	COMMD9	COMM domain-containing protein 9	Q9P000	FALSE	0	-0.347091	-0.136211	-0.241651	0.00466771	0.00149499	-5.66561	FALSE	FALSE	Stable	Stable
COMT	22.7173	22.6461	22.827	22.7144	22.5272	22.7456	P21964	P21964	COMT_HUMAN	COMT	Catechol O-methyltransferase	P21964	FALSE	0	-0.258475	0.123001	-0.067737	0.486547	0.415116	-0.877917	FALSE	FALSE	Stable	Stable
COMTD1	18.9878	19.1555	19.0758	18.891	18.9632	19.0855	Q86VU5	Q86VU5	CMTD1_HUMAN	COMTD1	Catechol O-methyltransferase domain-containing protein 1	Q86VU5	FALSE	0	-0.261971	0.0757208	-0.0931252	0.287319	0.223639	-1.36345	FALSE	FALSE	Stable	Stable
COPA	25.3755	25.3747	25.3573	25.4934	25.4602	25.4362	P53621	P53621	COPA_HUMAN	COPA	Coatomer subunit alpha	P53621	FALSE	0	0.0153936	0.172795	0.0940943	0.0475753	0.0267071	2.95562	FALSE	FALSE	Stable	Stable
COPB1	23.9012	23.8013	23.8468	24.0662	24.0487	24.0534	P53618	P53618	COPB_HUMAN	COPB1	Coatomer subunit beta	P53618	FALSE	0	0.113953	0.298688	0.20632	0.00515289	0.00169883	5.52189	FALSE	FALSE	Stable	Stable
COPB2	23.421	23.4369	23.4536	23.65	23.5499	23.62	P35606	P35606	COPB2_HUMAN	COPB2	Coatomer subunit beta'	P35606	FALSE	0	0.0746406	0.264274	0.169457	0.012092	0.00494423	4.41814	FALSE	FALSE	Stable	Stable
COPE	23.6203	23.5975	23.6845	23.6063	23.6975	23.7639	O14579	O14579	COPE_HUMAN	COPE	Coatomer subunit epsilon	O14579	FALSE	0	-0.0737229	0.183997	0.0551373	0.402669	0.332507	1.05777	FALSE	FALSE	Stable	Stable
COPG1	24.4727	24.4956	24.5091	24.6447	24.6239	24.6686	Q9Y678	Q9UBF2;Q9Y678	COPG1_HUMAN	COPG1	Coatomer subunit gamma-1	Q9Y678	FALSE	0	0.0754277	0.231155	0.153291	0.00840563	0.00314086	4.86684	FALSE	FALSE	Stable	Stable
COPG2	22.8881	22.8501	22.8056	22.9384	22.913	23.0127	Q9UBF2	Q9UBF2	COPG2_HUMAN	COPG2	Coatomer subunit gamma-2	Q9UBF2	FALSE	0	0.0014435	0.212046	0.106745	0.0783468	0.0478052	2.50598	FALSE	FALSE	Stable	Stable
COPRS	19.8303	19.8264	19.8308	20.2692	20.4969	20.1972	Q9NQ92	Q9NQ92	COPRS_HUMAN	COPRS	Coordinator of PRMT5 and differentiation stimulator	Q9NQ92	FALSE	0	0.293145	0.690729	0.491937	0.00343416	0.00101548	6.11752	FALSE	FALSE	Stable	Stable
COPS2	23.2356	23.1769	23.1454	23.0209	22.9499	22.9331	P61201	P61201	CSN2_HUMAN	COPS2	COP9 signalosome complex subunit 2	P61201	FALSE	0	-0.322476	-0.113538	-0.218007	0.00672062	0.00237239	-5.15879	FALSE	FALSE	Stable	Stable
COPS3	22.9474	22.977	23.0762	23.1254	22.969	22.9616	Q9UNS2	Q9UNS2	CSN3_HUMAN	COPS3	COP9 signalosome complex subunit 3	Q9UNS2	FALSE	0	-0.134582	0.171563	0.0184904	0.81548	0.775715	0.298617	FALSE	FALSE	Stable	Stable
COPS4	23.9151	23.8722	23.8128	23.6094	23.6657	23.6293	Q9BT78	Q9BT78	CSN4_HUMAN	COPS4	COP9 signalosome complex subunit 4	Q9BT78	FALSE	0	-0.330675	-0.133075	-0.231875	0.00424336	0.00132741	-5.80176	FALSE	FALSE	Stable	Stable
COPS5	22.7323	22.7592	22.7378	22.5682	22.5322	22.5024	Q92905	Q92905	CSN5_HUMAN	COPS5	COP9 signalosome complex subunit 5	Q92905	FALSE	0	-0.290646	-0.126968	-0.208807	0.00305811	0.000868794	-6.30739	FALSE	FALSE	Stable	Stable
COPS6	21.3401	21.3731	21.4559	21.1065	21.237	21.5059	Q7L5N1	Q7L5N1	CSN6_HUMAN	COPS6	COP9 signalosome complex subunit 6	Q7L5N1	FALSE	0	-0.36846	0.155384	-0.106538	0.425213	0.355011	-1.00553	FALSE	FALSE	Stable	Stable
COPS7A	22.7376	22.691	22.6282	22.6819	22.675	22.6598	Q9UBW8	Q9UBW8	CSN7A_HUMAN	COPS7A	COP9 signalosome complex subunit 7a	Q9UBW8	FALSE	0	-0.109925	0.0831945	-0.0133651	0.789035	0.744366	-0.342169	FALSE	FALSE	Stable	Stable
COPS7B	20.6098	20.549	20.4659	20.0813	20.2312	20.1913	Q9H9Q2	Q9H9Q2	CSN7B_HUMAN	COPS7B	COP9 signalosome complex subunit 7b	Q9H9Q2	FALSE	0	-0.517816	-0.229437	-0.373626	0.00287579	0.000802502	-6.40574	FALSE	FALSE	Stable	Stable
COPS8	21.6938	21.6004	21.6225	21.4283	21.644	21.5958	Q99627	Q99627	CSN8_HUMAN	COPS8	COP9 signalosome complex subunit 8	Q99627	FALSE	0	-0.245288	0.079556	-0.0828661	0.322228	0.255915	-1.26123	FALSE	FALSE	Stable	Stable
COPZ1	24.9015	25.001	24.9725	25.2574	25.0641	25.1296	P61923	P61923	COPZ1_HUMAN	COPZ1	Coatomer subunit zeta-1	P61923	FALSE	0	0.042845	0.341251	0.192048	0.0375576	0.0201355	3.18197	FALSE	FALSE	Stable	Stable
COPZ2	20.7922	20.7615	20.8606	20.1939	20.242	20.2307	Q9P299	Q9P299	COPZ2_HUMAN	COPZ2	Coatomer subunit zeta-2	Q9P299	FALSE	0	-0.679605	-0.485503	-0.582554	0.000124153	8.29822e-06	-14.8389	TRUE	TRUE	Down	Down
COQ10B	20.0672	20.2793	20.4093	20.2184	20.2745	20.3157	Q9H8M1	Q9H8M1	CQ10B_HUMAN	COQ10B	Coenzyme Q-binding protein COQ10 homolog B, mitochondrial	Q9H8M1	FALSE	0	-0.207006	0.24228	0.0176374	0.879501	0.85277	0.194091	FALSE	FALSE	Stable	Stable
COQ5	18.7539	19.0367	18.6289	19.1876	19.0911	19.2878	Q5HYK3	Q5HYK3	COQ5_HUMAN	COQ5	2-methoxy-6-polyprenyl-1,4-benzoquinol methylase, mitochondrial	Q5HYK3	FALSE	0	0.0989017	0.665783	0.382342	0.0321977	0.0167146	3.33468	FALSE	FALSE	Stable	Stable
COQ6	20.7484	20.6866	20.757	20.3789	20.7188	20.7241	Q9Y2Z9	Q9Y2Z9	COQ6_HUMAN	COQ6	Ubiquinone biosynthesis monooxygenase COQ6, mitochondrial	Q9Y2Z9	FALSE	0	-0.372997	0.126259	-0.123369	0.336822	0.269458	-1.22174	FALSE	FALSE	Stable	Stable
COQ7	20.2277	20.1495	20.2074	20.6123	20.4752	20.5106	Q99807	Q99807	COQ7_HUMAN	COQ7	5-demethoxyubiquinone hydroxylase, mitochondrial	Q99807	FALSE	0	0.217949	0.457786	0.337867	0.00205824	0.00052006	6.96504	FALSE	FALSE	Stable	Stable
COQ8A	19.4157	19.5416	19.3494	19.3817	19.5297	19.5599	Q8NI60	Q8NI60	COQ8A_HUMAN	COQ8A	Atypical kinase COQ8A, mitochondrial	Q8NI60	FALSE	0	-0.121901	0.231572	0.0548358	0.542347	0.47334	0.767012	FALSE	FALSE	Stable	Stable
COQ8B	20.1738	20.0069	20.053	19.3727	19.4499	19.427	Q96D53	Q96D53	COQ8B_HUMAN	COQ8B	Atypical kinase COQ8B, mitochondrial	Q96D53	FALSE	0	-0.794085	-0.528694	-0.661389	0.000240457	2.35178e-05	-12.3216	TRUE	TRUE	Down	Down
COQ9	19.7788	19.7809	19.8029	20.1628	20.1127	20.2012	O75208	O75208	COQ9_HUMAN	COQ9	Ubiquinone biosynthesis protein COQ9, mitochondrial	O75208	FALSE	0	0.282351	0.460339	0.371345	0.000469044	6.29419e-05	10.3152	FALSE	FALSE	Stable	Stable
CORO1A	20.2901	20.2322	20.249	19.1026	19.0587	19.1486	P31146	P31146	COR1A_HUMAN	CORO1A	Coronin-1A	P31146	FALSE	0	-1.24859	-1.05898	-1.15378	1.27033e-05	1.48873e-07	-30.0857	TRUE	TRUE	Down	Down
CORO1B	23.611	23.5293	23.6121	23.6892	23.5604	23.6001	Q9BR76	Q9BR76	COR1B_HUMAN	CORO1B	Coronin-1B	Q9BR76	FALSE	0	-0.086813	0.151747	0.032467	0.592794	0.527089	0.672882	FALSE	FALSE	Stable	Stable
CORO1C	24.472	24.4569	24.4959	24.5722	24.627	24.6198	Q9ULV4	Q9ULV4	COR1C_HUMAN	CORO1C	Coronin-1C	Q9ULV4	FALSE	0	0.0496803	0.213137	0.131409	0.0176046	0.00796458	3.9748	FALSE	FALSE	Stable	Stable
CORO2A	20.6515	20.5407	20.5665	21.0605	20.9716	20.9348	Q92828	Q92828	COR2A_HUMAN	CORO2A	Coronin-2A	Q92828	FALSE	0	0.278025	0.527341	0.402683	0.00120495	0.000252473	7.9856	FALSE	FALSE	Stable	Stable
CORO2B	19.1149	18.7885	19.3325	20.6398	20.451	20.4786	Q9UQ03	Q9UQ03	COR2B_HUMAN	CORO2B	Coronin-2B	Q9UQ03	FALSE	0	1.09	1.79902	1.44451	0.000508359	7.17223e-05	10.0729	TRUE	TRUE	Up	Up
CORO7	22.3934	22.3394	22.3371	22.8405	22.8501	22.7745	P57737	P57737	CORO7_HUMAN	CORO7	Coronin-7	P57737	FALSE	0	0.371764	0.558411	0.465087	0.000240457	2.35348e-05	12.32	FALSE	FALSE	Stable	Stable
COTL1	21.5156	21.5962	21.5898	22.3304	22.1389	22.1897	Q14019	Q14019	COTL1_HUMAN	COTL1	Coactosin-like protein	Q14019	FALSE	0	0.505398	0.799606	0.652502	0.000371978	4.49344e-05	10.9653	TRUE	TRUE	Up	Up
COX11	18.7533	19.1027	18.8935	19.2795	19.1198	19.5536	Q9Y6N1	Q9Y6N1	COX11_HUMAN	COX11	Cytochrome c oxidase assembly protein COX11, mitochondrial	Q9Y6N1	FALSE	0	0.0594379	0.742784	0.401111	0.0504171	0.0285816	2.90214	FALSE	FALSE	Stable	Stable
COX15	19.1331	19.0394	18.935	19.0883	18.7582	17.6996	Q7KZN9	Q7KZN9	COX15_HUMAN	COX15	Cytochrome c oxidase assembly protein COX15 homolog	Q7KZN9	FALSE	0	-1.39436	0.353431	-0.520463	0.255428	0.193388	-1.4723	FALSE	FALSE	Stable	Stable
COX16	19.9601	19.831	20.0907	19.27	19.4772	19.2963	Q9P0S2	Q9P0S2	COX16_HUMAN	COX16	Cytochrome c oxidase assembly protein COX16 homolog, mitochondrial	Q9P0S2	FALSE	0	-0.828934	-0.396579	-0.612757	0.00201493	0.000503927	-7.00716	TRUE	TRUE	Down	Down
COX17	18.166	18.49	17.4573	18.285	18.3394	18.5059	Q14061	Q14061	COX17_HUMAN	COX17	Cytochrome c oxidase copper chaperone	Q14061	FALSE	0	-0.307799	0.985807	0.339004	0.309806	0.244601	1.29568	FALSE	FALSE	Stable	Stable
COX19	18.3414	18.4353	18.5482	18.2875	18.8271	18.4798	Q49B96	Q49B96	COX19_HUMAN	COX19	Cytochrome c oxidase assembly protein COX19	Q49B96	FALSE	0	-0.265002	0.444623	0.0898102	0.618729	0.555462	0.625736	FALSE	FALSE	Stable	Stable
COX20	21.6448	21.7794	21.5871	21.2579	21.3564	21.1937	Q5RI15	Q5RI15	COX20_HUMAN	COX20	Cytochrome c oxidase assembly protein COX20, mitochondrial	Q5RI15	FALSE	0	-0.568926	-0.233348	-0.401137	0.00394083	0.0012094	-5.91007	FALSE	FALSE	Stable	Stable
COX4I1	24.495	24.4684	24.4153	24.6165	24.7719	24.6336	P13073	P13073	COX41_HUMAN	COX4I1	Cytochrome c oxidase subunit 4 isoform 1, mitochondrial	P13073	FALSE	0	0.0822794	0.346673	0.214476	0.0170711	0.00765438	4.01072	FALSE	FALSE	Stable	Stable
COX5A	19.3284	19.4894	19.3447	19.8707	19.8597	19.631	P20674	P20674	COX5A_HUMAN	COX5A	Cytochrome c oxidase subunit 5A, mitochondrial	P20674	FALSE	0	0.194964	0.604364	0.399664	0.00864495	0.0032676	4.8266	FALSE	FALSE	Stable	Stable
COX5B	24.321	24.2827	24.3338	24.0794	24.2617	24.0779	P10606	P10606	COX5B_HUMAN	COX5B	Cytochrome c oxidase subunit 5B, mitochondrial	P10606	FALSE	0	-0.320136	-0.0255334	-0.172835	0.0504811	0.0286374	-2.9006	FALSE	FALSE	Stable	Stable
COX6B1	23.8324	23.7018	23.5027	23.4075	23.4776	23.5392	P14854	P14854	CX6B1_HUMAN	COX6B1	Cytochrome c oxidase subunit 6B1	P14854	FALSE	0	-0.427808	0.0194617	-0.204173	0.103517	0.0666647	-2.25696	FALSE	FALSE	Stable	Stable
COX6C	24.6948	24.7043	24.4382	24.3939	24.8179	24.9674	P09669	P09669	COX6C_HUMAN	COX6C	Cytochrome c oxidase subunit 6C	P09669	FALSE	0	-0.288988	0.516903	0.113958	0.578874	0.511705	0.699134	FALSE	FALSE	Stable	Stable
COX7A2	24.5032	24.9001	25.0666	25.0868	24.9288	24.9293	P14406	P14406	CX7A2_HUMAN	COX7A2	Cytochrome c oxidase subunit 7A2, mitochondrial	P14406	FALSE	0	-0.20937	0.525993	0.158312	0.399689	0.329735	1.0644	FALSE	FALSE	Stable	Stable
COX7A2L	22.9797	22.9402	22.9894	22.975	22.8178	22.7341	O14548	O14548	COX7R_HUMAN	COX7A2L	Cytochrome c oxidase subunit 7A-related protein, mitochondrial	O14548	FALSE	0	-0.291784	0.0368229	-0.12748	0.152646	0.105584	-1.91806	FALSE	FALSE	Stable	Stable
COX7C	23.9001	23.9389	23.9024	24.0667	23.9424	23.9834	P15954	P15954	COX7C_HUMAN	COX7C	Cytochrome c oxidase subunit 7C, mitochondrial	P15954	FALSE	0	-0.0222109	0.189633	0.083711	0.146606	0.100575	1.95371	FALSE	FALSE	Stable	Stable
CPA2	15.9446	16.9999	16.6876	17.3674	17.4474	17.2638	P48052	P48052	CBPA2_HUMAN	CPA2	Carboxypeptidase A2	P48052	TRUE	1	0.157697	1.4734	0.815547	0.0422875	0.0232869	3.06469	FALSE	FALSE	Stable	Stable
CPA4	21.7311	21.6532	21.6352	20.4514	20.5224	20.6962	Q9UI42	Q9UI42	CBPA4_HUMAN	CPA4	Carboxypeptidase A4	Q9UI42	FALSE	0	-1.29256	-0.940461	-1.11651	0.000102672	6.08547e-06	-15.6782	TRUE	TRUE	Down	Down
CPD	21.5035	21.5059	21.4887	21.8274	21.8577	21.8247	O75976	O75976	CBPD_HUMAN	CPD	Carboxypeptidase D	O75976	FALSE	0	0.263278	0.411235	0.337257	0.000338411	3.86133e-05	11.2699	FALSE	FALSE	Stable	Stable
CPEB4	20.2673	20.4265	20.3733	20.8281	20.9172	20.9407	Q17RY0	Q17RY0	CPEB4_HUMAN	CPEB4	Cytoplasmic polyadenylation element-binding protein 4	Q17RY0	FALSE	0	0.401262	0.678135	0.539699	0.000603694	9.13592e-05	9.63751	TRUE	TRUE	Up	Up
CPNE1	24.5062	24.3802	24.5406	24.7985	24.7703	24.7799	Q99829	Q99829	CPNE1_HUMAN	CPNE1	Copine-1	Q99829	FALSE	0	0.183708	0.430736	0.307222	0.0033631	0.000989356	6.14892	FALSE	FALSE	Stable	Stable
CPNE2	20.9346	20.9625	21.0507	20.4582	20.422	20.5443	Q96FN4	Q96FN4	CPNE2_HUMAN	CPNE2	Copine-2	Q96FN4	FALSE	0	-0.632864	-0.382632	-0.507748	0.000516249	7.33319e-05	-10.0323	TRUE	TRUE	Down	Down
CPNE3	24.6468	24.5954	24.6605	24.8827	24.8392	24.8993	O75131	O75131	CPNE3_HUMAN	CPNE3	Copine-3	O75131	FALSE	0	0.150612	0.328393	0.239503	0.00246925	0.000656134	6.6607	FALSE	FALSE	Stable	Stable
CPNE8	19.9054	19.9218	20.0454	18.0281	18.1244	18.1247	Q86YQ8	Q9HCH3;Q86YQ8	CPNE8_HUMAN	CPNE8	Copine-8	Q86YQ8	FALSE	0	-1.99762	-1.73269	-1.86516	8.35575e-06	6.45647e-08	-34.8078	TRUE	TRUE	Down	Down
CPOX	21.8232	21.6934	21.7689	22.0568	22.0709	22.0934	P36551	P36551	HEM6_HUMAN	CPOX	Oxygen-dependent coproporphyrinogen-III oxidase, mitochondrial	P36551	FALSE	0	0.205264	0.418539	0.311901	0.00178837	0.000427458	7.23054	FALSE	FALSE	Stable	Stable
CPPED1	22.892	22.8584	22.9081	23.6842	23.6719	23.7571	Q9BRF8	Q9BRF8	CPPED_HUMAN	CPPED1	Serine/threonine-protein phosphatase CPPED1	Q9BRF8	FALSE	0	0.724523	0.911993	0.818258	3.72733e-05	9.93634e-07	21.58	TRUE	TRUE	Up	Up
CPQ	19.8292	19.5872	19.8088	19.8827	19.8641	19.7871	Q9Y646	Q9Y646	CBPQ_HUMAN	CPQ	Carboxypeptidase Q	Q9Y646	FALSE	0	-0.081496	0.287315	0.102909	0.28207	0.218899	1.37958	FALSE	FALSE	Stable	Stable
CPS1	18.7667	18.8481	18.9376	18.758	18.7874	18.7035	P31327	P31327	CPSM_HUMAN	CPS1	Carbamoyl-phosphate synthase [ammonia], mitochondrial	P31327	FALSE	0	-0.234543	0.0321938	-0.101175	0.160572	0.111914	-1.87535	FALSE	FALSE	Stable	Stable
CPSF1	22.3274	22.247	22.2725	21.8128	21.8445	21.7414	Q10570	Q10570	CPSF1_HUMAN	CPSF1	Cleavage and polyadenylation specificity factor subunit 1	Q10570	FALSE	0	-0.58862	-0.376799	-0.482709	0.000338497	3.86667e-05	-11.267	FALSE	FALSE	Stable	Stable
CPSF2	22.1119	22.1625	22.113	22.2077	22.0443	22.1488	Q9P2I0	Q9P2I0	CPSF2_HUMAN	CPSF2	Cleavage and polyadenylation specificity factor subunit 2	Q9P2I0	FALSE	0	-0.121013	0.129993	0.00448987	0.945407	0.932523	0.0884389	FALSE	FALSE	Stable	Stable
CPSF3	22.3818	22.3282	22.4081	22.5116	22.5083	22.46	Q9UKF6	Q9UKF6	CPSF3_HUMAN	CPSF3	Cleavage and polyadenylation specificity factor subunit 3	Q9UKF6	FALSE	0	0.0289575	0.212237	0.120597	0.0349875	0.0184512	3.25325	FALSE	FALSE	Stable	Stable
CPSF4	21.1874	21.2424	21.2795	21.1058	21.1618	21.1578	O95639	O95639	CPSF4_HUMAN	CPSF4	Cleavage and polyadenylation specificity factor subunit 4	O95639	FALSE	0	-0.191053	0.00178607	-0.0946335	0.0855151	0.0531372	-2.4263	FALSE	FALSE	Stable	Stable
CPSF6	23.7083	23.8563	23.6661	23.7975	23.837	23.8107	Q16630	Q16630	CPSF6_HUMAN	CPSF6	Cleavage and polyadenylation specificity factor subunit 6	Q16630	FALSE	0	-0.0683524	0.211432	0.0715397	0.321184	0.254921	1.26421	FALSE	FALSE	Stable	Stable
CPSF7	23.0372	22.9907	23.0719	23.2144	23.1906	23.1942	Q8N684	Q8N684	CPSF7_HUMAN	CPSF7	Cleavage and polyadenylation specificity factor subunit 7	Q8N684	FALSE	0	0.0801213	0.252847	0.166484	0.00908787	0.0034713	4.76551	FALSE	FALSE	Stable	Stable
CPT1A	21.8904	21.9263	21.9783	21.8192	21.7557	21.7583	P50416	P50416	CPT1A_HUMAN	CPT1A	Carnitine O-palmitoyltransferase 1, liver isoform	P50416	FALSE	0	-0.251272	-0.056643	-0.153958	0.0186619	0.00855108	-3.91099	FALSE	FALSE	Stable	Stable
CPT2	21.2381	21.2061	21.3191	21.0576	21.101	21.0448	P23786	P23786	CPT2_HUMAN	CPT2	Carnitine O-palmitoyltransferase 2, mitochondrial	P23786	FALSE	0	-0.291022	-0.0822422	-0.186632	0.01208	0.00493624	-4.41969	FALSE	FALSE	Stable	Stable
CPTP	20.575	20.4954	20.4219	20.6818	20.8647	20.754	Q5TA50	Q5TA50	CPTP_HUMAN	CPTP	Ceramide-1-phosphate transfer protein	Q5TA50	FALSE	0	0.110701	0.428042	0.269371	0.0145219	0.00625014	4.1968	FALSE	FALSE	Stable	Stable
CPZ	20.5327	20.6568	20.6075	18.6355	18.8124	18.7307	Q66K79	Q66K79	CBPZ_HUMAN	CPZ	Carboxypeptidase Z	Q66K79	FALSE	0	-2.01934	-1.72616	-1.87275	1.06232e-05	1.12728e-07	-31.5826	TRUE	TRUE	Down	Down
CRABP2	20.7169	20.6914	20.7875	19.526	19.3818	19.5761	P29373	P29373	RABP2_HUMAN	CRABP2	Cellular retinoic acid-binding protein 2	P29373	FALSE	0	-1.38823	-1.08641	-1.23732	4.36867e-05	1.41968e-06	-20.2688	TRUE	TRUE	Down	Down
CRACR2A	16.1427	15.8481	15.9212	16.6831	16.8194	16.9519	Q9BSW2	Q9BSW2	EFC4B_HUMAN	CRACR2A	EF-hand calcium-binding domain-containing protein 4B	Q9BSW2	TRUE	3	0.594949	1.09994	0.847446	0.00104194	0.000205704	8.29698	TRUE	TRUE	Up	Up
CRADD	19.8076	19.9063	19.883	20.0695	19.9971	19.8934	P78560	P78560	CRADD_HUMAN	CRADD	Death domain-containing protein CRADD	P78560	FALSE	0	-0.0194999	0.261532	0.121016	0.119633	0.0792454	2.12903	FALSE	FALSE	Stable	Stable
CRAMP1	16.6914	16.6801	15.9771	16.9575	16.6931	16.4348	Q96RY5	Q96RY5	CRML_HUMAN	CRAMP1	Protein cramped-like	Q96RY5	TRUE	1	-0.336131	0.827434	0.245652	0.408216	0.338402	1.04381	FALSE	FALSE	Stable	Stable
CRAT	22.06	22.0499	22.0968	22.1522	22.0712	22.0751	P43155	P43155	CACP_HUMAN	CRAT	Carnitine O-acetyltransferase	P43155	FALSE	0	-0.0625946	0.123821	0.0306131	0.519077	0.449086	0.811932	FALSE	FALSE	Stable	Stable
CREB1	22.9609	23.0061	22.7421	22.7761	22.8751	22.7527	P16220	P16220;P18846	CREB1_HUMAN	CREB1	Cyclic AMP-responsive element-binding protein 1	P16220	FALSE	0	-0.299351	0.0958641	-0.101744	0.318042	0.252058	-1.27282	FALSE	FALSE	Stable	Stable
CREB3L1	19.428	19.0021	19.4446	19.8453	19.7354	19.5253	Q96BA8	Q70SY1;Q96BA8	CR3L1_HUMAN	CREB3L1	Cyclic AMP-responsive element-binding protein 3-like protein 1	Q96BA8	FALSE	0	0.0480703	0.772764	0.410417	0.0563621	0.0325688	2.80004	FALSE	FALSE	Stable	Stable
CREBBP	19.9293	19.9738	19.7053	19.6176	19.5978	19.7246	Q92793	Q92793	CBP_HUMAN	CREBBP	CREB-binding protein	Q92793	FALSE	0	-0.424661	-0.020889	-0.222775	0.0611978	0.0357493	-2.72787	FALSE	FALSE	Stable	Stable
CREG1	19.0379	19.2649	19.2347	18.845	18.8316	18.795	O75629	O75629	CREG1_HUMAN	CREG1	Protein CREG1	O75629	FALSE	0	-0.520592	-0.190002	-0.355297	0.00599845	0.0020533	-5.31369	FALSE	FALSE	Stable	Stable
CRELD1	21.3659	21.386	21.3317	20.94	21.2087	21.1241	Q96HD1	Q96HD1	CREL1_HUMAN	CRELD1	Protein disulfide isomerase CRELD1	Q96HD1	FALSE	0	-0.451046	-0.0895778	-0.270312	0.022698	0.0108974	-3.69734	FALSE	FALSE	Stable	Stable
CRELD2	21.5502	21.4432	21.2493	21.4012	21.4175	21.3202	Q6UXH1	Q6UXH1	CREL2_HUMAN	CRELD2	Protein disulfide isomerase CRELD2	Q6UXH1	FALSE	0	-0.238644	0.169396	-0.0346236	0.7415	0.69003	-0.41953	FALSE	FALSE	Stable	Stable
CRIM1	20.1625	20.1228	20.0342	20.511	20.6265	20.5429	Q9NZV1	Q9NZV1	CRIM1_HUMAN	CRIM1	Cysteine-rich motor neuron 1 protein	Q9NZV1	FALSE	0	0.327029	0.58023	0.45363	0.000817561	0.00014456	8.85787	FALSE	FALSE	Stable	Stable
CRIP2	20.5415	20.66	20.8066	20.3463	20.4996	20.4136	P52943	P52943	CRIP2_HUMAN	CRIP2	Cysteine-rich protein 2	P52943	FALSE	0	-0.444936	-0.0541262	-0.249531	0.038462	0.020769	-3.15685	FALSE	FALSE	Stable	Stable
CRISPLD2	18.4543	18.5367	18.637	17.4927	15.8962	17.4924	Q9H0B8	Q9H0B8	CRLD2_HUMAN	CRISPLD2	Cysteine-rich secretory protein LCCL domain-containing 2	Q9H0B8	TRUE	1	-2.68627	-0.478175	-1.58222	0.0262954	0.013044	-3.54278	FALSE	FALSE	Stable	Stable
CRK	23.511	23.5126	23.5908	23.5227	23.5016	23.4105	P46108	P46108	CRK_HUMAN	CRK	Adapter molecule crk	P46108	FALSE	0	-0.173222	0.0534712	-0.0598756	0.306404	0.241335	-1.30588	FALSE	FALSE	Stable	Stable
CRKL	23.9316	24.0155	23.8906	23.5868	23.636	23.6358	P46109	P46109	CRKL_HUMAN	CRKL	Crk-like protein	P46109	FALSE	0	-0.434786	-0.217997	-0.326392	0.00159622	0.00036673	-7.44379	FALSE	FALSE	Stable	Stable
CRLF3	20.6966	20.7746	20.747	21.0253	21.0552	21.0403	Q8IUI8	Q8IUI8	CRLF3_HUMAN	CRLF3	Cytokine receptor-like factor 3	Q8IUI8	FALSE	0	0.214812	0.386911	0.300862	0.000894987	0.000165051	8.64332	FALSE	FALSE	Stable	Stable
CRNKL1	22.1294	22.0546	22.0037	21.8113	21.8204	21.8315	Q9BZJ0	Q9BZJ0	CRNL1_HUMAN	CRNKL1	Crooked neck-like protein 1	Q9BZJ0	FALSE	0	-0.344801	-0.138175	-0.241488	0.0043091	0.00135461	-5.77836	FALSE	FALSE	Stable	Stable
CROCC	19.7412	19.7985	19.8224	19.324	19.4245	19.347	Q5TZA2	Q5TZA2;Q8IVE0	CROCC_HUMAN	CROCC	Rootletin	Q5TZA2	FALSE	0	-0.528349	-0.316097	-0.422223	0.000556867	8.17551e-05	-9.83521	FALSE	FALSE	Stable	Stable
CROT	20.1025	20.205	19.9792	20.4245	20.4065	20.3329	Q9UKG9	Q9UKG9	OCTC_HUMAN	CROT	Peroxisomal carnitine O-octanoyltransferase	Q9UKG9	FALSE	0	0.130249	0.454583	0.292416	0.0116939	0.00474535	4.45762	FALSE	FALSE	Stable	Stable
CRPPA	17.6798	18.4008	18.1157	18.6998	18.7997	18.8041	A4D126	A4D126	ISPD_HUMAN	CRPPA	D-ribitol-5-phosphate cytidylyltransferase	A4D126	FALSE	0	0.259304	1.14556	0.702434	0.0185494	0.00847801	3.91867	FALSE	FALSE	Up	Stable
CRTAP	23.4261	23.3971	23.402	23.479	23.4046	23.3723	O75718	O75718	CRTAP_HUMAN	CRTAP	Cartilage-associated protein	O75718	FALSE	0	-0.0870428	0.107455	0.0102059	0.840137	0.804325	0.259436	FALSE	FALSE	Stable	Stable
CRTC2	19.5724	19.9035	20.0053	20.0107	19.9648	20.168	Q53ET0	Q53ET0	CRTC2_HUMAN	CRTC2	CREB-regulated transcription coactivator 2	Q53ET0	FALSE	0	-0.0849215	0.526477	0.220778	0.178144	0.126525	1.78536	FALSE	FALSE	Stable	Stable
CRTC3	18.8875	19.408	18.9574	18.0556	18.0538	18.0561	Q6UUV7	Q6UUV7	CRTC3_HUMAN	CRTC3	CREB-regulated transcription coactivator 3	Q6UUV7	FALSE	0	-1.37235	-0.685876	-1.02911	0.00162278	0.000375131	-7.41194	TRUE	TRUE	Down	Down
CRY1	17.5441	17.1675	17.4705	17.4287	17.2112	17.3788	Q16526	Q16526	CRY1_HUMAN	CRY1	Cryptochrome-1	Q16526	FALSE	0	-0.33662	0.227707	-0.0544563	0.706345	0.650857	-0.477102	FALSE	FALSE	Stable	Stable
CRYAB	19.465	19.5887	19.8428	17.9828	18.3508	18.2232	P02511	P02511	CRYAB_HUMAN	CRYAB	Alpha-crystallin B chain	P02511	FALSE	0	-1.77332	-1.11981	-1.44656	0.000374533	4.54169e-05	-10.9441	TRUE	TRUE	Down	Down
CRYBG1	21.0506	21.1424	20.9824	19.9132	19.9617	20.007	Q9Y4K1	Q9Y4K1	CRBG1_HUMAN	CRYBG1	Beta/gamma crystallin domain-containing protein 1	Q9Y4K1	FALSE	0	-1.22869	-0.967028	-1.09786	4.22971e-05	1.24422e-06	-20.7442	TRUE	TRUE	Down	Down
CRYBG3	20.1026	20.2465	20.1352	20.4431	20.4753	20.4491	Q68DQ2	Q68DQ2	CRBG3_HUMAN	CRYBG3	Very large A-kinase anchor protein	Q68DQ2	FALSE	0	0.178885	0.409901	0.294393	0.00306952	0.000873617	6.30057	FALSE	FALSE	Stable	Stable
CRYL1	18.2887	18.0126	18.0801	19.3865	19.317	19.3793	Q9Y2S2	Q9Y2S2	CRYL1_HUMAN	CRYL1	Lambda-crystallin homolog	Q9Y2S2	FALSE	0	1.04345	1.42422	1.23383	9.78668e-05	5.38604e-06	16.021	TRUE	TRUE	Up	Up
CRYZ	23.4052	23.456	23.3854	23.464	23.4679	23.4533	Q08257	Q08257	QOR_HUMAN	CRYZ	Quinone oxidoreductase	Q08257	FALSE	0	-0.0364994	0.128885	0.0461928	0.281653	0.218504	1.38094	FALSE	FALSE	Stable	Stable
CRYZL1	21.9247	21.8319	21.935	21.854	21.7966	21.7231	O95825	O95825	QORL1_HUMAN	CRYZL1	Quinone oxidoreductase-like protein 1	O95825	FALSE	0	-0.230604	0.0186313	-0.105986	0.123216	0.0821493	-2.10249	FALSE	FALSE	Stable	Stable
CS	24.51	24.594	24.5612	24.631	24.5644	24.6178	O75390	O75390	CISY_HUMAN	CS	Citrate synthase, mitochondrial	O75390	FALSE	0	-0.0464327	0.145147	0.0493573	0.317693	0.25174	1.27378	FALSE	FALSE	Stable	Stable
CSDE1	22.6718	22.6445	22.6609	22.4926	22.4266	22.4713	O75534	O75534	CSDE1_HUMAN	CSDE1	Cold shock domain-containing protein E1	O75534	FALSE	0	-0.277729	-0.113437	-0.195583	0.00400653	0.00123472	-5.88583	FALSE	FALSE	Stable	Stable
CSE1L	25.9083	25.8991	25.9296	26.1868	26.1285	26.1313	P55060	P55060	XPO2_HUMAN	CSE1L	Exportin-2	P55060	FALSE	0	0.154376	0.318689	0.236532	0.00189901	0.000464421	7.11725	FALSE	FALSE	Stable	Stable
CSF1	17.5498	18.0087	17.282	17.7628	18.1736	18.0778	P09603	P09603	CSF1_HUMAN	CSF1	Macrophage colony-stimulating factor 1	P09603	FALSE	0	-0.120017	0.902543	0.391263	0.157445	0.109433	1.8918	FALSE	FALSE	Stable	Stable
CSGALNACT2	17.0856	17.3524	18.0647	18.4553	18.3549	18.5673	Q8N6G5	Q8N6G5	CGAT2_HUMAN	CSGALNACT2	Chondroitin sulfate N-acetylgalactosaminyltransferase 2	Q8N6G5	FALSE	0	0.33904	1.57751	0.958274	0.020092	0.00941334	3.82559	FALSE	FALSE	Up	Stable
CSK	22.9461	22.9251	22.9147	22.9492	22.9224	22.922	P41240	P41240	CSK_HUMAN	CSK	Tyrosine-protein kinase CSK	P41240	FALSE	0	-0.0721387	0.0772927	0.00257698	0.947056	0.934939	0.0852636	FALSE	FALSE	Stable	Stable
CSNK1A1	23.1023	23.0848	23.081	23.1538	23.132	23.1401	P48729	P48729;Q8N752	KC1A_HUMAN	CSNK1A1	Casein kinase I isoform alpha	P48729	FALSE	0	-0.0196736	0.124952	0.0526394	0.175628	0.124105	1.79953	FALSE	FALSE	Stable	Stable
CSNK1D	22.0332	21.8443	21.9905	22.3826	22.4326	22.3945	P48730	P48730	KC1D_HUMAN	CSNK1D	Casein kinase I isoform delta	P48730	FALSE	0	0.306747	0.587691	0.447219	0.00127317	0.000272834	7.87037	FALSE	FALSE	Stable	Stable
CSNK1E	21.3446	20.9859	21.1337	21.0379	20.8729	21.0206	P49674	P48730;P49674	KC1E_HUMAN	CSNK1E	Casein kinase I isoform epsilon	P49674	FALSE	0	-0.427611	0.0724156	-0.177598	0.184531	0.131679	-1.75606	FALSE	FALSE	Stable	Stable
CSNK1G1	20.0848	20.0418	20.4699	19.6893	19.8423	19.7828	Q9HCP0	Q9HCP0	KC1G1_HUMAN	CSNK1G1	Casein kinase I isoform gamma-1	Q9HCP0	FALSE	0	-0.730587	-0.12415	-0.427369	0.0278131	0.0139764	-3.48427	FALSE	FALSE	Stable	Stable
CSNK1G3	21.0673	21.016	21.0525	20.6292	20.6694	20.6314	Q9Y6M4	Q9Y6M4	KC1G3_HUMAN	CSNK1G3	Casein kinase I isoform gamma-3	Q9Y6M4	FALSE	0	-0.483123	-0.320834	-0.401978	0.000244897	2.4334e-05	-12.2464	FALSE	FALSE	Stable	Stable
CSNK2A1	23.3855	23.4179	23.5093	23.8323	23.7634	23.7758	P68400	P68400;Q8NEV1	CSK21_HUMAN	CSNK2A1	Casein kinase II subunit alpha	P68400	FALSE	0	0.240633	0.465283	0.352958	0.00134166	0.000292522	7.76805	FALSE	FALSE	Stable	Stable
CSNK2A2	22.236	22.3055	22.3237	22.4508	22.4684	22.4014	P19784	P19784	CSK22_HUMAN	CSNK2A2	Casein kinase II subunit alpha'	P19784	FALSE	0	0.0537284	0.249823	0.151776	0.0200766	0.00940099	3.82675	FALSE	FALSE	Stable	Stable
CSNK2B	23.4136	23.4105	23.3077	23.5517	23.4986	23.4821	P67870	P67870	CSK2B_HUMAN	CSNK2B	Casein kinase II subunit beta	P67870	FALSE	0	0.0245097	0.242575	0.133542	0.0440384	0.024387	3.02779	FALSE	FALSE	Stable	Stable
CSPG4	23.7678	23.7894	23.7346	22.0373	22.0601	22.0759	Q6UVK1	Q6UVK1	CSPG4_HUMAN	CSPG4	Chondroitin sulfate proteoglycan 4	Q6UVK1	FALSE	0	-1.78669	-1.62564	-1.70616	2.52573e-06	6.18016e-09	-52.3788	TRUE	TRUE	Down	Down
CSRP1	24.1393	24.0689	24.1422	24.0733	24.0885	24.1813	P21291	P21291	CSRP1_HUMAN	CSRP1	Cysteine and glycine-rich protein 1	P21291	FALSE	0	-0.112666	0.107813	-0.0024262	0.965412	0.958449	-0.0544069	FALSE	FALSE	Stable	Stable
CSRP2	22.5562	22.5435	22.4988	21.8919	22.0051	21.928	Q16527	Q16527	CSRP2_HUMAN	CSRP2	Cysteine and glycine-rich protein 2	Q16527	FALSE	0	-0.695513	-0.486778	-0.591145	0.000155036	1.15004e-05	-14.0021	TRUE	TRUE	Down	Down
CSRP3	21.9296	22.4119	22.3676	22.5009	22.4431	22.5152	P50461	P50461	CSRP3_HUMAN	CSRP3	Cysteine and glycine-rich protein 3	P50461	FALSE	0	-0.0778933	0.577952	0.250029	0.158704	0.11047	1.88488	FALSE	FALSE	Stable	Stable
CST3	19.4442	19.5114	19.8417	19.9237	19.8993	19.554	P01034	P01034	CYTC_HUMAN	CST3	Cystatin-C	P01034	FALSE	0	-0.166554	0.553003	0.193224	0.299089	0.234495	1.32767	FALSE	FALSE	Stable	Stable
CSTB	24.4919	24.6223	24.5434	24.4934	24.6392	24.5519	P04080	P04080	CYTB_HUMAN	CSTB	Cystatin-B	P04080	FALSE	0	-0.127382	0.145348	0.00898287	0.89925	0.876204	0.162846	FALSE	FALSE	Stable	Stable
CSTF1	22.8189	22.8093	22.7703	22.9516	22.8982	22.8938	Q05048	Q05048	CSTF1_HUMAN	CSTF1	Cleavage stimulation factor subunit 1	Q05048	FALSE	0	0.0297073	0.200361	0.115034	0.0322562	0.0167533	3.33277	FALSE	FALSE	Stable	Stable
CSTF2	22.8048	22.8031	22.9077	22.9329	23.0094	22.9918	P33240	P33240	CSTF2_HUMAN	CSTF2	Cleavage stimulation factor subunit 2	P33240	FALSE	0	0.028979	0.250091	0.139535	0.0399762	0.021736	3.12007	FALSE	FALSE	Stable	Stable
CSTF2T	21.3444	21.5128	21.4201	21.2276	21.3472	21.3173	Q9H0L4	Q9H0L4	CSTFT_HUMAN	CSTF2T	Cleavage stimulation factor subunit 2 tau variant	Q9H0L4	FALSE	0	-0.271264	0.0145296	-0.128367	0.107849	0.0700013	-2.22073	FALSE	FALSE	Stable	Stable
CSTF3	22.0764	22.1391	22.1694	22.2442	22.1715	22.2309	Q12996	Q12996	CSTF3_HUMAN	CSTF3	Cleavage stimulation factor subunit 3	Q12996	FALSE	0	-0.0136816	0.188093	0.0872056	0.118617	0.0784107	2.13684	FALSE	FALSE	Stable	Stable
CTBP1	22.367	22.3638	22.3799	22.4118	22.3245	22.3104	Q13363	Q13363	CTBP1_HUMAN	CTBP1	C-terminal-binding protein 1	Q13363	FALSE	0	-0.117524	0.0748506	-0.0213365	0.663036	0.604033	-0.548366	FALSE	FALSE	Stable	Stable
CTBP2	23.6994	23.6157	23.6282	23.5262	23.4361	23.4078	P56545	P56545	CTBP2_HUMAN	CTBP2	C-terminal-binding protein 2	P56545	FALSE	0	-0.305819	-0.0763075	-0.191063	0.0156107	0.00682139	-4.11592	FALSE	FALSE	Stable	Stable
CTBS	18.6563	18.1391	18.9781	19.4576	19.3253	18.9476	Q01459	Q01459	DIAC_HUMAN	CTBS	Di-N-acetylchitobiase	Q01459	FALSE	0	0.0543783	1.25026	0.652317	0.0634554	0.0372152	2.69691	FALSE	FALSE	Stable	Stable
CTCF	19.0254	19.0487	19.0551	18.8345	18.9584	18.921	P49711	P49711	CTCF_HUMAN	CTCF	Transcriptional repressor CTCF	P49711	FALSE	0	-0.243004	-0.0338731	-0.138438	0.0342821	0.0180146	-3.2729	FALSE	FALSE	Stable	Stable
CTDNEP1	21.3119	21.3071	21.1959	21.0586	21.0339	21.098	O95476	O95476	CNEP1_HUMAN	CTDNEP1	CTD nuclear envelope phosphatase 1	O95476	FALSE	0	-0.319734	-0.0965376	-0.208136	0.0103081	0.00405606	-4.61056	FALSE	FALSE	Stable	Stable
CTDP1	20.6615	20.704	20.673	20.1825	20.2454	20.3199	Q9Y5B0	Q9Y5B0	CTDP1_HUMAN	CTDP1	RNA polymerase II subunit A C-terminal domain phosphatase	Q9Y5B0	FALSE	0	-0.540955	-0.319572	-0.430263	0.000608897	9.2844e-05	-9.60912	FALSE	FALSE	Stable	Stable
CTDSP1	17.3507	17.0431	17.1672	16.9676	16.713	16.2855	Q9GZU7	O15194;Q9GZU7	CTDS1_HUMAN	CTDSP1	Carboxy-terminal domain RNA polymerase II polypeptide A small phosphatase 1	Q9GZU7	FALSE	0	-0.986509	-0.0767396	-0.531624	0.0510914	0.0290587	-2.88913	FALSE	FALSE	Stable	Stable
CTDSP2	19.163	19.0607	19.1433	18.8751	19.0598	19.007	O14595	O14595	CTDS2_HUMAN	CTDSP2	Carboxy-terminal domain RNA polymerase II polypeptide A small phosphatase 2	O14595	FALSE	0	-0.289478	0.00611521	-0.141682	0.0912258	0.0572966	-2.3698	FALSE	FALSE	Stable	Stable
CTDSPL2	20.4479	20.3966	20.4408	20.0227	19.9398	19.9957	Q05D32	Q05D32	CTSL2_HUMAN	CTDSPL2	CTD small phosphatase-like protein 2	Q05D32	FALSE	0	-0.534541	-0.350152	-0.442346	0.000277342	2.90736e-05	-11.861	FALSE	FALSE	Stable	Stable
CTF1	17.0923	17.1581	17.3369	16.9474	17.1485	17.1021	Q16619	Q16619	CTF1_HUMAN	CTF1	Cardiotrophin-1	Q16619	FALSE	0	-0.337774	0.078137	-0.129819	0.235693	0.175776	-1.54323	FALSE	FALSE	Stable	Stable
CTH	21.2834	21.3338	21.3844	22.7276	22.5762	22.6717	P32929	P32929	CGL_HUMAN	CTH	Cystathionine gamma-lyase	P32929	FALSE	0	1.19506	1.45419	1.32462	2.17572e-05	4.03482e-07	25.273	TRUE	TRUE	Up	Up
CTIF	21.4117	21.3958	21.4049	20.3705	20.2413	20.1844	O43310	O43310	CTIF_HUMAN	CTIF	CBP80/20-dependent translation initiation factor	O43310	FALSE	0	-1.27228	-1.00517	-1.13872	3.99283e-05	1.1364e-06	-21.0772	TRUE	TRUE	Down	Down
CTNNA1	24.0477	24.0618	24.0727	23.888	23.8385	23.8938	P35221	P35221	CTNA1_HUMAN	CTNNA1	Catenin alpha-1	P35221	FALSE	0	-0.267345	-0.107319	-0.187332	0.00427909	0.00134352	-5.78783	FALSE	FALSE	Stable	Stable
CTNNA2	22.6165	22.7295	22.5035	22.4501	22.3963	22.4367	P26232	P26232	CTNA2_HUMAN	CTNNA2	Catenin alpha-2	P26232	FALSE	0	-0.343861	-0.0336746	-0.188768	0.0448692	0.0249742	-3.00884	FALSE	FALSE	Stable	Stable
CTNNAL1	19.7384	19.8492	19.7055	20.3173	20.3077	20.2601	Q9UBT7	Q9UBT7	CTNL1_HUMAN	CTNNAL1	Alpha-catulin	Q9UBT7	FALSE	0	0.411433	0.649966	0.5307	0.000367888	4.4156e-05	11	TRUE	TRUE	Up	Up
CTNNB1	22.8524	22.8939	22.9151	22.6941	22.6277	22.6005	P35222	P35222	CTNB1_HUMAN	CTNNB1	Catenin beta-1	P35222	FALSE	0	-0.344347	-0.148466	-0.246407	0.00322712	0.000933434	-6.21949	FALSE	FALSE	Stable	Stable
CTNNBL1	23.3677	23.3057	23.3136	23.3035	23.3556	23.3563	Q8WYA6	Q8WYA6	CTBL1_HUMAN	CTNNBL1	Beta-catenin-like protein 1	Q8WYA6	FALSE	0	-0.0788094	0.0977057	0.00944812	0.837498	0.800503	0.264641	FALSE	FALSE	Stable	Stable
CTNND1	23.5882	23.59	23.6638	23.2097	23.2835	23.2753	O60716	O60716	CTND1_HUMAN	CTNND1	Catenin delta-1	O60716	FALSE	0	-0.456968	-0.258698	-0.357833	0.000798763	0.000138925	-8.92313	FALSE	FALSE	Stable	Stable
CTPS1	24.953	24.951	24.9466	25.3888	25.3522	25.3521	P17812	P17812;Q9NRF8	PYRG1_HUMAN	CTPS1	CTP synthase 1	P17812	FALSE	0	0.339819	0.488498	0.414159	0.000162285	1.26185e-05	13.7725	FALSE	FALSE	Stable	Stable
CTPS2	21.6043	21.7525	21.7213	22.0243	22.1754	22.1692	Q9NRF8	Q9NRF8	PYRG2_HUMAN	CTPS2	CTP synthase 2	Q9NRF8	FALSE	0	0.275793	0.584753	0.430273	0.00215893	0.000552175	6.88552	FALSE	FALSE	Stable	Stable
CTR9	24.4994	24.4643	24.5645	24.4478	24.2468	24.3458	Q6PD62	Q6PD62	CTR9_HUMAN	CTR9	RNA polymerase-associated protein CTR9 homolog	Q6PD62	FALSE	0	-0.313695	-0.0115266	-0.162611	0.0659404	0.0390122	-2.66069	FALSE	FALSE	Stable	Stable
CTSA	22.7596	22.8021	22.6525	22.985	22.9987	23.164	P10619	P10619	PPGB_HUMAN	CTSA	Lysosomal protective protein	P10619	FALSE	0	0.145811	0.47644	0.311126	0.00995554	0.00388734	4.65252	FALSE	FALSE	Stable	Stable
CTSB	25.9046	25.8505	25.8753	26.063	26.0264	26.0559	P07858	P07858	CATB_HUMAN	CTSB	Cathepsin B	P07858	FALSE	0	0.0913805	0.251933	0.171657	0.00611643	0.00210629	5.28614	FALSE	FALSE	Stable	Stable
CTSC	22.9364	22.8605	22.8707	22.8592	22.8746	22.8417	P53634	P53634	CATC_HUMAN	CTSC	Dipeptidyl peptidase 1	P53634	FALSE	0	-0.118256	0.0568485	-0.0307038	0.491749	0.42063	-0.866939	FALSE	FALSE	Stable	Stable
CTSD	25.1675	25.2359	25.1578	25.4942	25.3403	25.3717	P07339	P07339	CATD_HUMAN	CTSD	Cathepsin D	P07339	FALSE	0	0.0854229	0.344637	0.21503	0.0157756	0.00692987	4.10142	FALSE	FALSE	Stable	Stable
CTSF	19.2795	19.3122	19.3769	18.6741	17.8106	18.7414	Q9UBX1	Q9UBX1	CATF_HUMAN	CTSF	Cathepsin F	Q9UBX1	FALSE	0	-1.53833	-0.28993	-0.914129	0.0244208	0.0119132	-3.62033	FALSE	FALSE	Stable	Stable
CTSS	18.0134	17.9973	17.2882	18.8293	18.4404	19.0975	P25774	P25774	CATS_HUMAN	CTSS	Cathepsin S	P25774	FALSE	0	0.388686	1.65682	1.02275	0.0174085	0.00785343	3.98749	FALSE	FALSE	Up	Stable
CTSV	19.1086	19.0865	18.9858	18.9821	18.9696	19.3162	O60911	O60911	CATL2_HUMAN	CTSV	Cathepsin L2	O60911	FALSE	0	-0.2272	0.285277	0.0290385	0.827741	0.789152	0.280152	FALSE	FALSE	Stable	Stable
CTSZ	24.1828	24.191	24.157	24.3005	24.272	24.2439	Q9UBR2	Q9UBR2	CATZ_HUMAN	CTSZ	Cathepsin Z	Q9UBR2	FALSE	0	0.0147889	0.175501	0.0951447	0.0490689	0.0276909	2.92706	FALSE	FALSE	Stable	Stable
CTTN	24.3553	24.4913	24.4117	24.5083	24.6149	24.582	Q14247	Q14247	SRC8_HUMAN	CTTN	Src substrate cortactin	Q14247	FALSE	0	0.0236359	0.274244	0.14894	0.0484906	0.0272959	2.93839	FALSE	FALSE	Stable	Stable
CTTNBP2NL	20.9962	21.0144	20.9322	20.8927	20.9957	20.9457	Q9P2B4	Q9P2B4	CT2NL_HUMAN	CTTNBP2NL	CTTNBP2 N-terminal-like protein	Q9P2B4	FALSE	0	-0.142396	0.0699088	-0.0362434	0.503129	0.432308	-0.844042	FALSE	FALSE	Stable	Stable
CTU1	19.5306	19.5821	19.6998	20.009	20.0743	20.0027	Q7Z7A3	Q7Z7A3	CTU1_HUMAN	CTU1	Cytoplasmic tRNA 2-thiolation protein 1	Q7Z7A3	FALSE	0	0.291243	0.557719	0.424481	0.00126926	0.000271832	7.8758	FALSE	FALSE	Stable	Stable
CTU2	19.6464	19.2982	19.2949	20.0857	19.8308	20.0207	Q2VPK5	Q2VPK5	CTU2_HUMAN	CTU2	Cytoplasmic tRNA 2-thiolation protein 2	Q2VPK5	FALSE	0	0.270141	0.861624	0.565883	0.00931924	0.00359568	4.73018	TRUE	TRUE	Up	Up
CUEDC1	19.6923	19.6847	19.6695	19.6118	19.7663	19.7869	Q9NWM3	Q9NWM3	CUED1_HUMAN	CUEDC1	CUE domain-containing protein 1	Q9NWM3	FALSE	0	-0.0947822	0.173744	0.039481	0.563363	0.495745	0.726934	FALSE	FALSE	Stable	Stable
CUEDC2	20.6138	20.6806	20.6169	20.3716	20.4843	20.3445	Q9H467	Q9H467	CUED2_HUMAN	CUEDC2	CUE domain-containing protein 2	Q9H467	FALSE	0	-0.358031	-0.115846	-0.236938	0.0085856	0.00323411	-4.83706	FALSE	FALSE	Stable	Stable
CUL1	21.8294	21.7279	21.7272	21.9739	21.9239	21.9141	Q13616	Q13616	CUL1_HUMAN	CUL1	Cullin-1	Q13616	FALSE	0	0.0699002	0.281809	0.175855	0.0157631	0.00691816	4.10297	FALSE	FALSE	Stable	Stable
CUL2	23.5333	23.5037	23.523	23.6453	23.5464	23.5978	Q13617	Q13617	CUL2_HUMAN	CUL2	Cullin-2	Q13617	FALSE	0	-0.0165595	0.169514	0.0764773	0.133674	0.0903959	2.03209	FALSE	FALSE	Stable	Stable
CUL3	22.5847	22.5887	22.6339	22.285	22.1938	22.2163	Q13618	Q13618	CUL3_HUMAN	CUL3	Cullin-3	Q13618	FALSE	0	-0.46624	-0.275157	-0.370699	0.000611873	9.37707e-05	-9.59166	FALSE	FALSE	Stable	Stable
CUL4A	21.8824	21.9871	21.8735	21.8708	21.7807	21.9277	Q13619	Q13619	CUL4A_HUMAN	CUL4A	Cullin-4A	Q13619	FALSE	0	-0.189829	0.0806761	-0.0545765	0.428614	0.358567	-0.997526	FALSE	FALSE	Stable	Stable
CUL4B	23.5226	23.4832	23.5641	23.3428	23.2836	23.2478	Q13620	Q13620	CUL4B_HUMAN	CUL4B	Cullin-4B	Q13620	FALSE	0	-0.334108	-0.129649	-0.231878	0.00484301	0.00157421	-5.60723	FALSE	FALSE	Stable	Stable
CUL5	21.8423	21.7838	21.8308	21.8035	21.7639	21.7711	Q93034	Q93034	CUL5_HUMAN	CUL5	Cullin-5	Q93034	FALSE	0	-0.12232	0.0434149	-0.0394524	0.354371	0.285571	-1.17694	FALSE	FALSE	Stable	Stable
CUL7	20.6836	20.6846	20.5747	19.843	19.7993	19.9841	Q14999	Q14999	CUL7_HUMAN	CUL7	Cullin-7	Q14999	FALSE	0	-0.926177	-0.618128	-0.772152	0.000235449	2.27717e-05	-12.393	TRUE	TRUE	Down	Down
CUL9	18.4888	18.3941	18.4139	17.8897	17.9059	17.8977	Q8IWT3	Q8IWT3	CUL9_HUMAN	CUL9	Cullin-9	Q8IWT3	FALSE	0	-0.62668	-0.442291	-0.534486	0.000141686	1.00916e-05	-14.3316	TRUE	TRUE	Down	Down
CUSTOS	19.7258	19.5734	19.5565	19.7437	20.0256	19.8521	Q96C57	Q96C57	CSTOS_HUMAN	CUSTOS	Protein CUSTOS	Q96C57	FALSE	0	0.0412105	0.469236	0.255223	0.0479961	0.0269619	2.94812	FALSE	FALSE	Stable	Stable
CUTA	21.1118	21.1533	21.1569	21.4058	21.2777	21.4066	O60888	O60888	CUTA_HUMAN	CUTA	Protein CutA	O60888	FALSE	0	0.106217	0.33917	0.222693	0.00934489	0.00360919	4.72643	FALSE	FALSE	Stable	Stable
CUTC	22.3128	22.2238	22.1241	22.626	22.4156	22.5964	Q9NTM9	Q9NTM9	CUTC_HUMAN	CUTC	Copper homeostasis protein cutC homolog	Q9NTM9	FALSE	0	0.136448	0.515105	0.325776	0.0138637	0.00588061	4.2537	FALSE	FALSE	Stable	Stable
CUX1	20.2438	20.2976	20.203	19.6234	19.7151	19.3561	P39880	P39880	CUX1_HUMAN	CUX1	Homeobox protein cut-like 1	P39880	FALSE	0	-0.922627	-0.443889	-0.683258	0.00196169	0.000485813	-7.05635	TRUE	TRUE	Down	Down
CUX1.1	20.3678	20.4122	20.4074	20.2476	20.2478	20.1245	Q13948	Q13948	CASP_HUMAN	CUX1	Protein CASP	Q13948	FALSE	0	-0.302576	-0.0757123	-0.189144	0.0155242	0.00677545	-4.12213	FALSE	FALSE	Stable	Stable
CWC15	21.4318	21.7083	21.7305	21.667	21.8188	21.817	Q9P013	Q9P013	CWC15_HUMAN	CWC15	Spliceosome-associated protein CWC15 homolog	Q9P013	FALSE	0	-0.0900486	0.378173	0.144062	0.241568	0.181071	1.52122	FALSE	FALSE	Stable	Stable
CWC22	20.4773	20.4615	20.5136	20.3412	20.2724	20.3836	Q9HCG8	Q9HCG8	CWC22_HUMAN	CWC22	Pre-mRNA-splicing factor CWC22 homolog	Q9HCG8	FALSE	0	-0.253405	-0.0500812	-0.151743	0.0228442	0.0109911	-3.6899	FALSE	FALSE	Stable	Stable
CWC25	19.6109	19.614	19.6816	19.8652	19.7048	19.8798	Q9NXE8	Q9NXE8	CWC25_HUMAN	CWC25	Pre-mRNA-splicing factor CWC25 homolog	Q9NXE8	FALSE	0	0.0379765	0.324193	0.181085	0.0396588	0.0215206	3.1281	FALSE	FALSE	Stable	Stable
CWC27	21.925	22.0149	21.9387	21.3451	21.4923	21.3927	Q6UX04	Q6UX04	CWC27_HUMAN	CWC27	Spliceosome-associated protein CWC27 homolog	Q6UX04	FALSE	0	-0.676677	-0.422281	-0.549479	0.000411933	5.20002e-05	-10.6791	TRUE	TRUE	Down	Down
CWF19L1	21.747	21.7128	21.8254	21.7642	21.7633	21.7714	Q69YN2	Q69YN2	C19L1_HUMAN	CWF19L1	CWF19-like protein 1	Q69YN2	FALSE	0	-0.0934554	0.102711	0.00462785	0.92747	0.911107	0.11664	FALSE	FALSE	Stable	Stable
CWF19L2	18.3967	18.4753	18.4435	18.1141	18.0123	18.4139	Q2TBE0	Q2TBE0	C19L2_HUMAN	CWF19L2	CWF19-like protein 2	Q2TBE0	FALSE	0	-0.520592	0.00389708	-0.258348	0.0847012	0.0525006	-2.43535	FALSE	FALSE	Stable	Stable
CXADR	20.4625	20.6943	20.7009	21.1594	21.2886	21.1409	P78310	P78310	CXAR_HUMAN	CXADR	Coxsackievirus and adenovirus receptor	P78310	FALSE	0	0.376716	0.777389	0.577053	0.00189727	0.000463262	7.12064	TRUE	TRUE	Up	Up
CXorf38	22.3849	22.2423	22.2638	21.4023	21.3261	21.2076	Q8TB03	Q8TB03	CX038_HUMAN	CXorf38	Uncharacterized protein CXorf38	Q8TB03	FALSE	0	-1.14886	-0.821084	-0.984971	0.000123759	8.23997e-06	-14.8574	TRUE	TRUE	Down	Down
CXXC1	20.0136	20.1031	20.102	19.8161	19.9691	19.937	Q9P0U4	Q9P0U4	CXXC1_HUMAN	CXXC1	CXXC-type zinc finger protein 1	Q9P0U4	FALSE	0	-0.299044	-0.032026	-0.165535	0.0422862	0.0232751	-3.06509	FALSE	FALSE	Stable	Stable
CXXC5	19.2777	19.4513	19.4976	17.6534	18.5376	18.6352	Q7LFL8	Q7LFL8	CXXC5_HUMAN	CXXC5	CXXC-type zinc finger protein 5	Q7LFL8	FALSE	0	-1.79518	-0.47171	-1.13345	0.0140889	0.00600388	-4.23428	FALSE	FALSE	Down	Stable
CYB5A	20.5277	20.408	20.3257	19.2506	19.0593	18.9833	P00167	P00167	CYB5_HUMAN	CYB5A	Cytochrome b5	P00167	FALSE	0	-1.53797	-1.10752	-1.32275	0.000114493	7.26569e-06	-15.1931	TRUE	TRUE	Down	Down
CYB5B	22.7795	22.4926	22.6071	22.9062	22.9686	23.1389	O43169	O43169	CYB5B_HUMAN	CYB5B	Cytochrome b5 type B	O43169	FALSE	0	0.143786	0.612555	0.378171	0.0173966	0.0078436	3.98862	FALSE	FALSE	Stable	Stable
CYB5R1	22.8529	22.9001	22.8752	22.8716	23.0055	22.9293	Q9UHQ9	Q9UHQ9	NB5R1_HUMAN	CYB5R1	NADH-cytochrome b5 reductase 1	Q9UHQ9	FALSE	0	-0.0503649	0.169163	0.0593991	0.295761	0.231381	1.33778	FALSE	FALSE	Stable	Stable
CYB5R3	24.9662	25.0824	24.9211	25.0371	24.9851	25.0363	P00387	P00387	NB5R3_HUMAN	CYB5R3	NADH-cytochrome b5 reductase 3	P00387	FALSE	0	-0.0966372	0.15579	0.0295766	0.645044	0.584319	0.579303	FALSE	FALSE	Stable	Stable
CYB5R4	16.6614	17.2324	17.4214	17.2356	17.3259	17.0277	Q7L1T6	Q7L1T6	NB5R4_HUMAN	CYB5R4	Cytochrome b5 reductase 4	Q7L1T6	FALSE	0	-0.418183	0.600783	0.0913002	0.726805	0.673921	0.443002	FALSE	FALSE	Stable	Stable
CYBA	16.3098	15.978	15.9067	19.3355	19.3373	19.1846	P13498	P13498	CY24A_HUMAN	CYBA	Cytochrome b-245 light chain	P13498	TRUE	3	2.93594	3.50597	3.22095	1.49587e-05	2.27514e-07	27.9369	TRUE	TRUE	Up	Up
CYBC1	19.2254	19.3052	19.0649	19.7242	19.6354	19.1325	Q9BQA9	Q9BQA9	CYBC1_HUMAN	CYBC1	Cytochrome b-245 chaperone 1	Q9BQA9	FALSE	0	-0.113657	0.711405	0.298874	0.17713	0.125556	1.791	FALSE	FALSE	Stable	Stable
CYBRD1	22.795	22.8047	22.7644	22.2486	22.2724	22.3484	Q53TN4	Q53TN4	CYBR1_HUMAN	CYBRD1	Plasma membrane ascorbate-dependent reductase CYBRD1	Q53TN4	FALSE	0	-0.594863	-0.401531	-0.498197	0.000213203	1.9514e-05	-12.7406	FALSE	FALSE	Stable	Stable
CYC1	23.4162	23.4026	23.4315	23.3065	23.3907	23.3778	P08574	P08574	CY1_HUMAN	CYC1	Cytochrome c1, heme protein, mitochondrial	P08574	FALSE	0	-0.148311	0.0314825	-0.0584144	0.219095	0.161394	-1.60635	FALSE	FALSE	Stable	Stable
CYCS	24.7177	24.7222	24.759	24.7548	24.8183	24.7898	P99999	P99999;Cont_P00004;Cont_P62894	CYC_HUMAN	CYCS	Cytochrome c	P99999	FALSE	0	-0.0292108	0.138569	0.0546789	0.217821	0.160315	1.61129	FALSE	FALSE	Stable	Stable
CYFIP1	23.7334	23.6834	23.7324	23.4433	23.3622	23.3877	Q7L576	Q7L576	CYFP1_HUMAN	CYFIP1	Cytoplasmic FMR1-interacting protein 1	Q7L576	FALSE	0	-0.410713	-0.226648	-0.31868	0.000919201	0.000173897	-8.56008	FALSE	FALSE	Stable	Stable
CYFIP2	18.5373	18.5643	18.7199	18.1716	18.0927	18.0894	Q96F07	Q96F07	CYFP2_HUMAN	CYFIP2	Cytoplasmic FMR1-interacting protein 2	Q96F07	FALSE	0	-0.636555	-0.342003	-0.489279	0.00107762	0.000217278	-8.21277	FALSE	FALSE	Stable	Stable
CYGB	17.4626	16.2585	17.2084	19.7457	19.7303	19.5934	Q8WWM9	Q8WWM9	CYGB_HUMAN	CYGB	Cytoglobin	Q8WWM9	TRUE	1	1.9485	3.47802	2.71326	0.000849175	0.000152513	8.77064	TRUE	TRUE	Up	Up
CYLD	20.0245	20.0412	19.8783	20.3133	20.1701	20.297	Q9NQC7	Q9NQC7	CYLD_HUMAN	CYLD	Ubiquitin carboxyl-terminal hydrolase CYLD	Q9NQC7	FALSE	0	0.120882	0.436786	0.278834	0.012634	0.00523255	4.36399	FALSE	FALSE	Stable	Stable
CYP1B1	20.5462	20.7151	20.7201	16.1096	16.1475	16.0841	Q16678	Q16678	CP1B1_HUMAN	CYP1B1	Cytochrome P450 1B1	Q16678	TRUE	3	-4.68878	-4.40462	-4.5467	8.94474e-07	5.77093e-10	-79.109	TRUE	TRUE	Down	Down
CYP20A1	20.6972	20.7981	20.9145	20.5092	20.4689	20.4371	Q6UW02	Q6UW02	CP20A_HUMAN	CYP20A1	Cytochrome P450 20A1	Q6UW02	FALSE	0	-0.48472	-0.178388	-0.331554	0.00583403	0.00198349	-5.35127	FALSE	FALSE	Stable	Stable
CYP27A1	21.2527	21.1714	21.3178	21.1374	21.1331	21.1258	Q02318	Q02318	CP27A_HUMAN	CYP27A1	Sterol 26-hydroxylase, mitochondrial	Q02318	FALSE	0	-0.227157	-0.00323365	-0.115195	0.0751631	0.0454947	-2.54349	FALSE	FALSE	Stable	Stable
CYP2S1	18.8941	18.7681	19.0366	16.3304	16.2608	16.0041	Q96SQ9	Q96SQ9	CP2S1_HUMAN	CYP2S1	Cytochrome P450 2S1	Q96SQ9	TRUE	3	-2.96994	-2.4324	-2.70117	2.30302e-05	4.44886e-07	-24.8445	TRUE	TRUE	Down	Down
CYP2U1	16.7362	17.0969	16.7019	16.539	17.2487	17.52	Q7Z449	Q7Z449	CP2U1_HUMAN	CYP2U1	Cytochrome P450 2U1	Q7Z449	FALSE	0	-0.40259	0.917688	0.257549	0.443929	0.373552	0.964469	FALSE	FALSE	Stable	Stable
CYP4F22	16.7623	17.0803	17.3458	17.71	17.4918	17.1358	Q6NT55	Q6NT55	CP4FN_HUMAN	CYP4F22	Ultra-long-chain fatty acid omega-hydroxylase	Q6NT55	FALSE	0	-0.111426	0.877627	0.3831	0.153209	0.106013	1.91508	FALSE	FALSE	Stable	Stable
CYP51A1	22.0912	21.9522	21.9471	22.0458	21.9992	22.0433	Q16850	Q16850	CP51A_HUMAN	CYP51A1	Lanosterol 14-alpha demethylase	Q16850	FALSE	0	-0.0911118	0.156382	0.0326352	0.604165	0.539567	0.651952	FALSE	FALSE	Stable	Stable
CYRIA	16.2545	15.8788	16.2514	16.2925	16.5442	16.4572	Q9H0Q0	Q9H0Q0	CYRIA_HUMAN	CYRIA	CYFIP-related Rac1 interactor A	Q9H0Q0	TRUE	3	-0.00356213	0.609771	0.303105	0.0839769	0.0519435	2.44337	FALSE	FALSE	Stable	Stable
CYRIB	24.3217	24.4767	24.5177	24.8948	24.9782	24.9354	Q9NUQ9	Q9NUQ9;Q9H0Q0	CYRIB_HUMAN	CYRIB	CYFIP-related Rac1 interactor B	Q9NUQ9	FALSE	0	0.347564	0.64727	0.497417	0.00108094	0.000218276	8.20576	FALSE	FALSE	Stable	Stable
CYSTM1	19.833	19.8104	19.6471	20.7031	20.462	20.5891	Q9H1C7	Q9H1C7	CYTM1_HUMAN	CYSTM1	Cysteine-rich and transmembrane domain-containing protein 1	Q9H1C7	FALSE	0	0.621137	1.02128	0.821211	0.000495861	6.89033e-05	10.1468	TRUE	TRUE	Up	Up
CYTH1	18.2426	18.2641	18.3017	18.866	19.0284	19.0614	Q15438	Q15438	CYH1_HUMAN	CYTH1	Cytohesin-1	Q15438	FALSE	0	0.568691	0.862822	0.715756	0.0002643	2.68554e-05	12.0314	TRUE	TRUE	Up	Up
CYTH3	22.6603	22.6138	22.7384	22.2887	22.2415	22.3579	O43739	O43739	CYH3_HUMAN	CYTH3	Cytohesin-3	O43739	FALSE	0	-0.498631	-0.250981	-0.374806	0.00156506	0.00035675	-7.48274	FALSE	FALSE	Stable	Stable
CZIB	21.58	22.0177	21.8113	21.6757	21.7213	21.7986	Q9NWV4	Q9NWV4	CZIB_HUMAN	CZIB	CXXC motif containing zinc binding protein	Q9NWV4	FALSE	0	-0.350726	0.20854	-0.0710929	0.617205	0.553775	-0.628495	FALSE	FALSE	Stable	Stable
D2HGDH	18.3477	18.5232	18.5048	18.763	18.6091	18.5911	Q8N465	Q8N465	D2HDH_HUMAN	D2HGDH	D-2-hydroxyglutarate dehydrogenase, mitochondrial	Q8N465	FALSE	0	0.0206959	0.370951	0.195824	0.0586972	0.0341071	2.76423	FALSE	FALSE	Stable	Stable
DAAM1	18.3012	18.2459	18.3595	17.4344	17.7562	17.6255	Q9Y4D1	Q9Y4D1	DAAM1_HUMAN	DAAM1	Disheveled-associated activator of morphogenesis 1	Q9Y4D1	FALSE	0	-0.912542	-0.481182	-0.696862	0.00120431	0.000252183	-7.98732	TRUE	TRUE	Down	Down
DAB2	21.8581	21.9353	21.82	21.5702	21.6652	21.6479	P98082	P98082	DAB2_HUMAN	DAB2	Disabled homolog 2	P98082	FALSE	0	-0.359065	-0.127685	-0.243375	0.00651728	0.00228126	-5.20048	FALSE	FALSE	Stable	Stable
DAD1	23.8807	24.0578	23.9588	24.2111	23.991	24.1911	P61803	P61803	DAD1_HUMAN	DAD1	Dolichyl-diphosphooligosaccharide--protein glycosyltransferase subunit DAD1	P61803	FALSE	0	-0.0270479	0.357672	0.165312	0.120245	0.0797349	2.12449	FALSE	FALSE	Stable	Stable
DAG1	22.4132	22.4725	22.4904	22.3304	22.3813	22.3408	Q14118	Q14118	DAG1_HUMAN	DAG1	Dystroglycan 1	Q14118	FALSE	0	-0.198426	-0.0172484	-0.107837	0.0482771	0.0271446	-2.94278	FALSE	FALSE	Stable	Stable
DAGLB	22.3524	22.4047	22.4283	21.9922	21.9153	21.851	Q8NCG7	Q8NCG7	DGLB_HUMAN	DAGLB	Diacylglycerol lipase-beta	Q8NCG7	FALSE	0	-0.594305	-0.356943	-0.475624	0.000542711	7.85585e-05	-9.90708	FALSE	FALSE	Stable	Stable
DAP	16.0939	16.1579	16.0956	16.3818	15.9308	17.0371	P51397	P51397	DAP1_HUMAN	DAP	Death-associated protein 1	P51397	TRUE	2	-0.332755	1.00094	0.334094	0.33065	0.263626	1.23853	FALSE	FALSE	Stable	Stable
DAP3	22.77	22.6462	22.7405	22.9415	22.9768	23.0155	P51398	P51398	RT29_HUMAN	DAP3	28S ribosomal protein S29, mitochondrial	P51398	FALSE	0	0.146154	0.371896	0.259025	0.00464252	0.00148513	5.67313	FALSE	FALSE	Stable	Stable
DAPK1	19.8852	19.5399	19.7772	19.4913	19.6189	19.328	P53355	P53355	DAPK1_HUMAN	DAPK1	Death-associated protein kinase 1	P53355	FALSE	0	-0.53596	0.0266406	-0.25466	0.105832	0.0683923	-2.23797	FALSE	FALSE	Stable	Stable
DAPK3	21.7254	21.7793	21.8051	21.724	21.6705	21.6953	O43293	O43293	DAPK3_HUMAN	DAPK3	Death-associated protein kinase 3	O43293	FALSE	0	-0.164119	0.0173668	-0.0733759	0.138995	0.0945631	-1.99897	FALSE	FALSE	Stable	Stable
DARS1	24.0769	24.0587	24.0522	24.0578	24.0152	24.0074	P14868	P14868	SYDC_HUMAN	DARS1	Aspartate--tRNA ligase, cytoplasmic	P14868	FALSE	0	-0.114198	0.0426065	-0.0357956	0.373097	0.303859	-1.12867	FALSE	FALSE	Stable	Stable
DARS2	22.672	22.7127	22.6128	22.7398	22.8277	22.6833	Q6PI48	Q6PI48	SYDM_HUMAN	DARS2	Aspartate--tRNA ligase, mitochondrial	Q6PI48	FALSE	0	-0.0417984	0.210713	0.0844575	0.207648	0.151357	1.65368	FALSE	FALSE	Stable	Stable
DAXX	19.9951	19.9389	20.0558	19.8148	20.0422	20.0493	Q9UER7	Q9UER7	DAXX_HUMAN	DAXX	Death domain-associated protein 6	Q9UER7	FALSE	0	-0.214605	0.158962	-0.0278214	0.772951	0.725867	-0.368218	FALSE	FALSE	Stable	Stable
DAZAP1	21.2993	21.7225	21.5821	21.694	21.7425	21.7839	Q96EP5	Q96EP5	DAZP1_HUMAN	DAZAP1	DAZ-associated protein 1	Q96EP5	FALSE	0	-0.0655914	0.476567	0.205488	0.160823	0.112131	1.87393	FALSE	FALSE	Stable	Stable
DBI	24.1741	24.2408	24.4397	23.9866	23.9773	24.1723	P07108	P07108	ACBP_HUMAN	DBI	Acyl-CoA-binding protein	P07108	FALSE	0	-0.460856	-0.0180766	-0.239466	0.0649955	0.0383444	-2.67394	FALSE	FALSE	Stable	Stable
DBN1	25.3778	25.4604	25.4237	25.3919	25.4207	25.4003	Q16643	Q16643	DREB_HUMAN	DBN1	Drebrin	Q16643	FALSE	0	-0.103537	0.0708863	-0.0163251	0.715126	0.660513	-0.462751	FALSE	FALSE	Stable	Stable
DBNL	23.6154	23.6775	23.6541	23.5953	23.7087	23.6632	Q9UJU6	Q9UJU6	DBNL_HUMAN	DBNL	Drebrin-like protein	Q9UJU6	FALSE	0	-0.0975958	0.11101	0.00670699	0.901296	0.879127	0.158963	FALSE	FALSE	Stable	Stable
DBR1	22.086	21.9524	22.0143	22.2313	22.1527	22.0766	Q9UK59	Q9UK59	DBR1_HUMAN	DBR1	Lariat debranching enzyme	Q9UK59	FALSE	0	-0.00427036	0.276211	0.13597	0.0884472	0.0552667	2.39681	FALSE	FALSE	Stable	Stable
DBT	21.0803	20.9451	21.0649	21.0373	20.9993	21.0709	P11182	P11182	ODB2_HUMAN	DBT	Lipoamide acyltransferase component of branched-chain alpha-keto acid dehydrogenase complex, mitochondrial	P11182	FALSE	0	-0.114501	0.125863	0.00568127	0.927421	0.910939	0.116861	FALSE	FALSE	Stable	Stable
DCAF1	20.1862	20.2546	20.259	20.7309	20.5412	20.7027	Q9Y4B6	Q9Y4B6	DCAF1_HUMAN	DCAF1	DDB1- and CUL4-associated factor 1	Q9Y4B6	FALSE	0	0.276459	0.573471	0.424965	0.00194612	0.000479451	7.07413	FALSE	FALSE	Stable	Stable
DCAF10	18.812	18.939	16.3322	18.5474	18.4702	18.6765	Q5QP82	Q5QP82	DCA10_HUMAN	DCAF10	DDB1- and CUL4-associated factor 10	Q5QP82	TRUE	1	-1.21723	2.29115	0.536962	0.547494	0.47903	0.756711	FALSE	FALSE	Stable	Stable
DCAF11	19.7578	19.7625	19.6446	19.6761	19.6505	19.7368	Q8TEB1	Q8TEB1	DCA11_HUMAN	DCAF11	DDB1- and CUL4-associated factor 11	Q8TEB1	FALSE	0	-0.152032	0.0843617	-0.0338353	0.573962	0.506772	-0.707665	FALSE	FALSE	Stable	Stable
DCAF13	20.3966	20.3855	20.3521	20.6984	20.8079	20.7178	Q9NV06	Q9NV06	DCA13_HUMAN	DCAF13	DDB1- and CUL4-associated factor 13	Q9NV06	FALSE	0	0.261067	0.465598	0.363333	0.000844355	0.000151364	8.78291	FALSE	FALSE	Stable	Stable
DCAF15	20.6068	20.5535	20.5201	20.284	20.6592	20.3657	Q66K64	Q66K64	DCA15_HUMAN	DCAF15	DDB1- and CUL4-associated factor 15	Q66K64	FALSE	0	-0.374133	0.12654	-0.123796	0.336543	0.269191	-1.2225	FALSE	FALSE	Stable	Stable
DCAF16	20.8109	20.6509	20.7454	20.7411	20.8845	20.9695	Q9NXF7	Q9NXF7	DCA16_HUMAN	DCAF16	DDB1- and CUL4-associated factor 16	Q9NXF7	FALSE	0	-0.0520453	0.310681	0.129318	0.183039	0.130496	1.76268	FALSE	FALSE	Stable	Stable
DCAF5	19.015	18.9547	18.9476	19.051	19.1004	18.9235	Q96JK2	Q96JK2	DCAF5_HUMAN	DCAF5	DDB1- and CUL4-associated factor 5	Q96JK2	FALSE	0	-0.0839087	0.188914	0.0525025	0.449878	0.37958	0.951467	FALSE	FALSE	Stable	Stable
DCAF6	20.6905	20.4223	20.3963	19.9479	19.8526	19.7725	Q58WW2	Q58WW2	DCAF6_HUMAN	DCAF6	DDB1- and CUL4-associated factor 6	Q58WW2	FALSE	0	-0.876285	-0.414465	-0.645375	0.00212837	0.000542343	-6.90929	TRUE	TRUE	Down	Down
DCAF7	20.0528	20.6107	20.3136	20.2284	20.1656	20.2073	P61962	P61962	DCAF7_HUMAN	DCAF7	DDB1- and CUL4-associated factor 7	P61962	FALSE	0	-0.466704	0.216152	-0.125276	0.472127	0.400745	-0.907053	FALSE	FALSE	Stable	Stable
DCAF8	20.5202	20.4369	20.5197	20.4138	20.4472	20.4358	Q5TAQ9	Q5TAQ9	DCAF8_HUMAN	DCAF8	DDB1- and CUL4-associated factor 8	Q5TAQ9	FALSE	0	-0.152382	0.0324174	-0.0599822	0.219426	0.161736	-1.60478	FALSE	FALSE	Stable	Stable
DCAKD	22.1008	22.1659	22.1978	22.0974	22.0867	22.1502	Q8WVC6	Q8WVC6	DCAKD_HUMAN	DCAKD	Dephospho-CoA kinase domain-containing protein	Q8WVC6	FALSE	0	-0.143217	0.0564739	-0.0433714	0.395748	0.325823	-1.07384	FALSE	FALSE	Stable	Stable
DCBLD1	18.2264	18.0097	18.2822	18.0644	18.3673	18.3869	Q8N8Z6	Q8N8Z6	DCBD1_HUMAN	DCBLD1	Discoidin, CUB and LCCL domain-containing protein 1	Q8N8Z6	FALSE	0	-0.183546	0.383735	0.100094	0.489136	0.417891	0.872378	FALSE	FALSE	Stable	Stable
DCBLD2	21.947	21.9912	21.9295	21.757	21.5846	21.6678	Q96PD2	Q96PD2	DCBD2_HUMAN	DCBLD2	Discoidin, CUB and LCCL domain-containing protein 2	Q96PD2	FALSE	0	-0.415827	-0.156455	-0.286141	0.00540836	0.00180534	-5.45446	FALSE	FALSE	Stable	Stable
DCK	20.8528	21.0889	20.9919	20.9622	20.917	20.9404	P27707	P27707	DCK_HUMAN	DCK	Deoxycytidine kinase	P27707	FALSE	0	-0.197783	0.121743	-0.0380197	0.639434	0.578661	-0.588296	FALSE	FALSE	Stable	Stable
DCLK1	19.3524	19.2418	19.2273	16.2686	16.813	16.7611	O15075	O15075	DCLK1_HUMAN	DCLK1	Serine/threonine-protein kinase DCLK1	O15075	TRUE	1	-3.03281	-2.28643	-2.65962	7.02109e-05	3.14661e-06	-17.6178	TRUE	TRUE	Down	Down
DCP1A	20.8596	20.7325	20.6499	21.1415	21.0661	21.2276	Q9NPI6	Q9NPI6	DCP1A_HUMAN	DCP1A	mRNA-decapping enzyme 1A	Q9NPI6	FALSE	0	0.224799	0.570665	0.397732	0.00460668	0.00146892	5.68561	FALSE	FALSE	Stable	Stable
DCP2	19.0082	19.0695	18.8117	18.9838	18.9648	19.0567	Q8IU60	Q8IU60	DCP2_HUMAN	DCP2	m7GpppN-mRNA hydrolase	Q8IU60	FALSE	0	-0.145419	0.222718	0.0386495	0.680349	0.623047	0.519072	FALSE	FALSE	Stable	Stable
DCPS	17.1557	17.234	17.1704	16.98	16.6606	16.5936	Q96C86	Q96C86	DCPS_HUMAN	DCPS	m7GpppX diphosphatase	Q96C86	FALSE	0	-0.702066	-0.181862	-0.441964	0.0144764	0.00622493	-4.20056	FALSE	FALSE	Stable	Stable
DCTD	22.8029	22.7811	22.9025	22.5266	22.4526	22.476	P32321	P32321	DCTD_HUMAN	DCTD	Deoxycytidylate deaminase	P32321	FALSE	0	-0.457029	-0.23052	-0.343775	0.00155153	0.000351479	-7.50383	FALSE	FALSE	Stable	Stable
DCTN1	23.6395	23.6051	23.6319	23.4694	23.5082	23.4835	Q14203	Q14203	DCTN1_HUMAN	DCTN1	Dynactin subunit 1	Q14203	FALSE	0	-0.215172	-0.061752	-0.138462	0.0116593	0.00472317	-4.46214	FALSE	FALSE	Stable	Stable
DCTN2	22.52	22.2955	22.3153	22.229	22.3197	22.2645	Q13561	Q13561	DCTN2_HUMAN	DCTN2	Dynactin subunit 2	Q13561	FALSE	0	-0.278221	0.0665002	-0.105861	0.242326	0.181784	-1.51831	FALSE	FALSE	Stable	Stable
DCTN3	23.0681	23.0708	23.0233	22.9152	22.9052	22.9363	O75935	O75935	DCTN3_HUMAN	DCTN3	Dynactin subunit 3	O75935	FALSE	0	-0.214171	-0.0561738	-0.135172	0.0141225	0.00603196	-4.22992	FALSE	FALSE	Stable	Stable
DCTN4	22.9406	22.9666	22.8429	22.8594	22.8336	22.8723	Q9UJW0	Q9UJW0	DCTN4_HUMAN	DCTN4	Dynactin subunit 4	Q9UJW0	FALSE	0	-0.168573	0.0453602	-0.0616064	0.26891	0.206373	-1.42378	FALSE	FALSE	Stable	Stable
DCTN5	20.2437	20.5572	20.8442	20.5639	20.2636	21.0148	Q9BTE1	Q9BTE1	DCTN5_HUMAN	DCTN5	Dynactin subunit 5	Q9BTE1	FALSE	0	-0.512915	0.644362	0.0657236	0.827479	0.788689	0.280787	FALSE	FALSE	Stable	Stable
DCTN6	20.8432	20.79	20.8921	20.6485	20.7072	20.7478	O00399	O00399	DCTN6_HUMAN	DCTN6	Dynactin subunit 6	O00399	FALSE	0	-0.250543	-0.030595	-0.140569	0.0383663	0.0206926	-3.15983	FALSE	FALSE	Stable	Stable
DCTPP1	23.1726	23.1422	23.2314	23.2704	23.2856	23.2198	Q9H773	Q9H773	DCTP1_HUMAN	DCTPP1	dCTP pyrophosphatase 1	Q9H773	FALSE	0	-0.0207575	0.173839	0.0765406	0.14814	0.101819	1.94469	FALSE	FALSE	Stable	Stable
DCUN1D1	21.4838	21.401	21.4529	22.0479	22.0288	22.0573	Q96GG9	Q96GG9	DCNL1_HUMAN	DCUN1D1	DCN1-like protein 1	Q96GG9	FALSE	0	0.511282	0.686268	0.598775	8.02487e-05	3.95818e-06	16.9181	TRUE	TRUE	Up	Up
DCUN1D3	19.934	19.9013	19.8271	19.4341	19.5352	19.479	Q8IWE4	Q8IWE4	DCNL3_HUMAN	DCUN1D3	DCN1-like protein 3	Q8IWE4	FALSE	0	-0.517601	-0.291777	-0.404689	0.000817561	0.000144352	-8.86023	FALSE	FALSE	Stable	Stable
DCUN1D4	20.5149	20.3948	20.3557	20.5722	20.6125	20.4068	Q92564	Q92564	DCNL4_HUMAN	DCUN1D4	DCN1-like protein 4	Q92564	FALSE	0	-0.0686514	0.285989	0.108669	0.243202	0.182597	1.51499	FALSE	FALSE	Stable	Stable
DCUN1D5	21.8619	21.7704	21.8815	21.9283	21.955	21.9699	Q9BTE7	Q9BTE7	DCNL5_HUMAN	DCUN1D5	DCN1-like protein 5	Q9BTE7	FALSE	0	0.0107569	0.215555	0.113156	0.0609426	0.0355688	2.73178	FALSE	FALSE	Stable	Stable
DCXR	23.0449	23.1062	23.1174	23.128	23.1148	23.1442	Q7Z4W1	Q7Z4W1	DCXR_HUMAN	DCXR	L-xylulose reductase	Q7Z4W1	FALSE	0	-0.0461576	0.125153	0.0394977	0.368797	0.299502	1.13994	FALSE	FALSE	Stable	Stable
DDA1	17.6545	18.1384	17.0501	18.2601	18.0528	17.8327	Q9BW61	Q9BW61	DDA1_HUMAN	DDA1	DET1- and DDB1-associated protein 1	Q9BW61	FALSE	0	-0.266006	1.13441	0.434204	0.238406	0.178229	1.53296	FALSE	FALSE	Stable	Stable
DDAH1	22.8792	22.8252	22.8404	23.95	23.9763	23.9519	O94760	O94760	DDAH1_HUMAN	DDAH1	N(G),N(G)-dimethylarginine dimethylaminohydrolase 1	O94760	FALSE	0	1.0319	1.19033	1.11112	8.37451e-06	6.59966e-08	34.6749	TRUE	TRUE	Up	Up
DDAH2	23.0149	22.97	23.046	22.9359	22.8477	22.792	O95865	O95865	DDAH2_HUMAN	DDAH2	N(G),N(G)-dimethylarginine dimethylaminohydrolase 2	O95865	FALSE	0	-0.27172	-0.0317659	-0.151743	0.0397098	0.0215604	-3.12661	FALSE	FALSE	Stable	Stable
DDB1	23.875	23.8824	23.9478	24.0412	24.0346	24.0175	Q16531	Q16531	DDB1_HUMAN	DDB1	DNA damage-binding protein 1	Q16531	FALSE	0	0.0436084	0.215176	0.129392	0.0219929	0.0105107	3.72878	FALSE	FALSE	Stable	Stable
DDB2	21.0849	21.0523	21.006	21.1851	21.2573	21.1954	Q92466	Q92466	DDB2_HUMAN	DDB2	DNA damage-binding protein 2	Q92466	FALSE	0	0.0687066	0.261161	0.164934	0.0140497	0.00598538	4.23717	FALSE	FALSE	Stable	Stable
DDC	19.1677	19.0892	19.0925	19.2846	19.1828	19.1807	P20711	P20711	DDC_HUMAN	DDC	Aromatic-L-amino-acid decarboxylase	P20711	FALSE	0	-0.012979	0.212081	0.0995512	0.11215	0.0732679	2.18696	FALSE	FALSE	Stable	Stable
DDHD1	22.1068	22.0618	21.7787	22.4064	22.3486	22.3564	Q8NEL9	Q8NEL9	DDHD1_HUMAN	DDHD1	Phospholipase DDHD1	Q8NEL9	FALSE	0	0.162104	0.613936	0.38802	0.0139402	0.00592973	4.24591	FALSE	FALSE	Stable	Stable
DDHD2	20.8462	20.7925	20.7083	21.5185	21.5518	21.5144	O94830	O94830	DDHD2_HUMAN	DDHD2	Phospholipase DDHD2	O94830	FALSE	0	0.634955	0.856883	0.745919	8.50601e-05	4.38019e-06	16.6179	TRUE	TRUE	Up	Up
DDI2	20.6039	20.55	20.5465	20.2345	20.2313	20.2699	Q5TDH0	Q5TDH0	DDI2_HUMAN	DDI2	Protein DDI1 homolog 2	Q5TDH0	FALSE	0	-0.405191	-0.237998	-0.321594	0.000631271	9.82448e-05	-9.51012	FALSE	FALSE	Stable	Stable
DDIT3	15.303	16.0924	15.9727	16.8386	16.963	16.9438	P35638	P35638	DDIT3_HUMAN	DDIT3	DNA damage-inducible transcript 3 protein	P35638	TRUE	2	0.608686	1.64286	1.12577	0.00569093	0.00192825	5.38209	TRUE	TRUE	Up	Up
DDOST	25.118	25.1768	25.2297	25.3106	25.2741	25.2877	P39656	P39656	OST48_HUMAN	DDOST	Dolichyl-diphosphooligosaccharide--protein glycosyltransferase 48 kDa subunit	P39656	FALSE	0	0.0170806	0.214868	0.115974	0.0505689	0.0286937	2.89906	FALSE	FALSE	Stable	Stable
DDR2	18.2534	18.3096	18.369	18.3124	18.3027	18.3008	Q16832	Q16832	DDR2_HUMAN	DDR2	Discoidin domain-containing receptor 2	Q16832	FALSE	0	-0.103616	0.0929253	-0.00534524	0.916496	0.897612	-0.134465	FALSE	FALSE	Stable	Stable
DDRGK1	20.9718	20.877	20.7859	21.0964	21.3756	21.1553	Q96HY6	Q96HY6	DDRGK_HUMAN	DDRGK1	DDRGK domain-containing protein 1	Q96HY6	FALSE	0	0.112349	0.549409	0.330879	0.0217074	0.0103407	3.74302	FALSE	FALSE	Stable	Stable
DDT	25.0705	24.8815	24.7975	24.7404	24.73	24.7774	P30046	P30046;A6NHG4	DOPD_HUMAN	DDT	D-dopachrome decarboxylase	P30046	FALSE	0	-0.350133	0.0155341	-0.167299	0.102907	0.0662088	-2.26205	FALSE	FALSE	Stable	Stable
DDX1	24.3584	24.3906	24.3834	24.4591	24.4355	24.3787	Q92499	Q92499	DDX1_HUMAN	DDX1	ATP-dependent RNA helicase DDX1	Q92499	FALSE	0	-0.040775	0.13468	0.0469523	0.300562	0.235921	1.32308	FALSE	FALSE	Stable	Stable
DDX10	20.0029	19.9284	19.9645	20.2452	20.185	20.2424	Q13206	Q13206	DDX10_HUMAN	DDX10	Probable ATP-dependent RNA helicase DDX10	Q13206	FALSE	0	0.166847	0.350954	0.258901	0.00207525	0.000524892	6.95272	FALSE	FALSE	Stable	Stable
DDX12P	18.8796	18.9149	19.0089	19.1225	19.1053	19.1952	Q92771	Q96FC9;A8MPP1;Q92771	DDX12_HUMAN	DDX12P	Putative ATP-dependent RNA helicase DDX12	Q92771	FALSE	0	0.086436	0.326636	0.206536	0.0138736	0.00589604	4.25125	FALSE	FALSE	Stable	Stable
DDX17	24.6542	24.693	24.6614	24.8201	24.7945	24.7502	Q92841	Q92841	DDX17_HUMAN	DDX17	Probable ATP-dependent RNA helicase DDX17	Q92841	FALSE	0	0.0335644	0.203891	0.118727	0.0288868	0.0146194	3.44639	FALSE	FALSE	Stable	Stable
DDX18	22.3638	22.413	22.4591	22.1325	22.087	22.1822	Q9NVP1	Q9NVP1	DDX18_HUMAN	DDX18	ATP-dependent RNA helicase DDX18	Q9NVP1	FALSE	0	-0.384305	-0.17179	-0.278048	0.00277015	0.000763084	-6.46877	FALSE	FALSE	Stable	Stable
DDX19A	23.8627	23.7578	23.8093	23.8048	23.7585	23.7174	Q9NUU7	Q9NUU7;Q9UMR2	DD19A_HUMAN	DDX19A	ATP-dependent RNA helicase DDX19A	Q9NUU7	FALSE	0	-0.156816	0.0574041	-0.0497059	0.366127	0.296721	-1.14721	FALSE	FALSE	Stable	Stable
DDX19B	20.0834	20.0996	19.916	20.1674	20.1346	19.9417	Q9UMR2	Q9UMR2	DD19B_HUMAN	DDX19B	ATP-dependent RNA helicase DDX19B	Q9UMR2	FALSE	0	-0.153079	0.249531	0.0482261	0.637276	0.576194	0.592232	FALSE	FALSE	Stable	Stable
DDX20	21.7537	21.7037	21.663	21.9652	21.8922	21.8291	Q9UHI6	Q9UHI6	DDX20_HUMAN	DDX20	Probable ATP-dependent RNA helicase DDX20	Q9UHI6	FALSE	0	0.068855	0.30851	0.188683	0.0189758	0.0087291	3.89259	FALSE	FALSE	Stable	Stable
DDX21	24.1648	24.2194	24.1726	24.3029	24.2894	24.2604	Q9NR30	Q9NR30	DDX21_HUMAN	DDX21	Nucleolar RNA helicase 2	Q9NR30	FALSE	0	0.0163279	0.180939	0.0986336	0.047185	0.0264759	2.9625	FALSE	FALSE	Stable	Stable
DDX23	23.0624	23.0308	23.0339	22.7988	22.805	22.8733	Q9BUQ8	Q9BUQ8	DDX23_HUMAN	DDX23	Probable ATP-dependent RNA helicase DDX23	Q9BUQ8	FALSE	0	-0.304546	-0.128786	-0.216666	0.00349055	0.0010348	-6.09487	FALSE	FALSE	Stable	Stable
DDX24	20.9862	20.9472	20.9171	21.2434	21.3682	21.2408	Q9GZR7	Q9GZR7	DDX24_HUMAN	DDX24	ATP-dependent RNA helicase DDX24	Q9GZR7	FALSE	0	0.215293	0.452586	0.333939	0.00206829	0.000522865	6.95787	FALSE	FALSE	Stable	Stable
DDX27	22.6034	22.601	22.5855	22.7885	22.892	22.9521	Q96GQ7	Q96GQ7	DDX27_HUMAN	DDX27	Probable ATP-dependent RNA helicase DDX27	Q96GQ7	FALSE	0	0.159685	0.402153	0.280919	0.00446665	0.00141506	5.72823	FALSE	FALSE	Stable	Stable
DDX28	19.2299	19.2688	19.1874	19.1409	19.3935	19.2782	Q9NUL7	Q9NUL7	DDX28_HUMAN	DDX28	Probable ATP-dependent RNA helicase DDX28	Q9NUL7	FALSE	0	-0.130586	0.214947	0.0421809	0.63088	0.569133	0.60356	FALSE	FALSE	Stable	Stable
DDX31	19.2718	19.2533	19.3157	19.2615	19.2683	19.2264	Q9H8H2	Q9H8H2	DDX31_HUMAN	DDX31	Probable ATP-dependent RNA helicase DDX31	Q9H8H2	FALSE	0	-0.11219	0.0557194	-0.0282351	0.509835	0.438859	-0.831399	FALSE	FALSE	Stable	Stable
DDX39A	22.2041	22.2509	22.3415	21.732	21.8372	21.764	O00148	O00148	DX39A_HUMAN	DDX39A	ATP-dependent RNA helicase DDX39A	O00148	FALSE	0	-0.613895	-0.361681	-0.487788	0.000618621	9.53625e-05	-9.56214	FALSE	FALSE	Stable	Stable
DDX39B	25.9257	25.8918	25.9621	25.8813	25.8364	25.9102	Q13838	O00148;Q13838	DX39B_HUMAN	DDX39B	Spliceosome RNA helicase DDX39B	Q13838	FALSE	0	-0.143216	0.0420872	-0.0505646	0.291841	0.227926	-1.34914	FALSE	FALSE	Stable	Stable
DDX3X	25.2697	25.3777	25.3839	25.0348	24.9783	25.0739	O00571	O00571	DDX3X_HUMAN	DDX3X	ATP-dependent RNA helicase DDX3X	O00571	FALSE	0	-0.43302	-0.196576	-0.314798	0.00258743	0.000697424	-6.58259	FALSE	FALSE	Stable	Stable
DDX3Y	26.9002	26.9138	26.8967	26.621	26.6453	26.6387	O15523	O00571;O15523	DDX3Y_HUMAN	DDX3Y	ATP-dependent RNA helicase DDX3Y	O15523	FALSE	0	-0.340819	-0.196386	-0.268602	0.000715103	0.000118063	-9.19466	FALSE	FALSE	Stable	Stable
DDX41	21.2063	21.215	21.187	21.228	21.219	21.2248	Q9UJV9	Q9UJV9	DDX41_HUMAN	DDX41	Probable ATP-dependent RNA helicase DDX41	Q9UJV9	FALSE	0	-0.050913	0.093244	0.0211655	0.563772	0.496323	0.725918	FALSE	FALSE	Stable	Stable
DDX42	22.7594	22.7973	22.8124	22.6329	22.7842	22.74	Q86XP3	Q86XP3	DDX42_HUMAN	DDX42	ATP-dependent RNA helicase DDX42	Q86XP3	FALSE	0	-0.191088	0.049767	-0.0706606	0.261627	0.199126	-1.45049	FALSE	FALSE	Stable	Stable
DDX46	23.2718	23.2468	23.2564	23.5401	23.5734	23.5309	Q7L014	Q7L014	DDX46_HUMAN	DDX46	Probable ATP-dependent RNA helicase DDX46	Q7L014	FALSE	0	0.213524	0.365972	0.289748	0.000659258	0.000104864	9.3971	FALSE	FALSE	Stable	Stable
DDX47	22.6129	22.6514	22.5627	22.9781	22.8866	22.9077	Q9H0S4	Q9H0S4	DDX47_HUMAN	DDX47	Probable ATP-dependent RNA helicase DDX47	Q9H0S4	FALSE	0	0.210585	0.419649	0.315117	0.00159201	0.000364542	7.45222	FALSE	FALSE	Stable	Stable
DDX49	20.5936	20.6787	20.6718	20.7088	20.6083	20.7169	Q9Y6V7	Q9Y6V7	DDX49_HUMAN	DDX49	Probable ATP-dependent RNA helicase DDX49	Q9Y6V7	FALSE	0	-0.0850259	0.144943	0.0299586	0.60852	0.544303	0.64409	FALSE	FALSE	Stable	Stable
DDX5	26.5634	26.5622	26.575	26.6946	26.7325	26.7157	P17844	P17844	DDX5_HUMAN	DDX5	Probable ATP-dependent RNA helicase DDX5	P17844	FALSE	0	0.0734909	0.221227	0.147359	0.0079833	0.00294863	4.93155	FALSE	FALSE	Stable	Stable
DDX50	22.1805	22.0854	22.081	22.0094	22.026	21.9212	Q9BQ39	Q9BQ39	DDX50_HUMAN	DDX50	ATP-dependent RNA helicase DDX50	Q9BQ39	FALSE	0	-0.247714	-0.0124577	-0.130086	0.0608528	0.0354712	-2.7339	FALSE	FALSE	Stable	Stable
DDX51	21.3286	21.3536	21.2939	21.3973	21.4785	21.5333	Q8N8A6	Q8N8A6	DDX51_HUMAN	DDX51	ATP-dependent RNA helicase DDX51	Q8N8A6	FALSE	0	0.0313411	0.257398	0.144369	0.0384555	0.0207506	3.15756	FALSE	FALSE	Stable	Stable
DDX52	19.8943	19.9299	19.9435	20.2122	20.0245	20.1442	Q9Y2R4	Q9Y2R4	DDX52_HUMAN	DDX52	Probable ATP-dependent RNA helicase DDX52	Q9Y2R4	FALSE	0	0.0680626	0.340643	0.204353	0.0224805	0.0107814	3.70664	FALSE	FALSE	Stable	Stable
DDX54	21.4273	21.5203	21.5167	21.8258	21.8919	21.893	Q8TDD1	Q8TDD1	DDX54_HUMAN	DDX54	ATP-dependent RNA helicase DDX54	Q8TDD1	FALSE	0	0.277733	0.486496	0.382114	0.000756556	0.000128707	9.04972	FALSE	FALSE	Stable	Stable
DDX55	20.8391	20.7373	20.7497	21.1698	21.0099	21.0863	Q8NHQ9	Q8NHQ9	DDX55_HUMAN	DDX55	ATP-dependent RNA helicase DDX55	Q8NHQ9	FALSE	0	0.178059	0.448562	0.313311	0.00447118	0.00141707	5.72661	FALSE	FALSE	Stable	Stable
DDX56	22.2688	22.3505	22.4044	22.3301	22.3573	22.4354	Q9NY93	Q9NY93	DDX56_HUMAN	DDX56	Probable ATP-dependent RNA helicase DDX56	Q9NY93	FALSE	0	-0.092252	0.158389	0.0330683	0.604078	0.539352	0.65231	FALSE	FALSE	Stable	Stable
DDX58	20.0718	20.0048	20.0785	22.2085	22.141	22.1845	O95786	O95786	DDX58_HUMAN	DDX58	Antiviral innate immune response receptor RIG-I	O95786	FALSE	0	2.03203	2.22056	2.1263	2.08606e-06	4.31303e-09	55.7615	TRUE	TRUE	Up	Up
DDX59	19.6395	19.4659	19.605	19.9144	19.8721	20.0471	Q5T1V6	Q5T1V6	DDX59_HUMAN	DDX59	Probable ATP-dependent RNA helicase DDX59	Q5T1V6	FALSE	0	0.205191	0.543549	0.37437	0.00535154	0.00177948	5.4704	FALSE	FALSE	Stable	Stable
DDX6	23.5114	23.5162	23.5005	23.3183	23.3088	23.2557	P26196	P26196	DDX6_HUMAN	DDX6	Probable ATP-dependent RNA helicase DDX6	P26196	FALSE	0	-0.296217	-0.134005	-0.215111	0.00263101	0.00071188	-6.5565	FALSE	FALSE	Stable	Stable
DDX60	20.1129	20.0174	19.8841	21.232	21.2108	21.259	Q8IY21	Q8IY21	DDX60_HUMAN	DDX60	Probable ATP-dependent RNA helicase DDX60	Q8IY21	FALSE	0	1.07297	1.3853	1.22913	4.98483e-05	1.79107e-06	19.4571	TRUE	TRUE	Up	Up
DDX60L	19.0102	19.1388	18.7683	20.0891	19.91	19.9695	Q5H9U9	Q5H9U9	DDX6L_HUMAN	DDX60L	Probable ATP-dependent RNA helicase DDX60-like	Q5H9U9	FALSE	0	0.758765	1.2754	1.01708	0.000581819	8.65422e-05	9.73347	TRUE	TRUE	Up	Up
DECR1	23.3821	23.3987	23.3578	23.4351	23.4213	23.4128	Q16698	Q16698	DECR_HUMAN	DECR1	2,4-dienoyl-CoA reductase [(3E)-enoyl-CoA-producing], mitochondrial	Q16698	FALSE	0	-0.0316339	0.118748	0.0435572	0.266632	0.204103	1.43205	FALSE	FALSE	Stable	Stable
DECR2	21.6669	21.683	21.6546	21.3499	21.3885	21.3491	Q9NUI1	Q9NUI1	DECR2_HUMAN	DECR2	Peroxisomal 2,4-dienoyl-CoA reductase [(3E)-enoyl-CoA-producing]	Q9NUI1	FALSE	0	-0.382357	-0.228984	-0.30567	0.000553127	8.09211e-05	-9.85364	FALSE	FALSE	Stable	Stable
DEF8	18.2799	18.1478	18.3705	19.1745	19.2846	19.2842	Q6ZN54	Q6ZN54	DEFI8_HUMAN	DEF8	Differentially expressed in FDCP 8 homolog	Q6ZN54	FALSE	0	0.813436	1.15003	0.981733	0.000138279	9.74676e-06	14.4205	TRUE	TRUE	Up	Up
DEK	25.037	24.9915	25.0277	25.0344	24.9504	25.0189	P35659	P35659	DEK_HUMAN	DEK	Protein DEK	P35659	FALSE	0	-0.109745	0.0748431	-0.0174509	0.712377	0.657363	-0.46742	FALSE	FALSE	Stable	Stable
DENND10	20.8297	20.8368	20.9153	20.7481	20.766	20.7835	Q8TCE6	Q8TCE6;Q6NSW5	DEN10_HUMAN	DENND10	DENN domain-containing protein 10	Q8TCE6	FALSE	0	-0.187032	-0.00252385	-0.0947779	0.0754892	0.0457213	-2.53972	FALSE	FALSE	Stable	Stable
DENND11	18.2644	18.0746	18.1892	18.3825	18.3712	16.4563	A4D1U4	A4D1U4	DEN11_HUMAN	DENND11	DENN domain-containing protein 11	A4D1U4	TRUE	1	-1.76525	0.886447	-0.439403	0.515475	0.445205	-0.819281	FALSE	FALSE	Stable	Stable
DENND2B	19.292	19.4539	19.3108	18.9552	18.9882	19.0572	P78524	P78524	DEN2B_HUMAN	DENND2B	DENN domain-containing protein 2B	P78524	FALSE	0	-0.492743	-0.211267	-0.352005	0.00329891	0.000961845	-6.18304	FALSE	FALSE	Stable	Stable
DENND3	19.5213	19.7753	19.4402	19.5087	19.0583	19.5524	A2RUS2	A2RUS2	DEND3_HUMAN	DENND3	DENN domain-containing protein 3	A2RUS2	FALSE	0	-0.598242	0.186703	-0.205769	0.309723	0.244468	-1.29609	FALSE	FALSE	Stable	Stable
DENND4A	18.1804	18.6941	17.7282	18.3592	18.3101	18.4073	Q7Z401	Q7Z401	MYCPP_HUMAN	DENND4A	C-myc promoter-binding protein	Q7Z401	FALSE	0	-0.424061	0.739928	0.157933	0.593838	0.528298	0.67084	FALSE	FALSE	Stable	Stable
DENND4B	17.6214	17.6839	17.907	17.8404	17.9283	17.9842	O75064	O75064	DEN4B_HUMAN	DENND4B	DENN domain-containing protein 4B	O75064	FALSE	0	-0.0300491	0.390445	0.180198	0.121087	0.0803553	2.11877	FALSE	FALSE	Stable	Stable
DENND4C	22.0606	22.0172	22.0514	22.3445	22.3977	22.3637	Q5VZ89	Q5VZ89	DEN4C_HUMAN	DENND4C	DENN domain-containing protein 4C	Q5VZ89	FALSE	0	0.244103	0.407076	0.32559	0.000549214	7.98535e-05	9.87756	FALSE	FALSE	Stable	Stable
DENND5A	19.2301	19.4238	19.4002	19.3753	19.4751	19.1789	Q6IQ26	Q6IQ26	DEN5A_HUMAN	DENND5A	DENN domain-containing protein 5A	Q6IQ26	FALSE	0	-0.238132	0.221581	-0.00827511	0.945121	0.932098	-0.0889982	FALSE	FALSE	Stable	Stable
DENND5B	20.3076	20.1305	20.2477	20.2333	20.2121	20.2553	Q6ZUT9	Q6ZUT9	DEN5B_HUMAN	DENND5B	DENN domain-containing protein 5B	Q6ZUT9	FALSE	0	-0.125524	0.135425	0.00495036	0.942285	0.928451	0.0937939	FALSE	FALSE	Stable	Stable
DENND6A	19.588	19.7313	19.6676	19.6831	19.7435	19.7552	Q8IWF6	Q8IWF6	DEN6A_HUMAN	DENND6A	Protein DENND6A	Q8IWF6	FALSE	0	-0.0546014	0.184535	0.0649666	0.293877	0.229727	1.3432	FALSE	FALSE	Stable	Stable
DENR	23.1016	23.2055	23.0458	23.1973	23.3458	23.4239	O43583	O43583	DENR_HUMAN	DENR	Density-regulated protein	O43583	FALSE	0	0.0232933	0.386214	0.204754	0.0571126	0.0330172	2.78942	FALSE	FALSE	Stable	Stable
DEPDC1	18.8216	18.9726	18.632	18.8117	18.9462	18.9001	Q5TB30	Q5TB30	DEP1A_HUMAN	DEPDC1	DEP domain-containing protein 1A	Q5TB30	FALSE	0	-0.152274	0.306894	0.0773099	0.509506	0.438313	0.832448	FALSE	FALSE	Stable	Stable
DEPDC5	17.3288	17.6363	18.1701	17.6604	17.2492	17.2751	O75140	O75140	DEPD5_HUMAN	DEPDC5	GATOR complex protein DEPDC5	O75140	FALSE	0	-0.896814	0.263167	-0.316824	0.291568	0.227547	-1.35039	FALSE	FALSE	Stable	Stable
DEPDC7	18.1768	18.2903	18.3357	18.2904	17.4449	17.6358	Q96QD5	Q96QD5	DEPD7_HUMAN	DEPDC7	DEP domain-containing protein 7	Q96QD5	FALSE	0	-1.01816	0.0636972	-0.47723	0.112813	0.0738623	-2.18099	FALSE	FALSE	Stable	Stable
DERA	22.5374	22.3857	22.4406	21.907	21.9402	21.9447	Q9Y315	Q9Y315	DEOC_HUMAN	DERA	Deoxyribose-phosphate aldolase	Q9Y315	FALSE	0	-0.641506	-0.406398	-0.523952	0.000367663	4.37503e-05	-11.0184	TRUE	TRUE	Down	Down
DERL1	23.7589	23.6249	23.554	23.7143	23.6787	23.6184	Q9BUN8	Q9BUN8	DERL1_HUMAN	DERL1	Derlin-1	Q9BUN8	FALSE	0	-0.128805	0.177901	0.024548	0.755911	0.706556	0.395721	FALSE	FALSE	Stable	Stable
DERL2	21.0752	21.2048	21.2202	21.3143	21.1513	21.351	Q9GZP9	Q9GZP9	DERL2_HUMAN	DERL2	Derlin-2	Q9GZP9	FALSE	0	-0.0672412	0.278184	0.105472	0.24475	0.183917	1.50965	FALSE	FALSE	Stable	Stable
DERPC	22.0569	22.1476	22.1598	22.0924	22.1681	22.186	P0CG12	P0CG12	DERPC_HUMAN	DERPC	Decreased expression in renal and prostate cancer protein	P0CG12	FALSE	0	-0.0859235	0.140757	0.0274168	0.633905	0.572596	0.597993	FALSE	FALSE	Stable	Stable
DESI1	21.3926	21.4662	21.2947	21.2906	21.3319	21.3202	Q6ICB0	Q6ICB0	DESI1_HUMAN	DESI1	Desumoylating isopeptidase 1	Q6ICB0	FALSE	0	-0.19675	0.0562063	-0.0702717	0.284073	0.220674	-1.3735	FALSE	FALSE	Stable	Stable
DFFA	22.6859	22.814	22.6916	23.2007	23.1103	23.1398	O00273	O00273	DFFA_HUMAN	DFFA	DNA fragmentation factor subunit alpha	O00273	FALSE	0	0.296104	0.543473	0.419789	0.000996082	0.0001937	8.39033	FALSE	FALSE	Stable	Stable
DFFB	16.6352	17.0855	16.9972	16.4797	16.8315	16.7538	O76075	O76075	DFFB_HUMAN	DFFB	DNA fragmentation factor subunit beta	O76075	FALSE	0	-0.583357	0.148187	-0.217585	0.25585	0.19384	-1.47056	FALSE	FALSE	Stable	Stable
DGCR6	17.3682	17.198	17.306	17.2078	17.0222	17.1355	Q14129;Q9BY27	Q14129;Q9BY27	DGC6L_HUMAN;DGCR6_HUMAN	DGCR6;DGCR6L	Protein DGCR6	Q14129	FALSE	0	-0.33549	-0.0022566	-0.168873	0.0783725	0.0478309	-2.50557	FALSE	FALSE	Stable	Stable
DGCR8	20.9779	20.7914	20.8889	20.8161	20.8566	20.992	Q8WYQ5	Q8WYQ5	DGCR8_HUMAN	DGCR8	Microprocessor complex subunit DGCR8	Q8WYQ5	FALSE	0	-0.168663	0.173083	0.00220993	0.980287	0.975574	0.031972	FALSE	FALSE	Stable	Stable
DGKA	22.2715	22.2216	22.2924	22.2113	22.1588	22.141	P23743	P23743	DGKA_HUMAN	DGKA	Diacylglycerol kinase alpha	P23743	FALSE	0	-0.184422	0.00145133	-0.0914852	0.0848768	0.0526313	-2.43348	FALSE	FALSE	Stable	Stable
DGKE	18.5565	18.1495	18.3859	20.0754	19.9177	19.8551	P52429	P52429	DGKE_HUMAN	DGKE	Diacylglycerol kinase epsilon	P52429	FALSE	0	1.29861	1.8722	1.5854	0.000166696	1.31811e-05	13.6658	TRUE	TRUE	Up	Up
DGKH	17.658	17.4853	17.9302	17.2778	17.7863	17.1416	Q86XP1	Q86XP1	DGKH_HUMAN	DGKH	Diacylglycerol kinase eta	Q86XP1	FALSE	0	-0.778648	0.200105	-0.289271	0.258624	0.196274	-1.46125	FALSE	FALSE	Stable	Stable
DGKQ	17.7992	18.0677	18.1567	18.454	18.4858	18.4365	P52824	P52824	DGKQ_HUMAN	DGKQ	Diacylglycerol kinase theta	P52824	FALSE	0	0.216819	0.684916	0.450868	0.00910566	0.00348278	4.76219	FALSE	FALSE	Stable	Stable
DGKZ	17.9351	17.9291	17.8642	17.9625	17.6124	17.7543	Q13574	Q13574	DGKZ_HUMAN	DGKZ	Diacylglycerol kinase zeta	Q13574	FALSE	0	-0.358756	0.0926742	-0.133041	0.259805	0.197371	-1.4571	FALSE	FALSE	Stable	Stable
DGLUCY	18.4039	18.5156	18.4624	18.5772	18.5172	18.3759	Q7Z3D6	Q7Z3D6	GLUCM_HUMAN	DGLUCY	D-glutamate cyclase, mitochondrial	Q7Z3D6	FALSE	0	-0.126741	0.185675	0.0294668	0.713008	0.658098	0.46633	FALSE	FALSE	Stable	Stable
DHCR24	24.6551	24.7397	24.6487	24.9196	24.8362	24.9091	Q15392	Q15392	DHC24_HUMAN	DHCR24	Delta(24)-sterol reductase	Q15392	FALSE	0	0.100073	0.314102	0.207088	0.00896033	0.00340873	4.78383	FALSE	FALSE	Stable	Stable
DHCR7	22.8148	22.8947	22.8773	22.9397	22.8245	22.9121	Q9UBM7	Q9UBM7	DHCR7_HUMAN	DHCR7	7-dehydrocholesterol reductase	Q9UBM7	FALSE	0	-0.0819182	0.141613	0.0298475	0.59942	0.534639	0.660181	FALSE	FALSE	Stable	Stable
DHDDS	16.8959	17.0194	16.9909	16.862	16.8187	16.4884	Q86SQ9	Q86SQ9	DHDDS_HUMAN	DHDDS	Dehydrodolichyl diphosphate synthase complex subunit DHDDS	Q86SQ9	FALSE	0	-0.510038	0.0186791	-0.24568	0.0987975	0.0631337	-2.29742	FALSE	FALSE	Stable	Stable
DHFR	24.1655	24.1446	24.1691	23.8973	23.8243	23.8335	P00374	P00374	DYR_HUMAN	DHFR	Dihydrofolate reductase	P00374	FALSE	0	-0.393859	-0.222282	-0.308071	0.000812614	0.000142848	-8.87738	FALSE	FALSE	Stable	Stable
DHODH	20.7714	20.7111	20.7299	21.2354	21.4035	21.1502	Q02127	Q02127	PYRD_HUMAN	DHODH	Dihydroorotate dehydrogenase (quinone), mitochondrial	Q02127	FALSE	0	0.353139	0.698022	0.52558	0.00152091	0.000343943	7.53462	TRUE	TRUE	Up	Up
DHPS	21.6967	21.5894	21.4352	21.9915	22.1747	21.9495	P49366	P49366	DHYS_HUMAN	DHPS	Deoxyhypusine synthase	P49366	FALSE	0	0.24203	0.687548	0.464789	0.00672062	0.00237407	5.15804	FALSE	FALSE	Stable	Stable
DHRS1	22.8143	22.8651	22.8825	23.1695	23.0618	23.1394	Q96LJ7	Q96LJ7	DHRS1_HUMAN	DHRS1	Dehydrogenase/reductase SDR family member 1	Q96LJ7	FALSE	0	0.164651	0.374559	0.269605	0.00297806	0.000839148	6.35026	FALSE	FALSE	Stable	Stable
DHRS11	21.2011	21.1371	21.116	21.6177	21.627	21.5388	Q6UWP2	Q6UWP2	DHR11_HUMAN	DHRS11	Dehydrogenase/reductase SDR family member 11	Q6UWP2	FALSE	0	0.338249	0.547811	0.44303	0.000448216	5.85307e-05	10.4523	FALSE	FALSE	Stable	Stable
DHRS13	19.2884	19.2517	19.2876	19.8342	15.7447	19.6111	Q6UX07	Q6UX07	DHR13_HUMAN	DHRS13	Dehydrogenase/reductase SDR family member 13	Q6UX07	TRUE	1	-3.61569	1.85715	-0.87927	0.52789	0.458479	-0.794335	FALSE	FALSE	Stable	Stable
DHRS4	18.8158	18.6568	18.7301	18.3929	18.2365	18.11	P0CG22;Q9BTZ2	Q9BTZ2;P0CG22	DHRS4_HUMAN;DR4L1_HUMAN	DHRS4;DHRS4L1	Putative dehydrogenase/reductase SDR family member 4-like 1	P0CG22	FALSE	0	-0.693334	-0.282208	-0.487771	0.00405293	0.001256	-5.8659	FALSE	FALSE	Stable	Stable
DHRS7	20.351	20.6254	20.2788	20.9676	20.7299	20.6678	Q9Y394	Q9Y394	DHRS7_HUMAN	DHRS7	Dehydrogenase/reductase SDR family member 7	Q9Y394	FALSE	0	0.0739812	0.666033	0.370007	0.0412883	0.0225663	3.0899	FALSE	FALSE	Stable	Stable
DHRS7B	20.1433	19.9574	20.0701	20.0711	20.0498	20.0868	Q6IAN0	Q6IAN0	DRS7B_HUMAN	DHRS7B	Dehydrogenase/reductase SDR family member 7B	Q6IAN0	FALSE	0	-0.121026	0.145614	0.0122936	0.858545	0.82756	0.227955	FALSE	FALSE	Stable	Stable
DHRSX	16.1696	16.0716	15.4176	16.3164	16.7202	16.2834	Q8N5I4	Q8N5I4	DHRSX_HUMAN	DHRSX	Dehydrogenase/reductase SDR family member on chromosome X	Q8N5I4	TRUE	1	-0.0165495	1.12393	0.553692	0.0881042	0.055007	2.40034	FALSE	FALSE	Stable	Stable
DHTKD1	20.1566	20.1068	20.1265	20.2833	20.3304	20.3403	Q96HY7	Q96HY7	DHTK1_HUMAN	DHTKD1	2-oxoadipate dehydrogenase complex component E1	Q96HY7	FALSE	0	0.103949	0.272203	0.188076	0.00513701	0.00169161	5.52664	FALSE	FALSE	Stable	Stable
DHX15	23.9789	23.941	23.9509	24.0056	23.9899	24.0288	O43143	O43143	DHX15_HUMAN	DHX15	ATP-dependent RNA helicase DHX15	O43143	FALSE	0	-0.0260578	0.128424	0.0511832	0.211224	0.154589	1.63811	FALSE	FALSE	Stable	Stable
DHX16	22.1116	22.188	22.2455	22.2053	22.2625	22.2312	O60231	O60231	DHX16_HUMAN	DHX16	Pre-mRNA-splicing factor ATP-dependent RNA helicase DHX16	O60231	FALSE	0	-0.0600963	0.162749	0.0513265	0.369239	0.299956	1.13876	FALSE	FALSE	Stable	Stable
DHX29	21.4112	21.4474	21.4441	21.2194	21.141	21.1437	Q7Z478	Q7Z478	DHX29_HUMAN	DHX29	ATP-dependent RNA helicase DHX29	Q7Z478	FALSE	0	-0.357066	-0.175437	-0.266252	0.00177299	0.000422151	-7.24773	FALSE	FALSE	Stable	Stable
DHX30	22.5995	22.5929	22.57	22.7902	22.8369	22.8217	Q7L2E3	Q7L2E3	DHX30_HUMAN	DHX30	ATP-dependent RNA helicase DHX30	Q7L2E3	FALSE	0	0.151208	0.306353	0.22878	0.00173337	0.000409179	7.29084	FALSE	FALSE	Stable	Stable
DHX32	16.0658	16.1643	17.3139	18.1765	18.1324	18.2266	Q7L7V1	Q7L7V1	DHX32_HUMAN	DHX32	Putative pre-mRNA-splicing factor ATP-dependent RNA helicase DHX32	Q7L7V1	TRUE	2	0.833482	2.49412	1.6638	0.00785543	0.00288623	4.9536	TRUE	TRUE	Up	Up
DHX33	20.3262	20.3516	20.2543	21.2766	21.3585	21.2932	Q9H6R0	Q9H6R0	DHX33_HUMAN	DHX33	ATP-dependent RNA helicase DHX33	Q9H6R0	FALSE	0	0.893165	1.10422	0.998693	2.79803e-05	6.26988e-07	23.3952	TRUE	TRUE	Up	Up
DHX34	19.4263	19.4218	19.4742	19.8702	19.8045	19.7741	Q14147	Q14147	DHX34_HUMAN	DHX34	Probable ATP-dependent RNA helicase DHX34	Q14147	FALSE	0	0.278119	0.472875	0.375497	0.00062603	9.69883e-05	9.53258	FALSE	FALSE	Stable	Stable
DHX35	19.989	19.8694	20.061	20.3893	20.4565	20.4356	Q9H5Z1	Q9H5Z1	DHX35_HUMAN	DHX35	Probable ATP-dependent RNA helicase DHX35	Q9H5Z1	FALSE	0	0.3133	0.594736	0.454018	0.00121097	0.000254095	7.97603	FALSE	FALSE	Stable	Stable
DHX36	21.5826	21.6643	21.5763	22.3363	22.4261	22.376	Q9H2U1	Q9H2U1	DHX36_HUMAN	DHX36	ATP-dependent DNA/RNA helicase DHX36	Q9H2U1	FALSE	0	0.666134	0.877308	0.771721	6.49576e-05	2.72713e-06	18.0681	TRUE	TRUE	Up	Up
DHX37	21.3972	21.4007	21.4213	21.5897	21.6249	21.6853	Q8IY37	Q8IY37	DHX37_HUMAN	DHX37	Probable ATP-dependent RNA helicase DHX37	Q8IY37	FALSE	0	0.135101	0.318675	0.226888	0.00344913	0.00102119	6.11077	FALSE	FALSE	Stable	Stable
DHX38	20.9338	20.8468	20.8852	21.0218	20.9079	21.0038	Q92620	Q92620	PRP16_HUMAN	DHX38	Pre-mRNA-splicing factor ATP-dependent RNA helicase PRP16	Q92620	FALSE	0	-0.0242492	0.202679	0.089215	0.148301	0.101948	1.94376	FALSE	FALSE	Stable	Stable
DHX40	20.4	20.1815	20.2118	20.4445	20.4358	20.4176	Q8IX18	Q8IX18	DHX40_HUMAN	DHX40	Probable ATP-dependent RNA helicase DHX40	Q8IX18	FALSE	0	0.0102215	0.326233	0.168227	0.0680134	0.0405015	2.63201	FALSE	FALSE	Stable	Stable
DHX57	21.8347	21.802	21.8412	21.7055	21.7163	21.7611	Q6P158	Q6P158	DHX57_HUMAN	DHX57	Putative ATP-dependent RNA helicase DHX57	Q6P158	FALSE	0	-0.180397	-0.0163428	-0.0983697	0.0470706	0.0264051	-2.96462	FALSE	FALSE	Stable	Stable
DHX58	17.8793	17.9084	18.1071	18.8093	18.5787	18.9829	Q96C10	Q96C10	DHX58_HUMAN	DHX58	ATP-dependent RNA helicase DHX58	Q96C10	FALSE	0	0.534175	1.11664	0.825409	0.00201513	0.000504236	7.00634	TRUE	TRUE	Up	Up
DHX8	20.5044	20.5375	20.5176	20.6412	20.5631	20.5014	Q14562	Q14562	DHX8_HUMAN	DHX8	ATP-dependent RNA helicase DHX8	Q14562	FALSE	0	-0.0618191	0.159273	0.0487268	0.389048	0.319355	1.08966	FALSE	FALSE	Stable	Stable
DHX9	25.2416	25.282	25.2468	25.2966	25.2942	25.2793	Q08211	Q08211	DHX9_HUMAN	DHX9	ATP-dependent RNA helicase A	Q08211	FALSE	0	-0.0421775	0.108608	0.0332152	0.389257	0.319577	1.08911	FALSE	FALSE	Stable	Stable
DIABLO	23.7875	23.8594	23.8186	23.8195	23.8449	23.8112	Q9NR28	Q9NR28	DBLOH_HUMAN	DIABLO	Diablo IAP-binding mitochondrial protein	Q9NR28	FALSE	0	-0.0812512	0.0878789	0.00331384	0.940401	0.92611	0.0968734	FALSE	FALSE	Stable	Stable
DIAPH1	23.8323	23.7281	23.7592	24.1151	24.1047	24.0974	O60610	O60610	DIAP1_HUMAN	DIAPH1	Protein diaphanous homolog 1	O60610	FALSE	0	0.237421	0.427623	0.332522	0.000894987	0.00016501	8.64371	FALSE	FALSE	Stable	Stable
DIAPH2	20.0944	20.1633	20.0642	20.5141	20.4125	20.4733	O60879	O60879	DIAP2_HUMAN	DIAPH2	Protein diaphanous homolog 2	O60879	FALSE	0	0.248708	0.469903	0.359305	0.00118017	0.000244904	8.03122	FALSE	FALSE	Stable	Stable
DIAPH3	22.5474	22.583	22.5997	22.2512	22.27	22.1861	Q9NSV4	Q9NSV4	DIAP3_HUMAN	DIAPH3	Protein diaphanous homolog 3	Q9NSV4	FALSE	0	-0.433819	-0.248048	-0.340933	0.000750295	0.000126869	-9.07373	FALSE	FALSE	Stable	Stable
DICER1	18.9094	18.8772	18.7668	19.4606	19.5568	19.366	Q9UPY3	Q9UPY3	DICER_HUMAN	DICER1	Endoribonuclease Dicer	Q9UPY3	FALSE	0	0.449778	0.770204	0.609991	0.000655722	0.000103953	9.41216	TRUE	TRUE	Up	Up
DIDO1	21.3862	21.3907	21.4341	21.2578	21.2711	21.2612	Q9BTC0	Q9BTC0	DIDO1_HUMAN	DIDO1	Death-inducer obliterator 1	Q9BTC0	FALSE	0	-0.217333	-0.0632953	-0.140314	0.0112608	0.00452461	-4.50369	FALSE	FALSE	Stable	Stable
DIMT1	20.8526	20.7053	20.8462	20.6801	20.467	20.4556	Q9UNQ2	Q9UNQ2	DIM1_HUMAN	DIMT1	Probable dimethyladenosine transferase	Q9UNQ2	FALSE	0	-0.460356	-0.073968	-0.267162	0.0296407	0.0151124	-3.41857	FALSE	FALSE	Stable	Stable
DIP2A	19.7174	19.562	19.6732	18.9333	18.6813	18.8898	Q14689	Q14689;Q9Y2E4	DIP2A_HUMAN	DIP2A	Disco-interacting protein 2 homolog A	Q14689	FALSE	0	-1.0151	-0.617038	-0.816068	0.000495973	6.93021e-05	-10.1361	TRUE	TRUE	Down	Down
DIP2B	20.2722	20.1622	20.26	20.2025	20.0223	20.0819	Q9P265	Q9P265	DIP2B_HUMAN	DIP2B	Disco-interacting protein 2 homolog B	Q9P265	FALSE	0	-0.277388	0.0188885	-0.12925	0.115788	0.0763108	-2.15688	FALSE	FALSE	Stable	Stable
DIPK1A	17.8366	17.8288	17.7539	17.4462	17.3383	17.1848	Q5T7M9	Q5T7M9	DIK1A_HUMAN	DIPK1A	Divergent protein kinase domain 1A	Q5T7M9	FALSE	0	-0.66286	-0.30374	-0.4833	0.00247689	0.000659654	-6.65383	FALSE	FALSE	Stable	Stable
DIPK2A	18.8185	18.4645	18.6271	20.013	19.7801	19.9485	Q8NDZ4	Q8NDZ4	DIK2A_HUMAN	DIPK2A	Divergent protein kinase domain 2A	Q8NDZ4	FALSE	0	1.01302	1.5413	1.27716	0.00026965	2.78505e-05	11.953	TRUE	TRUE	Up	Up
DIRAS2	23.8457	23.8947	23.8728	24.7101	24.8081	24.6715	Q96HU8	Q96HU8	DIRA2_HUMAN	DIRAS2	GTP-binding protein Di-Ras2	Q96HU8	FALSE	0	0.745916	0.971714	0.858815	5.64505e-05	2.17369e-06	18.805	TRUE	TRUE	Up	Up
DIS3	21.8581	21.834	21.8233	21.8016	21.7789	21.762	Q9Y2L1	Q9Y2L1	RRP44_HUMAN	DIS3	Exosome complex exonuclease RRP44	Q9Y2L1	FALSE	0	-0.134292	0.0191094	-0.0575911	0.164126	0.114878	-1.85619	FALSE	FALSE	Stable	Stable
DIS3L	20.1921	20.0861	20.0623	19.2724	19.1953	19.2384	Q8TF46	Q8TF46	DI3L1_HUMAN	DIS3L	DIS3-like exonuclease 1	Q8TF46	FALSE	0	-0.995373	-0.76093	-0.878151	5.95828e-05	2.37103e-06	-18.5193	TRUE	TRUE	Down	Down
DIS3L2	21.0203	20.9547	21.0029	20.8036	20.8019	20.7798	Q8IYB7	Q8IYB7	DI3L2_HUMAN	DIS3L2	DIS3-like exonuclease 2	Q8IYB7	FALSE	0	-0.279733	-0.11531	-0.197521	0.00385631	0.00117949	-5.93946	FALSE	FALSE	Stable	Stable
DKC1	21.916	21.939	21.9094	22.0433	22.1221	22.104	O60832	O60832	DKC1_HUMAN	DKC1	H/ACA ribonucleoprotein complex subunit DKC1	O60832	FALSE	0	0.0809676	0.255653	0.16831	0.00909871	0.00347741	4.76374	FALSE	FALSE	Stable	Stable
DKK1	22.183	22.2815	22.0689	22.0736	22.1365	22.0387	O94907	O94907	DKK1_HUMAN	DKK1	Dickkopf-related protein 1	O94907	FALSE	0	-0.250971	0.0611902	-0.0948906	0.246551	0.185588	-1.50293	FALSE	FALSE	Stable	Stable
DKK3	19.7466	20.0053	19.8292	20.4128	20.7287	20.5224	Q9UBP4	Q9UBP4	DKK3_HUMAN	DKK3	Dickkopf-related protein 3	Q9UBP4	FALSE	0	0.437399	0.951178	0.694289	0.00244596	0.000645746	6.68125	TRUE	TRUE	Up	Up
DLAT	24.0971	24.0522	24.0828	24.2803	24.3389	24.2679	P10515	P10515	ODP2_HUMAN	DLAT	Dihydrolipoyllysine-residue acetyltransferase component of pyruvate dehydrogenase complex, mitochondrial	P10515	FALSE	0	0.130844	0.305801	0.218322	0.00332531	0.000972535	6.16965	FALSE	FALSE	Stable	Stable
DLC1	19.7445	19.7292	19.5565	19.5989	19.4576	19.4991	Q96QB1	Q96QB1	RHG07_HUMAN	DLC1	Rho GTPase-activating protein 7	Q96QB1	FALSE	0	-0.324848	0.00841967	-0.158214	0.0934356	0.0590575	-2.34718	FALSE	FALSE	Stable	Stable
DLD	22.6531	22.633	22.377	22.8119	22.6488	22.6626	P09622	P09622	DLDH_HUMAN	DLD	Dihydrolipoyl dehydrogenase, mitochondrial	P09622	FALSE	0	-0.0702082	0.376989	0.15339	0.197752	0.142921	1.69587	FALSE	FALSE	Stable	Stable
DLG1	22.324	22.142	22.2481	21.8347	21.8285	21.7506	Q12959	Q12959	DLG1_HUMAN	DLG1	Disks large homolog 1	Q12959	FALSE	0	-0.574225	-0.292726	-0.433475	0.00146175	0.000325482	-7.61347	FALSE	FALSE	Stable	Stable
DLG3	18.3487	16.8186	17.9176	17.4492	16.2655	16.3286	Q92796	Q92796	DLG3_HUMAN	DLG3	Disks large homolog 3	Q92796	TRUE	1	-2.2441	0.216323	-1.01389	0.132865	0.0897459	-2.03739	FALSE	FALSE	Stable	Stable
DLG5	19.5947	19.4551	19.4676	18.9287	19.2601	19.3199	Q8TDM6	Q8TDM6	DLG5_HUMAN	DLG5	Disks large homolog 5	Q8TDM6	FALSE	0	-0.612184	-0.0602697	-0.336227	0.0447309	0.0248753	-3.012	FALSE	FALSE	Stable	Stable
DLGAP4	21.1213	21.3698	21.2287	21.3208	21.3767	21.3902	Q9Y2H0	O14490;Q9P1A6;Q9Y2H0	DLGP4_HUMAN	DLGAP4	Disks large-associated protein 4	Q9Y2H0	FALSE	0	-0.0469366	0.292231	0.122647	0.177695	0.126091	1.78788	FALSE	FALSE	Stable	Stable
DLGAP5	21.9898	22.0298	21.9575	21.7432	21.8091	21.8047	Q15398	Q15398	DLGP5_HUMAN	DLGAP5	Disks large-associated protein 5	Q15398	FALSE	0	-0.299756	-0.113659	-0.206707	0.00526762	0.00174547	-5.49178	FALSE	FALSE	Stable	Stable
DLST	24.5591	24.6559	24.7459	24.4508	24.4186	24.439	P36957	P36957	ODO2_HUMAN	DLST	Dihydrolipoyllysine-residue succinyltransferase component of 2-oxoglutarate dehydrogenase complex, mitochondrial	P36957	FALSE	0	-0.350185	-0.0848736	-0.217529	0.0164556	0.00730064	-4.05374	FALSE	FALSE	Stable	Stable
DMAC1	18.7359	18.5697	18.8933	19.167	18.9368	19.2482	Q96GE9	Q96GE9	DMAC1_HUMAN	DMAC1	Distal membrane-arm assembly complex protein 1	Q96GE9	FALSE	0	0.103604	0.665211	0.384408	0.0306698	0.0157477	3.38418	FALSE	FALSE	Stable	Stable
DMAC2	21.2662	20.9377	21.0816	21.1176	21.1106	21.2039	Q9NW81	Q9NW81	DMAC2_HUMAN	DMAC2	Distal membrane-arm assembly complex protein 2	Q9NW81	FALSE	0	-0.168135	0.265783	0.0488241	0.658295	0.598933	0.556313	FALSE	FALSE	Stable	Stable
DMAC2L	20.6796	20.6987	20.7133	20.4311	20.3308	20.3419	Q99766	Q99766	ATP5S_HUMAN	DMAC2L	ATP synthase subunit s, mitochondrial	Q99766	FALSE	0	-0.427063	-0.231485	-0.329274	0.00102728	0.000202149	-8.32395	FALSE	FALSE	Stable	Stable
DMAP1	22.2855	22.1591	22.251	22.1918	22.1793	22.2239	Q9NPF5	Q9NPF5	DMAP1_HUMAN	DMAP1	DNA methyltransferase 1-associated protein 1	Q9NPF5	FALSE	0	-0.14149	0.0744447	-0.0335225	0.542087	0.473043	-0.767553	FALSE	FALSE	Stable	Stable
DMD	22.3356	22.3355	22.2644	22.2939	22.051	22.1174	P11532	P11532	DMD_HUMAN	DMD	Dystrophin	P11532	FALSE	0	-0.329634	0.0142213	-0.157706	0.102271	0.0657158	-2.2676	FALSE	FALSE	Stable	Stable
DMTN	17.6995	17.8405	17.7279	17.4571	16.0492	17.3582	Q08495	Q08495	DEMA_HUMAN	DMTN	Dematin	Q08495	TRUE	1	-1.7428	0.140497	-0.801152	0.123114	0.0820654	-2.10325	FALSE	FALSE	Stable	Stable
DMWD	16.0368	16.026	15.9445	15.3993	15.9394	15.8042	Q09019	Q09019	DMWD_HUMAN	DMWD	Dystrophia myotonica WD repeat-containing protein	Q09019	FALSE	0	-0.634858	0.0586725	-0.288093	0.130404	0.0877643	-2.05381	FALSE	FALSE	Stable	Stable
DMXL1	20.4455	20.5254	20.4709	20.6807	20.5345	20.6576	Q9Y485	Q9Y485	DMXL1_HUMAN	DMXL1	DmX-like protein 1	Q9Y485	FALSE	0	0.0172255	0.270072	0.143649	0.0558348	0.0321994	2.80892	FALSE	FALSE	Stable	Stable
DMXL2	19.0144	19.0145	19.227	19.3093	19.3603	19.1529	Q8TDJ6	Q8TDJ6	DMXL2_HUMAN	DMXL2	DmX-like protein 2	Q8TDJ6	FALSE	0	-0.0177501	0.395527	0.188889	0.103187	0.0664154	2.25974	FALSE	FALSE	Stable	Stable
DNA2	18.1168	17.8875	18.2415	18.4289	18.44	18.3954	P51530	P51530	DNA2_HUMAN	DNA2	DNA replication ATP-dependent helicase/nuclease DNA2	P51530	FALSE	0	0.113075	0.565914	0.339495	0.0224805	0.010781	3.70667	FALSE	FALSE	Stable	Stable
DNAAF10	20.3766	20.4916	20.3494	20.3265	20.235	20.3082	Q96MX6	Q96MX6	DAA10_HUMAN	DNAAF10	Dynein axonemal assembly factor 10	Q96MX6	FALSE	0	-0.2435	0.0115436	-0.115978	0.104513	0.0674457	-2.24831	FALSE	FALSE	Stable	Stable
DNAAF2	15.2724	13.8706	15.1118	14.4288	14.3883	14.2187	Q9NVR5	Q9NVR5	KTU_HUMAN	DNAAF2	Protein kintoun	Q9NVR5	FALSE	0	-1.3312	0.518612	-0.406295	0.390763	0.320863	-1.08594	FALSE	FALSE	Stable	Stable
DNAAF5	21.5092	21.4603	21.4759	21.5854	21.5039	21.578	Q86Y56	Q86Y56	DAAF5_HUMAN	DNAAF5	Dynein axonemal assembly factor 5	Q86Y56	FALSE	0	-0.0189508	0.166885	0.073967	0.144123	0.0986497	1.9679	FALSE	FALSE	Stable	Stable
DNAJA1	23.7792	23.9148	23.7909	24.0854	24.3357	24.2212	P31689	P31689	DNJA1_HUMAN	DNAJA1	DnaJ homolog subfamily A member 1	P31689	FALSE	0	0.198435	0.573131	0.385783	0.00705143	0.00253089	5.09047	FALSE	FALSE	Stable	Stable
DNAJA2	22.991	23.0749	23.0894	23.2282	23.2675	23.2034	O60884	O60884	DNJA2_HUMAN	DNAJA2	DnaJ homolog subfamily A member 2	O60884	FALSE	0	0.0795099	0.282993	0.181251	0.0122102	0.00501773	4.404	FALSE	FALSE	Stable	Stable
DNAJA3	22.7753	22.6579	22.6443	23.1211	23.0567	23.0925	Q96EY1	Q96EY1	DNJA3_HUMAN	DNAJA3	DnaJ homolog subfamily A member 3, mitochondrial	Q96EY1	FALSE	0	0.280614	0.514662	0.397638	0.000990625	0.000192512	8.39994	FALSE	FALSE	Stable	Stable
DNAJA4	18.8999	18.3188	18.3348	18.3903	18.9244	18.3718	Q8WW22	Q8WW22	DNJA4_HUMAN	DNAJA4	DnaJ homolog subfamily A member 4	Q8WW22	FALSE	0	-0.502754	0.591393	0.0443195	0.876068	0.848156	0.200269	FALSE	FALSE	Stable	Stable
DNAJB1	23.2826	23.1606	23.1337	23.3001	23.2877	23.2526	P25685	P25685;Q9UDY4	DNJB1_HUMAN	DNAJB1	DnaJ homolog subfamily B member 1	P25685	FALSE	0	-0.0332612	0.208814	0.0877763	0.17687	0.125255	1.79276	FALSE	FALSE	Stable	Stable
DNAJB11	22.9521	22.9868	23.0465	23.3715	23.2696	23.2494	Q9UBS4	Q9UBS4	DJB11_HUMAN	DNAJB11	DnaJ homolog subfamily B member 11	Q9UBS4	FALSE	0	0.182664	0.420679	0.301671	0.00313748	0.000898213	6.26648	FALSE	FALSE	Stable	Stable
DNAJB12	21.6095	21.672	21.5484	21.8469	21.8367	21.7741	Q9NXW2	Q9NXW2	DJB12_HUMAN	DNAJB12	DnaJ homolog subfamily B member 12	Q9NXW2	FALSE	0	0.0975791	0.320972	0.209276	0.0101203	0.00396991	4.63173	FALSE	FALSE	Stable	Stable
DNAJB14	19.3459	19.34	19.1791	19.3392	19.2981	19.2197	Q8TBM8	Q8TBM8	DJB14_HUMAN	DNAJB14	DnaJ homolog subfamily B member 14	Q8TBM8	FALSE	0	-0.153556	0.148211	-0.00267272	0.972185	0.966551	-0.0437901	FALSE	FALSE	Stable	Stable
DNAJB2	22.5486	22.562	22.515	21.9388	21.8918	21.9878	P25686	O75190;P25686;Q8NHS0	DNJB2_HUMAN	DNAJB2	DnaJ homolog subfamily B member 2	P25686	FALSE	0	-0.697101	-0.507721	-0.602411	0.000102041	5.97925e-06	-15.7272	TRUE	TRUE	Down	Down
DNAJB4	23.2374	23.2498	23.2879	23.1087	23.1422	23.0776	Q9UDY4	Q9UDY4	DNJB4_HUMAN	DNAJB4	DnaJ homolog subfamily B member 4	Q9UDY4	FALSE	0	-0.23448	-0.0632291	-0.148855	0.0133603	0.00561255	-4.29757	FALSE	FALSE	Stable	Stable
DNAJB5	18.1471	17.9067	17.8314	17.5763	17.8505	17.9177	O75953	O75953	DNJB5_HUMAN	DNAJB5	DnaJ homolog subfamily B member 5	O75953	FALSE	0	-0.479617	0.119197	-0.18021	0.250589	0.18937	-1.48793	FALSE	FALSE	Stable	Stable
DNAJB6	22.8036	22.7674	22.8802	23.1195	23.2728	23.3942	O75190	O75190	DNJB6_HUMAN	DNAJB6	DnaJ homolog subfamily B member 6	O75190	FALSE	0	0.254289	0.635904	0.445096	0.00434257	0.00136848	5.76663	FALSE	FALSE	Stable	Stable
DNAJC1	20.903	20.8951	20.7235	20.7862	20.791	20.8224	Q96KC8	Q96KC8	DNJC1_HUMAN	DNAJC1	DnaJ homolog subfamily C member 1	Q96KC8	FALSE	0	-0.18201	0.100699	-0.0406555	0.572015	0.504847	-0.711008	FALSE	FALSE	Stable	Stable
DNAJC10	22.5369	22.4954	22.4899	21.9547	21.8218	21.8647	Q8IXB1	Q8IXB1	DJC10_HUMAN	DNAJC10	DnaJ homolog subfamily C member 10	Q8IXB1	FALSE	0	-0.73802	-0.515997	-0.627009	0.00015669	1.16836e-05	-13.9627	TRUE	TRUE	Down	Down
DNAJC11	21.7255	21.7983	21.7108	21.7722	21.7402	21.7244	Q9NVH1	Q9NVH1	DJC11_HUMAN	DNAJC11	DnaJ homolog subfamily C member 11	Q9NVH1	FALSE	0	-0.0931806	0.0946843	0.000751857	0.988573	0.984881	0.0197872	FALSE	FALSE	Stable	Stable
DNAJC12	15.028	14.9868	15.3131	16.0236	15.898	16.0884	Q9UKB3	Q9UKB3	DJC12_HUMAN	DNAJC12	DnaJ homolog subfamily C member 12	Q9UKB3	TRUE	3	0.643401	1.14468	0.894039	0.000832012	0.000148128	8.81806	TRUE	TRUE	Up	Up
DNAJC13	21.6777	21.6761	21.6879	21.6047	21.5381	21.4949	O75165	O75165	DJC13_HUMAN	DNAJC13	DnaJ homolog subfamily C member 13	O75165	FALSE	0	-0.230913	-0.038463	-0.134688	0.0285372	0.0143807	-3.46023	FALSE	FALSE	Stable	Stable
DNAJC14	17.4537	17.0635	17.4455	17.1109	16.9695	17.2272	Q6Y2X3	Q6Y2X3	DJC14_HUMAN	DNAJC14	DnaJ homolog subfamily C member 14	Q6Y2X3	FALSE	0	-0.532683	0.0959626	-0.21836	0.193017	0.138803	-1.71736	FALSE	FALSE	Stable	Stable
DNAJC15	19.4507	19.482	19.4406	19.9298	19.7435	19.6559	Q9Y5T4	Q9Y5T4	DJC15_HUMAN	DNAJC15	DnaJ homolog subfamily C member 15	Q9Y5T4	FALSE	0	0.136362	0.500908	0.318635	0.0130931	0.00547208	4.32151	FALSE	FALSE	Stable	Stable
DNAJC16	18.7122	18.5781	18.9037	19.4697	19.351	19.3398	Q9Y2G8	Q9Y2G8	DJC16_HUMAN	DNAJC16	DnaJ homolog subfamily C member 16	Q9Y2G8	FALSE	0	0.431643	0.87934	0.655491	0.00178129	0.000424848	7.23896	TRUE	TRUE	Up	Up
DNAJC17	21.2439	21.3115	21.2867	21.0233	21.1213	21.0986	Q9NVM6	Q9NVM6	DJC17_HUMAN	DNAJC17	DnaJ homolog subfamily C member 17	Q9NVM6	FALSE	0	-0.300822	-0.0983572	-0.199589	0.00835716	0.003119	-4.87397	FALSE	FALSE	Stable	Stable
DNAJC19	22.1177	22.1017	22.0246	22.6092	22.6579	22.7703	Q96DA6	Q96DA6	TIM14_HUMAN	DNAJC19	Mitochondrial import inner membrane translocase subunit TIM14	Q96DA6	FALSE	0	0.463516	0.732134	0.597825	0.000367888	4.40773e-05	11.0036	TRUE	TRUE	Up	Up
DNAJC2	21.7344	21.923	21.6934	21.9861	22.0827	22.1139	Q99543	Q99543	DNJC2_HUMAN	DNAJC2	DnaJ homolog subfamily C member 2	Q99543	FALSE	0	0.0973481	0.457294	0.277321	0.0204225	0.00958924	3.80925	FALSE	FALSE	Stable	Stable
DNAJC21	18.6827	18.7589	18.9735	18.5245	18.9017	18.8895	Q5F1R6	Q5F1R6	DJC21_HUMAN	DNAJC21	DnaJ homolog subfamily C member 21	Q5F1R6	FALSE	0	-0.352656	0.286383	-0.0331366	0.842125	0.806575	-0.256374	FALSE	FALSE	Stable	Stable
DNAJC25	18.3789	18.3185	18.1892	18.0719	17.8419	17.7702	Q9H1X3	Q9H1X3	DJC25_HUMAN	DNAJC25	DnaJ homolog subfamily C member 25	Q9H1X3	FALSE	0	-0.631784	-0.16997	-0.400877	0.0134221	0.00564712	-4.29178	FALSE	FALSE	Stable	Stable
DNAJC3	21.6563	21.6166	21.5688	21.6193	21.5254	21.5542	Q13217	Q13217	DNJC3_HUMAN	DNAJC3	DnaJ homolog subfamily C member 3	Q13217	FALSE	0	-0.151801	0.0566777	-0.0475618	0.373321	0.304138	-1.12795	FALSE	FALSE	Stable	Stable
DNAJC30	19.6425	19.5102	19.4888	19.7247	19.5469	19.4975	Q96LL9	Q96LL9	DJC30_HUMAN	DNAJC30	DnaJ homolog subfamily C member 30, mitochondrial	Q96LL9	FALSE	0	-0.144283	0.229328	0.0425223	0.654611	0.594841	0.562717	FALSE	FALSE	Stable	Stable
DNAJC5	20.5024	20.6015	20.5277	20.9744	20.7027	20.8847	Q9H3Z4	Q9H3Z4	DNJC5_HUMAN	DNAJC5	DnaJ homolog subfamily C member 5	Q9H3Z4	FALSE	0	0.121037	0.499118	0.310077	0.0164429	0.00729145	4.05489	FALSE	FALSE	Stable	Stable
DNAJC6	18.6908	18.7205	18.8004	18.7602	18.7799	18.8195	O75061	O75061	AUXI_HUMAN	DNAJC6	Putative tyrosine-protein phosphatase auxilin	O75061	FALSE	0	-0.0542334	0.15279	0.0492781	0.354371	0.285596	1.17687	FALSE	FALSE	Stable	Stable
DNAJC7	23.137	23.1477	23.1201	23.591	23.5672	23.5694	Q99615	Q99615	DNJC7_HUMAN	DNAJC7	DnaJ homolog subfamily C member 7	Q99615	FALSE	0	0.367465	0.514359	0.440912	0.000124153	8.29369e-06	14.8403	FALSE	FALSE	Stable	Stable
DNAJC8	25.005	25.0169	24.9564	25.0374	25.125	25.0446	O75937	O75937	DNJC8_HUMAN	DNAJC8	DnaJ homolog subfamily C member 8	O75937	FALSE	0	-0.0221274	0.174609	0.0762408	0.153044	0.105879	1.916	FALSE	FALSE	Stable	Stable
DNAJC9	23.1945	23.1973	23.2854	23.1925	23.1985	23.1546	Q8WXX5	Q8WXX5	DNJC9_HUMAN	DNAJC9	DnaJ homolog subfamily C member 9	Q8WXX5	FALSE	0	-0.14115	0.0533516	-0.0438993	0.378098	0.308857	-1.11591	FALSE	FALSE	Stable	Stable
DNAL1	18.9562	19.0281	19.1503	18.5252	18.4668	18.3021	Q4LDG9	Q4LDG9	DNAL1_HUMAN	DNAL1	Dynein axonemal light chain 1	Q4LDG9	FALSE	0	-0.806986	-0.419956	-0.613471	0.00129464	0.000279102	-7.83689	TRUE	TRUE	Down	Down
DNASE2	22.0845	22.2004	22.172	22.0231	22.2534	22.2208	O00115	O00115	DNS2A_HUMAN	DNASE2	Deoxyribonuclease-2-alpha	O00115	FALSE	0	-0.165505	0.192365	0.01343	0.88457	0.859166	0.185543	FALSE	FALSE	Stable	Stable
DNLZ	18.7641	18.907	18.9656	19.9628	20.1265	20.0408	Q5SXM8	Q5SXM8	DNLZ_HUMAN	DNLZ	DNL-type zinc finger protein	Q5SXM8	FALSE	0	0.992532	1.33647	1.1645	8.38841e-05	4.20231e-06	16.7401	TRUE	TRUE	Up	Up
DNM1	22.4992	22.5663	22.5526	23.436	23.4014	23.4817	Q05193	Q05193	DYN1_HUMAN	DNM1	Dynamin-1	Q05193	FALSE	0	0.805746	0.994961	0.900353	2.76666e-05	6.07322e-07	23.5262	TRUE	TRUE	Up	Up
DNM1L	23.8102	23.8325	23.8742	23.9514	23.9514	24.0279	O00429	O00429	DNM1L_HUMAN	DNM1L	Dynamin-1-like protein	O00429	FALSE	0	0.0424271	0.23349	0.137958	0.0256283	0.0126343	3.56998	FALSE	FALSE	Stable	Stable
DNM2	24.2483	24.2117	24.2261	24.4669	24.4059	24.3988	P50570	P50570;Q9UQ16	DYN2_HUMAN	DNM2	Dynamin-2	P50570	FALSE	0	0.109516	0.280855	0.195185	0.00476874	0.00153963	5.63229	FALSE	FALSE	Stable	Stable
DNM3	23.464	23.3394	23.1933	23.7137	23.7913	23.779	Q9UQ16	Q9UQ16	DYN3_HUMAN	DNM3	Dynamin-3	Q9UQ16	FALSE	0	0.246651	0.611669	0.42916	0.00420769	0.0013146	5.81297	FALSE	FALSE	Stable	Stable
DNMBP	21.0367	20.9684	21.0606	21.4806	21.4661	21.4421	Q6XZF7	Q6XZF7	DNMBP_HUMAN	DNMBP	Dynamin-binding protein	Q6XZF7	FALSE	0	0.348007	0.534005	0.441006	0.000289618	3.10318e-05	11.7227	FALSE	FALSE	Stable	Stable
DNMT1	22.5031	22.4907	22.512	22.2631	22.2757	22.289	P26358	P26358	DNMT1_HUMAN	DNMT1	DNA (cytosine-5)-methyltransferase 1	P26358	FALSE	0	-0.298618	-0.153355	-0.225986	0.0013983	0.000308291	-7.6917	FALSE	FALSE	Stable	Stable
DNMT3A	18.9296	18.8939	18.8799	18.2383	18.001	18.0825	Q9Y6K1	Q9Y6K1	DNM3A_HUMAN	DNMT3A	DNA (cytosine-5)-methyltransferase 3A	Q9Y6K1	FALSE	0	-0.95632	-0.631484	-0.793902	0.00025953	2.62165e-05	-12.0836	TRUE	TRUE	Down	Down
DNMT3B	17.9565	18.0072	17.8926	16.4179	16.4397	16.4814	Q9UBC3	Q9UBC3	DNM3B_HUMAN	DNMT3B	DNA (cytosine-5)-methyltransferase 3B	Q9UBC3	FALSE	0	-1.61073	-1.40079	-1.50576	7.90522e-06	5.80293e-08	-35.4617	TRUE	TRUE	Down	Down
DNPEP	22.3801	22.2858	22.1774	22.1342	22.1416	22.0286	Q9ULA0	Q9ULA0	DNPEP_HUMAN	DNPEP	Aspartyl aminopeptidase	Q9ULA0	FALSE	0	-0.338091	-0.0212594	-0.179675	0.0561459	0.0324102	-2.80384	FALSE	FALSE	Stable	Stable
DNPH1	20.6317	20.389	20.4346	20.5483	20.6591	20.8583	O43598	O43598	DNPH1_HUMAN	DNPH1	2'-deoxynucleoside 5'-phosphate N-hydrolase 1	O43598	FALSE	0	-0.0481672	0.455158	0.203495	0.138995	0.0945666	1.99894	FALSE	FALSE	Stable	Stable
DNTTIP1	21.6089	21.6269	21.5749	21.5539	21.5962	21.5995	Q9H147	Q9H147	TDIF1_HUMAN	DNTTIP1	Deoxynucleotidyltransferase terminal-interacting protein 1	Q9H147	FALSE	0	-0.102692	0.0619645	-0.0203638	0.626433	0.564234	-0.611468	FALSE	FALSE	Stable	Stable
DNTTIP2	21.0349	21.1419	21.0846	21.3722	21.3638	21.4286	Q5QJE6	Q5QJE6	TDIF2_HUMAN	DNTTIP2	Deoxynucleotidyltransferase terminal-interacting protein 2	Q5QJE6	FALSE	0	0.197666	0.404466	0.301066	0.00182065	0.000437753	7.19788	FALSE	FALSE	Stable	Stable
DOCK1	23.9293	24.0081	24.0665	23.7049	23.7011	23.6439	Q14185	Q14185	DOCK1_HUMAN	DOCK1	Dedicator of cytokinesis protein 1	Q14185	FALSE	0	-0.433077	-0.202955	-0.318016	0.00223066	0.000574829	-6.83258	FALSE	FALSE	Stable	Stable
DOCK10	20.9043	20.9094	20.8829	20.611	20.7771	20.6616	Q96BY6	Q96BY6;Q9BZ29;Q5JSL3	DOC10_HUMAN	DOCK10	Dedicator of cytokinesis protein 10	Q96BY6	FALSE	0	-0.339767	-0.0914866	-0.215627	0.0134039	0.00563428	-4.29393	FALSE	FALSE	Stable	Stable
DOCK11	18.7296	18.8283	18.8879	18.4558	18.5701	18.6343	Q5JSL3	Q5JSL3	DOC11_HUMAN	DOCK11	Dedicator of cytokinesis protein 11	Q5JSL3	FALSE	0	-0.421471	-0.102198	-0.261834	0.0164429	0.00729291	-4.0547	FALSE	FALSE	Stable	Stable
DOCK2	17.8881	17.303	16.6219	19.8971	19.7451	19.8186	Q92608	Q92608	DOCK2_HUMAN	DOCK2	Dedicator of cytokinesis protein 2	Q92608	FALSE	0	1.78678	3.31174	2.54926	0.00105272	0.000210002	8.26508	TRUE	TRUE	Up	Up
DOCK4	18.3189	18.3035	18.281	19.758	19.8152	19.7541	Q8N1I0	Q8N1I0	DOCK4_HUMAN	DOCK4	Dedicator of cytokinesis protein 4	Q8N1I0	FALSE	0	1.39072	1.55859	1.47465	3.8598e-06	1.81292e-08	43.4312	TRUE	TRUE	Up	Up
DOCK5	21.1964	21.1673	21.1968	20.8744	20.9434	21.0147	Q9H7D0	Q9H7D0	DOCK5_HUMAN	DOCK5	Dedicator of cytokinesis protein 5	Q9H7D0	FALSE	0	-0.353317	-0.131962	-0.242639	0.0055333	0.00186344	-5.41957	FALSE	FALSE	Stable	Stable
DOCK6	18.4606	18.5349	18.588	16.7951	17.0006	16.7125	Q96HP0	Q96HP0	DOCK6_HUMAN	DOCK6	Dedicator of cytokinesis protein 6	Q96HP0	FALSE	0	-1.89621	-1.48729	-1.69175	4.36867e-05	1.34781e-06	-20.4548	TRUE	TRUE	Down	Down
DOCK7	23.1935	23.2243	23.2091	23.4372	23.4271	23.4041	Q96N67	Q96N67	DOCK7_HUMAN	DOCK7	Dedicator of cytokinesis protein 7	Q96N67	FALSE	0	0.138917	0.288824	0.21387	0.00196335	0.000486728	7.05381	FALSE	FALSE	Stable	Stable
DOCK9	17.2994	18.0394	18.3629	18.3306	18.458	18.2143	Q9BZ29	Q9BZ29	DOCK9_HUMAN	DOCK9	Dedicator of cytokinesis protein 9	Q9BZ29	FALSE	0	-0.234443	1.10192	0.433739	0.219426	0.161751	1.60471	FALSE	FALSE	Stable	Stable
[truncated: 5,952 more rows]

## Sheet: Metascape_Enrichment
GroupID	Category	Term	Description	LogP	Log(q-value)	Genes	Symbols	InTerm_InList
[truncated: 515 more rows]

## Sheet: GSEA
HALLMARK
[truncated: 282 more rows]
