# Supplementary material for: Proteomic and metabolomic dissection of the BRAF V600E mutation-induced cellular state transition in lung epithelial cells
Source: Royal Society of Chemistry journal article supplement (doi:10.1039/d4mo00249k), 2025-04-22
Supplement: d4mo00249k8.xlsx [file d4mo00249k8.xlsx]

## Sheet: BEAS_2B_Metabolomics_NormData
Index	Compounds	Class I	Class II	Formula	Level	CAS	VE1	VE2	VE3	VE4	VE5	VE6	WT1	WT2	WT3	WT4	WT5	WT6	VIP	P-value	Fold_Change	Log2FC	Type
MEDP1203	(1R,6S)-6-amino-5-oxocyclohexyl-2-ene-1-carboxylic-acid-ester	Aldehyde,Ketones,Esters	Esters	C7H9NO3	2	-	2190000	2920000	2510000	2960000	3190000	2900000	2990000	3760000	3290000	3360000	3220000	3160000	1.26	0.0189	0.842	-0.247	down
MEDN2276	(24S)-24,25-dihydroxyvitamin D3	CoEnzyme and vitamins	CoEnzyme and vitamins	C27H44O3	2	55700-58-8	110000	47500	68600	14900	68600	57000	160000	172000	154000	157000	149000	116000	1.49	0.000276	0.404	-1.31	down
MEDN2099	(2s)-2-Amino-4-sulfinobutanoic acid	Amino acid and Its metabolites	Amino acid derivatives	C4H9NO4S	2	2686-70-6	42300	16900	29200	34200	47700	40400	59300	52300	47400	62000	42800	46800	1.19	0.014	0.678	-0.56	down
MEDP2334	(R)-(-)-1-Amino-2-propanol	Alcohol and amines	Amines	C3H9NO	1	2799-16-8	50500	40800	37100	46600	63200	77300	42100	43700	47300	47000	51700	57200	0.391	0.527	1.09	0.126	insig
MEDP1126*113	(R)-(-)-2-phenylglycine	Amino acid and Its metabolites	Amino acid derivatives	C8H11NO	2	56613-80-0	27000000	26500000	26500000	29900000	30200000	28200000	29100000	37900000	35600000	35000000	34400000	35200000	1.57	0.00155	0.813	-0.299	down
MEDP0823	(R)-2-Hydroxy-3-phenylpropionic acid	Organic acid and Its derivatives	Organic acid and Its derivatives	C9H10O3	2	7326-19-4	7030000	6820000	6780000	8020000	7480000	6910000	7020000	6780000	6850000	6560000	6750000	7230000	0.836	0.204	1.04	0.0631	insig
MEDN2091*004	(R)-2-Hydroxybutyric acid	Organic acid and Its derivatives	Organic acid and Its derivatives	C4H8O3	2	20016-85-7	171000	236000	217000	223000	201000	330000	333000	243000	276000	246000	257000	293000	0.96	0.121	0.836	-0.259	insig
MEDN0751	(±)12-HETE	FA	Oxidized lipids	C20H32O3	1	71030-37-0	33700	27600	28800	26900	34800	33800	68200	93100	70500	65000	55500	55700	1.81	0.000888	0.455	-1.14	down
MEDN0350	(±)15-HETE	FA	Oxidized lipids	C20H32O3	1	54845-95-3	59800	37100	63600	44700	36000	48200	165000	205000	114000	136000	125000	105000	1.79	0.00114	0.34	-1.55	down
MEDN0754	(±)17-HDHA	FA	Oxidized lipids	C22H32O3	2	90780-52-2	9500	9600	9050	10300	8310	9370	30700	32200	16200	19000	11600	13900	1.56	0.0257	0.454	-1.14	down
MEDN1448	(±)19(20)-EpDPE(A)	FA	Oxidized lipids	C22H32O3	2	-	27300	21600	27700	18800	24300	19500	132000	53900	127000	48100	40100	84100	1.66	0.0175	0.287	-1.8	down
MEDN0758	(±)4-HDHA	FA	Oxidized lipids	C22H32O3	2	90906-40-4	22600	22900	22400	25400	26600	16100	68200	76300	53000	55700	51700	47700	1.84	0.000253	0.386	-1.38	down
MEDN0760	(±)5-HETE	FA	Oxidized lipids	C20H32O3	2	70608-72-9	64300	49900	53200	57900	60200	62200	175000	211000	170000	154000	128000	124000	1.86	0.000497	0.361	-1.47	down
MEDN0763	(±)9-HETE	FA	Oxidized lipids	C20H32O3	1	79495-85-5	8130	6750	10400	7230	5120	9080	21000	30700	25200	19900	16200	18800	1.78	0.000636	0.354	-1.5	down
MEDP0281	1,3-Diaminopropane	Alcohol and amines	Amines	C3H10N2	2	109-76-2	86700	129000	116000	117000	115000	69600	119000	137000	153000	156000	112000	110000	1.1	0.064	0.804	-0.315	insig
MEDP1212	1,3-Dicyclohexylurea	Alcohol and amines	Polyamines	C13H24N2O	2	2387-23-7	105000	93300	118000	129000	139000	131000	143000	155000	124000	115000	119000	119000	0.579	0.324	0.923	-0.116	insig
MEDP0115	1,4-Dihydro-1-Methyl-4-Oxo-3-Pyridinecarboxamide	Heterocyclic compounds	Pteridines and derivatives	C7H8N2O2	1	769-49-3	1160000	1430000	1280000	1330000	1070000	1470000	1330000	1180000	1510000	1250000	1550000	560000	0.261	0.71	1.05	0.0707	insig
MEDN0210*027	1,5-Anhydro-D-Glucitol	Carbohydrates and Its metabolites	Sugar alcohols	C6H12O5	2	154-58-5	5090	23500	13900	11700	17400	6580	41000	25600	24500	25400	13400	6440	0.922	0.122	0.574	-0.801	insig
MEDP0126	1,5-Diaminopentane	Alcohol and amines	Polyamines	C5H14N2	2	462-94-2	47300	73300	57000	56900	44100	60100	52200	42800	28500	37800	46400	60800	1.02	0.0902	1.26	0.335	insig
MEDP2132*108	1-Aminocyclobutanecarboxylic acid	Amino acid and Its metabolites	Amino acid derivatives	C5H9NO2	1	22264-50-2	11400000	14300000	14200000	14300000	16300000	14200000	11800000	14800000	14000000	13600000	15000000	13700000	0.239	0.686	1.02	0.0341	insig
MEDP1168	1-Aminocyclopropane-1-carboxylic acid	Organic acid and Its derivatives	Organic acid and Its derivatives	C4H7NO2	2	22059-21-8	64400	25100	74200	76900	59200	74200	46400	46700	48500	70200	50300	71500	0.322	0.488	1.12	0.166	insig
MEDP0831*101	1-Aminopropan-2-ol	Alcohol and amines	Alcohols	C3H9NO	2	78-96-6	44100	25600	21200	20100	13700	16900	71300	13400	24900	37300	11100	12100	0.0906	0.663	0.832	-0.266	insig
MEDP1247	1-Deoxyvaleric acid	Organic acid and Its derivatives	Organic acid and Its derivatives	C15H22O2	1	-	219000	176000	206000	202000	214000	186000	322000	290000	309000	259000	233000	224000	1.58	0.00548	0.735	-0.443	down
MEDP2725	1-Fluorocyclohexadiene-cis,cis-1,2-diol	Alcohol and amines	Alcohols	C6H7FO2	2	-	6090000	5860000	6790000	8180000	6620000	6630000	6430000	8870000	8310000	8410000	8180000	6920000	1.11	0.0473	0.852	-0.23	down
MEDP1003*113	1-Hydroxylamino-2-phenylethane	Benzene and substituted derivatives	Benzene and substituted derivatives	C8H11NO	1	3217-93-4	27000000	26500000	26500000	29900000	30200000	28200000	29100000	37900000	35600000	35000000	34400000	35200000	1.57	0.00155	0.813	-0.299	down
MEDP1475	1-Methyl-hydantoin	Heterocyclic compounds	Heterocyclic compounds	C4H6N2O2	1	616-04-6	51100	100000	32500	35100	24400	54100	26700	60400	49000	45200	32400	83100	0.0919	0.994	1	0.00309	insig
MEDN0137	1-Methyladenine	Nucleotide and Its metabolites	Nucleotide and Its metabolites	C6H7N5	2	5142-22-3	10200	16900	11200	8990	11400	15500	17500	11400	19600	14500	19600	5650	0.412	0.389	0.841	-0.25	insig
MEDP1654*155	1-Methyladenosine	Nucleotide and Its metabolites	Nucleotide and Its metabolites	C11H15N5O4	1	15763-06-1	935000	827000	966000	659000	798000	772000	670000	628000	757000	1300000	1070000	548000	0.109	0.982	0.996	-0.00531	insig
MEDN0540	1-Methylguanine	Nucleotide and Its metabolites	Nucleotide and Its metabolites	C6H7N5O	1	938-85-2	47900	81300	64600	64300	66200	68400	69400	67900	74800	76500	69500	74400	0.834	0.198	0.908	-0.14	insig
MEDP2421*159	1-Methylguanosine	Nucleotide and Its metabolites	Nucleotide and Its metabolites	C11H15N5O5	1	2140-65-0	2630000	3110000	2430000	3950000	2400000	2560000	2630000	2490000	2970000	3440000	3690000	2700000	0.318	0.669	0.954	-0.0684	insig
MEDP0147	1-Methylhistidine	Amino acid and Its metabolites	Amino acid derivatives	C7H11N3O2	1	332-80-9	120000	65800	102000	114000	165000	127000	132000	53700	100000	132000	41300	56800	0.822	0.195	1.35	0.428	insig
MEDP1713	1-Methylinosine	Nucleotide and Its metabolites	Nucleotide and Its metabolites	C11H14N4O5	1	2140-73-0	48400	50200	55300	34400	49600	41900	43500	52100	62800	57200	52800	55400	0.973	0.0975	0.865	-0.21	insig
MEDP1974*117	1-Methylpiperidine-2-carboxylic acid	Amino acid and Its metabolites	Amino acid derivatives	C7H13NO2	2	7730-87-2	180000	292000	197000	181000	257000	195000	101000	123000	89800	61500	138000	123000	1.63	0.000933	2.05	1.04	up
MEDN0698*017	1-Naphthol	Benzene and substituted derivatives	Phenolics	C10H8O	2	90-15-3	41900	30600	33700	38600	41600	29100	52500	46200	44400	36100	26700	39600	0.619	0.275	0.877	-0.189	insig
MEDP0798	1-Naphthylamine	Benzene and substituted derivatives	Benzene and substituted derivatives	C10H9N	1	134-32-7	134000	124000	142000	153000	139000	119000	149000	142000	129000	142000	145000	132000	0.476	0.465	0.968	-0.0475	insig
MEDN2231	1-O-Hexadecyl-2-O-ethyl-sn-glycero-3-phosphocholine	Others	Others	C26H56NO6P	2	-	228000	146000	159000	124000	161000	160000	234000	379000	290000	248000	302000	219000	1.61	0.00307	0.585	-0.774	down
MEDN1231	1-O-vanillyl-β-D-glucose	Benzene and substituted derivatives	Benzene and substituted derivatives	C14H18O9	2	-	25800	26400	25600	28900	26900	32700	31200	33200	32000	30400	23900	24100	0.414	0.497	0.951	-0.0724	insig
MEDP1127	1-acetylindole	Heterocyclic compounds	Indole and Its derivatives	C10H9NO	1	576-15-8	527000	647000	588000	676000	606000	587000	727000	889000	865000	732000	834000	731000	1.67	0.000623	0.76	-0.396	down
MEDN2310	1-arachidonoyl-2-hydroxy-sn-glycero-3-phosphate	GP	LPA	C23H39O7P	2	-	317000	474000	115000	347000	329000	124000	361000	298000	58400	276000	82900	266000	0.449	0.444	1.27	0.346	insig
MEDP2754	1-desoxymethylsphinganine	SL	SM	C17H37NO	2	1219484-98-6	1110000	171000	973000	1130000	974000	959000	157000	360000	324000	1150000	1070000	1150000	0.536	0.459	1.26	0.339	insig
MEDP1138	1-methylhistamine	Alcohol and amines	Polyamines	C6H13Cl2N3	1	6481-48-7	65900	53100	59200	52900	52400	81300	77100	58800	84300	89500	64100	56300	0.85	0.169	0.848	-0.238	insig
MEDN1034	1-methylnicotinamide chloride	Heterocyclic compounds	Heterocyclic compounds	C7H9ClN2O	1	1005-24-9	8520	9230	18600	13100	8450	9470	10700	10100	6680	5490	16000	11500	0.404	0.615	1.11	0.157	insig
MEDN1247	1-pyrroline-4-hydroxy-2-carboxylate	Heterocyclic compounds	Heterocyclic compounds	C5H7NO3	1	9054-77-7	76300	126000	86900	85300	86800	83500	77800	95600	122000	91000	100000	125000	0.664	0.306	0.89	-0.168	insig
MEDP0443*167	10-Formyl-Thf	Heterocyclic compounds	Pteridines and derivatives	C20H23N7O7	2	2800-34-2	76400	84000	129000	126000	147000	121000	78100	89800	136000	107000	207000	134000	0.18	0.61	0.907	-0.141	insig
MEDN1441	10-HDoHE	FA	Oxidized lipids	C22H32O3	1	90780-50-0	12100	9830	6990	7860	8430	11600	14400	25800	16100	13600	18800	7820	1.28	0.0422	0.589	-0.765	down
MEDN2207	10-Hydroxystearic Acid	FA	Oxidized lipids	C18H36O3	2	638-26-6	357000	335000	413000	490000	1640000	456000	612000	868000	652000	423000	589000	375000	0.219	0.897	1.05	0.0707	insig
MEDP1273	10-deoxyformamycin	Others	Others	C25H43NO6	1	11091-33-1	10500000	6210000	6620000	6730000	6390000	6180000	6610000	12500000	7990000	12500000	9720000	6290000	0.919	0.142	0.767	-0.382	insig
MEDN0765	11,12-EET	FA	Oxidized lipids	C20H32O3	2	123931-40-8	74900	66400	59600	71800	64700	60400	154000	200000	144000	139000	120000	116000	1.83	0.00111	0.455	-1.13	down
MEDN1409	12-Hydroxyoctadecanoic acid	FA	FFA	C18H36O3	2	106-14-9	242000	201000	256000	318000	872000	318000	414000	582000	498000	297000	395000	290000	0.527	0.703	0.892	-0.166	insig
MEDN1035	13(R)-HODE	FA	Oxidized lipids	C18H32O3	1	10219-69-9	50700	47800	54700	54400	58300	47000	87500	93800	105000	78400	85300	66000	1.77	0.000993	0.606	-0.722	down
MEDN1440	13-HDoHE	FA	Oxidized lipids	C22H32O3	2	90780-53-3	6060	7810	5850	4870	5200	6430	18200	12900	13600	13300	13000	11600	1.84	0.000124	0.439	-1.19	down
MEDN0769	14(S)-HDHA	FA	Oxidized lipids	C22H32O3	2	119433-37-3	12300	13400	12000	9800	11000	13400	25100	31000	26300	25600	24000	18000	1.83	0.000317	0.478	-1.06	down
MEDN1423	15(S)-HETrE	FA	Oxidized lipids	C20H34O3	1	92693-02-2	18000	13600	16400	15800	12200	12000	42300	40200	38600	35300	28400	24400	1.81	0.0005	0.42	-1.25	down
MEDN2300	15-Methyl prostaglandin F2alpha	FA	Oxidized lipids	C21H36O5	2	35700-23-3	27100	56900	42000	54900	40000	22200	110000	99800	17200	53700	59800	66100	0.761	0.111	0.598	-0.742	insig
MEDN1444	16-HDoHE	FA	Oxidized lipids	C22H32O3	2	90780-51-1	4840	6730	7880	2820	3220	6510	11200	5910	5310	8790	12300	5000	0.982	0.109	0.66	-0.6	insig
MEDN0856*021	2',4'-Dihydroxyacetophenone	Benzene and substituted derivatives	Benzene and substituted derivatives	C8H8O3	2	89-84-9	31000	25200	17500	29900	27700	20500	18800	38100	29500	30200	27200	27000	0.528	0.367	0.889	-0.17	insig
MEDN1677*057	2'-Aenylic Acid	Nucleotide and Its metabolites	Nucleotide and Its metabolites	C10H14N5O7P	2	130-49-4	10300	17200	11200	16500	38300	10900	28500	36900	18000	20900	10000	16700	0.591	0.464	0.796	-0.328	insig
MEDP2418	2'-Deoxyadenosine	Nucleotide and Its metabolites	Nucleotide and Its metabolites	C10H13N5O3	1	958-09-8	583000	540000	564000	362000	649000	258000	389000	283000	310000	378000	442000	303000	0.937	0.0712	1.4	0.489	insig
MEDP0149	2'-Deoxyadenosine-5'-Monophosphate	Nucleotide and Its metabolites	Nucleotide and Its metabolites	C10H14N5O6P	2	653-63-4	63400	59400	68500	83200	17200	50700	78200	97600	71000	99400	97600	97700	1.14	0.0133	0.632	-0.662	down
MEDP0396	2'-Deoxycytidine-5'-Monophosphate	Nucleotide and Its metabolites	Nucleotide and Its metabolites	C9H14N3O7P	2	1032-65-1	6430	18400	6430	10700	17300	17000	14300	14100	7080	14900	10000	3330	0.33	0.495	1.2	0.261	insig
MEDP0150	2'-Deoxyinosine	Nucleotide and Its metabolites	Nucleotide and Its metabolites	C10H12N4O4	1	890-38-0	465000	376000	560000	493000	588000	387000	618000	495000	246000	517000	628000	499000	0.028	0.743	0.955	-0.0665	insig
MEDN0141	2'-Deoxyuridine	Nucleotide and Its metabolites	Nucleotide and Its metabolites	C9H12N2O5	2	951-78-0	55700	57800	51200	39400	141000	29500	40400	17300	33700	57400	63400	29700	0.741	0.255	1.55	0.632	insig
MEDP0598	2'-Hydroxy-5'-methylacetophenone	Benzene and substituted derivatives	Benzene and substituted derivatives	C9H10O2	2	1450-72-2	755000	761000	855000	872000	2230000	1060000	1270000	2490000	1420000	828000	1370000	831000	0.595	0.431	0.796	-0.329	insig
MEDP1719	2'-O-Methylguanosine	Nucleotide and Its metabolites	Nucleotide and Its metabolites	C11H15N5O5	1	2140-71-8	366000	401000	333000	279000	339000	369000	408000	289000	420000	467000	495000	330000	0.792	0.181	0.866	-0.207	insig
MEDP1717	2'-O-methylcytidine	Nucleotide and Its metabolites	Nucleotide and Its metabolites	C10H15N3O5	2	70475-20-6	449000	431000	413000	480000	344000	598000	507000	420000	684000	549000	627000	478000	0.932	0.113	0.831	-0.267	insig
MEDN1501	2'-O-methyluridine	Nucleotide and Its metabolites	Nucleotide and Its metabolites	C10H14N2O6	2	2140-76-3	151000	226000	147000	128000	111000	161000	181000	124000	171000	161000	212000	154000	0.498	0.53	0.922	-0.117	insig
MEDP2164	2,2-Dihydroxymethyl-1-azabicyclo[2.2.2]octan-3-one	Heterocyclic compounds	Heterocyclic compounds	C9H15NO3	2	5608-24-2	0	0	0	0	0	0	56900	31400	28900	32700	47900	16000	1.91	0.00186	0		down
MEDN1753*009	2,2-Dimethylpentanoic acid	Organic acid and Its derivatives	Organic acid and Its derivatives	C7H14O2	2	1185-39-3	41600	18900	39600	38600	45400	31700	50500	23500	27500	45700	39000	27600	0.0716	0.956	1.01	0.0135	insig
MEDP2722	2,22-Dideoxy-3-dehydroecdysone	Hormones and hormone related compounds	Hormones and hormone related compounds	C27H42O4	2	-	109000	134000	128000	73400	98700	71800	106000	224000	240000	184000	203000	197000	1.52	0.00356	0.532	-0.91	down
MEDN0747*042	2,4-Di-tert-butylphenol	Benzene and substituted derivatives	Phenolics	C14H22O	2	96-76-4	173000	316000	328000	369000	234000	265000	222000	397000	450000	335000	315000	325000	0.766	0.193	0.824	-0.28	insig
MEDP0883	2,4-Dihydroxypteridine	Heterocyclic compounds	Pteridines and derivatives	C6H4N4O2	2	487-21-8	91900	62400	69600	107000	93900	62700	107000	89400	124000	94400	64100	111000	0.78	0.169	0.828	-0.273	insig
MEDP1999	2,4-Dihydroxypyridine	Heterocyclic compounds	Pteridines and derivatives	C5H5NO2	1	626-03-9	101000	117000	90600	66900	110000	64200	98700	71500	119000	112000	81700	119000	0.477	0.485	0.912	-0.133	insig
MEDP1246	2,4-diacetamino-2,4,6-triphenoxy-D-mannopyranose	Carbohydrates and Its metabolites	Sugar derivatives	C10H18N2O5	1	-	601000	783000	692000	994000	1200000	1240000	954000	1410000	1720000	1220000	913000	1360000	1.04	0.0627	0.726	-0.461	insig
MEDP1814	2,5-Dimethyl-2,3-dihydrofuran-3-one	Heterocyclic compounds	Heterocyclic compounds	C6H8O2	2	14400-67-0	459000	433000	476000	502000	501000	509000	452000	407000	412000	367000	437000	418000	1.5	0.00358	1.16	0.208	up
MEDN0689	2,5-Furandicarboxylicacid	Organic acid and Its derivatives	Organic acid and Its derivatives	C6H4O5	2	3238-40-2	507000	585000	530000	463000	599000	459000	668000	644000	582000	554000	590000	634000	1.34	0.0159	0.855	-0.225	down
MEDP0785	2,6,6-Trimethyl-2-cyclohexene-1,4-dione	Aldehyde,Ketones,Esters	Ketones	C9H12O2	2	1125-21-9	40600	45000	25600	10700	76000	24800	28400	27800	40800	35300	21000	30200	0.0473	0.525	1.21	0.279	insig
MEDN1837	2,6-Di-tert-butyl-4-(hydroxymethyl)phenol	Benzene and substituted derivatives	Benzene and substituted derivatives	C15H24O2	1	88-26-6	88800	102000	94900	110000	93400	112000	135000	96500	110000	108000	87800	107000	0.535	0.368	0.933	-0.1	insig
MEDP1735	2,6-Diamino-5-hydroxyhexanoic acid	Amino acid and Its metabolites	Amino acid derivatives	C6H14N2O3	2	13204-98-3	69100	54800	54100	53500	90300	61100	31200	79600	63600	37100	49100	49700	0.819	0.222	1.23	0.304	insig
MEDP0606	2-(3,4-dimethoxyphenyl)ethanamine	Benzene and substituted derivatives	Benzene and substituted derivatives	C10H15NO2	2	120-20-7	23600	11800	37200	25900	38800	29600	34100	18200	24600	30600	23400	11600	0.368	0.456	1.17	0.228	insig
MEDP2553	2-(Acetylamino)-2-deoxy-A-D-glucopyranose	Alcohol and amines	Amines	C8H15NO6	2	10036-64-3	28900	29300	24200	44800	47000	29900	50500	11200	37400	4530	20300	13100	0.916	0.209	1.49	0.576	insig
MEDN0431	2-(Dimethylamino)Guanosine	Nucleotide and Its metabolites	Nucleotide and Its metabolites	C12H17N5O5	1	2140-67-2	116000	197000	181000	171000	143000	185000	272000	212000	312000	322000	310000	257000	1.64	0.000414	0.59	-0.76	down
MEDN1241	2-(α-D-mannosyl)-3-phosphate glyceride	Alcohol and amines	Amines	C9H17O12P	2	-	426000	261000	251000	259000	239000	238000	264000	485000	387000	391000	520000	542000	1.31	0.0166	0.646	-0.63	down
MEDP2027*126	2-Amino-2-deoxymannose	Alcohol and amines	Amines	C6H13NO5	2	2636-92-2	30200	36000	33900	38900	28100	28000	28500	23900	18600	10500	41800	28000	0.91	0.165	1.29	0.367	insig
MEDP2525	2-Amino-2-methyl-1,3-propanediol	Alcohol and amines	Alcohols	C4H11NO2	2	115-69-5	14400	55400	44300	72900	58600	54600	30500	29800	73900	25400	49600	74500	0.13	0.827	1.06	0.0812	insig
MEDN2155	2-Amino-5-nitrobenzoic acid	Benzene and substituted derivatives	Benzene and substituted derivatives	C7H6N2O4	2	616-79-5	94900	96000	60100	111000	49400	113000	87200	74200	77600	97700	66700	91300	0.107	0.685	1.06	0.0854	insig
MEDP2590	2-Aminoadenosine	Nucleotide and Its metabolites	Nucleotide and Its metabolites	C10H14N6O4	2	71900	143000	224000	312000	194000	134000	177000	111000	167000	302000	219000	254000	212000	0.204	0.728	0.935	-0.0964	insig
MEDN0279	2-Aminoethanesulfinic Acid	Organic acid and Its derivatives	Sulfonic acids	C2H7NO2S	1	300-84-5	42400	36000	45700	32400	38300	29200	23200	78900	52200	27500	50200	46000	0.447	0.334	0.806	-0.311	insig
MEDP1100	2-Aminomethylpyrimidine	Nucleotide and Its metabolites	Nucleotide and Its metabolites	C5H7N3	1	372118-67-7	79600	673000	620000	662000	717000	536000	543000	901000	785000	768000	644000	638000	0.707	0.174	0.768	-0.38	insig
MEDP0734*107	2-Aminophenol	Benzene and substituted derivatives	Phenolics	C6H7NO	2	95-55-6	116000	42300	47500	20100	42100	58800	67500	99000	37700	56700	58500	57800	0.53	0.611	0.868	-0.205	insig
MEDP1956	2-Aminopurine	Nucleotide and Its metabolites	Nucleotide and Its metabolites	C5H5N5	2	452-06-2	1590000	1170000	1930000	1630000	1770000	1020000	989000	1560000	922000	1010000	916000	913000	1.24	0.0266	1.44	0.53	up
MEDN0502	2-Deoxyribose 1-Phosphate	Carbohydrates and Its metabolites	Phosphate sugars	C5H11O7P	2	17210-42-3	761000	871000	908000	889000	1010000	771000	1060000	783000	928000	829000	978000	757000	0.226	0.747	0.977	-0.0336	insig
MEDN1675	2-Deoxyribose 5'-phosphate	Nucleotide and Its metabolites	Nucleotide and Its metabolites	C5H11O7P	2	102916-66-5	276000	246000	338000	309000	321000	319000	291000	261000	263000	260000	305000	118000	0.766	0.133	1.21	0.272	insig
MEDP2738	2-Hexadecanoylthio-1-ethylphosphorylcholine	FA	Others	C23H48NO5PS	2	60793-01-3	2110000	1490000	1590000	1280000	1270000	1240000	1360000	1680000	1710000	1940000	1330000	1220000	0.256	0.813	0.972	-0.0408	insig
MEDP1897	2-Hydroxy-2-methylbutanenitrile	Others	Others	C5H9NO	2	808000	209000	172000	207000	228000	110000	212000	289000	218000	154000	238000	285000	294000	0.885	0.0764	0.771	-0.375	insig
MEDP0151*121	2-Hydroxy-6-Aminopurine	Nucleotide and Its metabolites	Nucleotide and Its metabolites	C5H5N5O	2	3373-53-3	9810000	12000000	9390000	10100000	10700000	11200000	9840000	7230000	8240000	9910000	9940000	8430000	1.21	0.0255	1.18	0.238	up
MEDN1554	2-Hydroxyethanesulfonate	Organic acid and Its derivatives	Sulfonic acids	C2H6O4S	1	1562-00-1	220000	284000	447000	295000	284000	334000	170000	340000	271000	324000	300000	621000	0.0215	0.707	0.92	-0.12	insig
MEDN1052*019	2-Hydroxyglutaric acid	Organic acid and Its derivatives	Organic acid and Its derivatives	C5H8O5	2	13095-48-2	223000	495000	430000	262000	392000	327000	182000	320000	319000	305000	312000	217000	0.767	0.144	1.29	0.364	insig
MEDP1982	2-Methyl-1-Pyrroline	Heterocyclic compounds	Heterocyclic compounds	C5H9N	1	872-32-2	1030000	2260000	1130000	1330000	1250000	1250000	1560000	1610000	1360000	1230000	1370000	2040000	0.558	0.503	0.901	-0.151	insig
MEDN1057	2-Methyl-d-erythritol 2,4-cyclodiphosphate	Carbohydrates and Its metabolites	Phosphate sugars	C5H12O9P2	1	143488-44-2	1780000	1430000	1260000	1530000	1490000	1700000	738000	1730000	1870000	1620000	1760000	1570000	0.129	0.931	0.989	-0.0155	insig
MEDN1326	2-Methylglutaric Acid	Organic acid and Its derivatives	Organic acid and Its derivatives	C6H10O4	1	18069-17-5	113000	150000	166000	198000	287000	149000	176000	314000	219000	179000	198000	206000	0.771	0.265	0.823	-0.281	insig
MEDP0461*159	2-Methylguanosine	Nucleotide and Its metabolites	Nucleotide and Its metabolites	C11H15N5O5	1	2140-77-4	2630000	3110000	2430000	3950000	2400000	2560000	2630000	2490000	2970000	3440000	3690000	2700000	0.318	0.669	0.954	-0.0684	insig
MEDN1699*009	2-Methylhexanoic acid	Organic acid and Its derivatives	Organic acid and Its derivatives	C7H14O2	1	4536-23-6	41600	18900	39600	38600	45400	31700	50500	23500	27500	45700	39000	27600	0.0716	0.956	1.01	0.0135	insig
MEDN2068*004	2-Methyllactic acid	Organic acid and Its derivatives	Organic acid and Its derivatives	C4H8O3	2	594-61-6	171000	236000	217000	223000	201000	330000	333000	243000	276000	246000	257000	293000	0.96	0.121	0.836	-0.259	insig
MEDN0285*012	2-Methylsuccinic Acid	Organic acid and Its derivatives	Organic acid and Its derivatives	C5H8O4	2	498-21-5	154000	142000	104000	187000	180000	170000	316000	177000	157000	297000	116000	154000	0.664	0.244	0.771	-0.374	insig
MEDN1770	2-Naphthalenesulfonic acid	Benzene and substituted derivatives	Benzene and substituted derivatives	C10H8O3S	1	120-18-3	484000	473000	338000	361000	319000	305000	476000	1150000	457000	381000	395000	387000	0.863	0.255	0.703	-0.508	insig
MEDN1750	2-Naphthoic acid	Organic acid and Its derivatives	Organic acid and Its derivatives	C11H8O2	2	34200	1390000	1400000	1370000	1510000	1500000	1260000	1540000	1190000	1540000	1240000	1510000	1430000	0.0172	0.974	0.998	-0.00258	insig
MEDN0683*017	2-Naphthol	Benzene and substituted derivatives	Phenolics	C10H8O	2	135-19-3	41900	30600	33700	38600	41600	29100	52500	46200	44400	36100	26700	39600	0.619	0.275	0.877	-0.189	insig
MEDP1718	2-O-Methylcytosine	Heterocyclic compounds	Heterocyclic compounds	C5H7N3O	1	3289-47-2	78200	62900	192000	137000	80200	77300	54000	114000	78400	88500	64800	136000	0.386	0.543	1.17	0.227	insig
MEDN2150	2-O-α-D-glucopyranosyl-L-ascorbic acid	Carbohydrates and Its metabolites	Sugar derivatives	C12H18O11	2	129499-78-1	39300	19100	37000	43000	17500	43700	23200	41500	42700	38200	24400	15000	0.171	0.727	1.08	0.109	insig
MEDP0789	2-Pentyl-3-phenyl-2-propenal	Aldehyde,Ketones,Esters	Aldehydes	C14H18O	2	122-40-7	22500	13100	19300	23200	16600	3470	26500	15800	25500	17600	23800	16300	0.737	0.239	0.782	-0.354	insig
MEDP1720	2-Phenylglycine	Amino acid and Its metabolites	Amino acid derivatives	C8H9NO2	1	342000	256000	193000	231000	216000	126000	224000	225000	112000	196000	231000	240000	249000	0.0476	0.964	0.994	-0.00896	insig
MEDN2351	2-Phospho-D-glyceric acid	Organic acid and Its derivatives	Phosphoric acids	C3H7O7P	1	3443-57-0	1170000	988000	1440000	1060000	1120000	749000	762000	696000	451000	1180000	1020000	939000	0.94	0.111	1.29	0.37	insig
MEDN0098	2-Picolinic Acid	Heterocyclic compounds	Pteridines and derivatives	C6H5NO2	1	98-98-6	2120000	1730000	2080000	3030000	1830000	1970000	3320000	2990000	3500000	3030000	3030000	3330000	1.6	0.00136	0.665	-0.59	down
MEDP2360	2-Pyrrolidineacetic acid	Amino acid and Its metabolites	Amino acid derivatives	C6H11NO2	2	56879-46-0	107000	144000	70100	152000	222000	186000	213000	184000	201000	130000	218000	174000	0.833	0.16	0.787	-0.346	insig
MEDP2697	2-Thio-PAF	FA	Others	C26H54NO6PS	2	-	6610000	4820000	5420000	5940000	5460000	5420000	8730000	9370000	8680000	8990000	8050000	7270000	1.78	2.94e-05	0.659	-0.602	down
MEDN1226*010	2-amino-4-oxovaleric acid	Organic acid and Its derivatives	Organic acid and Its derivatives	C5H9NO3	2	4439-83-2	981000	1100000	1150000	564000	1320000	1170000	471000	607000	567000	545000	570000	406000	1.58	0.00366	1.99	0.991	up
MEDP2454	2-amino-6-methylmercaptopurine	Nucleotide and Its metabolites	Nucleotide and Its metabolites	C6H7N5S	2	1198-47-6	18600	29000	21800	37100	30400	24700	20500	36600	34400	28400	21700	17700	0.0455	0.93	1.01	0.0204	insig
MEDN1958	2-methyl citric acid	Organic acid and Its derivatives	Organic acid and Its derivatives	C7H10O7	1	6061-96-7	22000	24000	20600	31100	18100	27800	13100	26200	13900	23400	20100	21100	0.872	0.168	1.22	0.285	insig
MEDP1272	20,26-dihydroxyecdysone	Hormones and hormone related compounds	Hormones and hormone related compounds	C27H44O8	2	19458-46-9	12400000	8240000	9500000	9150000	9300000	9530000	11900000	18400000	13700000	16700000	13200000	10400000	1.46	0.0137	0.689	-0.537	down
MEDN1445	20-HDoHE	FA	Oxidized lipids	C22H32O3	2	90906-41-5	5150	11000	8190	5880	7080	9020	14900	19200	18400	15800	9180	11200	1.55	0.00523	0.522	-0.938	down
MEDN1817	20-Hydroxy Prostaglandin F2α	FA	Oxidized lipids	C20H34O6	2	57930-92-4	126000	97300	127000	320000	141000	232000	281000	303000	196000	159000	168000	239000	0.755	0.264	0.775	-0.368	insig
MEDN0143*057	3'-Adenylic acid	Nucleotide and Its metabolites	Nucleotide and Its metabolites	C10H14N5O7P	1	84-21-9	10300	17200	11200	16500	38300	10900	28500	36900	18000	20900	10000	16700	0.591	0.464	0.796	-0.328	insig
MEDP2728	3,4-Dichloroaniline	Benzene and substituted derivatives	Benzene and substituted derivatives	C6H5Cl2N	2	95-76-1	196000	134000	220000	155000	198000	198000	162000	184000	162000	179000	169000	158000	0.534	0.339	1.09	0.118	insig
MEDN1747	3,4-Dimethylbenzoic acid	Benzene and substituted derivatives	Benzene and substituted derivatives	C9H10O2	2	619-04-5	262000	256000	281000	319000	743000	380000	409000	815000	528000	299000	551000	255000	0.606	0.384	0.784	-0.351	insig
MEDP2105	3,6,9,12,15,18,21-Heptaoxatricosane-21,23-diol	Benzene and substituted derivatives	Benzene and substituted derivatives	C16H34O9	1	5117-19-1	143000	162000	174000	116000	138000	240000	152000	98700	171000	157000	150000	96600	0.616	0.288	1.18	0.237	insig
MEDN1706	3-(2-Hydroxyphenyl)propanoic acid	Benzene and substituted derivatives	Phenolic acids	C9H10O3	1	495-78-3	66300000	58100000	59400000	68100000	67700000	60600000	66600000	61900000	65800000	57600000	62300000	62400000	0.169	0.792	1.01	0.014	insig
MEDN0080	3-(4-hydroxyphenyl)acrylaldehyde	Benzene and substituted derivatives	Benzene and substituted derivatives	C9H8O2	2	2538-87-6	563000	586000	516000	585000	580000	538000	690000	650000	588000	550000	632000	582000	1.14	0.0559	0.912	-0.132	insig
MEDP2361	3-(imidazol-4-yl)propionic acid	Heterocyclic compounds	Heterocyclic compounds	C6H8N2O2	1	1074-59-5	816000	490000	765000	660000	591000	650000	854000	609000	734000	736000	802000	666000	0.676	0.263	0.902	-0.148	insig
MEDN1246	3-(pyrazol-1-yl)-L-alanine	Amino acid and Its metabolites	Amino acid derivatives	C6H9N3O2	2	2734-48-7	143000	197000	266000	192000	208000	165000	225000	314000	266000	285000	329000	264000	1.46	0.004	0.694	-0.526	down
MEDP1723	3-Amino-2-piperidinone	Heterocyclic compounds	Heterocyclic compounds	C5H10N2O	2	1892-22-4	13600	22000	38700	42100	22600	15500	85500	48200	73700	59800	40100	88200	1.54	0.0026	0.391	-1.36	down
MEDP1724	3-Amino-4-methylpentanoic acid	Organic acid and Its derivatives	Organic acid and Its derivatives	C6H13NO2	1	5699-54-7	357000	507000	431000	600000	590000	752000	810000	298000	498000	411000	511000	678000	0.166	0.958	1.01	0.0138	insig
MEDP2182	3-Aminopropionitrile	Alcohol and amines	Amines	C3H6N2	2	151-18-8	48600	45000	49500	50600	55400	57200	45400	49000	41100	48700	71000	34600	0.442	0.624	1.06	0.0802	insig
MEDP2104	3-Aminoquinoline	Benzene and substituted derivatives	Benzene and substituted derivatives	C9H8N2	2	580-17-6	1050000	1230000	1320000	1430000	1340000	1380000	1570000	1990000	2010000	1930000	1680000	1600000	1.64	0.000674	0.719	-0.476	down
MEDP1132	3-Carboxypropyltrimethylammonium	Organic acid and Its derivatives	Organic acid and Its derivatives	C7H15NO2	1	6249-56-5	103000	99700	129000	135000	112000	89900	137000	169000	149000	157000	206000	150000	1.54	0.00267	0.691	-0.532	down
MEDP0669	3-Chloroaniline	Benzene and substituted derivatives	Benzene and substituted derivatives	C6H6ClN	1	108-42-9	47300000	40800000	45700000	49000000	50200000	43700000	46100000	47200000	48400000	41900000	44200000	47400000	0.11	0.886	1.01	0.00797	insig
MEDN1602*051	3-Deoxyguanosine	Nucleotide and Its metabolites	Nucleotide and Its metabolites	C10H13N5O4	2	3608-58-0	310000	648000	430000	313000	1020000	241000	602000	352000	458000	866000	866000	341000	0.516	0.582	0.848	-0.237	insig
MEDP2347	3-Guanidinopropionic acid	Organic acid and Its derivatives	Organic acid and Its derivatives	C4H9N3O2	1	353-09-3	1060000	1250000	1460000	1370000	1440000	1350000	1880000	1930000	1620000	1610000	1400000	1590000	1.41	0.00684	0.791	-0.338	down
MEDN0290	3-Hydroxy-3-Methyl Butyric Acid	Organic acid and Its derivatives	Organic acid and Its derivatives	C5H10O3	1	625-08-1	308000	342000	273000	1030000	342000	295000	293000	354000	412000	320000	391000	321000	0.281	0.524	1.24	0.307	insig
MEDN0025	3-Hydroxy-3-Methylpentane-1,5-Dioic Acid	Amino acid and Its metabolites	Amino acid derivatives	C6H10O5	2	503-49-1	101000	110000	128000	125000	155000	128000	105000	188000	141000	143000	118000	109000	0.346	0.552	0.932	-0.102	insig
MEDP2538*130	3-Hydroxy-L-phenylalanine	Amino acid and Its metabolites	Amino acid derivatives	C9H11NO3	1	587-33-7	39900000	49600000	56700000	57200000	54800000	55300000	54400000	64900000	69900000	60900000	68400000	73500000	1.31	0.00724	0.8	-0.323	down
MEDN1504	3-Hydroxycinnamic acid	Organic acid and Its derivatives	Organic acid and Its derivatives	C9H8O3	2	14755-02-3	42600	19900	35700	36400	44400	14500	50100	48100	37100	64000	37500	38700	1.04	0.0654	0.702	-0.51	insig
MEDN0820*019	3-Hydroxyglutaric acid	Organic acid and Its derivatives	Organic acid and Its derivatives	C5H8O5	2	638-18-6	223000	495000	430000	262000	392000	327000	182000	320000	319000	305000	312000	217000	0.767	0.144	1.29	0.364	insig
MEDP0446	3-Hydroxykynurenine	Amino acid and Its metabolites	Amino acid derivatives	C10H12N2O4	2	2147-61-7	114000	59200	72900	62700	83300	101000	115000	85700	88300	46000	94800	101000	0.188	0.644	0.93	-0.105	insig
MEDP1898	3-Hydroxyphenylurea	Benzene and substituted derivatives	Benzene and substituted derivatives	C7H8N2O2	1	701-82-6	52900000	49200000	51800000	54900000	55200000	47000000	58300000	45600000	50400000	48700000	51800000	52100000	0.222	0.759	1.01	0.0193	insig
MEDP0509	3-Indoleacrylic acid	Organic acid and Its derivatives	Organic acid and Its derivatives	C11H9NO2	1	1204-06-4	132000	92300	68400	102000	114000	101000	58500	108000	91800	125000	79300	108000	0.344	0.636	1.07	0.0936	insig
MEDP0270	3-Indolebutyric Acid	Heterocyclic compounds	Indole and Its derivatives	C12H13NO2	1	133-32-4	2030000	2030000	2100000	2520000	2390000	2210000	2520000	2300000	2330000	2160000	2180000	2050000	0.272	0.689	0.98	-0.0286	insig
MEDP1649	3-Methoxy-L-Tyrosine	Amino acid and Its metabolites	Amino acid derivatives	C10H15NO5	2	200630-46-2	15800	8520	12400	9810	22100	2590	0	0	0	0	0	0	1.81	0.00724	#DIV/0!		up
MEDP1495	3-Methoxyphenylacetic acid	Organic acid and Its derivatives	Organic acid and Its derivatives	C9H10O3	2	1798-09-0	1920000	1700000	1900000	2090000	2150000	1860000	1910000	1790000	2050000	1790000	1840000	1910000	0.442	0.495	1.03	0.0423	insig
MEDN1506	3-Methyluridine	Nucleotide and Its metabolites	Nucleotide and Its metabolites	C10H14N2O6	2	2140-69-4	151000	176000	187000	215000	170000	202000	205000	213000	241000	208000	205000	210000	1.24	0.0244	0.859	-0.22	down
MEDN2272	3-Oxostearic acid	Organic acid and Its derivatives	Organic acid and Its derivatives	C18H34O3	2	16694-29-4	140000	89300	94400	167000	353000	199000	173000	444000	281000	113000	195000	101000	0.404	0.52	0.798	-0.325	insig
MEDN0841*068	3-Ureidopropionate	Organic acid and Its derivatives	Organic acid and Its derivatives	C4H8N2O3	2	462-88-4	13600	11000	7740	13400	13800	7740	17800	33100	27700	19600	21900	25800	1.66	0.00123	0.461	-1.12	down
MEDP2408	3-aminobenzamide	Benzene and substituted derivatives	Benzene and substituted derivatives	C7H8N2O	2	3544-24-9	15000000	14600000	14800000	17300000	18400000	15300000	17000000	20800000	22200000	9710000	19400000	17800000	0.389	0.351	0.892	-0.165	insig
MEDN1771	4,4'-Dihydroxybenzophenone	Benzene and substituted derivatives	Benzene and substituted derivatives	C13H10O3	2	611-99-4	54600	47600	41100	45900	55600	44300	55600	40200	47900	40600	47800	37200	0.507	0.386	1.07	0.103	insig
MEDP2211	4-(4-Hydroxyaniline)-6,7-Dimethoxyquinazoline-JANEX-1	Benzene and substituted derivatives	Benzene and substituted derivatives	C16H15N3O3	2	202475-60-3	150000	185000	109000	152000	165000	170000	159000	188000	183000	176000	157000	197000	0.887	0.123	0.878	-0.188	insig
MEDP2647	4-(Hydroxyamino)quinoline 1-oxide	Benzene and substituted derivatives	Benzene and substituted derivatives	C9H8N2O2	2	4637-56-3	34200	31700	40200	41500	51900	27600	50700	42100	41700	35500	35900	45000	0.601	0.374	0.905	-0.143	insig
MEDP2527	4-Amino-3-hydroxybutyric acid	Others	Medicine	C4H9NO3	1	924-49-2	334000	263000	348000	305000	305000	378000	273000	442000	377000	330000	447000	413000	0.843	0.109	0.847	-0.24	insig
MEDP2364	4-Amino-5-hydroxymethyl-2-methylpyrimidine	Heterocyclic compounds	Heterocyclic compounds	C6H9N3O	2	73-67-6	481000	466000	457000	435000	332000	429000	554000	417000	405000	368000	461000	405000	0.0542	0.958	0.996	-0.00618	insig
MEDP2342	4-Aminomethylpyrimidine	Heterocyclic compounds	Heterocyclic compounds	C5H7N3	1	45588-79-2	54200	37600	37100	41800	71300	34000	42800	73900	76700	70200	95300	51500	1.17	0.0444	0.673	-0.572	down
MEDP0791*107	4-Aminophenol	Benzene and substituted derivatives	Phenolics	C6H7NO	2	123-30-8	116000	42300	47500	20100	42100	58800	67500	99000	37700	56700	58500	57800	0.53	0.611	0.868	-0.205	insig
MEDP0296	4-Guanidinobutyric Acid	Organic acid and Its derivatives	Organic acid and Its derivatives	C5H11N3O2	1	463-00-3	309000	513000	346000	552000	442000	506000	534000	892000	505000	646000	867000	848000	1.35	0.0112	0.622	-0.686	down
MEDN0128	4-Hydroxy-3-methoxybenzaldehyde	Benzene and substituted derivatives	Phenolics	C8H8O3	1	121-33-5	276000	265000	300000	303000	300000	386000	322000	306000	285000	414000	294000	255000	0.138	0.79	0.975	-0.0362	insig
MEDP2703	4-Hydroxy-4-(pyridin-2-yl)butan-2-one	Heterocyclic compounds	Pyridine and pyridine derivatives	C9H11NO2	2	6337-41-3	874000	719000	745000	1040000	942000	979000	708000	715000	859000	796000	980000	867000	0.603	0.381	1.08	0.105	insig
MEDN0410	4-Hydroxybenzaldehyde	Benzene and substituted derivatives	Benzene and substituted derivatives	C7H6O2	1	123-08-0	73300	38300	62300	70500	90100	72500	84600	83200	74600	72000	92300	61700	0.662	0.249	0.869	-0.203	insig
MEDN2196	4-Hydroxyquinoline	Benzene and substituted derivatives	Benzene and substituted derivatives	C9H7NO	2	611-36-9	68200	62800	48500	55700	67600	55500	74200	63500	80300	66500	86900	65200	1.26	0.0263	0.821	-0.285	down
MEDN1740*009	4-Methylhexanoic acid	Organic acid and Its derivatives	Organic acid and Its derivatives	C7H14O2	2	1561-11-1	41600	18900	39600	38600	45400	31700	50500	23500	27500	45700	39000	27600	0.0716	0.956	1.01	0.0135	insig
MEDN1092	4-acetoxyphenol	Benzene and substituted derivatives	Phenolics	C8H8O3	2	3233-32-7	128000	172000	184000	163000	154000	183000	118000	185000	199000	181000	170000	141000	0.0312	0.925	0.991	-0.0127	insig
MEDN0731*042	4-tert-Octylphenol	Benzene and substituted derivatives	Phenolics	C14H22O	2	140-66-9	173000	316000	328000	369000	234000	265000	222000	397000	450000	335000	315000	325000	0.766	0.193	0.824	-0.28	insig
MEDP0401	5'-Deoxy-5'-(Methylthio) Adenosine	Nucleotide and Its metabolites	Nucleotide and Its metabolites	C11H15N5O3S	1	2457-80-9	11900000	13100000	13400000	13900000	16400000	15900000	12600000	17300000	14900000	13400000	14600000	16500000	0.392	0.46	0.947	-0.0784	insig
MEDP1202	5'-Deoxy-5'-fluoroadenosine	Nucleotide and Its metabolites	Nucleotide and Its metabolites	C10H12FN5O3	2	731-98-6	525000	292000	505000	402000	500000	270000	202000	298000	225000	219000	201000	256000	1.53	0.0092	1.78	0.833	up
MEDN1022	5,6-Dimethylbenzimidazole	Heterocyclic compounds	Heterocyclic compounds	C9H10N2	2	582-60-5	221000	242000	224000	236000	273000	239000	293000	302000	322000	289000	310000	315000	1.74	5.44e-05	0.784	-0.351	down
MEDP2540	5-Acetylamino-6-amino-3-methyluracil	Nucleotide and Its metabolites	Nucleotide and Its metabolites	C7H10N4O3	2	19893-78-8	710000	574000	478000	685000	435000	407000	831000	662000	925000	527000	693000	710000	1.16	0.0455	0.756	-0.403	down
MEDN2325	5-Acetylamino-6-formylamino-3-methyluracil	Benzene and substituted derivatives	Benzene and substituted derivatives	C8H10N4O4	2	85438-96-6	9300	13800	9600	14500	14800	14000	13800	19900	8120	17400	14000	15900	0.501	0.286	0.852	-0.231	insig
MEDP1949	5-Aminoimidazole ribonucleotide	Nucleotide and Its metabolites	Nucleotide and Its metabolites	C8H14N3O7P	1	25635-88-5	87600	19100	48700	114000	114000	63200	42100	78300	75100	62100	85300	18700	0.283	0.465	1.24	0.306	insig
MEDN1513	5-Hydroxy-2'-deoxyuridine	Nucleotide and Its metabolites	Nucleotide and Its metabolites	C9H12N2O6	2	5168-36-5	2120000	2220000	1700000	1370000	1540000	1310000	1660000	1160000	1710000	2310000	2280000	1900000	0.318	0.604	0.931	-0.103	insig
MEDN2281	5-Hydroxyindolepyruvate	Heterocyclic compounds	Indole and Its derivatives	C11H9NO4	2	-	1360000	1270000	1400000	1660000	1280000	1150000	1400000	1380000	1530000	1250000	1440000	1390000	0.408	0.573	0.967	-0.0491	insig
MEDN2326	5-Hydroxyisourate	Organic acid and Its derivatives	Organic acid and Its derivatives	C5H4N4O4	2	6960-30-1	48800	82000	60800	62900	84200	78400	87400	92500	84900	60400	82900	55000	0.545	0.394	0.901	-0.15	insig
MEDP2389	5-Hydroxypyridine-2(1H)-one	Heterocyclic compounds	Pyridine and pyridine derivatives	C5H5NO2	2	59273-17-5	101000	117000	90600	66900	110000	64200	98700	71500	119000	112000	81700	119000	0.477	0.485	0.912	-0.133	insig
MEDP1476	5-Methoxytryptamine	Alcohol and amines	Amines	C11H14N2O	2	608-07-1	131000	190000	153000	195000	197000	138000	210000	207000	211000	269000	175000	242000	1.29	0.017	0.765	-0.387	down
MEDP1736	5-Methylcytidine	Nucleotide and Its metabolites	Nucleotide and Its metabolites	C10H15N3O5	1	2140-61-6	533000	257000	343000	901000	328000	277000	632000	257000	481000	335000	300000	326000	0.177	0.669	1.13	0.179	insig
MEDP0155	5-Methylcytosine	Nucleotide and Its metabolites	Nucleotide and Its metabolites	C5H7N3O	1	554-01-8	39900	59500	50500	52500	40700	81400	41600	47800	62700	43900	66500	50000	0.124	0.795	1.04	0.0546	insig
MEDP0156	5-Methyluridine	Nucleotide and Its metabolites	Nucleotide and Its metabolites	C10H14N2O6	1	1463-10-1	953000	924000	1170000	881000	1000000	1200000	1100000	1260000	1260000	1020000	1110000	1130000	0.979	0.0968	0.892	-0.165	insig
MEDN1239	5-O-(1-carboxyvinyl)-3-phosphate	Organic acid and Its derivatives	Phosphoric acids	C10H13O10P	2	89771-75-5	944000	931000	1010000	932000	973000	788000	1160000	1220000	1270000	1050000	1390000	1240000	1.66	0.000564	0.76	-0.397	down
MEDP0036	5-Oxoproline	Amino acid and Its metabolites	Amino acid derivatives	C5H7NO3	1	149-87-1	9770000	9530000	10700000	11800000	9530000	9590000	8060000	16200000	13100000	11600000	12600000	11600000	0.891	0.121	0.832	-0.265	insig
MEDN1401	5-Phenylpenta-2,4-Dienoic Acid	Organic acid and Its derivatives	Organic acid and Its derivatives	C11H10O2	2	1552-94-9	461000	382000	412000	433000	443000	331000	463000	456000	409000	413000	424000	453000	0.693	0.267	0.94	-0.0886	insig
MEDN0669	5-oxoETE	FA	FFA	C20H30O3	2	106154-18-1	9120	10200	10700	9610	4970	11500	20600	23000	22600	22300	20400	16000	1.73	1.13e-05	0.448	-1.16	down
MEDP0298*114	6-Aminocaproic Acid	Amino acid and Its metabolites	Amino acid derivatives	C6H13NO2	2	60-32-2	95200000	158000000	171000000	56200000	188000000	173000000	205000000	255000000	82500000	226000000	230000000	74200000	0.458	0.35	0.785	-0.349	insig
MEDP2303	6-Diazo-5-oxo-L-norleucine	Amino acid and Its metabolites	Amino acid derivatives	C6H9N3O3	2	157-03-9	15300	11700	17300	9700	27800	13200	14300	55400	24400	20000	25700	20400	1.04	0.141	0.594	-0.752	insig
MEDP0526	6-Dimethylaminopurine	Nucleotide and Its metabolites	Nucleotide and Its metabolites	C7H9N5	1	938-55-6	3220000	3410000	3200000	2560000	2890000	2690000	3150000	2420000	2710000	3020000	3030000	2520000	0.501	0.335	1.07	0.0925	insig
MEDP2406	6-Methylaminopurine	Nucleotide and Its metabolites	Nucleotide and Its metabolites	C6H7N5	2	443-72-1	617000	555000	566000	447000	508000	395000	337000	253000	291000	482000	390000	234000	1.39	0.00481	1.55	0.636	up
MEDP0821	6-Methylnicotinamide	Heterocyclic compounds	Pteridines and derivatives	C7H8N2O	1	6960-22-1	14100000	15100000	17800000	14300000	10200000	12900000	10600000	20100000	19100000	20400000	20500000	18400000	0.993	0.0563	0.774	-0.37	insig
MEDP2691	6-Methylthiopurine 5'-monophosphate ribonucleotide	Nucleotide and Its metabolites	Nucleotide and Its metabolites	C11H15N4O7PS	2	7021-52-5	3390000	2360000	2280000	2670000	2810000	2530000	2590000	3360000	2940000	3270000	2470000	3010000	0.712	0.246	0.908	-0.139	insig
MEDP1073*124	6-O-methylguanine	Nucleotide and Its metabolites	Nucleotide and Its metabolites	C6H7N5O	2	20535-83-5	4670000	5200000	4610000	5180000	5140000	5860000	5210000	4800000	5820000	6950000	7110000	5320000	0.914	0.122	0.871	-0.2	insig
MEDN2341	6-Phosphogluconic acid	Organic acid and Its derivatives	Phosphoric acids	C6H13O10P	2	921-62-0	7410000	8400000	9090000	6470000	9580000	8470000	5690000	7660000	11700000	7210000	7680000	11000000	0.00739	0.825	0.971	-0.0419	insig
MEDP2511	6-Thio-dG	Nucleotide and Its metabolites	Nucleotide and Its metabolites	C10H13N5O3S	2	789-61-7	75800	62200	61200	90800	79600	87700	67900	68100	105000	39100	45500	42400	0.834	0.229	1.24	0.314	insig
MEDP2368	6-aminonicotinamide	Nucleotide and Its metabolites	Nucleotide and Its metabolites	C6H7N3O	1	329-89-5	178000	104000	89700	227000	141000	213000	189000	282000	290000	252000	243000	213000	1.25	0.0137	0.648	-0.625	down
MEDN0611	6β-hydroxytestosterone	Hormones and hormone related compounds	Hormones and hormone related compounds	C19H28O3	2	62-99-7	30600	23900	24200	31000	23800	25100	38400	34700	31100	24800	32100	22700	0.827	0.173	0.863	-0.212	insig
MEDP1960	7-(alpha-D-glucosyl)-N(6)-isopentenyladenine	Nucleotide and Its metabolites	Nucleotide and Its metabolites	C16H23N5O5	1	-	38800	20900	20100	8370	16900	55000	19600	33600	16300	15400	9640	6020	0.63	0.251	1.59	0.67	insig
MEDP2796	7-Ketocholesterol	Hormones and hormone related compounds	Hormones and hormone related compounds	C27H44O2	2	566-28-9	193000	223000	176000	195000	194000	151000	367000	478000	372000	512000	294000	349000	1.79	0.00119	0.478	-1.07	down
MEDN1012	7-Methylguanine	Nucleotide and Its metabolites	Nucleotide and Its metabolites	C6H7N5O	2	578-76-7	38400	18800	42700	46900	39900	63000	45600	33900	19900	40800	52700	42100	0.223	0.751	1.06	0.0869	insig
MEDP1072*159	7-Methylguanosine	Nucleotide and Its metabolites	Nucleotide and Its metabolites	C11H15N5O5	1	20244-86-4	2630000	3110000	2430000	3950000	2400000	2560000	2630000	2490000	2970000	3440000	3690000	2700000	0.318	0.669	0.954	-0.0684	insig
MEDP0299	7-Methyluric Acid	Amino acid and Its metabolites	Amino acid derivatives	C6H6N4O3	2	612-37-3	1170000	1430000	1310000	1190000	930000	1050000	1390000	1350000	1220000	1090000	1130000	1480000	0.623	0.338	0.924	-0.113	insig
MEDP0157	7-Methylxanthine	Nucleotide and Its metabolites	Nucleotide and Its metabolites	C6H6N4O2	2	552-62-5	39500	51100	64500	54400	46200	46900	64100	36500	54300	43500	46100	31300	0.44	0.477	1.1	0.133	insig
MEDP1498	8-Azaguanine	Nucleotide and Its metabolites	Nucleotide and Its metabolites	C4H4N6O	1	134-58-7	851000	1230000	964000	1200000	1200000	1190000	1230000	841000	1140000	1350000	1430000	830000	0.102	0.812	0.973	-0.0388	insig
MEDP0158	8-Hydroxyguanosine	Nucleotide and Its metabolites	Nucleotide and Its metabolites	C10H13N5O6	1	3868-31-3	1340000	1090000	1020000	1100000	1310000	1210000	1700000	1200000	1480000	1400000	1360000	1380000	1.29	0.0187	0.83	-0.269	down
MEDN2290	AMC Arachidonoyl Amide	FA	Others	C30H39NO3	2	862913-13-1	48400	10500	31600	49700	23300	16100	24900	62700	31600	41300	39500	31600	0.684	0.339	0.776	-0.367	insig
MEDP1002	Acetylcholine	Alcohol and amines	Polyamines	C7H15NO2	1	60-31-1	293000	257000	253000	548000	428000	500000	369000	539000	774000	506000	721000	525000	1.12	0.039	0.664	-0.591	down
MEDN1518	Acetylvaline	Amino acid and Its metabolites	Amino acid derivatives	C7H13NO3	1	96-81-1	49700	64400	60200	58900	65500	56600	54000	61900	64500	55000	69000	60900	0.314	0.621	0.972	-0.0405	insig
MEDP1740	Acrylamide	Alcohol and amines	Amines	C3H5NO	2	29000	412000	340000	343000	508000	382000	367000	408000	604000	500000	487000	484000	437000	1.23	0.0303	0.806	-0.312	down
MEDN0151	Adenine	Nucleotide and Its metabolites	Nucleotide and Its metabolites	C5H5N5	2	73-24-5	114000	61400	94400	64200	98800	47500	38000	21200	18200	10700	21800	39900	1.64	0.00215	3.21	1.68	up
MEDP0160	Adenosine	Nucleotide and Its metabolites	Nucleotide and Its metabolites	C10H13N5O4	1	58-61-7	39200000	21600000	43600000	25600000	32900000	22300000	21500000	19600000	17300000	20700000	15900000	19800000	1.42	0.0249	1.61	0.691	up
MEDP0161	Adenosine 5'-Diphosphate（ADP）	Nucleotide and Its metabolites	Nucleotide and Its metabolites	C10H15N5O10P2	1	58-64-0	194000	93600	216000	306000	196000	227000	101000	291000	293000	369000	237000	224000	0.409	0.337	0.814	-0.296	insig
MEDN0153	Adenosine 5'-Monophosphate	Nucleotide and Its metabolites	Nucleotide and Its metabolites	C10H14N5O7P	1	61-19-8	158000	204000	190000	269000	206000	213000	296000	360000	346000	279000	264000	238000	1.5	0.00447	0.696	-0.523	down
MEDN0299	Adipic Acid	Organic acid and Its derivatives	Organic acid and Its derivatives	C6H10O4	2	124-04-9	138000	209000	180000	244000	350000	182000	189000	355000	245000	220000	245000	164000	0.375	0.646	0.919	-0.122	insig
MEDP1741	Agmatine	Alcohol and amines	Polyamines	C5H14N4	1	306-60-5	3440000	1640000	1740000	2500000	1880000	2030000	3770000	2910000	2090000	2680000	4000000	3560000	1.13	0.0399	0.697	-0.521	down
MEDP0041	Ala-Ala	Amino acid and Its metabolites	Small Peptide	C6H12N2O3	2	1948-31-8	26700	20100	31800	28000	29000	24400	21400	30400	31400	14900	41000	37300	0.136	0.545	0.907	-0.141	insig
MEDN2105*041	Ala-Asn	Amino acid and Its metabolites	Small Peptide	C7H13N3O4	2	31796-57-3	8820	12100	11200	8760	24400	6420	10000	7070	22200	20900	15100	19900	0.643	0.31	0.754	-0.408	insig
MEDN1925	Ala-Glu	Amino acid and Its metabolites	Small Peptide	C8H14N2O5	2	13187-90-1	41000	49700	70400	39700	88300	65000	84100	83500	92600	82600	58800	73000	1.12	0.0575	0.746	-0.422	insig
MEDP2554	Ala-His	Amino acid and Its metabolites	Small Peptide	C9H14N4O3	1	3253-17-6	187000	28900	56100	43000	51300	49100	35700	14700	25900	45200	90600	137000	0.423	0.725	1.19	0.251	insig
MEDP0087*136	Ala-Lys	Amino acid and Its metabolites	Amino acid derivatives	C9H19N3O3	1	6366-77-4	218000	240000	322000	253000	279000	242000	219000	269000	208000	191000	202000	212000	1.15	0.0497	1.19	0.256	up
MEDP2551	Ala-Met	Amino acid and Its metabolites	Small Peptide	C8H16N2O3S	2	14486-05-6	1810	2680	4630	12100	8060	14900	8920	11800	1640	2990	6070	2070	0.37	0.529	1.32	0.401	insig
MEDP1742	Ala-Phe	Amino acid and Its metabolites	Small Peptide	C12H16N2O3	2	3061-90-3	192000	216000	259000	368000	292000	301000	155000	257000	314000	253000	251000	259000	0.432	0.504	1.09	0.128	insig
MEDP2365	Ala-Pro	Amino acid and Its metabolites	Small Peptide	C8H14N2O3	1	13485-59-1	998000	946000	957000	894000	1050000	983000	1150000	1150000	939000	844000	1030000	1070000	0.58	0.295	0.941	-0.0882	insig
MEDP1771	Ala-gln	Amino acid and Its metabolites	Small Peptide	C8H15N3O4	2	39537-23-0	36400	38200	41400	19800	16800	22100	22000	29100	32000	15900	46300	12200	0.246	0.679	1.11	0.149	insig
MEDN2101*032	Aldehydo-D-altrose	Carbohydrates and Its metabolites	Sugars	C6H12O6	2	1990-29-0	356000	318000	344000	473000	256000	456000	311000	507000	450000	514000	388000	279000	0.443	0.457	0.9	-0.152	insig
MEDN1476	Allantoic acid	Amino acid and Its metabolites	Amino acid derivatives	C4H8N4O4	2	99-16-1	46200	37300	48600	31800	42400	31900	37700	76400	68100	52300	51800	78300	1.31	0.0224	0.654	-0.613	down
MEDP1093	Allopurinol	Nucleotide and Its metabolites	Nucleotide and Its metabolites	C5H4N4O	1	315-30-0	47200000	45000000	50700000	31300000	45400000	42700000	47500000	52800000	55200000	34800000	57200000	45400000	0.652	0.263	0.895	-0.159	insig
MEDP2002*115	Aminolevulinic acid	Organic acid and Its derivatives	Organic acid and Its derivatives	C5H9NO3	2	106-60-5	608000	452000	688000	565000	598000	469000	656000	1110000	879000	869000	1050000	923000	1.59	0.00152	0.617	-0.697	down
MEDN0478	Aminomalonic Acid	Organic acid and Its derivatives	Organic acid and Its derivatives	C3H5NO4	2	1068-84-4	344000	347000	344000	448000	393000	368000	324000	493000	427000	374000	458000	366000	0.591	0.306	0.918	-0.124	insig
MEDP2349	Ammeline	Heterocyclic compounds	Heterocyclic compounds	C3H5N5O	2	645-92-1	445000	388000	272000	315000	481000	193000	543000	418000	365000	368000	539000	340000	0.845	0.198	0.814	-0.297	insig
MEDN1609	Ampicillin	Benzene and substituted derivatives	Benzene and substituted derivatives	C16H19N3O4S	2	69-53-4	29000	16800	17600	23700	19700	19100	21400	28100	27700	21800	26700	27900	1.04	0.0727	0.82	-0.287	insig
MEDP2059	Androstenediol	Hormones and hormone related compounds	Hormones and hormone related compounds	C19H30O2	2	521-17-5	704000	623000	752000	737000	752000	633000	820000	768000	691000	638000	705000	738000	0.42	0.471	0.964	-0.0536	insig
MEDP1644	Aniline	Alcohol and amines	Amines	C6H7N	1	62-53-3	106000	123000	157000	135000	107000	79600	122000	114000	123000	125000	131000	130000	0.467	0.601	0.95	-0.0742	insig
MEDP2594	Arg-Asp	Amino acid and Its metabolites	Small Peptide	C10H19N5O5	2	15706-88-4	30400	10400	17000	14500	29100	20100	2160	12500	13100	8380	12200	8060	1.24	0.0197	2.16	1.11	up
MEDP2324	Arg-Glu	Amino acid and Its metabolites	Small Peptide	C11H21N5O5	2	79220-32-9	13600	39700	28100	37300	33400	25100	16700	18700	13800	21400	14600	25800	1.16	0.0369	1.6	0.675	up
MEDN2114*046	Arg-Gly	Amino acid and Its metabolites	Small Peptide	C8H17N5O3	2	108347-93-9	10400	9580	10300	11400	9130	8790	15000	13000	12700	7800	13200	9830	0.888	0.125	0.831	-0.267	insig
MEDP2363	Arg-Ile	Amino acid and Its metabolites	Small Peptide	C12H25N5O3	2	62632-70-6	28400	27500	18000	46900	17400	37500	13800	27000	32000	18000	38400	15500	0.507	0.424	1.21	0.279	insig
MEDN2271	Arg-Phe-Val-Asp	Amino acid and Its metabolites	Small Peptide	C24H37N7O7	2	-	42200	37100	35400	34400	36600	35700	60600	54600	65000	44400	44300	37400	1.46	0.0221	0.723	-0.468	down
MEDP2492	Arg-Ser	Amino acid and Its metabolites	Small Peptide	C9H19N5O4	2	-	45600	56500	26500	39700	34500	52200	54600	56900	51400	39500	37600	50900	0.662	0.315	0.877	-0.19	insig
MEDN1919*041	Asn-Ala	Amino acid and Its metabolites	Small Peptide	C7H13N3O4	2	20917-57-1	8820	12100	11200	8760	24400	6420	10000	7070	22200	20900	15100	19900	0.643	0.31	0.754	-0.408	insig
MEDN1922	Asn-Glu	Amino acid and Its metabolites	Small Peptide	C9H15N3O6	2	20917-58-2	10200	19000	6190	21000	24300	9500	18900	7320	21200	11600	25100	9970	0.156	0.876	0.958	-0.0626	insig
MEDN1920	Asn-Gly	Amino acid and Its metabolites	Small Peptide	C6H11N3O4	2	67576-72-1	7040	7840	6790	10000	3060	8770	6470	11800	11700	7290	10000	3260	0.342	0.506	0.862	-0.214	insig
MEDP2569	Asn-Leu	Amino acid and Its metabolites	Small Peptide	C10H19N3O4	2	-	122000	102000	86500	145000	68700	111000	98800	54600	130000	65100	112000	107000	0.455	0.509	1.12	0.159	insig
MEDP2505	Asn-Met	Amino acid and Its metabolites	Small Peptide	C9H17N3O4S	2	-	23300	66400	23200	42800	32900	33300	47300	24500	32500	43200	36800	41800	0.229	0.926	0.981	-0.0274	insig
MEDN1949*045	Asn-Val	Amino acid and Its metabolites	Small Peptide	C9H17N3O4	2	145314-87-0	26500	18200	32200	53000	18500	28300	32800	32300	31600	30500	38900	38100	0.645	0.433	0.866	-0.208	insig
MEDP2370	Asp-Arg	Amino acid and Its metabolites	Small Peptide	C10H19N5O5	2	-	18900	51200	67400	30200	85300	94300	25800	37600	55300	35300	39500	28200	0.68	0.156	1.57	0.647	insig
MEDP2438*147	Asp-Ile	Amino acid and Its metabolites	Small Peptide	C10H18N2O5	2	-	718000	776000	726000	991000	896000	948000	1160000	1090000	1130000	807000	1300000	889000	1.17	0.036	0.792	-0.337	down
MEDN2001	Asp-Leu	Amino acid and Its metabolites	Small Peptide	C10H18N2O5	1	3062-14-4	95800	83400	88800	101000	129000	148000	145000	166000	163000	149000	126000	138000	1.37	0.00968	0.727	-0.46	down
MEDP0037	Asp-Phe	Amino acid and Its metabolites	Small Peptide	C13H16N2O5	2	13433-09-5	630000	450000	657000	940000	797000	825000	920000	901000	875000	837000	725000	814000	0.845	0.139	0.848	-0.238	insig
MEDP1851	Asp-Tyr	Amino acid and Its metabolites	Small Peptide	C13H16N2O6	1	22840-03-5	72200	51000	78500	67500	111000	91700	63000	53200	93500	68600	36500	58900	0.815	0.183	1.26	0.336	insig
MEDN1972*047	Asp-Val	Amino acid and Its metabolites	Small Peptide	C9H16N2O5	2	13433-04-0	378000	92900	256000	603000	226000	440000	212000	205000	173000	184000	220000	146000	0.887	0.11	1.75	0.808	insig
MEDP1744	Astaxanthin	Others	Others	C40H52O4	2	472-61-7	9480000	7910000	6620000	7700000	7580000	7220000	13700000	16700000	13700000	11700000	12600000	9590000	1.72	0.00179	0.596	-0.746	down
MEDP0301	Azelaic Acid	Organic acid and Its derivatives	Organic acid and Its derivatives	C9H16O4	1	123-99-9	24500	38400	33000	36500	53300	32400	36300	63600	34400	38800	47400	37900	0.705	0.286	0.844	-0.245	insig
MEDP2753	Azelaoyl PAF	FA	Others	C33H66NO9P	2	354583-69-0	233000	306000	268000	202000	232000	542000	366000	190000	346000	300000	320000	185000	0.0473	0.837	1.05	0.0635	insig
MEDP1033	Benzaldehyde	Benzene and substituted derivatives	Benzene and substituted derivatives	C7H6O	1	100-52-7	7640000	7380000	7750000	8630000	8190000	8330000	8840000	10000000	10200000	9480000	9070000	9700000	1.63	0.000314	0.836	-0.259	down
MEDN0084	Benzoic Acid	Benzene and substituted derivatives	Benzene and substituted derivatives	C7H6O2	1	65-85-0	221000	310000	306000	392000	372000	322000	395000	379000	401000	312000	287000	338000	0.596	0.338	0.911	-0.135	insig
MEDP1818	Bicine	Organic acid and Its derivatives	Organic acid and Its derivatives	C6H13NO4	2	150-25-4	57500	66600	53300	62600	40700	68900	134000	115000	54900	115000	49500	43600	0.804	0.165	0.683	-0.55	insig
MEDP1196	Biotinamide	Alcohol and amines	Polyamines	C10H17N3O2S	2	6929-42-6	316000	389000	446000	498000	472000	452000	288000	542000	401000	452000	446000	373000	0.213	0.797	1.03	0.0398	insig
MEDN1224	Bis(1-inositol)-3,1'-phosphate 1-phosphate	Alcohol and amines	Alcohols	C12H24O17P2	1	-	21600	10600	28000	60000	5160	16000	21900	11100	7320	11600	14500	17600	0.508	0.293	1.68	0.751	insig
MEDP0677	Butylamine	Alcohol and amines	Amines	C4H11N	2	109-73-9	108000	76800	139000	120000	106000	136000	92700	188000	147000	140000	102000	122000	0.535	0.328	0.867	-0.206	insig
MEDP1646	Caldine	Alcohol and amines	Amines	C6H17N3	2	56-18-8	200000	204000	134000	223000	123000	99600	243000	147000	228000	74500	113000	192000	0.0281	0.953	0.987	-0.0182	insig
MEDP2145	Caprolactam	Heterocyclic compounds	Heterocyclic compounds	C6H11NO	2	105-60-2	160000	138000	187000	170000	190000	165000	227000	155000	146000	141000	192000	169000	0.037	0.835	0.981	-0.0281	insig
MEDN0615*014	Carbamoyl phosphate	Organic acid and Its derivatives	Phosphoric acids	CH4NO5P	2	590-55-6	2690000	3180000	3260000	3190000	3380000	2890000	3490000	4960000	3810000	4480000	4060000	3630000	1.55	0.00605	0.761	-0.394	down
MEDP1405	Carnitine C14:0	FA	CAR	C21H41NO4	2	-	176000	230000	150000	166000	130000	147000	220000	365000	273000	223000	229000	244000	1.54	0.00792	0.643	-0.636	down
MEDP1406	Carnitine C14:1	FA	CAR	C21H39NO4	1	-	21400	73000	47400	59900	44500	54500	40000	61300	55200	52900	49000	57300	0.346	0.754	0.952	-0.0707	insig
MEDP1526	Carnitine C15	FA	CAR	C22H43NO4	1	-	38100	72400	58600	53600	65000	56100	82400	96900	109000	83200	84900	77300	1.59	0.000841	0.644	-0.634	down
MEDP1397	Carnitine C16:0	FA	CAR	C23H45NO4	1	-	473000	689000	533000	431000	477000	423000	822000	853000	814000	750000	754000	683000	1.73	0.000343	0.647	-0.628	down
MEDP1398	Carnitine C16:1	FA	CAR	C23H43NO4	2	-	342000	476000	386000	329000	385000	389000	661000	1190000	1180000	986000	935000	938000	1.83	0.000441	0.392	-1.35	down
MEDP1400	Carnitine C16:3	FA	CAR	C23H39NO4	1	-	2610	43900	17600	28400	21000	23000	9660	20600	18400	14300	7180	21700	0.275	0.258	1.49	0.572	insig
MEDP2861	Carnitine C17:1	FA	CAR	C24H45NO4	2	-	90600	111000	103000	71200	90700	75600	133000	256000	236000	204000	205000	202000	1.77	0.00057	0.439	-1.19	down
MEDP1385	Carnitine C17:1:DC	FA	CAR	C24H43NO6	2	-	16400	32800	32700	30800	28700	31400	26100	36500	35500	34100	21200	36900	0.419	0.448	0.908	-0.139	insig
MEDP1389	Carnitine C18:0	FA	CAR	C25H49NO4	1	-	34800	45300	32700	29300	30000	24500	53900	70900	73800	81300	64100	57800	1.79	9.55e-05	0.489	-1.03	down
MEDP1390	Carnitine C18:1	FA	CAR	C25H47NO4	1	-	788000	1230000	995000	702000	913000	769000	1050000	2060000	2080000	1890000	1670000	1600000	1.64	0.00188	0.521	-0.941	down
MEDP1391	Carnitine C18:2	FA	CAR	C25H45NO4	1	-	241000	236000	239000	147000	254000	161000	218000	572000	562000	464000	395000	452000	1.54	0.00576	0.48	-1.06	down
MEDP1387	Carnitine C19:2	FA	CAR	C26H47NO4	2	-	1160000	859000	1020000	880000	988000	919000	1320000	1320000	1080000	1360000	1090000	1270000	1.49	0.00285	0.785	-0.35	down
MEDP2866	Carnitine C20:3	FA	CAR	C27H47NO4	2	-	67500	82000	70600	43700	66500	42600	73200	175000	171000	163000	156000	169000	1.64	0.00148	0.411	-1.28	down
MEDP2868	Carnitine C20:4	FA	CAR	C27H45NO4	2	-	124000	185000	163000	100000	130000	90400	93300	305000	295000	226000	252000	246000	1.24	0.0189	0.559	-0.838	down
MEDP1383	Carnitine C20:5	FA	CAR	C27H43NO4	2	-	8840	22500	42500	9490	40400	6240	18400	81400	64000	38700	40800	58100	1.22	0.0312	0.431	-1.21	down
MEDP2823	Carnitine C22:1	FA	CAR	C29H55NO4	2	-	223000	128000	143000	96200	148000	108000	163000	276000	209000	282000	205000	133000	1.21	0.0452	0.667	-0.585	down
MEDP2870	Carnitine C22:5	FA	CAR	C29H47NO4	2	-	43900	37300	39400	18700	34900	24400	21300	72200	71000	63000	55000	64700	1.14	0.0231	0.572	-0.805	down
MEDP2872	Carnitine C24:6	FA	CAR	C31H49NO4	2	-	39400	26400	25200	36000	31000	25300	35200	32900	31800	34800	34200	30200	0.677	0.346	0.92	-0.12	insig
MEDP2864	Carnitine C26:1	FA	CAR	C33H63NO4	2	-	15800	7010	8090	15000	6190	11900	18000	9700	18000	6270	9380	6300	0.0912	0.83	0.945	-0.0813	insig
MEDP1665	Carnitine C3:0	FA	CAR	C10H19NO4	1	17298-37-2	16700000	13200000	19900000	23400000	21300000	17600000	10700000	21300000	17900000	16600000	14800000	16700000	0.678	0.278	1.14	0.195	insig
MEDP1442*140	Carnitine C4:0	FA	CAR	C11H21NO4	2	-	1900000	2200000	2730000	2630000	2670000	2410000	1330000	2570000	2070000	2320000	1970000	2190000	0.864	0.142	1.17	0.224	insig
MEDP2814	Carnitine C5-OH	FA	CAR	C12H23NO5	2	-	276000	744000	410000	278000	855000	331000	752000	1100000	499000	959000	1100000	876000	1.3	0.0172	0.548	-0.868	down
MEDP1440*146	Carnitine C5:0	FA	CAR	C12H23NO4	1	-	5570000	6450000	7580000	6920000	7380000	6870000	5840000	11000000	7570000	8540000	8950000	8130000	1	0.0815	0.814	-0.297	insig
MEDP1441	Carnitine C5:1	FA	CAR	C12H21NO4	1	-	340000	438000	436000	508000	460000	457000	339000	591000	430000	532000	451000	400000	0.186	0.695	0.961	-0.0569	insig
MEDP0577*140	Carnitine isoC4:0	FA	CAR	C11H21NO4	1	25518-49-4	1900000	2200000	2730000	2630000	2670000	2410000	1330000	2570000	2070000	2320000	1970000	2190000	0.864	0.142	1.17	0.224	insig
MEDP1433	Carnitine ph-C1	FA	CAR	C14H19NO4	2	105450-08-6	22200	36900	37900	43500	33500	30300	10500	45600	24700	40800	46000	43500	0.177	0.866	0.967	-0.048	insig
MEDP1382	Carnitine ph-C14	FA	CAR	C27H45NO4	2	-	127000	171000	156000	94600	110000	84900	114000	288000	276000	223000	261000	268000	1.45	0.00565	0.52	-0.945	down
MEDP0618*146	Carnitine-2-methyl-C4	FA	CAR	C12H23NO4	1	31023-25-3	5570000	6450000	7580000	6920000	7380000	6870000	5840000	11000000	7570000	8540000	8950000	8130000	1	0.0815	0.814	-0.297	insig
MEDP0428	Cholesterol	Hormones and hormone related compounds	Hormones and hormone related compounds	C27H46O	2	57-88-5	540000	358000	452000	610000	500000	633000	625000	535000	520000	656000	506000	462000	0.403	0.513	0.936	-0.0952	insig
MEDN1723*077	Cholic acid	Bile acids	Bile acids	C24H40O5	2	81-25-4	135000	78600	96100	161000	104000	173000	158000	192000	184000	111000	191000	188000	1.03	0.0449	0.729	-0.456	down
MEDP0125	Choline	Tryptamines,Cholines,Pigments	Cholines	C5H14NO+	1	62-49-7	76700000	71400000	57200000	65300000	76600000	71000000	50000000	47800000	58400000	40700000	58000000	53200000	1.55	0.0012	1.36	0.441	up
MEDP1490	Cis-4-Hydroxy-L-Proline	Amino acid and Its metabolites	Amino acid derivatives	C5H9NO3	1	2584-71-6	426000	417000	552000	528000	436000	434000	543000	666000	728000	589000	659000	651000	1.61	0.000647	0.728	-0.459	down
MEDN0203	Cis-Aconitic Acid	Organic acid and Its derivatives	Organic acid and Its derivatives	C6H6O6	2	585-84-2	112000	69400	160000	173000	113000	72900	86400	213000	82200	153000	86700	140000	0.176	0.721	0.92	-0.12	insig
MEDN0206*019	Citramalic Acid	Organic acid and Its derivatives	Organic acid and Its derivatives	C5H8O5	2	597-44-4	223000	495000	430000	262000	392000	327000	182000	320000	319000	305000	312000	217000	0.767	0.144	1.29	0.364	insig
MEDN0198*036	Citric Acid	Organic acid and Its derivatives	Organic acid and Its derivatives	C6H8O7	1	77-92-9	2010000	285000	231000	1800000	650000	1050000	208000	609000	554000	316000	154000	324000	1.02	0.0937	2.78	1.48	insig
MEDP2756	Cocamidopropyl betaine	FA	Others	C19H38N2O3	2	61789-40-0	1040000	1080000	1110000	1540000	1170000	876000	1480000	1070000	1180000	1400000	1130000	1020000	0.466	0.528	0.937	-0.0938	insig
MEDP1006	Creatine	Organic acid and Its derivatives	Organic acid and Its derivatives	C4H9N3O2	1	57-00-1	13800000	12500000	14600000	18100000	16800000	14900000	25700000	43100000	33800000	32100000	32100000	26900000	1.79	0.000615	0.468	-1.1	down
MEDN0306	Creatine phosphate	Nucleotide and Its metabolites	Nucleotide and Its metabolites	C4H10N3O5P	1	24700	800000	665000	769000	724000	873000	648000	747000	738000	663000	524000	693000	779000	0.648	0.301	1.08	0.112	insig
MEDP0745	Creosol	Benzene and substituted derivatives	Phenolics	C8H10O2	2	93-51-6	1390000	1760000	1290000	1470000	2140000	1570000	1140000	1150000	1270000	998000	1100000	1550000	1.33	0.0259	1.33	0.413	up
MEDN1236	Cyclic ADP ribose	Nucleotide and Its metabolites	Nucleotide and Its metabolites	C15H21N5O13P2	1	119340-53-3	601000	445000	690000	752000	509000	300000	465000	1100000	1280000	467000	621000	728000	0.802	0.184	0.708	-0.499	insig
MEDN0421	Cyclic Amp	Nucleotide and Its metabolites	Nucleotide and Its metabolites	C10H12N5O6P	1	60-92-4	1070000	1490000	1570000	1130000	1080000	1220000	994000	1020000	1060000	1130000	1150000	949000	1.09	0.0656	1.2	0.263	insig
MEDP1923	Cyclo(Phe-Glu)	Amino acid and Its metabolites	Small Peptide	C14H16N2O4	2	-	80400	58400	83600	89700	104000	88900	79000	57400	80600	79800	75600	86500	0.611	0.326	1.1	0.137	insig
MEDP2326	Cyclocreatine	Nucleotide and Its metabolites	Nucleotide and Its metabolites	C5H9N3O2	2	35404-50-3	2650000	1800000	2560000	2640000	3000000	2090000	4620000	2970000	2650000	2720000	3600000	2810000	1.11	0.0638	0.761	-0.394	insig
MEDP2528	Cycloleucine	Amino acid and Its metabolites	Amino acid derivatives	C6H11NO2	1	52-52-8	19400000	18000000	19000000	22500000	23200000	15400000	14100000	18800000	25000000	16100000	21400000	16700000	0.295	0.676	1.05	0.0655	insig
MEDP1933*117	Cyclopentylglycine	Amino acid and Its metabolites	Amino acid derivatives	C7H13NO2	2	2521-84-8	180000	292000	197000	181000	257000	195000	101000	123000	89800	61500	138000	123000	1.63	0.000933	2.05	1.04	up
MEDP1748	Cyromazine	Heterocyclic compounds	Heterocyclic compounds	C6H10N6	1	66215-27-8	282000	305000	388000	375000	336000	422000	350000	261000	354000	357000	427000	290000	0.26	0.723	1.03	0.049	insig
MEDP0409	Cys-Gly	Amino acid and Its metabolites	Small Peptide	C5H10N2O3S	2	19246-18-5	67800	76800	102000	93800	139000	155000	53100	81400	79100	65700	98700	58200	1.12	0.0719	1.45	0.54	insig
MEDN1910	Cys-Pro	Amino acid and Its metabolites	Small Peptide	C8H14N2O3S	2	-	2070000	2370000	3060000	3130000	2160000	2570000	2930000	2120000	2510000	2070000	1770000	2610000	0.546	0.389	1.1	0.134	insig
MEDP1295	Cytarabine	Nucleotide and Its metabolites	Nucleotide and Its metabolites	C9H13N3O5	1	147-94-4	186000	146000	126000	178000	45500	51200	175000	69900	160000	65800	117000	74800	0.0153	0.719	1.11	0.146	insig
MEDN0155	Cytidine	Nucleotide and Its metabolites	Nucleotide and Its metabolites	C9H13N3O5	1	65-46-3	2570	10800	8730	11800	8700	10400	10700	13400	12200	7930	4450	8850	0.282	0.696	0.921	-0.119	insig
MEDP0877	Cytidine 5'-Diphosphocholine	Nucleotide and Its metabolites	Nucleotide and Its metabolites	C14H26N4O11P2	1	987-78-0	269000	484000	399000	498000	473000	514000	324000	585000	444000	398000	378000	386000	0.19	0.712	1.05	0.0672	insig
MEDP1749	Cytidine 5'-diphosphate	Nucleotide and Its metabolites	Nucleotide and Its metabolites	C9H15N3O11P2	2	63-38-7	18100000	13100000	14000000	19800000	8280000	8470000	18600000	7570000	19700000	5780000	8500000	15000000	0.301	0.734	1.09	0.121	insig
MEDN1529	Cytidine 5'-monophosphate-N-acetylneuraminic acid（CMP-NANA）	Nucleotide and Its metabolites	Nucleotide and Its metabolites	C20H31N4O16P	2	3063-71-6	162000	215000	165000	178000	187000	161000	192000	216000	88600	205000	131000	190000	0.34	0.741	1.04	0.0627	insig
MEDP0164	Cytidine-5-Monophosphate	Nucleotide and Its metabolites	Nucleotide and Its metabolites	C9H14N3O8P	1	63-37-6	236000	252000	391000	221000	214000	333000	210000	318000	312000	185000	222000	428000	0.0452	0.925	0.984	-0.024	insig
MEDP0165	Cytosine	Nucleotide and Its metabolites	Nucleotide and Its metabolites	C4H5N3O	1	71-30-7	295000	538000	345000	408000	255000	400000	448000	243000	329000	265000	183000	310000	0.772	0.191	1.26	0.334	insig
MEDP2529	D-Alloisoleucine	Amino acid and Its metabolites	Amino acids	C6H13NO2	1	1509-35-9	207000000	183000000	202000000	230000000	212000000	217000000	248000000	262000000	297000000	244000000	281000000	279000000	1.65	0.000273	0.777	-0.364	down
MEDN1762*032	D-Allose	Carbohydrates and Its metabolites	Sugars	C6H12O6	2	2595-97-3	356000	318000	344000	473000	256000	456000	311000	507000	450000	514000	388000	279000	0.443	0.457	0.9	-0.152	insig
MEDN0228*020	D-Arabinose	Carbohydrates and Its metabolites	Sugars	C5H10O5	2	147-81-9	111000	94500	58700	93200	126000	86300	136000	138000	105000	107000	35700	120000	0.171	0.525	0.889	-0.17	insig
MEDN1614*044	D-Arabinose?5-phosphate	Carbohydrates and Its metabolites	Phosphate sugars	C5H11O8P	1	13137-52-5	20600000	20400000	14000000	8650000	16700000	14700000	22800000	12900000	16700000	22100000	17000000	15200000	0.559	0.44	0.891	-0.167	insig
MEDN1055	D-Calcium Pantothenate	CoEnzyme and vitamins	CoEnzyme and vitamins	C18H34N2O10	1	137-08-6	100000	172000	299000	208000	255000	101000	71600	242000	216000	116000	199000	120000	0.339	0.523	1.18	0.235	insig
MEDN0226	D-Erythronolactone	Aldehyde,Ketones,Esters	Esters	C4H6O4	1	15667-21-7	3350000	5800000	5860000	5330000	6600000	2740000	3170000	2490000	5470000	5610000	2740000	3110000	0.71	0.195	1.31	0.394	insig
MEDN0463	D-Fructose 6-Phosphate-Disodium Salt	Carbohydrates and Its metabolites	Phosphate sugars	C6H11Na2O9P	1	26177-86-6	1730000	1660000	2150000	3600000	1980000	2110000	4100000	2560000	2920000	1770000	2550000	2210000	0.688	0.297	0.821	-0.284	insig
MEDN0485	D-Fructose-1,6-Biphosphate-Trisodium Salt	Carbohydrates and Its metabolites	Phosphate sugars	C6H16NaO13P2	2	81028-91-3	272000	216000	342000	344000	273000	385000	439000	265000	358000	380000	252000	255000	0.254	0.644	0.94	-0.0895	insig
MEDP0236	D-Gluconic Acid	Carbohydrates and Its metabolites	Sugar acids	C6H12O7	2	526-95-4	664000	1220000	965000	1260000	673000	1020000	985000	639000	567000	484000	765000	1420000	0.671	0.4	1.19	0.253	insig
MEDP0234*125	D-Glucono-1,5-Lactone	Carbohydrates and Its metabolites	Sugar acids	C6H10O6	2	90-80-2	5090	8720	17900	120000	20900	27500	25100	27100	10600	19900	13900	21200	0.113	0.476	1.7	0.766	insig
MEDP1761*126	D-Glucosamine	Carbohydrates and Its metabolites	Sugar acids	C6H13NO5	2	3416-24-8	30200	36000	33900	38900	28100	28000	28500	23900	18600	10500	41800	28000	0.91	0.165	1.29	0.367	insig
MEDN0832	D-Glucosamine 6-Phosphate	Carbohydrates and Its metabolites	Phosphate sugars	C6H14NO8P	2	3616-42-0	84500	63200	45700	51600	42200	45800	66400	33300	66900	45600	86000	58800	0.208	0.697	0.933	-0.1	insig
MEDP1753	D-Glucosaminic acid	Carbohydrates and Its metabolites	Sugar acids	C6H13NO6	2	3646-68-2	76300	29800	43300	46800	54300	42300	62500	65300	55500	25400	68600	36600	0.154	0.723	0.933	-0.0997	insig
MEDN0220*032	D-Glucose	Carbohydrates and Its metabolites	Sugars	C6H12O6	1	50-99-7	356000	318000	344000	473000	256000	456000	311000	507000	450000	514000	388000	279000	0.443	0.457	0.9	-0.152	insig
MEDN0227*049	D-Glucose 6-Phosphate	Carbohydrates and Its metabolites	Phosphate sugars	C6H13O9P	2	56-73-5	6050000	1050000	2110000	3920000	1910000	2500000	12600000	8660000	5270000	5280000	6500000	9570000	1.45	0.0059	0.366	-1.45	down
MEDN0593	D-Malic acid	Organic acid and Its derivatives	Organic acid and Its derivatives	C4H6O5	1	636-61-3	322000	614000	484000	423000	443000	533000	263000	227000	406000	390000	400000	330000	1.19	0.0275	1.4	0.484	up
MEDP0218	D-Mannitol	Carbohydrates and Its metabolites	Sugar alcohols	C6H14O6	1	69-65-8	114000	78400	95900	112000	146000	71300	111000	128000	78400	118000	68500	34200	0.437	0.484	1.15	0.201	insig
MEDN0221*032	D-Mannose	Carbohydrates and Its metabolites	Sugars	C6H12O6	2	3458-28-4	356000	318000	344000	473000	256000	456000	311000	507000	450000	514000	388000	279000	0.443	0.457	0.9	-0.152	insig
MEDN1221*049	D-Mannose 6-phosphate	Carbohydrates and Its metabolites	Phosphate sugars	C6H13O9P	1	3672-15-9	6050000	1050000	2110000	3920000	1910000	2500000	12600000	8660000	5270000	5280000	6500000	9570000	1.45	0.0059	0.366	-1.45	down
MEDP0228*168	D-Melezitose	Carbohydrates and Its metabolites	Sugars	C18H32O16	2	597-12-6	57600	28200	83500	36800	38300	28100	49900	42000	60400	47800	60200	58200	0.693	0.442	0.856	-0.225	insig
MEDP2003	D-Ornithine	Amino acid and Its metabolites	Amino acids	C5H12N2O2	1	348-66-3	110000	166000	74200	147000	175000	71100	470000	495000	503000	575000	559000	459000	1.82	5e-08	0.243	-2.04	down
MEDN1114	D-Ribono-1,4-lactone	Carbohydrates and Its metabolites	Sugar acids	C5H8O5	1	1260000	70400	46000	52900	53000	89800	58500	67000	53800	76300	67100	75600	50700	0.328	0.686	0.949	-0.0749	insig
MEDN1955	D-Saccharic Acid 1,4-lactone (hydrate)	Carbohydrates and Its metabolites	Sugars	C6H8O7	2	61278-30-6	158000	160000	227000	205000	248000	161000	136000	180000	190000	136000	115000	101000	1.11	0.0427	1.35	0.433	up
MEDN0461	D-Sedoheptuiose 7-Phosphate	Carbohydrates and Its metabolites	Phosphate sugars	C7H15O10P	1	2646-35-7	4430000	4100000	4680000	4430000	4590000	4340000	4480000	4000000	3980000	4740000	4120000	3250000	0.776	0.18	1.08	0.113	insig
MEDN1761*032	D-Talose	Carbohydrates and Its metabolites	Sugars	C6H12O6	2	2595-98-4	356000	318000	344000	473000	256000	456000	311000	507000	450000	514000	388000	279000	0.443	0.457	0.9	-0.152	insig
MEDN0225*020	D-Xylose	Carbohydrates and Its metabolites	Sugars	C5H10O5	2	58-86-6	111000	94500	58700	93200	126000	86300	136000	138000	105000	107000	35700	120000	0.171	0.525	0.889	-0.17	insig
MEDN0657*044	D-Xylulose 5-phosphate	Carbohydrates and Its metabolites	Phosphate sugars	C5H11O8P	1	4212-65-1	20600000	20400000	14000000	8650000	16700000	14700000	22800000	12900000	16700000	22100000	17000000	15200000	0.559	0.44	0.891	-0.167	insig
MEDN1935	D-ribonate lithium salt	Carbohydrates and Its metabolites	Sugars	C5H10O6	2	642-98-8	26400	34500	44800	22900	39200	31600	30700	43900	27100	48900	33700	26400	0.262	0.716	0.947	-0.0791	insig
MEDN0391	DHA	FA	FFA	C22H32O2	1	6217-54-5	6590000	807000	5510000	5890000	5020000	4720000	5510000	6830000	5430000	6620000	6180000	6070000	0.657	0.171	0.778	-0.361	insig
MEDP2016	DL-2-Methylglutamic acid	Amino acid and Its metabolites	Amino acids	C6H11NO4	2	71-90-9	19300	23800	19800	45200	31900	12400	12500	22900	18000	10500	36400	22800	0.509	0.441	1.24	0.308	insig
MEDN1139	DL-2-hydroxystearic acid	FA	FFA	C18H36O3	1	629-22-1	1250000	993000	1130000	2560000	4180000	2790000	3470000	5370000	2660000	3100000	2420000	2820000	0.994	0.117	0.65	-0.622	insig
MEDN0541	DL-3,4-Dihydroxyphenyl glycol	Benzene and substituted derivatives	Benzene and substituted derivatives	C8H10O4	2	28822-73-3	21900	25900	24600	36200	35300	26200	36600	44400	36700	30100	41700	34300	1.27	0.0191	0.76	-0.397	down
MEDP1855	DL-Aminopimelic acid	Organic acid and Its derivatives	Organic acid and Its derivatives	C7H13NO4	1	627-76-9	94200	86900	149000	77400	101000	67900	80800	108000	42400	141000	160000	137000	0.209	0.489	0.861	-0.216	insig
MEDP0523	DL-Carnitine	FA	CAR	C7H15NO3	1	541-15-1	283000	402000	280000	353000	417000	385000	399000	535000	374000	455000	469000	444000	1.24	0.0198	0.792	-0.337	down
MEDP0752*114	DL-Leucine	Amino acid and Its metabolites	Amino acids	C6H13NO2	2	328-39-2	95200000	158000000	171000000	56200000	188000000	173000000	205000000	255000000	82500000	226000000	230000000	74200000	0.458	0.35	0.785	-0.349	insig
MEDN1763	DL-O-tyrosine	Amino acid and Its metabolites	Amino acid derivatives	C9H11NO3	1	2370-61-8	276000	317000	271000	324000	286000	323000	287000	372000	358000	344000	424000	335000	1.21	0.0336	0.847	-0.24	down
MEDN2034	DL-phenylmercapto uric acid	Benzene and substituted derivatives	Benzene and substituted derivatives	C11H13NO3S	2	20640-68-0	18700	18400	19100	16700	22800	15700	24000	17800	16600	17500	23000	18000	0.328	0.603	0.955	-0.0666	insig
MEDN2050	Daidzein	Benzene and substituted derivatives	Benzene and substituted derivatives	C15H10O4	2	486-66-8	999000	297000	324000	319000	368000	346000	388000	354000	332000	376000	346000	379000	0.299	0.509	1.22	0.287	insig
MEDP2024	Dehydroascorbic acid	Organic acid and Its derivatives	Organic acid and Its derivatives	C6H6O6	2	490-83-5	129000	102000	105000	123000	113000	109000	131000	119000	100000	99000	151000	133000	0.434	0.379	0.929	-0.107	insig
MEDN0158*051	Deoxyguanosine	Nucleotide and Its metabolites	Nucleotide and Its metabolites	C10H13N5O4	1	961-07-9	310000	648000	430000	313000	1020000	241000	602000	352000	458000	866000	866000	341000	0.516	0.582	0.848	-0.237	insig
MEDN0602	Deoxyguanosine 5'-monophosphate(dGMP)	Nucleotide and Its metabolites	Nucleotide and Its metabolites	C10H14N5O7P	2	902-04-5	837000	745000	659000	853000	1050000	828000	924000	1410000	1400000	1350000	911000	997000	1.35	0.0191	0.712	-0.489	down
MEDP0836	Dibutyl-phthalate	Aldehyde,Ketones,Esters	Esters	C16H22O4	2	84-74-2	459000000	429000000	411000000	427000000	489000000	392000000	597000000	589000000	603000000	553000000	555000000	494000000	1.73	0.000154	0.769	-0.379	down
MEDP2323	Diethyl-phosphate	Aldehyde,Ketones,Esters	Esters	C4H11O4P	1	598-02-7	346000	187000	249000	333000	287000	221000	296000	388000	204000	214000	239000	196000	0.25	0.727	1.06	0.0782	insig
MEDN1533*012	Dimethylmalonic acid	Organic acid and Its derivatives	Organic acid and Its derivatives	C5H8O4	2	595-46-0	154000	142000	104000	187000	180000	170000	316000	177000	157000	297000	116000	154000	0.664	0.244	0.771	-0.374	insig
MEDN1090	Dioxindole	Heterocyclic compounds	Indole and Its derivatives	C8H7NO2	2	3131-52-0	196000	144000	220000	98400	202000	76900	252000	253000	258000	196000	162000	216000	1.13	0.0484	0.701	-0.512	down
MEDP1055	Dl-Glyceraldehyde 3-Phosphate	Organic acid and Its derivatives	Phosphoric acids	C3H7O6P	1	591-59-3	2160000	1560000	1650000	1160000	1770000	1270000	1800000	949000	989000	1370000	1530000	1300000	0.765	0.199	1.21	0.27	insig
MEDN0311	Dodecanedioic Acid	FA	FFA	C12H22O4	1	693-23-2	274000	210000	299000	464000	1230000	538000	402000	1450000	676000	329000	667000	278000	0.413	0.587	0.792	-0.336	insig
MEDP1857	Eicosanoyl-EA	Organic acid and Its derivatives	Organic acid and Its derivatives	C22H45NO2	2	94421-69-9	11200000	28000000	26800000	34200000	29900000	30400000	40900000	33900000	35400000	32400000	30700000	27400000	0.854	0.114	0.8	-0.322	insig
MEDN1808	Enterostatin	Amino acid and Its metabolites	Small Peptide	C21H36N8O6	2	117830-79-2	16100	5780	11200	9810	9630	20700	33900	36200	24800	32100	24700	28100	1.59	0.000129	0.407	-1.3	down
MEDP0185	Epinephrine	Hormones and hormone related compounds	Hormones and hormone related compounds	C9H13NO3	1	51-43-4	536000	376000	671000	471000	711000	475000	375000	786000	340000	396000	395000	516000	0.627	0.422	1.15	0.207	insig
MEDN1484	Ethionamide	Heterocyclic compounds	Pteridines and derivatives	C8H10N2S	2	536-33-4	5950000	4950000	5200000	5620000	5150000	5570000	4710000	4850000	4760000	4670000	5120000	5590000	1.19	0.0533	1.09	0.127	insig
MEDN1895*012	Ethyl hydrogen malonate	Aldehyde,Ketones,Esters	Esters	C5H8O4	2	1071-46-1	154000	142000	104000	187000	180000	170000	316000	177000	157000	297000	116000	154000	0.664	0.244	0.771	-0.374	insig
MEDP0658	Ethyl-dodecanoate	Alcohol and amines	Amines	C14H28O2	2	106-33-2	72700	76700	83200	64100	111000	82400	74500	64200	81300	72500	70500	88700	0.512	0.417	1.08	0.116	insig
MEDN0413*068	Ethylmalonate	Organic acid and Its derivatives	Organic acid and Its derivatives	C5H8O4	2	601-75-2	13600	11000	7740	13400	13800	7740	17800	33100	27700	19600	21900	25800	1.66	0.00123	0.461	-1.12	down
MEDN0678	Ethylsalicylate	Organic acid and Its derivatives	Organic acid and Its derivatives	C9H10O3	2	118-61-6	6880000	5690000	6040000	6560000	5810000	5970000	5210000	6010000	6200000	4990000	5590000	5620000	1.07	0.0635	1.1	0.136	insig
MEDN2304	FAA(19:0)	FA	FFA	C19H38O2	2	646-30-0	39500	31500	30300	32900	38700	27900	40600	49800	32500	24100	48600	28100	0.386	0.45	0.897	-0.156	insig
MEDN0385	FFA(12:0)	FA	FFA	C12H24O2	1	143-07-7	8230000	6420000	6430000	9500000	13000000	10400000	12200000	16100000	8690000	7820000	11300000	7500000	0.537	0.373	0.85	-0.234	insig
MEDN0807	FFA(14:0)	FA	FFA	C14H28O2	2	544-63-8	117000	56900	46700	97700	110000	122000	156000	135000	117000	53300	69700	89600	0.271	0.594	0.889	-0.17	insig
MEDN2357	FFA(14:1)	FA	FFA	C14H26O2	1	-	646000	830000	907000	836000	566000	912000	1580000	4550000	1460000	1280000	1310000	1330000	1.47	0.0845	0.408	-1.29	insig
MEDN2354	FFA(15:0)	FA	FFA	C15H30O2	2	-	850000	6680000	1160000	707000	849000	699000	1290000	925000	713000	1420000	1010000	420000	0.316	0.42	1.9	0.923	insig
MEDN1159	FFA(15:1)	FA	FFA	C15H28O2	2	84743-29-3	1570000	293000	1070000	900000	871000	1470000	512000	520000	389000	322000	266000	582000	1.34	0.0237	2.39	1.25	up
MEDN1805	FFA(16:1)	FA	FFA	C16H30O2	1	373-49-9	54800000	1430000	66600000	40300000	28300000	21900000	62200000	28700000	27700000	67400000	70500000	21700000	0.531	0.435	0.767	-0.383	insig
MEDN1490	FFA(16:2)	FA	FFA	C16H28O2	1	28290-73-5	2270000	1260000	1560000	1750000	1690000	1550000	3700000	3430000	3090000	3190000	3320000	2400000	1.74	7.81e-05	0.527	-0.924	down
MEDN2417	FFA(16:4)	FA	FFA	C16H24O2	2	-	328000	254000	341000	570000	340000	333000	576000	347000	602000	445000	579000	252000	0.772	0.184	0.774	-0.369	insig
MEDN1089	FFA(17:1)	FA	FFA	C17H32O2	2	29743-97-3	21200000	18000000	23100000	15600000	16000000	18700000	31400000	35300000	9710000	18600000	27200000	12300000	0.245	0.447	0.838	-0.254	insig
MEDN2355	FFA(18:0)	FA	FFA	C18H36O2	2	-	781000	941000	328000	765000	838000	728000	907000	816000	683000	674000	638000	823000	0.286	0.789	0.965	-0.0518	insig
MEDN0383	FFA(18:2)	FA	FFA	C18H32O2	2	60-33-3	177000000	46900000	159000000	132000000	84600000	84700000	156000000	112000000	42700000	112000000	171000000	29600000	0.285	0.754	1.1	0.133	insig
MEDN2361	FFA(22:5)	FA	FFA	C22H34O2	2	2234-74-4	10900000	1350000	9660000	9720000	6810000	5450000	13500000	10600000	7560000	10100000	12200000	2600000	0.465	0.351	0.776	-0.366	insig
MEDN1079	FFA(22:6)	FA	FFA	C22H32O2	1	25167-62-8	3220000	404000	2250000	2750000	2240000	2280000	2650000	3340000	2820000	2760000	2590000	2890000	0.684	0.163	0.772	-0.374	insig
MEDN1712	Flavin Single Nucleotide(FMN)	CoEnzyme and vitamins	CoEnzyme and vitamins	C17H21N4O9P	1	130-40-5	129000	157000	164000	150000	150000	139000	117000	118000	148000	128000	112000	134000	1.3	0.0144	1.17	0.232	up
MEDP1231*167	Folinic acid	CoEnzyme and vitamins	CoEnzyme and vitamins	C20H23N7O7	1	21300	76400	84000	129000	126000	147000	121000	78100	89800	136000	107000	207000	134000	0.18	0.61	0.907	-0.141	insig
MEDN0490*005	Fumaric Acid	Organic acid and Its derivatives	Organic acid and Its derivatives	C4H4O4	1	110-17-8	209000	79100	254000	254000	305000	266000	314000	233000	198000	212000	253000	176000	0.157	0.934	0.986	-0.0202	insig
MEDN1126*077	Gamma-Mercholic Acid	Bile acids	Bile acids	C24H40O5	2	547-75-1	135000	78600	96100	161000	104000	173000	158000	192000	184000	111000	191000	188000	1.03	0.0449	0.729	-0.456	down
MEDN1654	Gemfibrozil	Others	Medicine	C15H22O3	1	25812-30-0	54400	53100	58000	58800	52200	56500	66600	51000	64200	54100	57800	64800	0.758	0.181	0.929	-0.106	insig
MEDN0636	Ginkgoic acid	Organic acid and Its derivatives	Organic acid and Its derivatives	C22H34O3	2	22910-60-7	24500	29000	24100	34900	47500	50500	23500	31600	51000	55200	21100	21600	0.173	0.894	1.03	0.0446	insig
MEDP2542*133	Gln-Gly	Amino acid and Its metabolites	Small Peptide	C7H13N3O4	2	2650-65-9	70500	134000	88900	53500	164000	34100	151000	134000	209000	142000	186000	149000	1.33	0.0161	0.561	-0.833	down
MEDN1478*053	Glu-Gln	Amino acid and Its metabolites	Small Peptide	C10H17N3O6	2	-	63800	59500	23200	60100	48700	78700	69600	80100	71100	75800	80000	63100	0.973	0.0701	0.76	-0.396	insig
MEDP1653	Glu-Glu	Amino acid and Its metabolites	Small Peptide	C10H16N2O7	1	1116-22-9	357000	294000	351000	409000	370000	243000	341000	225000	327000	282000	270000	287000	0.832	0.134	1.17	0.225	insig
MEDP1671	Glu-Glu-Ile	Amino acid and Its metabolites	Small Peptide	C16H27N3O8	2	-	97500	63800	79000	95600	90100	107000	86500	91900	122000	55000	85000	80700	0.192	0.86	1.02	0.0323	insig
MEDP2355*135	Glu-Gly	Amino acid and Its metabolites	Small Peptide	C7H12N2O5	2	1948-29-4	42100	65400	55900	78900	52200	82900	23200	67200	63300	61200	69000	73000	0.316	0.735	1.06	0.0811	insig
MEDP2325	Glu-His	Amino acid and Its metabolites	Small Peptide	C11H16N4O5	2	37460-15-4	0	0	0	0	0	0	10800	51800	40800	51600	45200	26600	1.89	0.00227	0		down
MEDP2394*151	Glu-Ile	Amino acid and Its metabolites	Small Peptide	C11H20N2O5	2	5879-22-1	2050000	501000	1240000	3180000	1830000	1960000	1410000	2080000	2230000	535000	1500000	2010000	0.164	0.72	1.1	0.139	insig
MEDP1860	Glu-Leu	Amino acid and Its metabolites	Small Peptide	C11H20N2O5	1	2566-39-4	184000	280000	295000	507000	236000	431000	277000	702000	706000	397000	819000	669000	1.19	0.0247	0.541	-0.886	down
MEDP1509	Glu-Met	Amino acid and Its metabolites	Small Peptide	C10H18N2O5S	2	4423-22-7	67200	81200	67700	45800	62200	56000	84300	47200	99100	58000	76900	65900	0.55	0.372	0.881	-0.183	insig
MEDP2597*158	Glu-Phe	Amino acid and Its metabolites	Small Peptide	C14H18N2O5	1	20556-22-3	3300000	2200000	2830000	3330000	2920000	3030000	2810000	3200000	2790000	2940000	2940000	2950000	0.0116	0.983	0.999	-0.00191	insig
MEDN1639	Glu-Thr	Amino acid and Its metabolites	Small Peptide	C9H16N2O6	2	6875-80-5	13600	39400	21600	27400	28600	14700	32300	20400	13300	22100	21400	11600	0.368	0.442	1.2	0.261	insig
MEDN1640	Glu-Tyr	Amino acid and Its metabolites	Small Peptide	C14H18N2O6	1	3422-39-7	36100	26900	27400	32900	34000	32200	42000	43200	39800	35600	44000	38100	1.52	0.00128	0.78	-0.358	down
MEDN1620	Glu-Val	Amino acid and Its metabolites	Small Peptide	C10H18N2O5	2	1450000	35000	51500	7880	32400	53300	39600	61200	58700	69400	81500	74300	52200	1.19	0.00545	0.553	-0.855	down
MEDN0314*012	Glutaric Acid	Organic acid and Its derivatives	Organic acid and Its derivatives	C5H8O4	2	110-94-1	154000	142000	104000	187000	180000	170000	316000	177000	157000	297000	116000	154000	0.664	0.244	0.771	-0.374	insig
MEDN0038	Glutathione Oxidized	Amino acid and Its metabolites	Small Peptide	C20H32N6O12S2	2	121-24-4	535000	160000	166000	382000	176000	429000	218000	195000	140000	142000	228000	200000	0.942	0.13	1.65	0.719	insig
MEDP0044	Glutathione Reducedform	Amino acid and Its metabolites	Small Peptide	C10H17N3O6S	1	70-18-8	1890000	5070000	1850000	2280000	4580000	2170000	2560000	2340000	1810000	5450000	1680000	2100000	0.215	0.709	1.12	0.163	insig
MEDN2115*046	Gly-Arg	Amino acid and Its metabolites	Small Peptide	C8H17N5O3	2	18635-55-7	10400	9580	10300	11400	9130	8790	15000	13000	12700	7800	13200	9830	0.888	0.125	0.831	-0.267	insig
MEDP2313*133	Gly-Gln	Amino acid and Its metabolites	Small Peptide	C7H13N3O4	2	13115-71-4	70500	134000	88900	53500	164000	34100	151000	134000	209000	142000	186000	149000	1.33	0.0161	0.561	-0.833	down
MEDP2546*135	Gly-Glu	Amino acid and Its metabolites	Small Peptide	C7H12N2O5	1	7412-78-4	42100	65400	55900	78900	52200	82900	23200	67200	63300	61200	69000	73000	0.316	0.735	1.06	0.0811	insig
MEDP1670	Gly-Gly-Phe	Amino acid and Its metabolites	Small Peptide	C13H17N3O4	1	6234-26-0	346000	245000	308000	319000	466000	246000	421000	485000	463000	419000	495000	464000	1.44	0.00758	0.702	-0.51	down
MEDP1863	Gly-His	Amino acid and Its metabolites	Small Peptide	C8H12N4O3	2	-	21000	35700	26200	25100	21500	10800	25000	36900	24500	20900	36800	26600	0.756	0.269	0.822	-0.283	insig
MEDP1790	Gly-Ile	Amino acid and Its metabolites	Small Peptide	C8H16N2O3	2	19461-38-2	601000	456000	527000	634000	665000	687000	714000	782000	827000	721000	684000	681000	1.3	0.0108	0.81	-0.304	down
MEDN0059	Gly-Leu	Amino acid and Its metabolites	Amino acid derivatives	C8H16N2O3	1	869-19-2	114000	90100	96400	139000	131000	128000	115000	145000	162000	140000	146000	137000	1.09	0.0381	0.825	-0.277	down
MEDP2312*134	Gly-Lys	Amino acid and Its metabolites	Small Peptide	C8H17N3O3	1	997-62-6	233000	263000	283000	255000	269000	223000	273000	138000	171000	251000	315000	267000	0.524	0.541	1.08	0.11	insig
MEDP0859	Gly-Phe	Amino acid and Its metabolites	Amino acid derivatives	C11H14N2O3	1	519000	6570000	5310000	6590000	9070000	7160000	7530000	6890000	7900000	8880000	6850000	7690000	7100000	0.51	0.413	0.932	-0.102	insig
MEDN0040	Gly-Pro	Amino acid and Its metabolites	Small Peptide	C7H12N2O3	1	704-15-4	1790	29800	9280	26800	12200	13600	14300	12500	24500	11900	31800	18300	0.572	0.556	0.825	-0.278	insig
MEDP2335	Gly-Thr	Amino acid and Its metabolites	Small Peptide	C6H12N2O4	2	7093-70-1	27100	4750	23200	36800	8700	46400	36700	43700	50600	26900	21700	28200	0.768	0.233	0.707	-0.5	insig
MEDP2508	Gly-Tyr	Amino acid and Its metabolites	Amino acid derivatives	C11H14N2O4	1	658-79-7	1360000	912000	978000	1540000	1360000	1290000	1060000	1100000	1450000	1160000	1310000	1090000	0.206	0.709	1.04	0.0537	insig
MEDP1763	Guanidine	Alcohol and amines	Polyamines	CH5N3	2	18300	1450000	991000	1220000	1070000	1610000	1100000	1270000	956000	811000	1100000	1060000	907000	1.01	0.092	1.22	0.288	insig
MEDN0316	Guanidinoethyl Sulfonate	Organic acid and Its derivatives	Sulfonic acids	C3H9N3O3S	1	543-18-0	61300	202000	214000	97000	106000	73300	282000	191000	156000	132000	306000	100000	0.982	0.143	0.645	-0.632	insig
MEDP1276*121	Guanine	Nucleotide and Its metabolites	Nucleotide and Its metabolites	C5H5N5O	1	73-40-5	9810000	12000000	9390000	10100000	10700000	11200000	9840000	7230000	8240000	9910000	9940000	8430000	1.21	0.0255	1.18	0.238	up
MEDP0167	Guanosine	Nucleotide and Its metabolites	Nucleotide and Its metabolites	C10H13N5O5	1	118-00-3	72200000	77600000	88400000	75300000	81800000	79200000	82000000	72400000	85600000	97000000	92100000	80300000	0.756	0.204	0.931	-0.103	insig
MEDP0169	Guanosine-5'-monophosphate	Nucleotide and Its metabolites	Nucleotide and Its metabolites	C10H14N5O8P	2	85-32-5	22700	37300	38300	43800	29800	35300	29600	54800	84900	57900	46700	56900	1.22	0.0375	0.627	-0.675	down
MEDP2458	Heptethylene-glycol	Alcohol and amines	Alcohols	C14H30O8	2	5617-32-3	75100	68500	77100	54400	49400	122000	81200	44800	70300	75400	60900	48900	0.478	0.399	1.17	0.227	insig
MEDP1228	Heterodendrin	Others	Others	C11H19NO6	2	66465-22-3	258000	428000	560000	603000	342000	208000	383000	665000	684000	560000	753000	417000	1.05	0.0766	0.693	-0.529	insig
MEDP0513	Hexadecanamide	Alcohol and amines	Amines	C16H33NO	2	629-54-9	251000	194000	237000	228000	291000	232000	518000	1050000	499000	402000	283000	259000	1.36	0.0759	0.475	-1.07	insig
MEDN0658	Hexadecanedioic acid	FA	FFA	C16H30O4	1	505-54-4	189000	116000	146000	288000	770000	328000	274000	1050000	486000	209000	397000	178000	0.544	0.465	0.709	-0.496	insig
MEDP2068	Hexaethylene-glycol	Alcohol and amines	Alcohols	C12H26O7	2	2615-15-8	157000	182000	189000	146000	162000	246000	249000	111000	170000	148000	154000	105000	0.618	0.376	1.15	0.207	insig
MEDP0047	Histamine	Alcohol and amines	Polyamines	C5H9N3	1	51-45-6	26700	21500	25800	24300	53900	24500	45200	38600	15000	17900	15700	23400	0.427	0.641	1.13	0.181	insig
MEDN1968	Homocitric acid	Organic acid and Its derivatives	Organic acid and Its derivatives	C7H10O7	2	3562-74-1	7310	14400	10900	3610	9040	16100	4330	2020	4920	3320	5020	6170	1.33	0.024	2.38	1.25	up
MEDN0555	Hydroxyphenyllactic acid	Organic acid and Its derivatives	Organic acid and Its derivatives	C9H10O4	2	306-23-0	1790	17300	15100	18300	18900	16800	8690	10900	22000	16200	31000	17800	0.428	0.484	0.827	-0.274	insig
MEDN1656	Hydroxypiperazic?acid	Heterocyclic compounds	Heterocyclic compounds	C5H10N2O3	1	-	519000	969000	635000	719000	1030000	640000	519000	1180000	811000	917000	695000	877000	0.398	0.524	0.903	-0.148	insig
MEDP1060	Hydroxyquinoline	Heterocyclic compounds	Heterocyclic compounds	C9H7NO	1	148-24-3	2260000	2520000	2930000	2960000	2770000	2720000	3180000	3350000	3740000	3130000	3510000	3420000	1.57	0.000675	0.795	-0.331	down
MEDP2550	Hyp-Ser	Amino acid and Its metabolites	Small Peptide	C8H14N2O5	2	-	52500	152000	96100	86400	235000	78300	164000	74600	177000	94200	133000	87500	0.302	0.882	0.96	-0.0595	insig
MEDN2117	Hyp-Thr	Amino acid and Its metabolites	Small Peptide	C9H16N2O5	2	-	148000	52500	90400	200000	146000	101000	115000	207000	159000	110000	92100	135000	0.364	0.629	0.9	-0.151	insig
MEDP2557	Hyp-Val	Amino acid and Its metabolites	Small Peptide	C10H18N2O4	2	-	11200	16100	18400	17800	5220	9530	14300	20800	13500	20900	10000	16500	0.677	0.31	0.815	-0.296	insig
MEDP0874	Hypaphorine	Organic acid and Its derivatives	Organic acid and Its derivatives	C14H18N2O2	1	487-58-1	383000	419000	463000	429000	397000	263000	422000	738000	541000	498000	497000	522000	1.31	0.0226	0.732	-0.451	down
MEDP1197	Hypotaurocyamine	Alcohol and amines	Polyamines	C3H9N3O2S	1	1119-54-6	49300000	61200000	62700000	47700000	47400000	54300000	53900000	47500000	61300000	63800000	71500000	49900000	0.556	0.39	0.927	-0.109	insig
MEDN0163	Hypoxanthine	Nucleotide and Its metabolites	Nucleotide and Its metabolites	C5H4N4O	1	68-94-0	20000000	24300000	25900000	22500000	22800000	25200000	27900000	29500000	29600000	26000000	28200000	24800000	1.46	0.00478	0.846	-0.241	down
MEDN1969	Ile-Ala	Amino acid and Its metabolites	Small Peptide	C9H18N2O3	2	24787-73-3	70000	21400	50100	139000	89500	76400	70500	97100	122000	69200	74100	99300	0.55	0.455	0.838	-0.255	insig
MEDP2570*145	Ile-Asn	Amino acid and Its metabolites	Small Peptide	C10H19N3O4	2	59652-59-4	149000	53300	114000	257000	156000	144000	101000	184000	131000	102000	89500	194000	0.16	0.727	1.09	0.122	insig
MEDP1935*147	Ile-Asp	Amino acid and Its metabolites	Small Peptide	C10H18N2O5	1	-	718000	776000	726000	991000	896000	948000	1160000	1090000	1130000	807000	1300000	889000	1.17	0.036	0.792	-0.337	down
MEDP2386	Ile-Gln	Amino acid and Its metabolites	Small Peptide	C11H21N3O4	2	59652-60-7	216000	76000	220000	387000	187000	252000	189000	257000	281000	115000	206000	260000	0.0201	0.919	1.02	0.0331	insig
MEDP2392*151	Ile-Glu	Amino acid and Its metabolites	Small Peptide	C11H20N2O5	2	42516-53-0	2050000	501000	1240000	3180000	1830000	1960000	1410000	2080000	2230000	535000	1500000	2010000	0.164	0.72	1.1	0.139	insig
MEDP2452	Ile-Ile	Amino acid and Its metabolites	Small Peptide	C12H24N2O3	2	42537-99-5	221000	36000	158000	362000	271000	195000	143000	248000	272000	142000	158000	258000	0.158	0.944	1.02	0.0263	insig
MEDP2453*144	Ile-Leu	Amino acid and Its metabolites	Small Peptide	C12H24N2O3	2	26462-22-6	303000	99300	226000	669000	315000	336000	219000	448000	366000	204000	216000	362000	0.0125	0.808	1.07	0.102	insig
MEDP1870	Ile-Lys	Amino acid and Its metabolites	Small Peptide	C12H25N3O3	2	-	329000	138000	146000	318000	202000	211000	142000	194000	175000	148000	196000	190000	0.767	0.206	1.29	0.363	insig
MEDP2387	Ile-Ser	Amino acid and Its metabolites	Small Peptide	C9H18N2O4	2	6403-14-1	733000	311000	563000	861000	457000	591000	501000	678000	839000	545000	672000	590000	0.389	0.595	0.919	-0.122	insig
MEDP2395*142	Ile-Thr	Amino acid and Its metabolites	Small Peptide	C10H20N2O4	2	59652-61-8	641000	410000	499000	1030000	600000	855000	606000	899000	846000	462000	547000	790000	0.0968	0.878	0.973	-0.0397	insig
MEDN1991	Ile-Val	Amino acid and Its metabolites	Small Peptide	C11H22N2O3	2	41017-96-3	25100	23500	11300	51000	29200	15100	15600	22300	16200	9910	20800	23500	0.675	0.244	1.43	0.518	insig
MEDP0425	Imidazoleacetic acid	Heterocyclic compounds	Indole and Its derivatives	C5H6N2O2	1	645-65-8	152000	180000	164000	173000	216000	184000	230000	272000	182000	197000	191000	16600	0.249	0.93	0.981	-0.0271	insig
MEDN1056	Iminodiacetic acid	Organic acid and Its derivatives	Organic acid and Its derivatives	C4H7NO4	1	142-73-4	992000	1520000	1930000	1590000	2310000	1930000	1710000	2320000	2080000	1710000	2240000	2030000	0.766	0.194	0.85	-0.234	insig
MEDP0453	Indole	Heterocyclic compounds	Indole and Its derivatives	C8H7N	1	120-72-9	5720000	4940000	5100000	5980000	5020000	5130000	5410000	6640000	5530000	5440000	6050000	5070000	0.755	0.222	0.934	-0.0991	insig
MEDN0562	Indole 3-carbinol	Heterocyclic compounds	Indole and Its derivatives	C9H9NO	1	700-06-1	5350000	5380000	5180000	5810000	6080000	5150000	6560000	5980000	5990000	5470000	5970000	5740000	1.11	0.0544	0.922	-0.117	insig
MEDP0529	Indole-3-acetamide	Heterocyclic compounds	Indole and Its derivatives	C10H10N2O	1	879-37-8	121000	125000	202000	181000	185000	169000	189000	229000	187000	188000	140000	189000	0.705	0.22	0.875	-0.193	insig
MEDP2686	Indole-3-glyoxal	Heterocyclic compounds	Indole and Its derivatives	C10H7NO2	2	7269-72-9	638000	518000	558000	630000	609000	582000	651000	535000	571000	594000	596000	532000	0.227	0.726	1.02	0.0232	insig
MEDN0523	Indole-3-lactic acid	Heterocyclic compounds	Indole and Its derivatives	C11H11NO3	1	1821-52-9	269000	204000	284000	288000	271000	308000	148000	155000	185000	234000	222000	228000	1.46	0.00533	1.39	0.47	up
MEDN0656	Indoleacetaldehyde	Heterocyclic compounds	Indole and Its derivatives	C10H9NO	1	2591-98-2	950000	1040000	1080000	1240000	1140000	1140000	1430000	1580000	1400000	1410000	1420000	1410000	1.71	7.58e-05	0.763	-0.39	down
MEDN1003	Inosine	Nucleotide and Its metabolites	Nucleotide and Its metabolites	C10H12N4O5	1	58-63-9	49700000	61100000	71200000	62500000	62400000	64800000	77900000	75500000	85500000	88500000	77100000	70500000	1.55	0.00143	0.783	-0.354	down
MEDP2506	Inosine 5'-monophosphate	Nucleotide and Its metabolites	Nucleotide and Its metabolites	C10H13N4O8P	1	131-99-7	363000	302000	400000	405000	394000	362000	360000	565000	491000	498000	515000	483000	1.38	0.00731	0.764	-0.388	down
MEDN1553	Inosine diphosphate	Nucleotide and Its metabolites	Nucleotide and Its metabolites	C10H14N4O11P2	2	81012-88-6	277000	310000	190000	180000	384000	224000	865000	810000	468000	401000	469000	397000	1.56	0.0144	0.459	-1.12	down
MEDP2266	Inositol 1,3,4-trisphosphate	Organic acid and Its derivatives	Phosphoric acids	C6H15O15P3	2	98102-63-7	4110000	4800000	4200000	3500000	4650000	3600000	6820000	7790000	6610000	5940000	5840000	5850000	1.76	0.000187	0.64	-0.644	down
MEDN2059	Inositol 1-phosphate	Alcohol and amines	Alcohols	C6H13O9P	2	573-35-3	5980000	1960000	1670000	8860000	4690000	1790000	14600000	10300000	9400000	5410000	3140000	8680000	1.11	0.0551	0.484	-1.05	insig
MEDN1621*036	Isocitric?acid	Organic acid and Its derivatives	Organic acid and Its derivatives	C6H8O7	2	320-77-4	2010000	285000	231000	1800000	650000	1050000	208000	609000	554000	316000	154000	324000	1.02	0.0937	2.78	1.48	insig
MEDP1469	Isoprenaline	Hormones and hormone related compounds	Hormones and hormone related compounds	C11H17NO3	1	7683-59-2	121000	113000	146000	150000	162000	124000	114000	177000	167000	217000	148000	156000	0.875	0.126	0.833	-0.264	insig
MEDN2292	Isopropyl 3-(3,4-dihydroxyphenyl)-2-hydroxypropanoate	Benzene and substituted derivatives	Benzene and substituted derivatives	C12H16O5	2	-	2040000	2580000	2520000	2230000	2940000	2050000	2100000	3060000	2400000	2510000	2520000	2410000	0.397	0.581	0.956	-0.0647	insig
MEDN2175	L-2-Aminoadipate	Organic acid and Its derivatives	Organic acid and Its derivatives	C6H11NO4	2	1118-90-7	23400	35500	37100	30100	48200	36500	10000	14200	22900	29900	18400	12400	1.45	0.00355	1.96	0.968	up
MEDN1235	L-2-amino-6-oximelic acid	Organic acid and Its derivatives	Organic acid and Its derivatives	C7H11NO5	2	75650-93-0	336000	418000	434000	449000	359000	404000	463000	861000	920000	849000	849000	729000	1.68	0.00199	0.513	-0.962	down
MEDP0013*102	L-Alanine	Amino acid and Its metabolites	Amino acids	C3H7NO2	2	56-41-7	968000	315000	453000	475000	746000	386000	280000	591000	701000	698000	738000	171000	0.162	0.852	1.05	0.0723	insig
MEDN1556*067	L-Allothreonine	Amino acid and Its metabolites	Amino acids	C4H9NO3	2	28954-12-3	121000	88100	93200	130000	110000	114000	104000	152000	124000	130000	153000	131000	1.06	0.0455	0.827	-0.275	down
MEDP0010	L-Arginine	Amino acid and Its metabolites	Amino acids	C6H14N4O2	1	74-79-3	5860000	5470000	5310000	6270000	6790000	5260000	6570000	6510000	6120000	5350000	5060000	5430000	0.0515	0.966	0.997	-0.00396	insig
MEDN0242	L-Ascorbate	CoEnzyme and vitamins	CoEnzyme and vitamins	C6H8O6	2	50-81-7	0	0	0	0	0	0	21200	17300	22900	23100	28400	18300	1.92	4.19e-05	0		down
MEDN1558	L-Ascorbyl 6-palmitate	Aldehyde,Ketones,Esters	Esters	C22H38O7	2	137-66-6	20400	21600	16200	21600	23000	12700	43000	34400	24700	31200	19200	18200	1.15	0.069	0.677	-0.562	insig
MEDP0049	L-Asparagine Anhydrous	Amino acid and Its metabolites	Amino acids	C4H8N2O3	1	70-47-3	538000	398000	537000	389000	577000	562000	484000	235000	597000	439000	507000	566000	0.38	0.657	1.06	0.0857	insig
MEDN0009	L-Aspartic Acid	Amino acid and Its metabolites	Amino acids	C4H7NO4	2	56-84-8	1980000	1570000	1930000	2300000	2060000	1920000	1410000	2180000	1940000	2050000	2140000	2080000	0.0703	0.961	0.996	-0.00558	insig
MEDP0015	L-Citrulline	Amino acid and Its metabolites	Amino acids	C6H13N3O3	1	372-75-8	16100	20900	21800	38500	83500	52200	1480000	1600000	2090000	1530000	1780000	1350000	1.87	2.18e-05	0.0237	-5.4	down
MEDN2064	L-Cysteic acid	Organic acid and Its derivatives	Organic acid and Its derivatives	C3H7NO5S	2	498-40-8	104000	81100	73500	134000	98400	68300	64200	200000	141000	101000	153000	70800	0.608	0.267	0.766	-0.384	insig
MEDP0052	L-Cysteine	Amino acid and Its metabolites	Amino acids	C3H7NO2S	1	52-90-4	1300000	1170000	1150000	1470000	1390000	1220000	1470000	1390000	1360000	1050000	1340000	1390000	0.306	0.552	0.963	-0.054	insig
MEDP0321	L-Dihydroorotic Acid	Organic acid and Its derivatives	Organic acid and Its derivatives	C5H6N2O4	1	5988-19-2	33200000	29700000	28400000	41100000	26600000	27800000	48600000	29100000	35500000	14300000	25600000	45400000	0.0354	0.743	0.941	-0.0873	insig
MEDP0016	L-Glutamic Acid	Amino acid and Its metabolites	Amino acids	C5H9NO4	1	56-86-0	17400000	18500000	18200000	20800000	22300000	18900000	14700000	25200000	20300000	19400000	22500000	20200000	0.284	0.539	0.949	-0.0751	insig
MEDN0046	L-Glutamine	Amino acid and Its metabolites	Amino acids	C5H10N2O3	1	56-85-9	335000	321000	405000	541000	335000	397000	252000	585000	448000	374000	352000	466000	0.141	0.686	0.942	-0.0862	insig
MEDN0240	L-Gulonolactone	Carbohydrates and Its metabolites	Sugar acids	C6H10O6	1	1128-23-0	74600	37100	37300	70200	48900	82000	72600	50800	51400	63500	48500	57500	0.0308	0.916	1.02	0.0242	insig
MEDN1897*032	L-Gulose	Carbohydrates and Its metabolites	Carbohydrates and Its metabolites	C6H12O6	2	6027-89-0	356000	318000	344000	473000	256000	456000	311000	507000	450000	514000	388000	279000	0.443	0.457	0.9	-0.152	insig
MEDP0017	L-Histidine	Amino acid and Its metabolites	Amino acids	C6H9N3O2	1	71-00-1	2160000	2820000	2880000	3090000	3030000	2920000	3030000	3980000	3440000	3460000	3760000	3300000	1.38	0.00577	0.806	-0.311	down
MEDP0387	L-Homoarginine	Amino acid and Its metabolites	Amino acids	C7H16N4O2	1	156-86-5	5140	4700	7740	13600	6960	4640	1790	13400	11400	1810	23400	6650	0.0347	0.494	0.73	-0.454	insig
MEDN0328*067	L-Homoserine	Organic acid and Its derivatives	Organic acid and Its derivatives	C4H9NO3	1	672-15-1	121000	88100	93200	130000	110000	114000	104000	152000	124000	130000	153000	131000	1.06	0.0455	0.827	-0.275	down
MEDP1144*115	L-Isoleucine	Amino acid and Its metabolites	Amino acids	C6H13NO2	1	73-32-5	608000	452000	688000	565000	598000	469000	656000	1110000	879000	869000	1050000	923000	1.59	0.00152	0.617	-0.697	down
MEDN0325	L-Lactic Acid	Organic acid and Its derivatives	Organic acid and Its derivatives	C3H6O3	1	79-33-4	723000	913000	717000	963000	550000	446000	397000	596000	625000	603000	660000	560000	0.759	0.151	1.25	0.326	insig
MEDP0011	L-Lysine	Amino acid and Its metabolites	Amino acids	C6H14N2O2	1	56-87-1	4350000	4130000	4100000	3920000	3990000	4650000	4610000	4330000	4150000	4420000	4910000	3810000	0.56	0.366	0.959	-0.0608	insig
MEDP0020	L-Methionine	Amino acid and Its metabolites	Amino acids	C5H11NO2S	1	63-68-3	8620000	9550000	11300000	12000000	11500000	13700000	10400000	13600000	15800000	13900000	15200000	14000000	1.13	0.0286	0.803	-0.316	down
MEDP2322	L-NIO-hydrochloride	Amino acid and Its metabolites	Amino acid derivatives	C7H15N3O2	1	36889-13-1	405000	381000	411000	235000	301000	351000	306000	544000	425000	395000	307000	374000	0.603	0.351	0.886	-0.175	insig
MEDP0519*114	L-Norleucine	Amino acid and Its metabolites	Amino acids	C6H13NO2	2	327-57-1	95200000	158000000	171000000	56200000	188000000	173000000	205000000	255000000	82500000	226000000	230000000	74200000	0.458	0.35	0.785	-0.349	insig
MEDP1778*110	L-Norvaline	Amino acid and Its metabolites	Amino acids	C5H11NO2	1	6600-40-4	12800000	14600000	15300000	14900000	15900000	15200000	18200000	20400000	19000000	18700000	18000000	19000000	1.75	2.48e-05	0.782	-0.354	down
MEDP0012	L-Ornithine	Amino acid and Its metabolites	Amino acids	C5H13ClN2O2	1	3184-13-2	59300	28200	21000	40100	24400	35900	140000	104000	156000	140000	150000	91400	1.78	6.12e-05	0.267	-1.9	down
MEDP0021	L-Phenylalanine	Amino acid and Its metabolites	Amino acids	C9H11NO2	1	63-91-2	316000000	339000000	355000000	393000000	348000000	353000000	396000000	452000000	439000000	403000000	416000000	381000000	1.56	0.00165	0.845	-0.242	down
MEDP0022*108	L-Proline	Amino acid and Its metabolites	Amino acids	C5H9NO2	1	147-85-3	11400000	14300000	14200000	14300000	16300000	14200000	11800000	14800000	14000000	13600000	15000000	13700000	0.239	0.686	1.02	0.0341	insig
MEDN0232*027	L-Rhamnose	Carbohydrates and Its metabolites	Sugars	C6H12O5	1	3615-41-6	5090	23500	13900	11700	17400	6580	41000	25600	24500	25400	13400	6440	0.922	0.122	0.574	-0.801	insig
MEDP0058	L-Saccharopine	Amino acid and Its metabolites	Amino acids	C11H20N2O6	2	997-68-2	47400	84000	78600	73600	128000	84500	207000	58800	80000	68400	97500	89700	0.374	0.5	0.826	-0.276	insig
MEDN0018	L-Serine	Amino acid and Its metabolites	Amino acids	C3H7NO3	1	56-45-1	213000	404000	349000	292000	387000	243000	310000	404000	333000	394000	360000	307000	0.704	0.341	0.896	-0.159	insig
MEDN0326	L-Tartaric Acid	Organic acid and Its derivatives	Organic acid and Its derivatives	C4H6O6	2	87-69-4	6090	6270	4640	18400	20500	9240	13700	8660	5330	10500	9240	10400	0.0472	0.698	1.13	0.172	insig
MEDN0050	L-Theanine	Amino acid and Its metabolites	Amino acids	C7H14N2O3	2	3081-61-6	236000	195000	172000	259000	230000	210000	229000	256000	195000	182000	206000	209000	0.146	0.823	1.02	0.0257	insig
MEDN0005*067	L-Threonine	Amino acid and Its metabolites	Amino acids	C4H9NO3	1	72-19-5	121000	88100	93200	130000	110000	114000	104000	152000	124000	130000	153000	131000	1.06	0.0455	0.827	-0.275	down
MEDN0019	L-Tryptophan	Amino acid and Its metabolites	Amino acids	C11H12N2O2	1	73-22-3	239000	286000	299000	349000	339000	326000	299000	449000	428000	425000	358000	384000	1.27	0.0151	0.785	-0.35	down
MEDP0891	L-Tryptophanamide	Amino acid and Its metabolites	Amino acid derivatives	C11H13N3O	2	20696-57-5	148000	129000	144000	126000	167000	142000	182000	149000	168000	177000	151000	159000	1.25	0.0242	0.868	-0.204	down
MEDP0009*130	L-Tyrosine	Amino acid and Its metabolites	Amino acids	C9H11NO3	1	60-18-4	39900000	49600000	56700000	57200000	54800000	55300000	54400000	64900000	69900000	60900000	68400000	73500000	1.31	0.00724	0.8	-0.323	down
MEDP0664	L-Tyrosine methyl ester	Amino acid and Its metabolites	Amino acid derivatives	C10H13NO3	2	1080-06-4	381000	410000	362000	493000	427000	448000	402000	414000	485000	361000	357000	414000	0.351	0.594	1.04	0.052	insig
MEDP0026*110	L-Valine	Amino acid and Its metabolites	Amino acids	C5H11NO2	1	72-18-4	12800000	14600000	15300000	14900000	15900000	15200000	18200000	20400000	19000000	18700000	18000000	19000000	1.75	2.48e-05	0.782	-0.354	down
MEDP0318	L-kynurenine	Amino acid and Its metabolites	Amino acid derivatives	C10H12N2O3	1	343-65-7	39500	51100	51100	66800	52500	36400	30800	52300	46500	37500	61500	31200	0.558	0.372	1.14	0.195	insig
MEDN1931*020	L-lyxose	Carbohydrates and Its metabolites	Carbohydrates and Its metabolites	C5H10O5	2	1949-78-6	111000	94500	58700	93200	126000	86300	136000	138000	105000	107000	35700	120000	0.171	0.525	0.889	-0.17	insig
MEDP2690	LPA(20:0/0:0)	GP	LPA	C23H47O7P	2	-	37800	25400	23100	21400	24900	22100	36800	54800	46100	52500	42900	34200	1.64	0.00145	0.579	-0.789	down
MEDP0336	LPC(0:0/14:0)	GP	LPC	C22H46NO7P	1	-	2170000	1660000	1820000	2000000	1920000	1790000	1420000	1600000	1370000	1410000	1420000	1290000	1.7	0.000516	1.33	0.416	up
MEDP1692	LPC(0:0/15:0)	GP	LPC	C23H48NO7P	1	108273-89-8	1330000	1250000	1570000	1600000	1510000	1600000	1540000	1540000	1240000	1310000	1380000	1160000	0.721	0.232	1.08	0.114	insig
MEDP1346	LPC(0:0/16:0)	GP	LPC	C24H50NO7P	1	-	690000	476000	521000	575000	527000	546000	676000	861000	698000	770000	674000	652000	1.5	0.00375	0.77	-0.377	down
MEDP1699	LPC(0:0/16:1)	GP	LPC	C24H48NO7P	1	-	4520000	3130000	3860000	3420000	6170000	3460000	4660000	4670000	4490000	3770000	4060000	6540000	0.613	0.342	0.871	-0.199	insig
MEDP2831	LPC(0:0/17:0)	GP	LPC	C25H52NO7P	2	-	334000	220000	240000	293000	291000	298000	381000	396000	421000	434000	316000	355000	1.5	0.00175	0.728	-0.458	down
MEDP1700	LPC(0:0/18:0)	GP	LPC	C26H54NO7P	1	-	195000	134000	161000	144000	177000	162000	214000	328000	268000	263000	205000	199000	1.56	0.00704	0.659	-0.601	down
MEDP1701	LPC(0:0/18:1)	GP	LPC	C26H52NO7P	1	-	172000	258000	153000	184000	163000	167000	242000	300000	261000	268000	230000	207000	1.49	0.00783	0.728	-0.458	down
MEDP0495	LPC(0:0/18:2)	GP	LPC	C26H50NO7P	1	-	55000	27700	50500	65700	56100	60400	58500	67800	56800	73500	51500	52300	0.602	0.278	0.875	-0.193	insig
MEDP1343	LPC(0:0/18:3)	GP	LPC	C26H48NO7P	1	-	450000	318000	327000	352000	367000	409000	464000	516000	394000	489000	481000	471000	1.41	0.00431	0.789	-0.341	down
MEDP2832	LPC(0:0/19:0)	GP	LPC	C27H56NO7P	2	-	39200000	33500000	36200000	38500000	36200000	36600000	56000000	65000000	74300000	65300000	52100000	48800000	1.78	0.00152	0.609	-0.715	down
MEDP1702	LPC(0:0/20:1)	GP	LPC	C28H56NO7P	1	-	135000	85200	90100	88100	91100	98500	153000	212000	181000	212000	169000	129000	1.69	0.00101	0.557	-0.844	down
MEDP1330	LPC(0:0/20:2)	GP	LPC	C28H54NO7P	1	-	89600	53700	113000	123000	70300	45600	97100	115000	223000	225000	114000	100000	1.21	0.056	0.566	-0.82	insig
MEDP1331	LPC(0:0/20:3)	GP	LPC	C28H52NO7P	1	-	351000	315000	301000	300000	298000	341000	662000	704000	476000	459000	579000	460000	1.74	0.00251	0.571	-0.809	down
MEDP1333	LPC(0:0/20:4)	GP	LPC	C28H50NO7P	1	-	748000	685000	756000	736000	759000	651000	1180000	1040000	1230000	1040000	997000	1200000	1.82	5.73e-05	0.647	-0.627	down
MEDP1336	LPC(0:0/20:5)	GP	LPC	C28H48NO7P	2	-	363000	427000	361000	447000	401000	404000	659000	682000	564000	567000	585000	643000	1.8	1.49e-05	0.65	-0.623	down
MEDP1318	LPC(0:0/22:4)	GP	LPC	C30H54NO7P	1	-	274000	210000	229000	228000	246000	244000	298000	326000	322000	348000	334000	320000	1.75	2.34e-05	0.735	-0.444	down
MEDP1321	LPC(0:0/22:5)	GP	LPC	C30H52NO7P	1	-	530000	420000	459000	474000	510000	434000	701000	738000	692000	722000	682000	647000	1.83	2.13e-06	0.676	-0.564	down
MEDP2830	LPC(14:0/0:0)	GP	LPC	C22H46NO7P	2	20559-16-4	6150000	3920000	4600000	5280000	4610000	5010000	3650000	4670000	3750000	4060000	3950000	3550000	1.33	0.023	1.25	0.324	up
MEDP0494	LPC(15:0/0:0)	GP	LPC	C23H48NO7P	1	-	2350000	1690000	2040000	2280000	1810000	1970000	2040000	2700000	2240000	2880000	2480000	1960000	1.01	0.0827	0.849	-0.236	insig
MEDP0338	LPC(16:0/0:0)	GP	LPC	C24H50NO7P	1	17364-16-8	541000	340000	392000	368000	394000	385000	506000	663000	520000	549000	522000	429000	1.39	0.0128	0.759	-0.398	down
MEDP1348	LPC(16:1/0:0)	GP	LPC	C24H48NO7P	1	-	19400000	14100000	16200000	17100000	16400000	16300000	19900000	23000000	20100000	21700000	20200000	18200000	1.52	0.00224	0.808	-0.307	down
MEDP1902	LPC(16:2/0:0)	GP	LPC	C24H46NO7P	1	-	499000	381000	229000	221000	237000	152000	557000	224000	204000	230000	249000	199000	0.00732	0.906	1.03	0.0478	insig
MEDP0434	LPC(17:0/0:0)	GP	LPC	C25H52NO7P	1	50930-23-9	1080000	904000	1060000	1130000	1100000	1010000	1550000	1820000	1860000	1850000	1450000	1500000	1.8	0.00017	0.627	-0.673	down
MEDP2836	LPC(17:1/0:0)	GP	LPC	C25H50NO7P	2	-	1100000	814000	928000	873000	842000	982000	1460000	1870000	1320000	1740000	1290000	1230000	1.69	0.00212	0.622	-0.685	down
MEDP1337	LPC(18:0/0:0)	GP	LPC	C26H54NO7P	1	-	218000	154000	194000	158000	156000	175000	217000	328000	274000	276000	269000	184000	1.49	0.00853	0.682	-0.552	down
MEDP1339	LPC(18:1/0:0)	GP	LPC	C26H52NO7P	1	3542-29-8	177000	160000	170000	166000	159000	169000	245000	280000	270000	266000	222000	259000	1.85	5.36e-05	0.649	-0.624	down
MEDP1341	LPC(18:2/0:0)	GP	LPC	C26H50NO7P	1	-	83200	60800	67500	83200	64500	69200	46100	86000	72700	72300	69700	77200	0.167	0.914	1.01	0.0151	insig
MEDP1345	LPC(18:3/0:0)	GP	LPC	C26H48NO7P	1	-	476000	359000	318000	393000	368000	343000	527000	549000	483000	569000	486000	391000	1.49	0.00476	0.751	-0.414	down
MEDP2833	LPC(19:0/0:0)	GP	LPC	C27H56NO7P	2	-	65200000	50300000	50800000	47000000	52800000	57800000	72700000	76800000	66400000	70100000	58900000	58600000	1.42	0.00859	0.803	-0.317	down
MEDP2837	LPC(19:1/0:0)	GP	LPC	C27H54NO7P	2	-	467000	333000	378000	331000	104000	344000	418000	699000	566000	355000	360000	437000	0.963	0.0761	0.691	-0.534	insig
MEDP2745	LPC(19:2)	GP	LPC	C27H52NO7P	2	-	46200	28400	58600	70600	63300	27200	116000	67800	66400	65600	54400	60200	1.06	0.0833	0.684	-0.547	insig
MEDP1326	LPC(20:1/0:0)	GP	LPC	C28H56NO7P	1	-	398000	271000	278000	296000	247000	292000	397000	638000	550000	600000	498000	320000	1.54	0.00765	0.594	-0.753	down
MEDP1328	LPC(20:2/0:0)	GP	LPC	C28H54NO7P	1	-	89100	67900	67300	81200	53300	86500	119000	142000	118000	156000	142000	112000	1.7	0.000119	0.566	-0.822	down
MEDP1332	LPC(20:3/0:0)	GP	LPC	C28H52NO7P	1	-	208000	122000	132000	100000	95500	133000	240000	259000	188000	238000	268000	237000	1.62	0.000528	0.554	-0.853	down
MEDP1334	LPC(20:4/0:0)	GP	LPC	C28H50NO7P	1	-	729000	698000	699000	766000	688000	672000	1070000	913000	1190000	1010000	953000	1050000	1.81	0.000233	0.687	-0.542	down
MEDP1335	LPC(20:5/0:0)	GP	LPC	C28H48NO7P	2	-	460000	459000	487000	459000	365000	371000	627000	657000	592000	721000	673000	547000	1.73	0.000119	0.682	-0.553	down
MEDP2749	LPC(22:3)	GP	LPC	C30H56NO7P	2	-	106000	94600	66000	75900	54600	126000	112000	170000	165000	169000	170000	139000	1.53	0.00101	0.565	-0.824	down
MEDP1319	LPC(22:4/0:0)	GP	LPC	C30H54NO7P	1	-	368000	304000	395000	255000	305000	221000	399000	346000	352000	354000	597000	340000	1.06	0.0994	0.774	-0.37	insig
MEDP1322	LPC(22:5/0:0)	GP	LPC	C30H52NO7P	1	-	591000	420000	440000	492000	481000	400000	734000	670000	775000	745000	626000	587000	1.68	0.000353	0.683	-0.551	down
MEDP1325	LPC(22:6/0:0)	GP	LPC	C30H50NO7P	1	-	1280000	1030000	1150000	1530000	1460000	1470000	1720000	2190000	1680000	2020000	1630000	1490000	1.41	0.00694	0.738	-0.438	down
MEDN2234	LPC(24:5)	GP	LPC	C32H56NO7P	2	-	11000	4000	10600	12300	11600	11700	9470	7960	19200	19400	10600	10400	0.529	0.309	0.795	-0.332	insig
MEDP2876	LPC(24:6/0:0)	GP	LPC	C32H54NO7P	2	-	74600	72900	60600	73900	66300	55700	99400	102000	117000	122000	91600	98200	1.76	0.000123	0.641	-0.641	down
MEDP2761	LPC(24:6e)	GP	LPC	C32H54NO7P	2	-	66700	53800	65700	57100	53600	61300	90900	94200	103000	79600	85500	80400	1.77	0.000118	0.671	-0.577	down
MEDP2840	LPC(O-14:0)	GP	LPC-O	C22H48NO6P	2	-	369000	214000	280000	315000	253000	277000	255000	392000	289000	291000	279000	236000	0.125	0.861	0.981	-0.028	insig
MEDP1657	LPC(O-16:0)	GP	LPC-O	C24H52NO6P	1	52691-62-0	2920000	1520000	2170000	1820000	2030000	1900000	2180000	3930000	2770000	3670000	2930000	2170000	1.23	0.037	0.7	-0.515	down
MEDP1695	LPC(O-16:1)	GP	LPC-O	C24H50NO6P	1	97802-53-4	671000	438000	550000	517000	518000	507000	696000	1100000	879000	1020000	847000	652000	1.61	0.00391	0.616	-0.698	down
MEDP1658	LPC(O-18:1)	GP	LPC-O	C26H54NO6P	1	87907-66-2	1010000	569000	793000	770000	831000	703000	1130000	1840000	1490000	1700000	1280000	1030000	1.62	0.00319	0.553	-0.855	down
MEDP2746	LPC(O-18:3)	GP	LPC-O	C26H50NO6P	2	-	313000	189000	203000	202000	209000	194000	259000	491000	386000	416000	355000	227000	1.43	0.0173	0.614	-0.705	down
MEDP2842	LPC(O-20:0)	GP	LPC-O	C28H60NO6P	2	-	32900000	29400000	31000000	29300000	30600000	28500000	44000000	45200000	43100000	39400000	35300000	34000000	1.69	0.00267	0.755	-0.406	down
MEDP2846	LPC(O-20:2)	GP	LPC-O	C28H56NO6P	2	-	236000	177000	168000	211000	237000	170000	327000	393000	465000	354000	295000	282000	1.7	0.00157	0.567	-0.818	down
MEDP2847	LPC(O-22:2)	GP	LPC-O	C30H60NO6P	2	-	1020000	306000	955000	951000	910000	834000	1450000	1630000	2050000	1750000	1320000	1240000	1.38	0.00114	0.528	-0.92	down
MEDN2352	LPE(0:0/14:0)	GP	LPE	C19H40NO7P	2	-	184000	117000	137000	112000	150000	153000	105000	160000	104000	132000	144000	115000	0.656	0.295	1.12	0.169	insig
MEDP2789	LPE(0:0/15:0)	GP	LPE	C20H42NO7P	1	-	208000	131000	155000	119000	177000	167000	115000	248000	162000	196000	151000	141000	0.205	0.694	0.944	-0.0832	insig
MEDN1285	LPE(0:0/16:0)	GP	LPE	C21H44NO7P	1	-	5310000	2900000	3410000	3210000	3510000	3000000	3340000	4870000	3540000	3500000	3600000	3090000	0.24	0.826	0.973	-0.0401	insig
MEDN1287	LPE(0:0/16:1)	GP	LPE	C21H42NO7P	1	-	2490000	1620000	1720000	1780000	1920000	1900000	2300000	2860000	2330000	2220000	2280000	2010000	1.26	0.031	0.816	-0.293	down
MEDN1279	LPE(0:0/18:0)	GP	LPE	C23H48NO7P	1	-	18300000	11100000	12000000	9190000	12200000	8650000	10600000	22200000	12700000	15100000	15100000	10600000	0.718	0.302	0.828	-0.272	insig
MEDN2366	LPE(0:0/18:1)	GP	LPE	C23H46NO7P	2	-	4710000	3520000	2950000	4570000	3690000	3880000	4110000	5570000	4880000	5610000	7230000	3690000	1.13	0.059	0.75	-0.415	insig
MEDN1282	LPE(0:0/18:2)	GP	LPE	C23H44NO7P	1	-	929000	908000	1330000	781000	1080000	1060000	811000	813000	579000	647000	1150000	672000	1.11	0.0657	1.3	0.38	insig
MEDN2367	LPE(0:0/20:1)	GP	LPE	C25H50NO7P	2	-	156000	65800	78400	77100	82900	71400	84900	130000	76300	106000	109000	67700	0.379	0.686	0.927	-0.11	insig
MEDN1271	LPE(0:0/20:2)	GP	LPE	C25H48NO7P	1	-	65100	61000	51300	98800	101000	37400	94700	156000	126000	61800	54800	44800	0.565	0.353	0.771	-0.376	insig
MEDN1273	LPE(0:0/20:3)	GP	LPE	C25H46NO7P	1	-	117000	64100	1060000	250000	103000	207000	199000	111000	197000	447000	467000	146000	0.224	0.825	1.15	0.197	insig
MEDN2372	LPE(0:0/20:4)	GP	LPE	C25H44NO7P	1	-	8190000	6760000	6140000	4260000	4560000	5100000	5880000	7230000	7830000	6010000	5840000	9550000	0.846	0.184	0.827	-0.274	insig
MEDN1277	LPE(0:0/20:5)	GP	LPE	C25H42NO7P	1	-	507000	443000	585000	377000	391000	401000	575000	655000	569000	667000	600000	517000	1.49	0.00553	0.755	-0.406	down
MEDN1267	LPE(0:0/22:5)	GP	LPE	C27H46NO7P	1	-	1190000	2050000	3320000	1110000	1030000	2020000	1100000	1170000	2370000	1740000	1550000	3370000	0.129	0.853	0.949	-0.0753	insig
MEDN1269	LPE(0:0/22:6)	GP	LPE	C27H44NO7P	1	-	2000000	1890000	2740000	1770000	1480000	1990000	2220000	2410000	2350000	2030000	2220000	1960000	0.79	0.28	0.901	-0.151	insig
MEDN0368	LPE(14:0/0:0)	GP	LPE	C19H40NO7P	1	-	602000	338000	384000	354000	411000	394000	317000	530000	368000	405000	424000	300000	0.265	0.664	1.06	0.0836	insig
MEDN0366	LPE(16:0/0:0)	GP	LPE	C21H44NO7P	1	-	26300000	10800000	12700000	14900000	14700000	13100000	11900000	23000000	15400000	16200000	15300000	11500000	0.107	0.964	0.992	-0.0121	insig
MEDN2362	LPE(17:0/0:0)	GP	LPE	C22H46NO7P	2	-	1230000	619000	814000	646000	814000	720000	707000	1170000	796000	882000	903000	684000	0.342	0.684	0.943	-0.0848	insig
MEDN2365	LPE(17:1/0:0)	GP	LPE	C22H44NO7P	1	-	263000	228000	314000	230000	200000	198000	252000	273000	256000	231000	256000	226000	0.459	0.615	0.959	-0.0603	insig
MEDN0364	LPE(18:0/0:0)	GP	LPE	C23H48NO7P	1	-	16400000	10900000	12900000	11100000	11000000	9290000	9500000	22300000	13400000	17300000	12000000	10900000	0.615	0.327	0.838	-0.255	insig
MEDN0362	LPE(18:1/0:0)	GP	LPE	C23H46NO7P	1	-	5110000	4590000	3070000	3630000	3430000	3970000	4360000	5570000	5720000	8060000	4490000	4160000	1.18	0.0692	0.736	-0.443	insig
MEDN2369	LPE(18:2/0:0)	GP	LPE	C23H44NO7P	1	85046-18-0	1830000	1140000	1290000	1220000	1190000	1200000	1460000	1450000	1220000	1270000	1390000	1200000	0.23	0.848	0.983	-0.0253	insig
MEDN2363	LPE(20:0/0:0)	GP	LPE	C25H52NO7P	2	-	79900	37200	39100	63500	49600	38100	46900	35400	15700	49300	50600	34600	0.794	0.193	1.32	0.403	insig
MEDN2368	LPE(20:1/0:0)	GP	LPE	C25H50NO7P	2	-	160000	81700	89900	83000	84400	74000	83300	137000	91700	110000	104000	73000	0.291	0.797	0.957	-0.0628	insig
MEDN1272	LPE(20:2/0:0)	GP	LPE	C25H48NO7P	1	-	294000	84800	113000	71100	144000	103000	117000	157000	173000	139000	69000	110000	0.0772	0.842	1.06	0.0834	insig
MEDN1274	LPE(20:3/0:0)	GP	LPE	C25H46NO7P	1	-	511000	328000	417000	409000	350000	385000	591000	651000	625000	612000	696000	618000	1.73	6.01e-05	0.633	-0.66	down
MEDN1276	LPE(20:4/0:0)	GP	LPE	C25H44NO7P	1	-	2250000	2530000	2000000	3230000	1930000	2220000	4560000	3590000	4870000	3480000	4150000	3500000	1.69	0.000373	0.586	-0.771	down
MEDN1278	LPE(20:5/0:0)	GP	LPE	C25H42NO7P	1	-	229000	155000	147000	207000	156000	214000	338000	283000	357000	280000	262000	266000	1.63	0.000441	0.621	-0.688	down
MEDN1268	LPE(22:5/0:0)	GP	LPE	C27H46NO7P	1	-	766000	593000	786000	881000	765000	767000	953000	886000	880000	762000	583000	1150000	0.581	0.243	0.874	-0.194	insig
MEDP2748	LPE(O-17:1)	GP	LPE	C22H46NO6P	2	-	387000	206000	301000	200000	270000	243000	366000	695000	517000	633000	460000	318000	1.5	0.0104	0.538	-0.894	down
MEDN2286	LPE(O-18:1/0:0)	GP	LPE	C23H48NO6P	2	-	5500000	1760000	2560000	1830000	2560000	2700000	3230000	4670000	4680000	3090000	5000000	2650000	0.984	0.159	0.725	-0.464	insig
MEDN2284	LPE(O-18:2)	GP	LPE	C23H46NO6P	2	-	3910000	1570000	2520000	1760000	2470000	1920000	2400000	5170000	2750000	3820000	3090000	2320000	0.966	0.143	0.724	-0.466	insig
MEDP2849	LPE(P-16:0)	GP	LPE-P	C21H44NO6P	2	174062-72-7	24800000	12200000	17700000	12400000	14900000	12900000	15000000	30900000	19300000	26800000	21100000	14700000	0.965	0.131	0.743	-0.429	insig
MEDP2854	LPE(P-16:1)	GP	LPE-P	C21H42NO6P	2	-	52000	55000	58600	38900	50200	49200	88100	79000	67100	62900	69000	64500	1.61	0.0019	0.706	-0.502	down
MEDP2850	LPE(P-17:0)	GP	LPE-P	C22H46NO6P	2	-	511000	211000	297000	209000	311000	245000	393000	811000	556000	723000	444000	372000	1.4	0.0195	0.541	-0.886	down
MEDP2855	LPE(P-17:1)	GP	LPE-P	C22H44NO6P	2	-	102000	60800	95800	55700	88600	45400	84500	215000	127000	165000	76500	89700	1.17	0.0732	0.592	-0.756	insig
MEDP2851	LPE(P-18:0)	GP	LPE-P	C23H48NO6P	2	174062-73-8	5450000	2960000	3780000	3180000	3340000	2860000	4620000	10800000	8240000	8830000	6010000	4200000	1.48	0.0195	0.505	-0.986	down
MEDP2856	LPE(P-18:1)	GP	LPE-P	C23H46NO6P	2	-	3500000	1490000	1620000	1620000	2300000	1010000	2620000	6250000	3580000	5260000	3740000	2730000	1.44	0.0151	0.477	-1.07	down
MEDN2385	LPS(20:0)	GP	LPS	C26H52NO9P	2	-	74200	35600	35900	36500	28300	45700	63800	70700	50800	71200	74700	63100	1.36	0.017	0.65	-0.622	down
MEDP1776	Leu-Ala	Amino acid and Its metabolites	Small Peptide	C9H18N2O3	1	7298-84-2	1330000	402000	812000	1980000	1160000	1330000	1120000	1480000	1250000	788000	1040000	1360000	0.15	0.986	0.996	-0.00541	insig
MEDP2504*145	Leu-Asn	Amino acid and Its metabolites	Small Peptide	C10H19N3O4	1	14608-81-2	149000	53300	114000	257000	156000	144000	101000	184000	131000	102000	89500	194000	0.16	0.727	1.09	0.122	insig
MEDP2572	Leu-Asp	Amino acid and Its metabolites	Small Peptide	C10H18N2O5	1	32949-40-9	991000	313000	581000	1380000	840000	815000	756000	822000	757000	561000	640000	817000	0.174	0.563	1.13	0.177	insig
MEDP2393*151	Leu-Glu	Amino acid and Its metabolites	Small Peptide	C11H20N2O5	1	16364-31-1	2050000	501000	1240000	3180000	1830000	1960000	1410000	2080000	2230000	535000	1500000	2010000	0.164	0.72	1.1	0.139	insig
MEDP1294	Leu-Gly	Amino acid and Its metabolites	Small Peptide	C8H16N2O3	1	686-50-0	1050000	448000	1050000	1930000	1370000	993000	1130000	1580000	1570000	1020000	455000	1230000	0.0452	0.927	0.979	-0.031	insig
MEDP2307*144	Leu-Leu	Amino acid and Its metabolites	Small Peptide	C12H24N2O3	2	3303-31-9	303000	99300	226000	669000	315000	336000	219000	448000	366000	204000	216000	362000	0.0125	0.808	1.07	0.102	insig
MEDP2442	Leu-Met	Amino acid and Its metabolites	Small Peptide	C11H22N2O3S	2	36077-39-1	25300	16600	27700	38100	25300	36400	20000	23300	26700	17400	16600	23300	1.03	0.09	1.33	0.415	insig
MEDP2396*142	Leu-Thr	Amino acid and Its metabolites	Small Peptide	C10H20N2O4	2	-	641000	410000	499000	1030000	600000	855000	606000	899000	846000	462000	547000	790000	0.0968	0.878	0.973	-0.0397	insig
MEDP1506	Leu-Val	Amino acid and Its metabolites	Small Peptide	C11H22N2O3	2	13588-95-9	151000	19400	62100	245000	149000	121000	127000	109000	125000	78400	80900	168000	0.129	0.784	1.09	0.12	insig
MEDN2302	Licochalcone B	Benzene and substituted derivatives	Benzene and substituted derivatives	C16H14O5	2	58749-23-8	285000	273000	246000	299000	275000	271000	323000	304000	308000	270000	311000	296000	1.22	0.0242	0.91	-0.136	down
MEDP2806	Linoleamide	Alcohol and amines	Amines	C18H33NO	2	767000	27600	47500	40400	15800	47900	43500	29700	44900	27700	38300	33700	32700	0.0333	0.665	1.08	0.106	insig
MEDP0890	Lumichrome	Heterocyclic compounds	Heterocyclic compounds	C12H10N4O2	1	1086-80-2	7090000	6780000	7740000	8700000	7610000	7570000	11300000	12800000	11100000	12500000	11800000	10800000	1.82	3.18e-06	0.648	-0.625	down
MEDP2549*136	Lys-Ala	Amino acid and Its metabolites	Small Peptide	C9H19N3O3	2	17043-71-9	218000	240000	322000	253000	279000	242000	219000	269000	208000	191000	202000	212000	1.15	0.0497	1.19	0.256	up
MEDP2545*134	Lys-Gly	Amino acid and Its metabolites	Small Peptide	C8H17N3O3	2	2070000	233000	263000	283000	255000	269000	223000	273000	138000	171000	251000	315000	267000	0.524	0.541	1.08	0.11	insig
MEDP2376	Lys-Leu	Amino acid and Its metabolites	Small Peptide	C12H25N3O3	2	7369-79-1	173000	64300	193000	243000	126000	185000	142000	84000	216000	137000	126000	164000	0.288	0.55	1.13	0.179	insig
MEDP2380	Lys-Met	Amino acid and Its metabolites	Small Peptide	C11H23N3O3S	2	97729-52-7	1270000	1000000	1130000	1230000	1090000	916000	870000	1380000	1080000	846000	994000	1080000	0.448	0.523	1.06	0.0857	insig
MEDP2596	Lys-Phe	Amino acid and Its metabolites	Small Peptide	C15H23N3O3	2	6235-35-4	85400	90600	77200	118000	125000	161000	155000	79300	117000	103000	96400	112000	0.035	0.958	0.992	-0.0117	insig
MEDP2310	Lys-Pro	Amino acid and Its metabolites	Small Peptide	C11H21N3O3	2	52766-27-5	68300	63700	59700	71900	146000	52000	61700	46900	42000	65500	34500	58100	1.04	0.137	1.5	0.58	insig
MEDP2318	Lys-Ser	Amino acid and Its metabolites	Small Peptide	C9H19N3O4	2	6665-19-6	108000	104000	133000	122000	77400	99800	105000	85500	106000	98700	79800	100000	0.635	0.247	1.12	0.16	insig
MEDN2123	Lys-Thr	Amino acid and Its metabolites	Small Peptide	C10H21N3O4	2	97791-84-9	15000	21300	31000	26100	27000	18300	45800	29900	43400	23200	27600	34200	1.2	0.036	0.679	-0.558	down
MEDP2605	Lys-Tyr	Amino acid and Its metabolites	Small Peptide	C15H23N3O4	2	35978-98-4	166000	212000	160000	233000	203000	210000	104000	224000	187000	163000	180000	138000	0.832	0.162	1.19	0.25	insig
MEDP2329	Lys-Val	Amino acid and Its metabolites	Small Peptide	C11H23N3O3	2	20556-11-0	46800	40200	23400	58100	56400	40300	15600	32900	22900	22100	37400	15000	1.32	0.0126	1.82	0.862	up
MEDP2791	MG(0:0/20:4/0:0)	GL	MG	C23H38O4	2	-	8750	5060	6640	2400	3520	4560	12300	10900	3790	14600	7180	5610	1.04	0.0808	0.569	-0.815	insig
MEDP1449*166	MG(0:0/22:6/0:0)	GL	MG	C25H38O4	2	-	10400	5600	10800	9210	6430	5030	13300	19300	17300	23900	16000	10500	1.57	0.00398	0.473	-1.08	down
MEDP2760	MG(0:0/i-18:0/0:0)	GL	MG	C21H42O4	2	57361-83-8	947000	896000	721000	930000	883000	698000	1290000	1120000	1230000	1070000	960000	939000	1.48	0.00611	0.768	-0.381	down
MEDP1317	MG(16:0/0:0/0:0)	GL	MG	C19H38O4	2	32899-41-5	393000	245000	292000	354000	299000	260000	456000	805000	582000	423000	547000	314000	1.43	0.0252	0.59	-0.762	down
MEDP1651	MG(18:1/0:0/0:0)	GL	MG	C21H40O4	1	111-03-5	19400	3860	3220	2700	4590	8960	13300	44100	13100	20700	24000	7470	1.33	0.0573	0.348	-1.52	insig
MEDP1455	MG(20:4/0:0/0:0)	GL	MG	C23H38O4	1	-	8750	5060	6640	2400	3520	4560	12300	10900	3790	14600	7180	5610	1.04	0.0808	0.569	-0.815	insig
MEDP1450*166	MG(22:6/0:0/0:0)	GL	MG	C25H38O4	2	-	10400	5600	10800	9210	6430	5030	13300	19300	17300	23900	16000	10500	1.57	0.00398	0.473	-1.08	down
MEDP0325	Maleic Acid	Organic acid and Its derivatives	Organic acid and Its derivatives	C4H4O4	1	110-16-7	434000	528000	523000	538000	794000	490000	391000	597000	560000	543000	514000	542000	0.246	0.661	1.05	0.0715	insig
MEDP1039*168	Maltotriose	Carbohydrates and Its metabolites	Sugars	C18H32O16	1	1109-28-0	57600	28200	83500	36800	38300	28100	49900	42000	60400	47800	60200	58200	0.693	0.442	0.856	-0.225	insig
MEDN1981	Mesaconic acid	Organic acid and Its derivatives	Organic acid and Its derivatives	C5H6O4	1	498-24-8	170000	154000	210000	209000	570000	262000	215000	661000	357000	258000	369000	154000	0.522	0.467	0.782	-0.355	insig
MEDN1950	Met-Asp	Amino acid and Its metabolites	Small Peptide	C9H16N2O5S	2	14595-65-4	155000	556000	552000	2280000	362000	154000	473000	306000	335000	284000	256000	328000	0.378	0.342	2.05	1.03	insig
MEDP2574	Met-Thr	Amino acid and Its metabolites	Small Peptide	C9H18N2O4S	2	40883-16-7	40400	19300	19100	38400	20000	19800	0	0	0	0	0	0	1.91	0.00156	#DIV/0!		up
MEDN1985	Met-Val	Amino acid and Its metabolites	Small Peptide	C10H20N2O3S	2	14486-13-6	13900	9870	10500	18700	14700	15200	14800	19800	13300	11900	16800	14700	0.447	0.447	0.909	-0.137	insig
MEDN0741	Methanesulfonic acid	Organic acid and Its derivatives	Sulfonic acids	CH4O3S	1	75-75-2	9090000	9620000	10000000	9560000	13500000	10700000	11400000	10300000	15600000	12600000	11500000	11900000	1.01	0.0978	0.854	-0.228	insig
MEDP1777	Methionine Sulfoxide	Amino acid and Its metabolites	Amino acid derivatives	C5H11NO3S	2	62697-73-8	229000	250000	115000	231000	148000	256000	424000	379000	194000	329000	257000	376000	1.21	0.0192	0.627	-0.673	down
MEDP0277	Methyl Indole-3-Acetate	Heterocyclic compounds	Indole and Its derivatives	C11H11NO2	1	1912-33-0	69300	69900	60800	73800	73000	81100	85000	57300	63900	71400	132000	117000	0.576	0.245	0.812	-0.3	insig
MEDP2626	Methyl caffeate	Benzene and substituted derivatives	Benzene and substituted derivatives	C10H10O4	2	3843-74-1	211000	181000	173000	215000	237000	256000	194000	181000	187000	188000	209000	199000	0.813	0.214	1.1	0.135	insig
MEDP0685	Methylcysteine	Amino acid and Its metabolites	Amino acids	C4H9NO2S	1	1187-84-4	15200000	4640000	10000000	10500000	8530000	8200000	4290000	2060000	1710000	1420000	1780000	1580000	1.74	0.00255	4.44	2.15	up
MEDP1703	Methyldopa	Amino acid and Its metabolites	Amino acid derivatives	C10H13NO4	2	555-30-6	155000	79900	94300	53500	197000	47200	81300	108000	80200	93400	163000	157000	0.381	0.749	0.917	-0.125	insig
MEDP1491	Methylguanidine	Alcohol and amines	Amines	C2H8ClN3	2	21770-81-0	93200	95600	82000	98500	74800	102000	86400	129000	127000	91100	204000	72500	0.756	0.223	0.769	-0.379	insig
MEDN0335*066	Methylmalonic Acid	Organic acid and Its derivatives	Organic acid and Its derivatives	C4H6O4	2	516-05-2	5950000	6120000	6250000	9010000	7610000	7470000	5250000	9640000	8490000	7640000	8410000	6830000	0.405	0.439	0.917	-0.125	insig
MEDN0748*021	Methylparaben	Benzene and substituted derivatives	Phenolic acids	C8H8O3	2	99-76-3	31000	25200	17500	29900	27700	20500	18800	38100	29500	30200	27200	27000	0.528	0.367	0.889	-0.17	insig
MEDN1160	Mevalonate 5-phosphate	Organic acid and Its derivatives	Phosphoric acids	C6H13O7P	2	73566-35-5	173000	320000	311000	240000	290000	191000	304000	171000	213000	283000	240000	189000	0.276	0.549	1.09	0.123	insig
MEDN1562	Monobutyl phthalate	Aldehyde,Ketones,Esters	Esters	C12H14O4	1	131-70-4	4220000	3810000	3780000	3960000	4110000	3610000	4620000	4330000	4200000	3990000	4230000	4370000	1.32	0.0138	0.912	-0.132	down
MEDN1183	Multifidol	Benzene and substituted derivatives	Phenolics	C11H14O4	2	125074-06-8	196000	310000	260000	262000	365000	269000	251000	360000	434000	317000	320000	263000	0.786	0.22	0.855	-0.226	insig
MEDP1360	Mycosporine-glycine	Amino acid and Its metabolites	Amino acid derivatives	C10H15NO6	1	65318-21-0	870000	746000	894000	788000	869000	946000	650000	1070000	971000	870000	854000	940000	0.253	0.554	0.955	-0.0667	insig
MEDP0326	N'-Formylkynurenine	Amino acid and Its metabolites	Amino acid derivatives	C11H12N2O4	1	1022-31-7	103000	82100	149000	141000	79400	129000	48500	62200	62800	61100	71500	67700	1.63	0.00745	1.83	0.872	up
MEDP1472	N'-Methyl-2-pyridone-5-carboxamide	Heterocyclic compounds	Pteridines and derivatives	C7H8N2O2	1	701-44-0	93100	84500	96100	89700	64400	100000	53000	90700	95600	120000	65600	95600	0.187	0.917	1.01	0.0198	insig
MEDP1913	N(Alpha)-Acetyl-Epsilon-(2-Propenal)Lysine	Amino acid and Its metabolites	Small Peptide	C11H18N2O4	2	99124-74-0	117000	129000	135000	118000	127000	153000	91600	105000	115000	135000	122000	108000	1.08	0.0675	1.15	0.201	insig
MEDP2143	N,N-Bis(2-hydroxyethyl)dodecanamide	FA	Others	C16H33NO3	1	120-40-1	94600	125000	39400	120000	95100	40600	103000	615000	143000	63500	36800	30400	0.298	0.429	0.519	-0.946	insig
MEDP1663	N,N-Dimethylarginine	Amino acid and Its metabolites	Amino acid derivatives	C8H18N4O2	2	30315-93-6	209000	556000	321000	206000	316000	337000	267000	182000	218000	278000	347000	293000	0.535	0.329	1.23	0.295	insig
MEDP0366	N,N-Dimethylformamide	Alcohol and amines	Amines	C3H7NO	1	25200	959000	1330000	1310000	1430000	1430000	1170000	1490000	1630000	1210000	1160000	1130000	1490000	0.392	0.498	0.941	-0.0875	insig
MEDP1052	N,N-diacetyl-O-methylhydroxylamine	Alcohol and amines	Polyamines	C5H9NO3	1	128459-09-6	790000	644000	733000	692000	657000	642000	748000	725000	793000	642000	842000	607000	0.467	0.468	0.955	-0.0671	insig
MEDN1125	N,N′-dicyclohexylcarbodiimide	Alcohol and amines	Polyamines	C13H22N2	2	538-75-0	18500000	14600000	12000000	17800000	15000000	19100000	16100000	16100000	18300000	17400000	15600000	15500000	0.212	0.806	0.981	-0.0275	insig
MEDP2758	N-(2-Hydroxyethyl)pentadecanamide	FA	Others	C17H35NO2	2	53832-58-9	623000	559000	551000	639000	557000	465000	762000	697000	659000	672000	589000	539000	1.12	0.0608	0.866	-0.207	insig
MEDP0212	N-Acetyl-5-Hydroxytryptamine	Tryptamines,Cholines,Pigments	Tryptamines	C12H14N2O2	1	1210-83-9	123000	138000	134000	145000	171000	153000	182000	158000	207000	122000	183000	116000	0.572	0.323	0.893	-0.164	insig
MEDP1494*137	N-Acetyl-D-Galactosamine	Alcohol and amines	Amines	C8H15NO6	2	1811-31-0	0	0	0	0	0	0	14300	17300	8170	6800	12100	3290	1.87	0.00454	0		down
MEDP0232*137	N-Acetyl-D-Glucosamine	Carbohydrates and Its metabolites	Sugar derivatives	C8H15NO6	2	7512-17-6	0	0	0	0	0	0	14300	17300	8170	6800	12100	3290	1.87	0.00454	0		down
MEDN2002	N-Acetyl-L-Glutamic Acid	Amino acid and Its metabolites	Amino acid derivatives	C7H11NO5	1	1188-37-0	336000	418000	434000	449000	359000	404000	463000	861000	920000	849000	849000	729000	1.68	0.00199	0.513	-0.962	down
MEDN0056	N-Acetyl-L-Leucine	Amino acid and Its metabolites	Amino acid derivatives	C8H15NO3	1	1188-21-2	44300	68900	63500	64400	69500	59300	72800	93000	95200	89600	80100	86900	1.56	0.000748	0.715	-0.484	down
MEDP0066	N-Acetyl-L-Tyrosine	Amino acid and Its metabolites	Amino acid derivatives	C11H13NO4	1	537-55-3	104000	113000	86400	119000	95600	90800	105000	103000	94000	97000	91700	95800	0.33	0.506	1.04	0.0579	insig
MEDN0586*010	N-Acetyl-L-alanine	Amino acid and Its metabolites	Amino acid derivatives	C5H9NO3	1	97-69-8	981000	1100000	1150000	564000	1320000	1170000	471000	607000	567000	545000	570000	406000	1.58	0.00366	1.99	0.991	up
MEDP2302	N-Acetyl-L-methionine	Amino acid and Its metabolites	Amino acid derivatives	C7H13NO3S	2	65-82-7	678000	741000	772000	805000	687000	891000	678000	603000	745000	628000	687000	683000	1.2	0.0425	1.14	0.184	up
MEDN0053	N-Acetylaspartate	Amino acid and Its metabolites	Amino acid derivatives	C6H9NO5	1	997-55-7	40000	47000	63400	50200	23600	48100	43100	77300	77800	55800	80300	50400	1.07	0.0543	0.708	-0.498	insig
MEDP1183	N-Acetylcadaverine	Alcohol and amines	Polyamines	C7H16N2O	2	32343-73-0	42400	64500	96700	109000	124000	80300	93500	73400	107000	99800	55700	118000	0.229	0.742	0.943	-0.0846	insig
MEDP0064	N-Acetylcysteine	Amino acid and Its metabolites	Amino acid derivatives	C5H9NO3S	1	616-91-1	78700	79900	56100	32300	50600	66900	93700	43500	54600	40800	83100	57900	0.0933	0.897	0.975	-0.036	insig
MEDN0506	N-Acetylglucosamine 1-Phosphate	Carbohydrates and Its metabolites	Phosphate sugars	C8H16NO9P	1	6866-69-9	1290000	1710000	1450000	1330000	1810000	1120000	1430000	959000	1030000	1190000	1210000	988000	1.15	0.0369	1.28	0.357	up
MEDP0373	N-Acetylglycine	Amino acid and Its metabolites	Amino acid derivatives	C4H7NO3	2	543-24-8	4210000	2300000	3280000	2700000	3880000	3280000	3250000	2840000	2520000	2790000	2970000	5700000	0.0961	0.906	0.98	-0.0297	insig
MEDP0067*137	N-Acetylmannosamine	Carbohydrates and Its metabolites	Sugars	C8H15NO6	1	3615-17-6	0	0	0	0	0	0	14300	17300	8170	6800	12100	3290	1.87	0.00454	0		down
MEDN0058	N-Acetylneuraminic Acid(SA)	Amino acid and Its metabolites	Amino acid derivatives	C11H19NO9	1	131-48-6	402000	323000	292000	761000	379000	542000	449000	517000	397000	287000	341000	430000	0.304	0.578	1.11	0.156	insig
MEDP0386	N-Acetylthreonine	Amino acid and Its metabolites	Amino acid derivatives	C6H11NO4	1	17093-74-2	67800	64800	65100	79100	60300	63400	67700	73000	90800	83500	56700	75800	0.765	0.196	0.895	-0.16	insig
MEDP0880	N-Alpha-Acetyl-L-Asparagine	Amino acid and Its metabolites	Amino acid derivatives	C6H10N2O4	1	4033-40-3	710000	823000	872000	607000	850000	883000	8920	8400	14300	8140	1680	10400	1.88	1.09e-05	91.6	6.52	up
MEDP0886	N-Amidino-L-Aspartate	Amino acid and Its metabolites	Amino acid derivatives	C5H9N3O4	2	6133-30-8	116000	124000	106000	123000	128000	108000	171000	251000	208000	200000	239000	223000	1.81	0.000215	0.546	-0.873	down
MEDP2346*104	N-Ethylglycine	Amino acid and Its metabolites	Amino acid derivatives	C4H9NO2	1	627-01-0	3760000	4490000	4050000	4820000	5240000	4680000	2800000	3480000	3420000	4030000	3750000	3490000	1.47	0.0048	1.29	0.367	up
MEDP1996	N-Formylglycine	Amino acid and Its metabolites	Amino acids	C3H5NO3	1	2491-15-8	4710000	3020000	3380000	3020000	3840000	2870000	3370000	1370000	2170000	2740000	3230000	2390000	1.1	0.0492	1.37	0.45	up
MEDN0837	N-Methyl-L-Glutamate	Amino acid and Its metabolites	Amino acid derivatives	C6H11NO4	2	35989-16-3	120000	141000	138000	98000	165000	137000	76000	79600	82200	96100	68800	84400	1.67	0.00142	1.64	0.714	up
MEDP0868*104	N-Methylalanine	Amino acid and Its metabolites	Amino acid derivatives	C4H9NO2	2	3913-67-5	3760000	4490000	4050000	4820000	5240000	4680000	2800000	3480000	3420000	4030000	3750000	3490000	1.47	0.0048	1.29	0.367	up
MEDP1915	N-Methylisoleucine	Amino acid and Its metabolites	Amino acids	C7H15NO2	2	-	33900	36500	28600	20300	22700	121000	0	0	0	0	0	0	1.89	0.0376	#DIV/0!		up
MEDN1861	N-Myristoylglycine	Amino acid and Its metabolites	Amino acid derivatives	C16H31NO3	2	14246-55-0	112000	118000	100000	106000	108000	111000	148000	125000	136000	119000	109000	108000	1.17	0.0701	0.881	-0.183	insig
MEDN0632	N-Oleoyl Glycine	Alcohol and amines	Amines	C20H37NO3	1	2601-90-3	22400	29900	23700	23000	26800	21200	36200	28500	27400	19300	25200	30400	0.695	0.242	0.88	-0.184	insig
MEDN1410	N-Palmitoylglycine	Amino acid and Its metabolites	Amino acid derivatives	C18H35NO3	2	2441-41-0	222000	427000	323000	77100	220000	209000	288000	224000	286000	284000	230000	236000	0.465	0.823	0.955	-0.0669	insig
MEDP0073	N-Phenylacetylglycine	Amino acid and Its metabolites	Amino acid derivatives	C10H11NO3	1	500-98-1	19100	21100	20700	13200	21200	12700	16800	31000	33200	16900	18200	19100	0.795	0.226	0.798	-0.325	insig
MEDN0062	N-Propionylglycine	Amino acid and Its metabolites	Amino acids	C5H9NO3	2	21709-90-0	295000	319000	329000	385000	408000	375000	356000	514000	536000	455000	452000	460000	1.4	0.00639	0.761	-0.394	down
MEDP2359	N-acetyl-D-Lactosamine	Carbohydrates and Its metabolites	Carbohydrates and Its metabolites	C14H25NO11	2	32181-59-2	47200	34800	49500	16100	48000	39100	13500	19700	25700	55800	15200	24300	0.924	0.133	1.52	0.605	insig
MEDN0818	N-acetyl-beta-alanine	Amino acid and Its metabolites	Amino acid derivatives	C5H9NO3	2	3025-95-4	981000	1100000	1150000	564000	1320000	1170000	471000	607000	567000	545000	570000	406000	1.58	0.00366	1.99	0.991	up
MEDN0827	N-acetylornithine	Amino acid and Its metabolites	Amino acid derivatives	C7H14N2O3	1	1570000	403000	577000	689000	549000	589000	636000	33900	36900	63700	52300	27500	38200	1.89	3.31e-05	13.6	3.77	up
MEDP1211	N-acetylpyrrolidine	Heterocyclic compounds	Heterocyclic compounds	C6H11NO	1	4030-18-6	26700	23700	33700	26300	54900	25300	33500	32500	59600	53900	44800	65200	1.14	0.0496	0.658	-0.603	down
MEDN0579	N-lactoyl-phenylalanine	Amino acid and Its metabolites	Amino acid derivatives	C12H15NO4	1	-	109000	142000	149000	158000	132000	138000	150000	167000	199000	200000	183000	178000	1.48	0.00257	0.769	-0.38	down
MEDP1786	N1,N8-diacetylspermidine	Alcohol and amines	Amines	C11H23N3O2	2	82414-35-5	77900	81800	56600	75300	30100	41400	39200	33700	106000	72100	65100	39900	0.0461	0.937	1.02	0.028	insig
MEDP2374	N1-Acetylspermidine	Alcohol and amines	Amines	C9H21N3O	2	34450-16-3	88800	112000	94700	74500	91200	55300	108000	116000	106000	105000	102000	123000	1.26	0.027	0.782	-0.355	down
MEDP1787	N4-Acetylcytidine	Nucleotide and Its metabolites	Nucleotide and Its metabolites	C11H15N3O6	1	3768-18-1	531000	626000	575000	475000	536000	534000	725000	471000	562000	802000	713000	547000	0.87	0.154	0.858	-0.222	insig
MEDP1662	N6,N6,N6-Trimethyl-L-lysine	Amino acid and Its metabolites	Amino acid derivatives	C9H20N2O2	1	-	240000	288000	309000	214000	94000	221000	217000	218000	166000	92500	248000	166000	0.47	0.29	1.23	0.302	insig
MEDP1954	N6-(2-Hydroxyethyl)adenosine	Nucleotide and Its metabolites	Nucleotide and Its metabolites	C12H17N5O5	1	4338-48-1	888000	1550000	1450000	1200000	1180000	1550000	1540000	1310000	1700000	2020000	2220000	1690000	1.2	0.0279	0.746	-0.422	down
MEDN0052	N6-Acetyl-L-Lysine	Amino acid and Its metabolites	Amino acid derivatives	C8H16N2O3	2	692-04-6	5610	23300	22300	43500	29400	38700	21400	21600	47300	21300	28300	34900	0.313	0.779	0.931	-0.103	insig
MEDP1991	N6-Isopentenyladenosine	Nucleotide and Its metabolites	Nucleotide and Its metabolites	C15H21N5O4	2	7724-76-7	156000	277000	262000	211000	222000	245000	283000	232000	342000	381000	434000	305000	1.31	0.0181	0.693	-0.528	down
MEDP0378	N6-Succinyl Adenosine	Nucleotide and Its metabolites	Nucleotide and Its metabolites	C14H17N5O8	1	4542-23-8	96200	88700	118000	91600	97800	83200	58500	21400	38800	51800	37800	56800	1.65	5.23e-05	2.17	1.12	up
MEDP1789	N6-methyl-2'-deoxyadenosine	Nucleotide and Its metabolites	Nucleotide and Its metabolites	C11H15N5O3	2	2002-35-9	52600	93500	92000	50500	119000	53700	61300	62700	41900	66800	89700	56100	0.506	0.331	1.22	0.285	insig
MEDP1493*155	N6-methyladenosine	Nucleotide and Its metabolites	Nucleotide and Its metabolites	C11H15N5O4	1	1867-73-8	935000	827000	966000	659000	798000	772000	670000	628000	757000	1300000	1070000	548000	0.109	0.982	0.996	-0.00531	insig
MEDP2757	Niclosamide	Others	Medicine	C13H8Cl2N2O4	2	50-65-7	109000	101000	105000	87800	110000	83200	119000	129000	116000	82500	118000	95700	0.727	0.232	0.901	-0.151	insig
MEDP0242	Nicotinamide	CoEnzyme and vitamins	CoEnzyme and vitamins	C6H6N2O	1	98-92-0	39100000	59200000	59300000	37200000	58000000	58500000	6970000	32400000	21200000	26800000	33600000	30900000	1.37	0.00127	2.05	1.04	up
MEDP1791	Nicotinamide riboside chloride	Nucleotide and Its metabolites	Nucleotide and Its metabolites	C11H15ClN2O5	2	23111-00-4	267000	243000	235000	399000	188000	457000	273000	155000	130000	78700	278000	203000	1.11	0.0679	1.6	0.677	insig
MEDP0246	Nicotinic Acid	CoEnzyme and vitamins	CoEnzyme and vitamins	C6H5NO2	1	59-67-6	26200000	59700000	66900000	87100000	67300000	74600000	89400000	106000000	107000000	89800000	85100000	79600000	1.16	0.0163	0.686	-0.545	down
MEDN0166	Nicotinic Acid Adenine Dinucleotide	Nucleotide and Its metabolites	Nucleotide and Its metabolites	C21H27N7O14P2	1	53-84-9	853000	292000	464000	336000	108000	176000	529000	207000	643000	953000	673000	901000	0.943	0.102	0.571	-0.809	insig
MEDN0180	Norepinephrine	Hormones and hormone related compounds	Hormones and hormone related compounds	C8H11NO3	2	51-41-2	110000	50000	79400	68800	90600	73100	68200	107000	26100	63300	64000	68600	0.629	0.375	1.19	0.249	insig
MEDN2265	Norethindrone acetate	Hormones and hormone related compounds	Hormones and hormone related compounds	C22H28O3	2	51-98-9	41900	3980	71400	52300	32900	33500	55200	23100	23900	38100	44800	19300	0.0363	0.64	1.15	0.208	insig
MEDN0806	Nα-Acetyl-L-glutamine	Amino acid and Its metabolites	Amino acid derivatives	C7H12N2O4	1	2490-97-3	18900	28300	18600	25300	27800	17700	23200	36900	32900	46300	50200	24900	1.29	0.0336	0.637	-0.651	down
MEDP2336	O-Acetyl-L-homoserine	Amino acid and Its metabolites	Amino acid derivatives	C6H11NO4	2	250736-84-6	63200	74900	61800	76000	82200	80900	19600	43700	18000	37200	50400	41500	1.59	0.000285	2.09	1.06	up
MEDN0616	O-Acetyl-L-serine	Amino acid and Its metabolites	Amino acid derivatives	C5H9NO4	2	5147-00-2	1500000	1640000	1610000	1430000	1460000	1560000	1760000	1710000	1530000	1600000	1580000	1460000	0.77	0.248	0.956	-0.0642	insig
MEDN0065	O-Phospho-L-Serine	Amino acid and Its metabolites	Amino acid derivatives	C3H8NO6P	1	407-41-0	71900	66000	63900	16600	63200	17000	58400	42700	62200	27000	56900	57300	0.347	0.935	0.98	-0.0287	insig
MEDN1944	O-Phospho-L-threonine	Amino acid and Its metabolites	Amino acid derivatives	C4H10NO6P	2	1114-81-4	634000	793000	1050000	629000	968000	635000	900000	1380000	1290000	1120000	1400000	1170000	1.49	0.00288	0.65	-0.621	down
MEDN0352*014	O-Phosphorylethanolamine	GP	Others	C2H8NO4P	1	1071-23-4	2690000	3180000	3260000	3190000	3380000	2890000	3490000	4960000	3810000	4480000	4060000	3630000	1.55	0.00605	0.761	-0.394	down
MEDN0834	O-Succinyl-L-Homoserine	Amino acid and Its metabolites	Amino acid derivatives	C8H13NO6	2	1492-23-5	3970	2600	3100	4840	2560	4200	5350	8650	4640	8960	6820	5760	1.5	0.0055	0.529	-0.918	down
MEDN1566	Octadecanedioic acid	Organic acid and Its derivatives	Organic acid and Its derivatives	C18H34O4	2	871-70-5	138000	89200	107000	216000	472000	238000	215000	682000	310000	141000	272000	125000	0.522	0.447	0.722	-0.469	insig
MEDP0574	Oleamide	Alcohol and amines	Amines	C18H35NO	1	301-02-0	181000	259000	173000	67200	228000	231000	257000	908000	335000	174000	465000	137000	0.941	0.167	0.5	-0.999	insig
MEDN0244	Orotic Acid	CoEnzyme and vitamins	CoEnzyme and vitamins	C5H4N2O4	2	65-86-1	289000	273000	232000	222000	385000	260000	704000	951000	924000	468000	502000	670000	1.73	0.00286	0.394	-1.35	down
MEDN0704	Oxaloacetic acid	Organic acid and Its derivatives	Organic acid and Its derivatives	C4H4O5	2	328-42-7	86400	69400	75000	83400	91200	71700	98500	106000	83200	75100	66200	87100	0.503	0.377	0.924	-0.114	insig
MEDP1083	Oxypurinol	Nucleotide and Its metabolites	Nucleotide and Its metabolites	C5H4N4O2	1	2465-59-0	851000	1230000	964000	1200000	1200000	1190000	1230000	841000	1140000	1350000	1430000	830000	0.102	0.812	0.973	-0.0388	insig
MEDP0101	P-Coumaric Acid	Benzene and substituted derivatives	Phenolic acids	C9H8O3	1	501-98-4	5790000	5670000	6840000	7810000	7010000	6980000	5970000	8150000	9190000	7940000	8630000	9500000	1.1	0.0334	0.812	-0.301	down
MEDN1145	P-chlorophenylalanine	Benzene and substituted derivatives	Phenolic acids	C9H10ClNO2	1	7424-00-2	3220000	2820000	3230000	3130000	2840000	2800000	3320000	3240000	3550000	2850000	3280000	3190000	0.981	0.0931	0.928	-0.108	insig
MEDN2224	PA(18:1(9Z)/18:1(9Z))	GP	PA	C39H73O8P	2	61617-08-1	15800	15100	12900	16600	20400	17100	18200	15600	17700	16600	15900	16200	0.259	0.742	0.977	-0.0331	insig
MEDP2765	PAF C-18:1	GP	LPC	C28H56NO7P	2	85966-90-1	201000	117000	124000	136000	136000	135000	294000	424000	489000	296000	227000	190000	1.63	0.0113	0.442	-1.18	down
MEDP1166	PC(16:0/2:0)	GP	PC	C26H52NO8P	1	-	181000	347000	253000	213000	137000	215000	285000	354000	305000	262000	241000	89900	0.35	0.515	0.876	-0.192	insig
MEDP2786	PC(2:0/16:0)	GP	PC	C26H52NO8P	2	-	122000	360000	197000	192000	149000	246000	344000	531000	465000	270000	227000	127000	0.916	0.139	0.644	-0.634	insig
MEDN2235	PC(34:2)	GP	PC	C42H80NO8P	2	-	2560000	4900000	4140000	1820000	1060000	1160000	924000	313000	157000	127000	155000	201000	1.64	0.0161	8.33	3.06	up
MEDP2792	PC(O-1:0/O-16:0)	GP	PC-O	C25H54NO6P	1	-	62500000	34600000	48200000	56300000	54800000	55000000	66900000	80900000	66100000	74100000	69700000	55200000	1.29	0.00959	0.755	-0.406	down
MEDP2708	PE-NMe(16:1(9Z)/18:1(11Z))	FA	Others	C40H76NO8P	2	-	36700	43400	43000	38300	39400	40300	51000	57600	53300	66000	59200	51300	1.76	0.000421	0.713	-0.488	down
MEDN2266	PI(15:0/2:0)	GP	PI	C26H49O13P	2	-	326000	374000	259000	340000	252000	246000	306000	276000	207000	172000	359000	295000	0.536	0.419	1.11	0.153	insig
MEDN2262	PS(22:0)	GP	PS	C28H54NO10P	2	-	214000	82400	409000	635000	288000	564000	878000	1020000	485000	159000	622000	95300	0.345	0.34	0.672	-0.573	insig
MEDP1067	Palmitoyl-N-isopropylamide	Alcohol and amines	Amines	C19H39NO	2	189939-61-5	43800	40300	16600	24100	49400	42900	18800	47300	33600	29600	34700	50900	0.0185	0.957	1.01	0.0158	insig
MEDP1795	Palmitoylethanolamide（PEA）	Alcohol and amines	Amines	C18H37NO2	2	544-31-0	43200	28000	35500	29200	27100	34400	54800	60200	64300	74300	42300	39900	1.57	0.00592	0.588	-0.766	down
MEDN0442	Pantetheine	CoEnzyme and vitamins	CoEnzyme and vitamins	C11H22N2O4S	2	496-65-1	616000	231000	339000	407000	362000	482000	621000	593000	530000	393000	491000	680000	1.01	0.0604	0.737	-0.441	insig
MEDN0245	Pantothenate	CoEnzyme and vitamins	CoEnzyme and vitamins	C9H17NO5	1	79-83-4	15600000	17300000	19000000	19400000	17300000	16300000	13100000	18600000	17100000	17900000	17000000	16600000	0.465	0.459	1.05	0.0643	insig
MEDP2565	Phe-Ala	Amino acid and Its metabolites	Small Peptide	C12H16N2O3	2	3918-87-4	28900	74300	28500	50600	38600	76300	64600	56100	57900	46900	89800	44700	0.683	0.366	0.825	-0.277	insig
MEDP2413*161	Phe-Ala-Ser	Amino acid and Its metabolites	Small Peptide	C15H21N3O5	2	-	46400	36700	26500	47700	24400	30000	20600	19400	34900	46300	28700	44400	0.369	0.653	1.09	0.123	insig
MEDP2356	Phe-Asp	Amino acid and Its metabolites	Small Peptide	C13H16N2O5	1	22828-05-3	744000	647000	749000	1020000	939000	945000	1090000	1140000	1200000	834000	1080000	1100000	1.23	0.0141	0.782	-0.355	down
MEDP1667*158	Phe-Glu	Amino acid and Its metabolites	Small Peptide	C14H18N2O5	2	3617-45-6	3300000	2200000	2830000	3330000	2920000	3030000	2810000	3200000	2790000	2940000	2940000	2950000	0.0116	0.983	0.999	-0.00191	insig
MEDP2431	Phe-Gly	Amino acid and Its metabolites	Small Peptide	C11H14N2O3	1	721-90-4	5390000	3610000	4930000	6030000	6000000	6000000	5600000	5730000	6490000	5420000	5400000	5980000	0.545	0.33	0.923	-0.115	insig
MEDN2146	Phe-His	Amino acid and Its metabolites	Small Peptide	C15H18N4O3	2	16874-81-0	8120	17200	12500	8490	7170	11000	10500	10100	3270	5330	4750	9970	0.947	0.119	1.47	0.557	insig
MEDP2587	Phe-Hyp	Amino acid and Its metabolites	Amino acid derivatives	C14H18N2O4	1	90965-82-5	134000	25100	24200	37200	15700	37000	44400	35700	169000	33200	51200	41100	0.604	0.562	0.73	-0.453	insig
MEDP2588	Phe-Ile	Amino acid and Its metabolites	Small Peptide	C15H22N2O3	1	22951-94-6	60300	40400	40300	53900	72100	52800	12900	93500	66600	58500	51100	82500	0.0514	0.567	0.876	-0.191	insig
MEDP2584*153	Phe-Thr	Amino acid and Its metabolites	Small Peptide	C13H18N2O4	2	51352-44-4	279000	181000	233000	367000	243000	286000	235000	238000	320000	98600	292000	260000	0.446	0.563	1.1	0.138	insig
MEDP2451	Phe-Tyr	Amino acid and Its metabolites	Small Peptide	C18H20N2O4	1	17355-18-9	16800	11200	19700	28200	19600	18900	15500	19200	26100	28300	12000	18800	0.104	0.8	0.956	-0.065	insig
MEDP1512	Phe-Val	Amino acid and Its metabolites	Small Peptide	C14H20N2O3	2	-	78500	44300	57100	152000	96400	72900	66300	125000	120000	88100	87200	104000	0.584	0.425	0.847	-0.239	insig
MEDP2058	Phenethylamine	Alcohol and amines	Amines	C8H11N	1	64-04-0	350000	360000	359000	402000	400000	410000	410000	505000	411000	448000	487000	400000	1.33	0.0164	0.857	-0.222	down
MEDN0338*072	Phenyllactate(Pla)	Organic acid and Its derivatives	Organic acid and Its derivatives	C9H10O3	2	828-01-3	19100	18000	19800	18000	17200	19700	32200	22100	35500	21000	28000	19400	1.39	0.0335	0.706	-0.503	down
MEDN1597	Phosphatidylethanolamine lyso alkenyl 16:0	GP	LPE	C21H44NO6P	2	-	386000	207000	272000	203000	260000	214000	213000	402000	259000	305000	236000	202000	0.229	0.772	0.954	-0.0681	insig
MEDN1692	Phosphatidylethanolamine lyso alkenyl 18:3	GP	LPE	C23H44NO6P	2	-	261000	154000	217000	102000	213000	172000	137000	247000	319000	272000	288000	230000	0.89	0.0998	0.749	-0.417	insig
MEDP0881	Phosphocholine	Nucleotide and Its metabolites	Nucleotide and Its metabolites	C5H15NO4P+	1	107-73-3	209000	191000	189000	183000	395000	178000	162000	209000	278000	204000	124000	135000	0.559	0.375	1.21	0.274	insig
MEDN1005	Phosphoenolpyruvate	Organic acid and Its derivatives	Phosphoric acids	C3H5O6P	2	138-08-9	259000	245000	254000	242000	258000	339000	263000	142000	272000	327000	253000	267000	0.367	0.682	1.05	0.068	insig
MEDN1722	Piperic acid	Organic acid and Its derivatives	Organic acid and Its derivatives	C8H6O4	2	94-53-1	600000	508000	489000	583000	578000	564000	492000	552000	537000	499000	571000	529000	0.64	0.315	1.04	0.0625	insig
MEDP0456	Piperidine	Heterocyclic compounds	Heterocyclic compounds	C5H11N	2	110-89-4	3670000	3640000	3900000	4580000	4460000	3880000	5210000	6460000	5790000	5480000	6120000	5750000	1.74	2.97e-05	0.694	-0.528	down
MEDN1024	Piperidine acid	Organic acid and Its derivatives	Organic acid and Its derivatives	C6H11NO2	1	3105-95-1	107000	121000	107000	107000	132000	106000	99100	123000	135000	89100	131000	89900	0.155	0.831	1.02	0.0273	insig
MEDP1304	Piperidone	Heterocyclic compounds	Heterocyclic compounds	C9H15NO2	2	28200	70000	118000	99000	92400	177000	178000	127000	83000	146000	108000	97300	88800	0.28	0.525	1.13	0.174	insig
MEDN0622	Porphobilinogen	Organic acid and Its derivatives	Organic acid and Its derivatives	C10H14N2O4	2	487-90-1	3340000	3980000	3260000	3350000	3330000	3240000	3410000	3240000	3700000	3470000	3410000	3680000	0.391	0.617	0.98	-0.0291	insig
MEDP2730	Pov-pc	GP	PC	C29H56NO9P	2	121324-31-0	150000	176000	168000	230000	199000	194000	551000	592000	655000	437000	364000	351000	1.8	0.00157	0.379	-1.4	down
MEDP2357	Pro-Ala	Amino acid and Its metabolites	Small Peptide	C8H14N2O3	2	6422-36-2	193000	162000	187000	162000	170000	170000	194000	183000	163000	162000	99800	166000	0.522	0.409	1.08	0.109	insig
MEDP2555	Pro-Asn	Amino acid and Its metabolites	Small Peptide	C9H15N3O4	2	107856-82-6	51400	39000	62600	87000	80800	75100	27000	68600	42400	59500	71900	83900	0.501	0.545	1.12	0.164	insig
MEDN2113	Pro-Asp	Amino acid and Its metabolites	Small Peptide	C9H14N2O5	2	85227-98-1	50600	92800	90000	83800	103000	68700	28500	75500	103000	59700	80400	65600	0.585	0.343	1.19	0.245	insig
MEDP2358	Pro-Glu	Amino acid and Its metabolites	Small Peptide	C10H16N2O5	2	67644-00-2	93300	86100	84300	123000	57100	80000	55500	100000	69200	59500	99800	125000	0.232	0.867	1.03	0.041	insig
MEDP2425	Pro-Leu	Amino acid and Its metabolites	Small Peptide	C11H20N2O3	2	52899-07-7	442000	549000	623000	769000	646000	647000	376000	549000	606000	544000	460000	455000	1.03	0.0709	1.23	0.298	insig
MEDP2319	Pro-Lys	Amino acid and Its metabolites	Small Peptide	C11H21N3O3	2	71227-70-8	47400	38300	47800	76200	36200	48700	42300	25500	21200	21300	23500	35900	1.46	0.0153	1.74	0.796	up
MEDP2402	Pro-Met	Amino acid and Its metabolites	Small Peptide	C10H18N2O3S	2	52899-08-8	30400	30000	60600	96800	80900	73500	23200	37600	56700	50300	60700	46600	0.647	0.234	1.35	0.436	insig
MEDP2582	Pro-Phe	Amino acid and Its metabolites	Amino acid derivatives	C14H18N2O3	2	13589-02-1	42500	37900	44500	53000	59700	65800	27400	58300	52200	47800	54300	48000	0.32	0.69	1.05	0.075	insig
MEDP1802	Proline betaine	Amino acid and Its metabolites	Amino acid derivatives	C7H13NO2	1	471-87-4	584000	468000	499000	518000	543000	468000	658000	647000	588000	453000	547000	437000	0.563	0.36	0.925	-0.113	insig
MEDP2426	Proline-Hydroxyproline	Amino acid and Its metabolites	Small Peptide	C10H16N2O4	2	18684-24-7	608000	554000	611000	774000	736000	641000	433000	669000	606000	549000	584000	599000	0.949	0.118	1.14	0.19	insig
MEDP0584	Pterine	Heterocyclic compounds	Pteridines and derivatives	C6H5N5O	2	2236-60-4	9390	15100	7740	10000	18400	18900	17200	12800	10200	12900	6950	20700	0.00174	0.945	0.985	-0.0217	insig
MEDP0174	Purine	Nucleotide and Its metabolites	Nucleotide and Its metabolites	C5H4N4	2	120-73-0	2170000	2310000	2450000	2430000	2520000	2320000	2590000	3110000	3020000	2950000	2940000	2580000	1.62	0.00162	0.827	-0.274	down
MEDP0127	Putrescine	Alcohol and amines	Polyamines	C4H12N2	2	110-60-1	562000	790000	729000	729000	824000	670000	1470000	1780000	2120000	2190000	2150000	1990000	1.86	4.44e-05	0.368	-1.44	down
MEDP2398	Pyr-Glu	Amino acid and Its metabolites	Small Peptide	C10H14N2O6	2	29227-92-7	67800	181000	114000	101000	139000	86000	117000	144000	128000	117000	166000	181000	0.859	0.203	0.808	-0.308	insig
MEDN2096	Pyrazine-2-carboxylic acid	Organic acid and Its derivatives	Organic acid and Its derivatives	C5H4N2O2	2	98-97-5	181000	136000	155000	219000	176000	162000	215000	225000	224000	225000	190000	203000	1.34	0.013	0.802	-0.318	down
MEDP0898	Pyridoxal	Heterocyclic compounds	Pteridines and derivatives	C8H9NO3	2	66-72-8	493000	276000	193000	529000	248000	154000	402000	447000	357000	250000	474000	373000	0.712	0.374	0.823	-0.282	insig
MEDN0414	Pyridoxamine	Heterocyclic compounds	Pteridines and derivatives	C8H12N2O2	1	85-87-0	4510	11000	4640	1690	5390	3100	13200	15100	6530	6470	4530	3540	0.904	0.209	0.614	-0.704	insig
MEDP0240	Pyridoxine	CoEnzyme and vitamins	CoEnzyme and vitamins	C8H11NO3	1	65-23-6	2820000	1840000	2790000	4110000	2060000	2480000	2340000	3340000	3980000	2370000	3650000	3020000	0.603	0.337	0.862	-0.215	insig
MEDP0393	Pyridoxine 5'-Phosphate	CoEnzyme and vitamins	CoEnzyme and vitamins	C8H12NO6P	1	447-05-2	157000	145000	126000	104000	161000	117000	112000	129000	103000	129000	169000	153000	0.147	0.856	1.02	0.0275	insig
MEDN1966	Pyrimidine-4-carboxylic acid	Heterocyclic compounds	Heterocyclic compounds	C5H4N2O2	2	819850-18-5	641000	578000	578000	563000	621000	596000	674000	644000	660000	607000	672000	636000	1.39	0.00818	0.919	-0.122	down
MEDP0892	Pyrocatechol	Benzene and substituted derivatives	Phenolics	C6H6O2	1	120-80-9	3270000	2910000	3320000	3520000	3220000	2870000	3740000	3460000	3300000	3300000	3370000	3600000	1.08	0.0539	0.92	-0.12	insig
MEDN1959	Pyroglutamic acid	Amino acid and Its metabolites	Amino acids	C5H7NO3	1	98-79-3	898000	1650000	1470000	1020000	1490000	1010000	1380000	1700000	1820000	1530000	1430000	1520000	1.13	0.0709	0.803	-0.316	insig
MEDP0792	Pyrrolidine	Heterocyclic compounds	Heterocyclic compounds	C4H9N	1	123-75-1	2810000	2910000	3190000	3280000	3170000	3260000	3250000	4720000	4470000	3860000	4290000	3640000	1.52	0.00736	0.768	-0.381	down
MEDN0321	Quinic acid	Organic acid and Its derivatives	Organic acid and Its derivatives	C7H12O6	1	77-95-2	267000	132000	210000	185000	279000	128000	108000	190000	195000	161000	127000	150000	0.765	0.173	1.29	0.365	insig
MEDP2643	Quinmerac	Benzene and substituted derivatives	Benzene and substituted derivatives	C11H8ClNO2	2	90717-03-6	1860000	1580000	1620000	1760000	1810000	1610000	1840000	1730000	1700000	1580000	1810000	1650000	0.12	0.855	0.993	-0.01	insig
MEDN1161	Quinolinic acid	Heterocyclic compounds	Heterocyclic compounds	C7H5NO4	2	89-00-9	280000	365000	378000	306000	432000	217000	481000	452000	480000	371000	454000	424000	1.35	0.0136	0.743	-0.429	down
MEDP0233*168	Raffinose	Carbohydrates and Its metabolites	Sugars	C18H32O16	2	512-69-6	57600	28200	83500	36800	38300	28100	49900	42000	60400	47800	60200	58200	0.693	0.442	0.856	-0.225	insig
MEDP2534	Raphanusamic acid	Organic acid and Its derivatives	Organic acid and Its derivatives	C4H5NO2S2	2	98169-56-3	52000	24000	31400	64700	65200	35600	55700	80400	45000	59800	37400	51500	0.624	0.337	0.827	-0.274	insig
MEDP0250	Riboflavin	CoEnzyme and vitamins	CoEnzyme and vitamins	C17H20N4O6	1	83-88-5	1070000	1050000	1400000	1120000	1090000	1060000	1040000	799000	937000	761000	721000	1130000	1.29	0.0238	1.26	0.334	up
MEDN0641*044	Ribose 1-phosphate	Carbohydrates and Its metabolites	Phosphate sugars	C5H11O8P	2	14075-00-4	20600000	20400000	14000000	8650000	16700000	14700000	22800000	12900000	16700000	22100000	17000000	15200000	0.559	0.44	0.891	-0.167	insig
MEDP1961	Ribosyladenosine	Nucleotide and Its metabolites	Nucleotide and Its metabolites	C15H21N5O8	2	-	3810000	3100000	4440000	4900000	3460000	5040000	4000000	3340000	6210000	3130000	3450000	3720000	0.249	0.797	1.04	0.0534	insig
MEDN0498*044	Ribulose-5-Phosphate	Carbohydrates and Its metabolites	Phosphate sugars	C5H11O8P	1	4300-28-1	20600000	20400000	14000000	8650000	16700000	14700000	22800000	12900000	16700000	22100000	17000000	15200000	0.559	0.44	0.891	-0.167	insig
MEDP0079	S-(5-Adenosy)-L-Homocysteine	Amino acid and Its metabolites	Amino acid derivatives	C14H20N6O5S	1	979-92-0	111000	67400	56600	114000	84600	77500	124000	101000	119000	72600	116000	69800	0.658	0.282	0.846	-0.242	insig
MEDP1963	S-(Methyl)glutathione	Amino acid and Its metabolites	Amino acid derivatives	C11H19N3O6S	2	2922-56-7	59300	52100	68000	21800	83300	27000	24400	33100	59800	43800	48000	53000	0.234	0.478	1.19	0.249	insig
MEDP1280	S-Adenosyl-L-Methionine	Amino acid and Its metabolites	Amino acid derivatives	C15H22N6O5S	1	17176-17-9	326000	406000	364000	571000	341000	348000	394000	609000	342000	481000	315000	576000	0.518	0.357	0.866	-0.207	insig
MEDP0082	S-Sulfo-L-Cysteine	Amino acid and Its metabolites	Amino acid derivatives	C3H7NO5S2	1	1637-71-4	254000	177000	187000	127000	148000	135000	127000	198000	245000	123000	160000	236000	0.193	0.734	0.944	-0.0829	insig
MEDP2267	S-methyl-L-thiocitrulline	Amino acid and Its metabolites	Amino acid derivatives	C7H15N3O2S	1	209589-59-3	257000	205000	154000	224000	249000	170000	246000	243000	272000	228000	223000	279000	1.01	0.0838	0.845	-0.243	insig
MEDP1488	SDMA	Organic acid and Its derivatives	Organic acid and Its derivatives	C8H18N4O2	1	30344-00-4	50500	56400	57300	43500	63100	38600	56700	33600	58400	50900	50200	41500	0.27	0.586	1.06	0.087	insig
MEDP2824	SPH(d16:1)	SL	SPH	C16H33NO2	2	-	677000	110000	636000	627000	617000	597000	854000	760000	840000	742000	742000	744000	0.855	0.0421	0.697	-0.52	insig
MEDP2241	SPH(d17:1)	SL	SPH	C17H35NO2	2	6918-48-5	263000	153000	217000	213000	249000	194000	406000	369000	393000	406000	316000	364000	1.72	2.27e-05	0.573	-0.804	down
MEDP0871	SPH(d18:0)	SL	SPH	C18H39NO2	1	764-22-7	658000	607000	587000	574000	519000	529000	1050000	835000	912000	752000	828000	960000	1.76	0.00031	0.651	-0.619	down
MEDP1051	SPH(d18:1)	SL	SPH	C18H37NO2	2	123-78-4	7710000	3420000	6080000	6570000	5590000	4940000	10200000	8950000	9800000	8650000	7460000	8830000	1.47	0.00152	0.637	-0.651	down
MEDP2825	SPH(d18:2)	SL	SPH	C18H35NO2	2	-	1020000	423000	729000	812000	463000	733000	1550000	1440000	1620000	1430000	1280000	1350000	1.65	0.000102	0.482	-1.05	down
MEDP0404	Sarcosine	Amino acid and Its metabolites	Amino acids	C3H7NO2	2	107-97-1	461000	614000	535000	464000	506000	324000	496000	489000	204000	363000	517000	507000	0.51	0.415	1.13	0.173	insig
MEDN0342	Sebacate	Organic acid and Its derivatives	Organic acid and Its derivatives	C10H18O4	1	111-20-6	333000	261000	319000	468000	901000	493000	432000	1030000	619000	435000	551000	327000	0.526	0.477	0.818	-0.29	insig
MEDP2488	Securinine	Amino acid and Its metabolites	Amino acid derivatives	C13H15NO2	2	5610-40-2	77200	60400	180000	169000	104000	91400	96100	188000	199000	96900	84400	169000	0.504	0.408	0.818	-0.29	insig
MEDN1918	Ser-Ala	Amino acid and Its metabolites	Amino acid derivatives	C6H12N2O4	2	6403-17-4	40700	9830	39800	28800	38800	48200	87800	141000	85900	147000	119000	98900	1.58	0.000273	0.303	-1.72	down
MEDP2493	Ser-Arg	Amino acid and Its metabolites	Small Peptide	C9H19N5O4	2	-	39700	15700	9280	30100	9630	13900	42600	35400	21600	39900	36600	18300	1.09	0.0814	0.609	-0.716	insig
MEDP2562	Ser-Glu	Amino acid and Its metabolites	Small Peptide	C8H14N2O6	2	6403-16-3	11100	6620	10800	9770	12600	20100	17800	23000	12800	13000	13600	15100	0.928	0.129	0.745	-0.425	insig
MEDP1947	Ser-Ile	Amino acid and Its metabolites	Small Peptide	C9H18N2O4	2	91086-51-0	219000	88600	203000	435000	262000	247000	208000	308000	345000	217000	238000	315000	0.425	0.586	0.892	-0.165	insig
MEDP1888	Ser-Leu	Amino acid and Its metabolites	Small Peptide	C9H18N2O4	2	6665-16-3	219000	88600	203000	435000	262000	247000	208000	308000	345000	217000	238000	315000	0.425	0.586	0.892	-0.165	insig
MEDP1889	Ser-Phe	Amino acid and Its metabolites	Small Peptide	C12H16N2O4	2	16875-28-8	194000	114000	148000	213000	144000	189000	164000	161000	196000	153000	165000	199000	0.217	0.734	0.965	-0.0514	insig
MEDP2414*161	Ser-Phe-Ala	Amino acid and Its metabolites	Small Peptide	C15H21N3O5	2	-	46400	36700	26500	47700	24400	30000	20600	19400	34900	46300	28700	44400	0.369	0.653	1.09	0.123	insig
MEDP2367	Ser-Pro	Amino acid and Its metabolites	Small Peptide	C8H14N2O4	2	23827-93-2	137000	166000	181000	108000	91400	173000	121000	155000	86000	117000	206000	119000	0.263	0.695	1.07	0.0952	insig
MEDP1356	Shinorine	Amino acid and Its metabolites	Amino acid derivatives	C13H20N2O8	2	73112-73-9	39000	54800	38700	30100	47000	42800	33900	30200	35000	43300	49800	36600	0.481	0.403	1.1	0.142	insig
MEDP0442	Sn-Glycero-3-Phosphocholine	Tryptamines,Cholines,Pigments	Cholines	C8H20NO6P	1	28319-77-9	572000	264000	333000	430000	343000	362000	357000	361000	374000	191000	305000	406000	0.58	0.36	1.16	0.209	insig
MEDN1475	Sorbitol 6-phosphate	Carbohydrates and Its metabolites	Phosphate sugars	C6H15O9P	2	20479-58-7	195000	159000	146000	310000	90300	221000	102000	109000	137000	97100	114000	62400	1.23	0.0408	1.81	0.853	up
MEDP0601	Spermidine	Alcohol and amines	Polyamines	C7H19N3	1	124-20-9	4870000	3960000	4500000	3910000	3880000	3180000	5040000	4150000	4600000	5800000	6590000	6070000	1.3	0.0177	0.754	-0.408	down
MEDN0344	Subericacid	Organic acid and Its derivatives	Organic acid and Its derivatives	C8H14O4	1	505-48-6	795000	1130000	911000	1200000	1570000	967000	1230000	2090000	1290000	1430000	1430000	1040000	1.02	0.113	0.772	-0.373	insig
MEDN0201*066	Succinic Acid	Organic acid and Its derivatives	Organic acid and Its derivatives	C4H6O4	1	110-15-6	5950000	6120000	6250000	9010000	7610000	7470000	5250000	9640000	8490000	7640000	8410000	6830000	0.405	0.439	0.917	-0.125	insig
MEDN0651	Succinic anhydride	Organic acid and Its derivatives	Organic acid and Its derivatives	C4H4O3	1	108-30-5	1220000	1330000	2210000	1140000	1850000	1740000	1550000	1800000	1190000	1310000	1430000	1520000	0.297	0.564	1.08	0.11	insig
MEDN1576	Sucrose 6′-monophosphate	Carbohydrates and Its metabolites	Phosphate sugars	C12H23O14P	2	36064-19-4	111000	137000	98300	92200	148000	127000	192000	140000	84500	94100	171000	63900	0.00764	0.828	0.959	-0.0609	insig
MEDN1951	Sulfoacetic acid	Organic acid and Its derivatives	Organic acid and Its derivatives	C2H4O5S	1	123-43-3	255000	356000	252000	267000	250000	197000	339000	412000	124000	294000	270000	396000	0.292	0.395	0.859	-0.219	insig
MEDP0287	Taurine	Organic acid and Its derivatives	Sulfonic acids	C2H7NO3S	2	107-35-7	431000	458000	519000	494000	544000	376000	269000	639000	376000	452000	481000	364000	0.507	0.506	1.09	0.129	insig
MEDP2797	Testosterone	Hormones and hormone related compounds	Hormones and hormone related compounds	C19H28O2	2	58-22-0	120000	114000	118000	118000	125000	83500	93700	126000	141000	122000	119000	114000	0.435	0.503	0.949	-0.0761	insig
MEDN0604	Tetradecanedioic acid	FA	FFA	C14H26O4	2	821-38-5	203000	153000	180000	298000	931000	354000	331000	1230000	547000	240000	479000	181000	0.541	0.472	0.706	-0.503	insig
MEDN1719	Tetradecyl phosphonic acid	Organic acid and Its derivatives	Organic acid and Its derivatives	C14H31O3P	2	4671-75-4	886000	760000	737000	908000	987000	865000	1110000	1060000	997000	882000	930000	880000	1.09	0.0541	0.878	-0.188	insig
MEDP2436	Tetraethylene-glycol	Alcohol and amines	Alcohols	C8H18O5	2	112-60-7	67200	50300	86100	52900	66300	94000	96300	60500	93100	68000	71200	57900	0.346	0.619	0.932	-0.101	insig
MEDP0514	Thiamine	CoEnzyme and vitamins	CoEnzyme and vitamins	C12H17N4OS+	1	59-43-8	1780000	2940000	1800000	2450000	2150000	1930000	1530000	2120000	1980000	2380000	1590000	1880000	0.618	0.28	1.14	0.183	insig
MEDN0134	Thiamine Pyrophosphate (TPP)	CoEnzyme and vitamins	CoEnzyme and vitamins	C12H19N4O7P2S	2	154-87-0	15300	17500	11900	16400	21200	11500	13900	17700	26600	12400	17300	22500	0.582	0.322	0.85	-0.235	insig
MEDP2494	Thr-Arg	Amino acid and Its metabolites	Small Peptide	C10H21N5O4	2	13448-26-5	552000	410000	409000	479000	571000	380000	688000	455000	526000	392000	545000	485000	0.546	0.378	0.906	-0.143	insig
MEDP2340	Thr-Asp	Amino acid and Its metabolites	Small Peptide	C8H14N2O6	2	108320-97-4	46400	99000	129000	80300	118000	70400	107000	110000	102000	114000	96600	99300	0.749	0.313	0.864	-0.211	insig
MEDP2351	Thr-Glu	Amino acid and Its metabolites	Small Peptide	C9H16N2O6	1	54532-73-9	32800	56700	31800	30100	39200	70600	50400	78500	44100	38600	31400	10100	0.183	0.907	1.03	0.046	insig
MEDP2416*141	Thr-Ile	Amino acid and Its metabolites	Small Peptide	C10H20N2O4	2	-	157000	92100	120000	283000	164000	204000	188000	168000	233000	153000	170000	218000	0.447	0.563	0.902	-0.148	insig
MEDP1912*141	Thr-Leu	Amino acid and Its metabolites	Small Peptide	C10H20N2O4	1	50299-12-2	157000	92100	120000	283000	164000	204000	188000	168000	233000	153000	170000	218000	0.447	0.563	0.902	-0.148	insig
MEDP1022*153	Thr-Phe	Amino acid and Its metabolites	Small Peptide	C13H18N2O4	2	16875-27-7	279000	181000	233000	367000	243000	286000	235000	238000	320000	98600	292000	260000	0.446	0.563	1.1	0.138	insig
MEDP2552	Thr-Thr	Amino acid and Its metabolites	Small Peptide	C8H16N2O5	2	-	2650	4700	3300	11300	3730	9270	10500	6720	22900	7470	7330	5690	0.964	0.196	0.578	-0.792	insig
MEDN0168	Thymidine	Nucleotide and Its metabolites	Nucleotide and Its metabolites	C10H14N2O5	1	50-89-5	31000	35700	30500	17900	45800	25100	49500	43900	60300	68700	80200	38200	1.47	0.00893	0.546	-0.873	down
MEDP0177	Thymine	Nucleotide and Its metabolites	Nucleotide and Its metabolites	C5H6N2O2	1	65-71-4	1260000	2050000	1360000	1240000	2190000	1380000	1330000	1110000	1360000	1440000	1950000	1140000	0.494	0.386	1.14	0.188	insig
MEDP2696	Traumatin	Organic acid and Its derivatives	Organic acid and Its derivatives	C12H20O3	1	65410-38-0	14200000	11800000	11700000	13100000	14000000	11600000	14300000	13800000	12700000	11500000	14400000	12800000	0.447	0.465	0.962	-0.0563	insig
MEDN1590	Tricarballylic acid	Organic acid and Its derivatives	Organic acid and Its derivatives	C6H8O6	2	99-14-9	21900	14400	38000	27900	33700	22100	48100	30200	40700	34600	39900	34000	1.18	0.0262	0.694	-0.526	down
MEDN1406	Tridecanedioic acid	FA	FFA	C13H24O4	1	505-52-2	299000	208000	284000	410000	992000	470000	443000	1130000	562000	333000	494000	238000	0.382	0.618	0.833	-0.263	insig
MEDP2066	Triethylenetetramine	Alcohol and amines	Polyamines	C6H18N4	2	112-24-3	1040000	609000	642000	772000	1300000	552000	1550000	1020000	1030000	687000	1760000	1070000	0.992	0.0978	0.69	-0.535	insig
MEDP0251	Trigonelline	CoEnzyme and vitamins	CoEnzyme and vitamins	C7H7NO2	1	535-83-1	188000	218000	220000	217000	158000	144000	232000	304000	204000	230000	331000	278000	1.32	0.0158	0.725	-0.464	down
MEDP0084*101	Trimethylamine-N-Oxide	Alcohol and amines	Amines	C3H9NO	2	1184-78-7	44100	25600	21200	20100	13700	16900	71300	13400	24900	37300	11100	12100	0.0906	0.663	0.832	-0.266	insig
MEDN1878	Trolox	Benzene and substituted derivatives	Benzene and substituted derivatives	C14H18O4	2	53188-07-1	154000	135000	99400	135000	145000	110000	146000	144000	128000	137000	81200	156000	0.0492	0.868	0.982	-0.0259	insig
MEDN1717*072	Tropate	Organic acid and Its derivatives	Organic acid and Its derivatives	C9H10O3	1	529-64-6	19100	18000	19800	18000	17200	19700	32200	22100	35500	21000	28000	19400	1.39	0.0335	0.706	-0.503	down
MEDN0209	Tryptamine	Tryptamines,Cholines,Pigments	Tryptamines	C10H12N2	1	61-54-1	128000	125000	112000	143000	137000	134000	171000	179000	168000	153000	190000	173000	1.69	8.25e-05	0.752	-0.412	down
MEDP2575	Tyr-Ala	Amino acid and Its metabolites	Small Peptide	C12H16N2O4	2	730-08-5	128000	114000	101000	104000	147000	74400	131000	48600	37800	137000	138000	128000	0.44	0.719	1.08	0.109	insig
MEDP2385	Tyr-Asn	Amino acid and Its metabolites	Small Peptide	C13H17N3O5	2	151145-11-8	66800	43700	59300	56400	35100	72100	42200	71100	68300	85200	70000	46500	0.516	0.365	0.869	-0.202	insig
MEDP2388	Tyr-Asp	Amino acid and Its metabolites	Small Peptide	C13H16N2O6	2	87085-11-8	109000	257000	196000	212000	157000	235000	101000	118000	149000	147000	137000	132000	1.22	0.0329	1.49	0.574	up
MEDP2391	Tyr-Glu	Amino acid and Its metabolites	Small Peptide	C14H18N2O6	2	2545-89-3	214000	177000	206000	203000	196000	230000	164000	176000	171000	213000	218000	159000	0.931	0.138	1.11	0.154	insig
MEDP2566	Tyr-Gly	Amino acid and Its metabolites	Small Peptide	C11H14N2O4	2	673-08-5	834000	644000	796000	1210000	1070000	1150000	812000	1050000	1220000	849000	1200000	1010000	0.35	0.539	0.928	-0.107	insig
MEDP1894	Tyr-Leu	Amino acid and Its metabolites	Small Peptide	C15H22N2O4	1	17355-10-1	121000	104000	119000	234000	149000	113000	157000	165000	151000	130000	194000	176000	0.702	0.339	0.863	-0.213	insig
MEDP2430	Tyr-Pro	Amino acid and Its metabolites	Small Peptide	C14H18N2O4	2	51871-47-7	92700	112000	105000	112000	140000	127000	127000	155000	158000	129000	155000	183000	1.36	0.0079	0.76	-0.396	down
MEDP2432	Tyr-Tyr	Amino acid and Its metabolites	Small Peptide	C18H20N2O5	2	1050-28-8	30400	34100	25000	28400	20000	27500	21200	15800	38600	38200	34600	41400	0.298	0.414	0.87	-0.2	insig
MEDN0538	UDP-glucose	Carbohydrates and Its metabolites	Sugars	C15H24N2O17P2	1	133-89-1	186000	147000	260000	280000	245000	237000	205000	321000	300000	346000	263000	248000	0.912	0.0904	0.804	-0.314	insig
MEDN1716	Ubenimex	Amino acid and Its metabolites	Small Peptide	C16H24N2O4	2	65391-42-6	20200	11300	24600	20000	31000	11600	1120	22500	29200	12300	21400	2810	0.69	0.403	1.33	0.411	insig
MEDN0169	Uracil	Nucleotide and Its metabolites	Nucleotide and Its metabolites	C4H4N2O2	1	66-22-8	605000	777000	587000	558000	629000	754000	812000	820000	651000	575000	623000	499000	0.14	0.858	0.982	-0.026	insig
MEDP0086	Urea	Alcohol and amines	Amines	CH4N2O	1	57-13-6	127000	105000	130000	125000	118000	104000	116000	126000	99600	133000	102000	138000	0.0182	0.921	0.993	-0.00989	insig
MEDN1306	Ureidosuccinic acid	Amino acid and Its metabolites	Amino acid derivatives	C5H8N2O5	1	13184-27-5	21400	35600	33200	31100	43500	26500	82800	129000	100000	106000	139000	103000	1.83	9.39e-05	0.29	-1.79	down
MEDN1006	Uric acid	Organic acid and Its derivatives	Organic acid and Its derivatives	C5H4N4O3	1	69-93-2	34700	44800	14200	26200	41900	50000	32100	33800	31200	28100	28500	40000	0.0775	0.615	1.09	0.129	insig
MEDN0171	Uridine	Nucleotide and Its metabolites	Nucleotide and Its metabolites	C9H12N2O6	1	58-96-8	1730000	1850000	2030000	1930000	2550000	2500000	1950000	1300000	1950000	2080000	1780000	1830000	0.874	0.147	1.16	0.21	insig
MEDN0419	Uridine 5-Monophosphate	Nucleotide and Its metabolites	Nucleotide and Its metabolites	C9H13N2O9P	2	58-97-9	180000	285000	248000	254000	281000	201000	233000	313000	224000	337000	299000	264000	0.805	0.179	0.868	-0.204	insig
MEDN1117	Uridine-5'-diphospho-N-acetylgalactosamine?disodium?salt	Nucleotide and Its metabolites	Nucleotide and Its metabolites	C17H27N3O17P2	2	528-04-1	347000	581000	519000	514000	605000	372000	403000	570000	641000	536000	562000	444000	0.462	0.535	0.931	-0.103	insig
MEDP1255	Urobilin	Tryptamines,Cholines,Pigments	Pigments	C33H42N4O6	1	1856-98-0	28900	25700	28300	33700	25000	21300	22400	38300	31600	24600	42600	33000	0.7	0.209	0.846	-0.241	insig
MEDN1548	Val-Ala	Amino acid and Its metabolites	Small Peptide	C8H16N2O3	2	27493-61-4	1780000	2160000	2010000	2210000	3240000	2100000	2400000	3160000	3010000	2640000	2430000	2160000	0.914	0.174	0.855	-0.226	insig
MEDN1932*045	Val-Asn	Amino acid and Its metabolites	Small Peptide	C9H17N3O4	1	66170-00-1	26500	18200	32200	53000	18500	28300	32800	32300	31600	30500	38900	38100	0.645	0.433	0.866	-0.208	insig
MEDN1946*047	Val-Asp	Amino acid and Its metabolites	Small Peptide	C9H16N2O5	2	20556-16-5	378000	92900	256000	603000	226000	440000	212000	205000	173000	184000	220000	146000	0.887	0.11	1.75	0.808	insig
MEDP2399	Val-Glu	Amino acid and Its metabolites	Small Peptide	C10H18N2O5	2	425000	128000	78500	101000	125000	124000	122000	133000	141000	174000	122000	112000	145000	0.998	0.0619	0.82	-0.286	insig
MEDP2433*138	Val-Ile	Amino acid and Its metabolites	Small Peptide	C11H22N2O3	2	20556-14-3	66400	21800	41300	92400	48600	46100	41300	47300	45200	24700	43300	65200	0.38	0.481	1.19	0.246	insig
MEDP2434*138	Val-Leu	Amino acid and Its metabolites	Small Peptide	C11H22N2O3	2	3989-97-7	66400	21800	41300	92400	48600	46100	41300	47300	45200	24700	43300	65200	0.38	0.481	1.19	0.246	insig
MEDN1942	Val-Thr	Amino acid and Its metabolites	Small Peptide	C9H18N2O4	2	72636-02-3	6440000	5680000	8920000	11000000	6860000	7330000	10200000	5480000	7540000	5870000	6120000	7700000	0.364	0.607	1.08	0.11	insig
MEDP1766	Val-Tyr	Amino acid and Its metabolites	Small Peptide	C14H20N2O4	2	3061-91-4	45100	16000	41800	50900	47000	46000	34300	31000	35400	39100	37700	36000	0.368	0.337	1.16	0.21	insig
MEDN2297	Vanillic acid 4-O-sulfate	Organic acid and Its derivatives	Sulfonic acids	C8H8O7S	2	71235-86-4	132000	188000	183000	242000	193000	211000	283000	248000	282000	219000	195000	174000	0.954	0.106	0.819	-0.287	insig
MEDN0140	Xanthine	Nucleotide and Its metabolites	Nucleotide and Its metabolites	C5H4N4O2	1	69-89-6	207000	162000	237000	252000	245000	235000	186000	278000	260000	225000	180000	221000	0.0111	0.922	0.991	-0.0136	insig
MEDN0533	Xanthosine	Nucleotide and Its metabolites	Nucleotide and Its metabolites	C10H12N4O6	1	146-80-5	5980000	7470000	8330000	8080000	7460000	6050000	6660000	6870000	9510000	7730000	8470000	6140000	0.345	0.621	0.956	-0.0656	insig
MEDN1802	Zereno	Benzene and substituted derivatives	Benzene and substituted derivatives	C18H26O5	2	26538-44-3	226000	190000	186000	182000	182000	146000	248000	206000	175000	146000	151000	233000	0.166	0.714	0.96	-0.0586	insig
MEDN2287	alpha-Methoxy-1H-indole-3-propanoic acid	Heterocyclic compounds	Indole and Its derivatives	C12H13NO3	2	-	3200000	2970000	3490000	3850000	3340000	3390000	3620000	3270000	3580000	3350000	3530000	3320000	0.33	0.592	0.978	-0.0321	insig
MEDP2031	alpha-Methyl-m-tyrosine	Amino acid and Its metabolites	Amino acid derivatives	C10H13NO3	2	305-96-4	275000	343000	262000	313000	329000	272000	340000	303000	359000	260000	316000	252000	0.215	0.798	0.981	-0.0281	insig
MEDN1970	cyclo(glu-glu)	Amino acid and Its metabolites	Small Peptide	C10H14N2O6	2	16691-00-2	205000	177000	227000	171000	163000	201000	221000	328000	271000	138000	226000	218000	0.777	0.169	0.816	-0.293	insig
MEDP2805	gamma-Glu-Phe	Amino acid and Its metabolites	polypeptide	C14H18N2O5	2	7432-24-8	121000	162000	141000	113000	128000	161000	187000	175000	217000	233000	321000	210000	1.57	0.00784	0.614	-0.703	down
MEDP2688	methylcarbamyl PAF	FA	Others	C26H55N2O7P+	2	91575-58-5	90900000	75300000	74200000	76000000	80700000	77600000	121000000	117000000	105000000	65100000	92200000	88600000	1.06	0.0745	0.806	-0.312	insig
MEDP2810	n-Oleoylethanolamine	FA	Others	C20H39NO2	2	111-58-0	18000	19400	16700	16100	18100	17500	40200	29300	36000	28700	24300	24500	1.75	0.00387	0.578	-0.791	down
MEDP0180	Β-Nicotinamide Mononucleotide	Nucleotide and Its metabolites	Nucleotide and Its metabolites	C11H15N2O8P	1	1094-61-7	1110000	1480000	1420000	1550000	1310000	1340000	2270000	1050000	983000	1230000	1610000	1590000	0.0857	0.684	0.94	-0.0898	insig
MEDN0434	Β-Pseudouridine	Nucleotide and Its metabolites	Nucleotide and Its metabolites	C9H12N2O6	1	1445-07-4	1120000	2190000	1650000	837000	1310000	1010000	1580000	1300000	1690000	2340000	2420000	1420000	0.982	0.149	0.755	-0.406	insig
MEDN1965	α-Hydroxyglutaric Acid (sodium salt)	Organic acid and Its derivatives	Organic acid and Its derivatives	C5H8O5	2	40951-21-1	446000	890000	756000	552000	578000	636000	281000	469000	497000	478000	565000	389000	1.18	0.0313	1.44	0.527	up
MEDN0202	α-Ketoglutaric Acid (α-KG)	Organic acid and Its derivatives	Organic acid and Its derivatives	C5H6O5	1	328-50-7	27900	29900	35200	27100	28500	29400	33400	23300	11300	37100	34100	30400	0.402	0.74	1.05	0.0704	insig
MEDP1005*102	β-Alanine	Amino acid and Its metabolites	Amino acids	C3H7NO2	2	107-95-9	968000	315000	453000	475000	746000	386000	280000	591000	701000	698000	738000	171000	0.162	0.852	1.05	0.0723	insig
MEDN0074	γ-Glu-Cys	Amino acid and Its metabolites	Small Peptide	C8H14N2O5S	1	636-58-8	94400	73500	87000	76700	85600	75400	69700	74800	55800	72700	82100	66100	1.17	0.0367	1.17	0.226	up
MEDN1940*053	γ-Glu-Gln	Amino acid and Its metabolites	Small Peptide	C10H17N3O6	2	10148-81-9	63800	59500	23200	60100	48700	78700	69600	80100	71100	75800	80000	63100	0.973	0.0701	0.76	-0.396	insig
MEDP0541	δ-Valerolactam	Alcohol and amines	Amines	C5H9NO	1	675-20-7	1370000	1240000	1210000	1280000	1320000	1620000	1800000	1390000	1470000	1320000	1410000	1400000	0.767	0.212	0.916	-0.127	insig

## Sheet: KEGG_enrich
Kegg_pathway	ko_ID	Cluster_frequency	Metabolome_frequency	P-value	Corrected_P-value	RichFactor
Choline metabolism in cancer	ko05231	11 out of 109 10.0917431192661%	16 out of 303 5.28052805280528%	0.00648	0.687	0.6875
Glycerophospholipid metabolism	ko00564	12 out of 109 11.0091743119266%	19 out of 303 6.27062706270627%	0.012	1	0.631579
Riboflavin metabolism	ko00740	4 out of 109 3.6697247706422%	4 out of 303 1.32013201320132%	0.0162	1	1
Arachidonic acid metabolism	ko00590	3 out of 109 2.75229357798165%	3 out of 303 0.99009900990099%	0.0457	1	1
2-Oxocarboxylic acid metabolism	ko01210	11 out of 109 10.0917431192661%	20 out of 303 6.6006600660066%	0.0578	1	0.55
Antifolate resistance	ko01523	4 out of 109 3.6697247706422%	5 out of 303 1.65016501650165%	0.0581	1	0.8
Sphingolipid signaling pathway	ko04071	4 out of 109 3.6697247706422%	5 out of 303 1.65016501650165%	0.0581	1	0.8
Thermogenesis	ko04714	7 out of 109 6.42201834862385%	12 out of 303 3.96039603960396%	0.0923	1	0.583333
Ubiquinone and other terpenoid-quinone biosynthesis	ko00130	2 out of 109 1.8348623853211%	2 out of 303 0.66006600660066%	0.129	1	1
Sphingolipid metabolism	ko00600	3 out of 109 2.75229357798165%	4 out of 303 1.32013201320132%	0.134	1	0.75
Valine, leucine and isoleucine biosynthesis	ko00290	3 out of 109 2.75229357798165%	4 out of 303 1.32013201320132%	0.134	1	0.75
cGMP-PKG signaling pathway	ko04022	3 out of 109 2.75229357798165%	4 out of 303 1.32013201320132%	0.134	1	0.75
Purine metabolism	ko00230	13 out of 109 11.9266055045872%	29 out of 303 9.57095709570957%	0.199	1	0.448276
Phenylalanine, tyrosine and tryptophan biosynthesis	ko00400	4 out of 109 3.6697247706422%	7 out of 303 2.31023102310231%	0.214	1	0.571429
Biosynthesis of amino acids	ko01230	19 out of 109 17.4311926605505%	45 out of 303 14.8514851485149%	0.217	1	0.422222
Tryptophan metabolism	ko00380	6 out of 109 5.5045871559633%	12 out of 303 3.96039603960396%	0.231	1	0.5
Glycine, serine and threonine metabolism	ko00260	7 out of 109 6.42201834862385%	15 out of 303 4.95049504950495%	0.267	1	0.466667
Inositol phosphate metabolism	ko00562	2 out of 109 1.8348623853211%	3 out of 303 0.99009900990099%	0.294	1	0.666667
Morphine addiction	ko05032	2 out of 109 1.8348623853211%	3 out of 303 0.99009900990099%	0.294	1	0.666667
Olfactory transduction	ko04740	2 out of 109 1.8348623853211%	3 out of 303 0.99009900990099%	0.294	1	0.666667
Prolactin signaling pathway	ko04917	2 out of 109 1.8348623853211%	3 out of 303 0.99009900990099%	0.294	1	0.666667
Mineral absorption	ko04978	6 out of 109 5.5045871559633%	13 out of 303 4.29042904290429%	0.307	1	0.461538
beta-Alanine metabolism	ko00410	5 out of 109 4.58715596330275%	11 out of 303 3.63036303630363%	0.356	1	0.454545
Apoptosis	ko04210	1 out of 109 0.917431192660551%	1 out of 303 0.33003300330033%	0.36	1	1
Fatty acid metabolism	ko01212	1 out of 109 0.917431192660551%	1 out of 303 0.33003300330033%	0.36	1	1
Glycosylphosphatidylinositol (GPI)-anchor biosynthesis	ko00563	1 out of 109 0.917431192660551%	1 out of 303 0.33003300330033%	0.36	1	1
Necroptosis	ko04217	1 out of 109 0.917431192660551%	1 out of 303 0.33003300330033%	0.36	1	1
PI3K-Akt signaling pathway	ko04151	1 out of 109 0.917431192660551%	1 out of 303 0.33003300330033%	0.36	1	1
Phosphatidylinositol signaling system	ko04070	1 out of 109 0.917431192660551%	1 out of 303 0.33003300330033%	0.36	1	1
Phototransduction	ko04744	1 out of 109 0.917431192660551%	1 out of 303 0.33003300330033%	0.36	1	1
Parkinson disease	ko05012	3 out of 109 2.75229357798165%	6 out of 303 1.98019801980198%	0.372	1	0.5
Nucleotide metabolism	ko01232	12 out of 109 11.0091743119266%	30 out of 303 9.9009900990099%	0.383	1	0.4
Protein digestion and absorption	ko04974	10 out of 109 9.1743119266055%	25 out of 303 8.25082508250825%	0.407	1	0.4
Porphyrin metabolism	ko00860	4 out of 109 3.6697247706422%	9 out of 303 2.97029702970297%	0.415	1	0.444444
Tyrosine metabolism	ko00350	4 out of 109 3.6697247706422%	9 out of 303 2.97029702970297%	0.415	1	0.444444
Biosynthesis of cofactors	ko01240	20 out of 109 18.348623853211%	53 out of 303 17.4917491749175%	0.442	1	0.377358
Arginine biosynthesis	ko00220	5 out of 109 4.58715596330275%	12 out of 303 3.96039603960396%	0.445	1	0.416667
Glutathione metabolism	ko00480	5 out of 109 4.58715596330275%	12 out of 303 3.96039603960396%	0.445	1	0.416667
Alcoholism	ko05034	2 out of 109 1.8348623853211%	4 out of 303 1.32013201320132%	0.455	1	0.5
Inflammatory mediator regulation of TRP channels	ko04750	2 out of 109 1.8348623853211%	4 out of 303 1.32013201320132%	0.455	1	0.5
Fructose and mannose metabolism	ko00051	3 out of 109 2.75229357798165%	7 out of 303 2.31023102310231%	0.491	1	0.428571
Aminoacyl-tRNA biosynthesis	ko00970	8 out of 109 7.3394495412844%	21 out of 303 6.93069306930693%	0.502	1	0.380952
Bile secretion	ko04976	4 out of 109 3.6697247706422%	10 out of 303 3.3003300330033%	0.514	1	0.4
Arginine and proline metabolism	ko00330	6 out of 109 5.5045871559633%	16 out of 303 5.28052805280528%	0.545	1	0.375
D-Amino acid metabolism	ko00470	9 out of 109 8.25688073394495%	25 out of 303 8.25082508250825%	0.578	1	0.36
African trypanosomiasis	ko05143	1 out of 109 0.917431192660551%	2 out of 303 0.66006600660066%	0.591	1	0.5
Cholinergic synapse	ko04725	1 out of 109 0.917431192660551%	2 out of 303 0.66006600660066%	0.591	1	0.5
Dopaminergic synapse	ko04728	1 out of 109 0.917431192660551%	2 out of 303 0.66006600660066%	0.591	1	0.5
Fatty acid degradation	ko00071	1 out of 109 0.917431192660551%	2 out of 303 0.66006600660066%	0.591	1	0.5
Melanogenesis	ko04916	1 out of 109 0.917431192660551%	2 out of 303 0.66006600660066%	0.591	1	0.5
Parathyroid hormone synthesis, secretion and action	ko04928	1 out of 109 0.917431192660551%	2 out of 303 0.66006600660066%	0.591	1	0.5
Pertussis	ko05133	1 out of 109 0.917431192660551%	2 out of 303 0.66006600660066%	0.591	1	0.5
Serotonergic synapse	ko04726	1 out of 109 0.917431192660551%	2 out of 303 0.66006600660066%	0.591	1	0.5
Shigellosis	ko05131	1 out of 109 0.917431192660551%	2 out of 303 0.66006600660066%	0.591	1	0.5
Regulation of lipolysis in adipocytes	ko04923	2 out of 109 1.8348623853211%	5 out of 303 1.65016501650165%	0.592	1	0.4
Vitamin digestion and absorption	ko04977	4 out of 109 3.6697247706422%	11 out of 303 3.63036303630363%	0.604	1	0.363636
ABC transporters	ko02010	15 out of 109 13.7614678899083%	43 out of 303 14.1914191419142%	0.626	1	0.348837
Phenylalanine metabolism	ko00360	3 out of 109 2.75229357798165%	9 out of 303 2.97029702970297%	0.688	1	0.333333
Taste transduction	ko04742	3 out of 109 2.75229357798165%	9 out of 303 2.97029702970297%	0.688	1	0.333333
Diabetic cardiomyopathy	ko05415	2 out of 109 1.8348623853211%	6 out of 303 1.98019801980198%	0.701	1	0.333333
Renin secretion	ko04924	2 out of 109 1.8348623853211%	6 out of 303 1.98019801980198%	0.701	1	0.333333
Valine, leucine and isoleucine degradation	ko00280	2 out of 109 1.8348623853211%	6 out of 303 1.98019801980198%	0.701	1	0.333333
Amphetamine addiction	ko05031	1 out of 109 0.917431192660551%	3 out of 303 0.99009900990099%	0.739	1	0.333333
Carbohydrate digestion and absorption	ko04973	1 out of 109 0.917431192660551%	3 out of 303 0.99009900990099%	0.739	1	0.333333
Cocaine addiction	ko05030	1 out of 109 0.917431192660551%	3 out of 303 0.99009900990099%	0.739	1	0.333333
Cortisol synthesis and secretion	ko04927	1 out of 109 0.917431192660551%	3 out of 303 0.99009900990099%	0.739	1	0.333333
Cushing syndrome	ko04934	1 out of 109 0.917431192660551%	3 out of 303 0.99009900990099%	0.739	1	0.333333
Insulin secretion	ko04911	1 out of 109 0.917431192660551%	3 out of 303 0.99009900990099%	0.739	1	0.333333
Longevity regulating pathway	ko04211	1 out of 109 0.917431192660551%	3 out of 303 0.99009900990099%	0.739	1	0.333333
Lysosome	ko04142	1 out of 109 0.917431192660551%	3 out of 303 0.99009900990099%	0.739	1	0.333333
Nitrogen metabolism	ko00910	1 out of 109 0.917431192660551%	3 out of 303 0.99009900990099%	0.739	1	0.333333
Primary bile acid biosynthesis	ko00120	1 out of 109 0.917431192660551%	3 out of 303 0.99009900990099%	0.739	1	0.333333
Starch and sucrose metabolism	ko00500	1 out of 109 0.917431192660551%	3 out of 303 0.99009900990099%	0.739	1	0.333333
Vascular smooth muscle contraction	ko04270	1 out of 109 0.917431192660551%	3 out of 303 0.99009900990099%	0.739	1	0.333333
mTOR signaling pathway	ko04150	1 out of 109 0.917431192660551%	3 out of 303 0.99009900990099%	0.739	1	0.333333
Amino sugar and nucleotide sugar metabolism	ko00520	4 out of 109 3.6697247706422%	13 out of 303 4.29042904290429%	0.751	1	0.307692
Biosynthesis of nucleotide sugars	ko01250	4 out of 109 3.6697247706422%	13 out of 303 4.29042904290429%	0.751	1	0.307692
Nicotinate and nicotinamide metabolism	ko00760	4 out of 109 3.6697247706422%	13 out of 303 4.29042904290429%	0.751	1	0.307692
cAMP signaling pathway	ko04024	2 out of 109 1.8348623853211%	7 out of 303 2.31023102310231%	0.786	1	0.285714
AMPK signaling pathway	ko04152	1 out of 109 0.917431192660551%	4 out of 303 1.32013201320132%	0.834	1	0.25
Aldosterone synthesis and secretion	ko04925	1 out of 109 0.917431192660551%	4 out of 303 1.32013201320132%	0.834	1	0.25
Ferroptosis	ko04216	1 out of 109 0.917431192660551%	4 out of 303 1.32013201320132%	0.834	1	0.25
FoxO signaling pathway	ko04068	1 out of 109 0.917431192660551%	4 out of 303 1.32013201320132%	0.834	1	0.25
HIF-1 signaling pathway	ko04066	1 out of 109 0.917431192660551%	4 out of 303 1.32013201320132%	0.834	1	0.25
Insulin resistance	ko04931	1 out of 109 0.917431192660551%	4 out of 303 1.32013201320132%	0.834	1	0.25
Pantothenate and CoA biosynthesis	ko00770	2 out of 109 1.8348623853211%	8 out of 303 2.64026402640264%	0.848	1	0.25
Sulfur metabolism	ko00920	2 out of 109 1.8348623853211%	8 out of 303 2.64026402640264%	0.848	1	0.25
Central carbon metabolism in cancer	ko05230	8 out of 109 7.3394495412844%	28 out of 303 9.24092409240924%	0.857	1	0.285714
Neuroactive ligand-receptor interaction	ko04080	3 out of 109 2.75229357798165%	12 out of 303 3.96039603960396%	0.869	1	0.25
Caffeine metabolism	ko00232	1 out of 109 0.917431192660551%	5 out of 303 1.65016501650165%	0.894	1	0.2
Galactose metabolism	ko00052	1 out of 109 0.917431192660551%	5 out of 303 1.65016501650165%	0.894	1	0.2
Neomycin, kanamycin and gentamicin biosynthesis	ko00524	1 out of 109 0.917431192660551%	5 out of 303 1.65016501650165%	0.894	1	0.2
Oxidative phosphorylation	ko00190	1 out of 109 0.917431192660551%	5 out of 303 1.65016501650165%	0.894	1	0.2
Pathways of neurodegeneration - multiple diseases	ko05022	1 out of 109 0.917431192660551%	5 out of 303 1.65016501650165%	0.894	1	0.2
Thyroid hormone synthesis	ko04918	1 out of 109 0.917431192660551%	5 out of 303 1.65016501650165%	0.894	1	0.2
Cysteine and methionine metabolism	ko00270	4 out of 109 3.6697247706422%	17 out of 303 5.61056105610561%	0.917	1	0.235294
Butanoate metabolism	ko00650	1 out of 109 0.917431192660551%	6 out of 303 1.98019801980198%	0.933	1	0.166667
Ascorbate and aldarate metabolism	ko00053	1 out of 109 0.917431192660551%	7 out of 303 2.31023102310231%	0.958	1	0.142857
Pyruvate metabolism	ko00620	1 out of 109 0.917431192660551%	7 out of 303 2.31023102310231%	0.958	1	0.142857
Thiamine metabolism	ko00730	1 out of 109 0.917431192660551%	7 out of 303 2.31023102310231%	0.958	1	0.142857
Pyrimidine metabolism	ko00240	5 out of 109 4.58715596330275%	23 out of 303 7.59075907590759%	0.961	1	0.217391
Histidine metabolism	ko00340	1 out of 109 0.917431192660551%	9 out of 303 2.97029702970297%	0.983	1	0.111111
Alanine, aspartate and glutamate metabolism	ko00250	2 out of 109 1.8348623853211%	14 out of 303 4.62046204620462%	0.985	1	0.142857
Lysine degradation	ko00310	1 out of 109 0.917431192660551%	13 out of 303 4.29042904290429%	0.997	1	0.0769231
Metabolic pathways	ko01100	80 out of 109 73.394495412844%	251 out of 303 82.8382838283828%	1	1	0.318725
Carbon metabolism	ko01200	1 out of 109 0.917431192660551%	24 out of 303 7.92079207920792%	1	1	0.0416667

## Sheet: MSEA
name	Total Cmpd	Hits	P-value	Holm p	FDR	foldEnrichment	hitCompound	member	reference
D-Arginine and D-ornithine metabolism	4	1	4.9401e-08	2.4701e-06	2.4701e-06	10.4985	D-Ornithine	D-Ornithine; D-Arginine; 5-Amino-2-oxopentanoic acid; 5-Guanidino-2-oxopentanoate	http://www.genome.jp/kegg-bin/show_pathway?hsa00472
Valine, leucine and isoleucine biosynthesis	8	3	1.8568e-05	0.00090983	0.00023636	9.34748	L-Threonine,L-Isoleucine,L-Valine	L-Threonine; (S)-3-Methyl-2-oxopentanoic acid; L-Leucine; 3-Methyl-2-oxobutanoic acid; 2-Oxobutanoate; L-Isoleucine; 4-Methyl-2-oxopentanoate; L-Valine	http://www.genome.jp/kegg-bin/show_pathway?hsa00290
Valine, leucine and isoleucine degradation	40	2	1.8571e-05	0.00090983	0.00023636	9.34792	L-Valine,L-Isoleucine	Enzyme N6-(lipoyl)lysine; 2-Methyl-1-hydroxybutyl-ThPP; Enzyme N6-(dihydrolipoyl)lysine; 2-Methyl-1-hydroxypropyl-ThPP; 3-Methyl-1-hydroxybutyl-ThPP; Acetyl-CoA; Acetoacetyl-CoA; Acetoacetate; (S)-3-Hydroxy-3-methylglutaryl-CoA; 3-Methylcrotonyl-CoA; 3-Methylbutanoyl-CoA; Thiamin diphosphate; (S)-3-Methyl-2-oxopentanoic acid; L-Valine; 2-Methylacetoacetyl-CoA; (S)-3-Hydroxyisobutyrate; 2-Methylbu…	http://www.genome.jp/kegg-bin/show_pathway?hsa00280
Pantothenate and CoA biosynthesis	19	4	1.8909e-05	0.00090983	0.00023636	9.29468	Pantetheine,L-Valine,L-Cysteine,Uracil	Dephospho-CoA; Pantetheine 4'-phosphate; Pantetheine; (R)-4'-Phosphopantothenoyl-L-cysteine; N-((R)-Pantothenoyl)-L-cysteine; Pantothenate; 3-Ureidopropionate; 5,6-Dihydrouracil; L-Valine; L-Aspartate; Apo-[acyl-carrier-protein]; CoA; D-4'-Phosphopantothenate; L-Cysteine; beta-Alanine; Uracil; 3-Methyl-2-oxobutanoic acid; Adenosine 3',5'-bisphosphate; Acyl-carrier protein	http://www.genome.jp/kegg-bin/show_pathway?hsa00770
Glycine, serine and threonine metabolism	33	6	5.163e-05	0.002375	0.00051068	7.99371	L-Serine,Choline,Sarcosine,L-Threonine,Creatine,L-Cysteine	L-Serine; Choline; Betaine aldehyde; Betaine; Guanidinoacetate; 3-Phospho-D-glycerate; N,N-Dimethylglycine; L-Cystathionine; Glycine; O-Phospho-L-serine; Sarcosine; 5,10-Methylenetetrahydrofolate; L-Threonine; Lipoylprotein; Aminoacetone; D-Glycerate; [Protein]-S8-aminomethyldihydrolipoyllysine; Tetrahydrofolate; Dihydrolipoylprotein; 2-Phospho-D-glycerate; D-Serine; Hydroxypyruvate; Creatine; 3-…	http://www.genome.jp/kegg-bin/show_pathway?hsa00260
Arginine and proline metabolism	38	8	6.1281e-05	0.0027577	0.00051068	8.64436	L-Arginine,Creatine,Agmatine,Putrescine,Spermidine,L-Proline,Phosphocreatine,1-Pyrroline-4-hydroxy-2-carboxylate	L-Arginine; N(omega)-Hydroxyarginine; Guanidinoacetate; Creatine; 4-Aminobutanoate; Agmatine; Putrescine; 4-Aminobutyraldehyde; S-Adenosylmethioninamine; S-Adenosyl-L-methionine; Spermidine; N-Acetylputrescine; N4-Acetylaminobutanal; Spermine; trans-3-Hydroxy-L-proline; D-Proline; (4R)-4-Hydroxy-2-oxoglutarate; L-erythro-4-Hydroxyglutamate; L-4-Hydroxyglutamate semialdehyde; L-1-Pyrroline-3-hydro…	http://www.genome.jp/kegg-bin/show_pathway?hsa00330
Purine metabolism	65	14	0.0010128	0.044563	0.0061846	5.40046	Xanthine,L-Glutamine,Adenosine,Deoxyadenosine,Deoxyinosine,Xanthosine,IDP,Hypoxanthine,Inosine,Guanine,Deoxyguanosine,Guanosine,Adenine,Urea	GDP; Xanthine; D-Ribose 5-phosphate; L-Glutamine; 5-Phospho-alpha-D-ribose 1-diphosphate; 5-Phosphoribosylamine; 5'-Phosphoribosylglycinamide; 2-(Formamido)-N1-(5'-phosphoribosyl)acetamidine; 1-(5'-Phosphoribosyl)-5-amino-4-imidazolecarboxamide; 1-(5'-Phosphoribosyl)-5-amino-4-(N-succinocarboxamide)-imidazole; 1-(5-Phospho-D-ribosyl)-5-amino-4-imidazolecarboxylate; 1-(5'-Phosphoribosyl)-5-formami…	http://www.genome.jp/kegg-bin/show_pathway?hsa00230
Glutathione metabolism	28	4	0.0010273	0.044563	0.0061846	6.54369	L-Cysteine,Putrescine,Spermidine,Cadaverine	R-S-Cysteinylglycine; R-S-Glutathione; Glutathione; NADP+; Glutathione disulfide; NADPH; Glycine; gamma-L-Glutamyl-L-cysteine; L-Glutamate; L-Cysteine; Cys-Gly; 5-Oxoproline; L-Amino acid; (5-L-Glutamyl)-L-amino acid; S-Substituted L-cysteine; Acetyl-CoA; RX; L-Ornithine; Putrescine; Spermidine; Cadaverine; Tryparedoxin; Trypanothione; S-Substituted N-acetyl-L-cysteine; Spermine; Aminopropylcadav…	http://www.genome.jp/kegg-bin/show_pathway?hsa00480
Glycerophospholipid metabolism	36	2	0.0011677	0.049044	0.0061846	7.34746	Choline,Acetylcholine	Phosphatidylethanolamine; Phosphatidylcholine; Glycerone phosphate; 1-Acyl-sn-glycero-3-phosphocholine; CDP-choline; 1,2-Diacyl-sn-glycerol; Choline phosphate; Choline; Acetylcholine; Ethanolamine phosphate; Ethanolamine; Phosphatidate; Phosphatidylserine; 1-Acyl-sn-glycerol 3-phosphate; CDP-diacylglycerol; sn-Glycerol 3-phosphate; sn-Glycero-3-phosphocholine; CDP-ethanolamine; 1-Acyl-sn-glycero-…	http://www.genome.jp/kegg-bin/show_pathway?hsa00564
Aminoacyl-tRNA biosynthesis	48	16	0.0014624	0.059957	0.0061846	7.03396	L-Histidine,L-Phenylalanine,L-Arginine,L-Glutamine,L-Cysteine,L-Serine,L-Methionine,L-Valine,L-Alanine,L-Lysine,L-Isoleucine,L-Threonine,L-Tryptophan,10-Formyltetrahydrofolate,L-Tyrosine,L-Proline	L-Asparagine; L-Histidine; L-Phenylalanine; L-Arginine; L-Glutamine; L-Cysteine; Glycine; L-Aspartate; L-Serine; L-Methionine; L-Valine; L-Alanine; L-Lysine; L-Isoleucine; L-Leucine; L-Threonine; L-Tryptophan; L-Methionyl-tRNA; 10-Formyltetrahydrofolate; L-Tyrosine; L-Proline; L-Glutamate; Glutaminyl-tRNA; L-Asparaginyl-tRNA(Asn); L-Seryl-tRNA(Sec); O-Phosphoseryl-tRNA(Sec); L-Histidyl-tRNA(His);…	http://www.genome.jp/kegg-bin/show_pathway?hsa00970
Phenylalanine metabolism	10	2	0.0014843	0.059957	0.0061846	7.0432	L-Phenylalanine,L-Tyrosine	Phenylacetaldehyde; L-Phenylalanine; Phenethylamine; Phenylpyruvate; Benzoyl-CoA; Phenylacetic acid; 2-Hydroxyphenylacetate; 2-Hydroxy-3-phenylpropenoate; Hippurate; L-Tyrosine	http://www.genome.jp/kegg-bin/show_pathway?hsa00360
Phenylalanine, tyrosine and tryptophan biosynthesis	4	2	0.0014843	0.059957	0.0061846	7.0432	L-Phenylalanine,L-Tyrosine	Phenylpyruvate; L-Phenylalanine; L-Tyrosine; 3-(4-Hydroxyphenyl)pyruvate	http://www.genome.jp/kegg-bin/show_pathway?hsa00400
Arginine biosynthesis	14	5	0.0018109	0.068815	0.0069651	4.20618	L-Arginine,N-Acetylornithine,Carbamoyl phosphate,L-Glutamine,Urea	L-Glutamate; L-Arginine; N-Acetylornithine; N-(L-Arginino)succinate; L-Citrulline; L-Aspartate; Carbamoyl phosphate; L-Ornithine; Ammonia; L-Glutamine; 2-Oxoglutarate; N-Acetyl-L-glutamate; Urea; Fumarate	http://www.genome.jp/kegg-bin/show_pathway?hsa00220
Nitrogen metabolism	6	2	0.003213	0.11888	0.011475	6.46339	Carbamoyl phosphate,L-Glutamine	CO2; Ammonia; L-Glutamate; HCO3-; Carbamoyl phosphate; L-Glutamine	http://www.genome.jp/kegg-bin/show_pathway?hsa00910
Alanine, aspartate and glutamate metabolism	28	3	0.0034726	0.12501	0.011575	5.74542	L-Alanine,L-Glutamine,Carbamoyl phosphate	N-Acetyl-L-aspartate; 2-Oxosuccinamate; L-Aspartate; L-Asparagine; D-Aspartate; N-(L-Arginino)succinate; N6-(1,2-Dicarboxyethyl)-AMP; L-Alanine; Succinate semialdehyde; L-Glutamate; 4-Aminobutanoate; L-Glutamine; Ammonia; 2-Oxoglutaramate; (S)-1-Pyrroline-5-carboxylate; N-Acetylaspartylglutamate; N-Acetylaspartylglutamylglutamate; Citrate; Oxaloacetate; Fumarate; Pyruvate; N-Carbamoyl-L-aspartate…	http://www.genome.jp/kegg-bin/show_pathway?hsa00250
beta-Alanine metabolism	21	4	0.0052234	0.18282	0.016025	5.23095	1,3-Diaminopropane,Uracil,L-Histidine,Spermidine	Propanoyl-CoA; 3-Hydroxypropionyl-CoA; 3-Hydroxypropanoate; Malonyl-CoA; 3-Oxopropanoate; beta-Alanine; L-Aspartate; 1,3-Diaminopropane; 3-Aminopropanal; 3-Ureidopropionate; 5,6-Dihydrouracil; Carnosine; beta-Alanyl-N(pi)-methyl-L-histidine; Spermine; Propenoyl-CoA; Acetyl-CoA; beta-Alanyl-L-arginine; Uracil; beta-Alanyl-L-lysine; L-Histidine; Spermidine	http://www.genome.jp/kegg-bin/show_pathway?hsa00410
Tryptophan metabolism	41	4	0.0054779	0.18625	0.016025	4.90325	L-Tryptophan,N-Acetylserotonin,L-Kynurenine,Tryptamine	L-Tryptophan; Melatonin; N-Acetylserotonin; Serotonin; 5-Hydroxyindoleacetate; 5-Hydroxykynurenamine; 5-Hydroxykynurenine; 5-Hydroxy-L-tryptophan; L-Formylkynurenine; Acetoacetyl-CoA; (S)-3-Hydroxybutanoyl-CoA; Crotonoyl-CoA; Glutaryl-CoA; 2-Oxoadipate; 2-Aminomuconate semialdehyde; 2-Amino-3-carboxymuconate semialdehyde; 3-Hydroxyanthranilate; L-Kynurenine; Formylanthranilate; 3-Hydroxy-L-kynure…	http://www.genome.jp/kegg-bin/show_pathway?hsa00380
Histidine metabolism	16	2	0.005769	0.19038	0.016025	6.04583	L-Histidine,Histamine	L-Glutamate; 4-Imidazolone-5-propanoate; Urocanate; L-Histidine; Carnosine; Imidazole-4-acetaldehyde; N-Methylhistamine; Methylimidazole acetaldehyde; Histamine; N(pi)-Methyl-L-histidine; N-Formyl-L-aspartate; N-Formimino-L-glutamate; beta-Alanyl-N(pi)-methyl-L-histidine; Imidazole-4-acetate; Methylimidazoleacetic acid; L-Aspartate	http://www.genome.jp/kegg-bin/show_pathway?hsa00340
Ubiquinone and other terpenoid-quinone biosynthesis	9	1	0.0072264	0.23124	0.018066	5.83529	L-Tyrosine	3-(4-Hydroxyphenyl)pyruvate; L-Tyrosine; Menaquinone; 2,3-Epoxymenaquinone; Phylloquinol; Phylloquinone; Menaquinol; Vitamin K1 epoxide; Homogentisate	http://www.genome.jp/kegg-bin/show_pathway?hsa00130
Tyrosine metabolism	42	1	0.0072264	0.23124	0.018066	5.83529	L-Tyrosine	L-Dopachrome; L-Normetanephrine; 3-Methoxy-4-hydroxyphenylglycolaldehyde; L-Noradrenaline; L-Adrenaline; 3,4-Dihydroxymandelate; 3,4-Dihydroxymandelaldehyde; 3,4-Dihydroxyphenylethyleneglycol; L-Metanephrine; Dopamine; 3,4-Dihydroxyphenylacetaldehyde; 3,4-Dihydroxyphenylacetate; 3-Methoxy-4-hydroxyphenylacetaldehyde; 3-Methoxytyramine; 3,4-Dihydroxy-L-phenylalanine; 3,5-Diiodo-L-tyrosine; 3-Iodo-…	http://www.genome.jp/kegg-bin/show_pathway?hsa00350
Riboflavin metabolism	4	1	0.023136	0.69407	0.055085	4.59591	Riboflavin	Riboflavin; FMN; FAD; Reduced riboflavin	http://www.genome.jp/kegg-bin/show_pathway?hsa00740
Cysteine and methionine metabolism	33	3	0.02856	0.82824	0.064909	4.33158	L-Serine,L-Methionine,L-Cysteine	4-Methylthio-2-oxobutanoic acid; 1,2-Dihydroxy-5-(methylthio)pent-1-en-3-one; S-Methyl-5-thio-D-ribulose 1-phosphate; S-Methyl-5-thio-D-ribose 1-phosphate; 5'-Methylthioadenosine; S-Adenosylmethioninamine; S-Adenosyl-L-methionine; L-Cystathionine; L-Serine; L-Homocysteine; L-Methionine; S-Adenosyl-L-homocysteine; 2,3-Diketo-5-methylthiopentyl-1-phosphate; L-Cysteate; L-Cystine; L-Cysteine; 3-Sulf…	http://www.genome.jp/kegg-bin/show_pathway?hsa00270
Butanoate metabolism	15	1	0.1368	1	0.29739	2.28162	2-Hydroxyglutarate	(R)-3-Hydroxybutanoate; Acetoacetate; (S)-3-Hydroxy-3-methylglutaryl-CoA; Acetyl-CoA; Acetoacetyl-CoA; (S)-3-Hydroxybutanoyl-CoA; Crotonoyl-CoA; 4-Aminobutanoate; L-Glutamate; Butanoyl-CoA; Succinate semialdehyde; Butanoic acid; 2-Oxoglutarate; Succinate; 2-Hydroxyglutarate	http://www.genome.jp/kegg-bin/show_pathway?hsa00650
Glycolysis / Gluconeogenesis	26	1	0.19853	1	0.37859	1.7534	D-Glyceraldehyde 3-phosphate	Acetaldehyde; Ethanol; Thiamin diphosphate; Pyruvate; 2-(alpha-Hydroxyethyl)thiamine diphosphate; Enzyme N6-(lipoyl)lysine; Acetyl-CoA; Enzyme N6-(dihydrolipoyl)lysine; (S)-Lactate; Phosphoenolpyruvate; 2-Phospho-D-glycerate; D-Glyceraldehyde 3-phosphate; beta-D-Fructose 1,6-bisphosphate; beta-D-Fructose 6-phosphate; alpha-D-Glucose 6-phosphate; D-Glucose 1-phosphate; beta-D-Glucose 6-phosphate; …	http://www.genome.jp/kegg-bin/show_pathway?hsa00010
Pentose phosphate pathway	22	1	0.19853	1	0.37859	1.7534	D-Glyceraldehyde 3-phosphate	alpha-D-Glucose 6-phosphate; Deoxyribose; 2-Deoxy-D-ribose 1-phosphate; 2-Deoxy-D-ribose 5-phosphate; D-Ribose 5-phosphate; alpha-D-Ribose 1-phosphate; D-Ribose; Sedoheptulose 7-phosphate; D-Glyceraldehyde 3-phosphate; D-Ribulose 5-phosphate; beta-D-Fructose 6-phosphate; beta-D-Fructose 1,6-bisphosphate; 6-Phospho-D-gluconate; D-Glucono-1,5-lactone 6-phosphate; beta-D-Glucose 6-phosphate; D-Gluco…	http://www.genome.jp/kegg-bin/show_pathway?hsa00030
Inositol phosphate metabolism	30	1	0.19853	1	0.37859	1.7534	D-Glyceraldehyde 3-phosphate	1-Phosphatidyl-1D-myo-inositol 5-phosphate; 1-Phosphatidyl-D-myo-inositol 4,5-bisphosphate; D-myo-Inositol 1,4,5-trisphosphate; 1D-myo-Inositol 1,4,5,6-tetrakisphosphate; Phosphatidylinositol-3,4,5-trisphosphate; 1D-myo-Inositol 1,3,4,5-tetrakisphosphate; 1D-myo-Inositol 1,3,4-trisphosphate; 1D-myo-Inositol 1,3,4,6-tetrakisphosphate; 1D-myo-Inositol 3,4,5,6-tetrakisphosphate; 1D-myo-Inositol 1,4-…	http://www.genome.jp/kegg-bin/show_pathway?hsa00562
Fructose and mannose metabolism	20	2	0.20444	1	0.37859	1.68597	D-Mannose,D-Glyceraldehyde 3-phosphate	D-Sorbitol; D-Fructose; D-Mannose; beta-D-Fructose 2,6-bisphosphate; D-Mannose 6-phosphate; L-Fucose 1-phosphate; GDP-4-dehydro-6-deoxy-D-mannose; GDP-mannose; D-Mannose 1-phosphate; beta-D-Fructose 6-phosphate; D-Glyceraldehyde 3-phosphate; D-Fructose 1-phosphate; D-Glyceraldehyde; beta-D-Fructose 1,6-bisphosphate; 6-Deoxy-L-galactose; L-Fuconate; alpha-D-Glucose; GDP-L-fucose; Glycerone phospha…	http://www.genome.jp/kegg-bin/show_pathway?hsa00051
Drug metabolism - other enzymes	39	1	0.24537	1	0.43816	1.45398	6-Methylthiopurine 5'-monophosphate ribonucleotide	Mercaptopurine (INN); 6-Thioinosine-5'-monophosphate; 6-Thioguanosine monophosphate; 6-Methylmercaptopurine; Tioguanine (INN); 6-Thioxanthine 5'-monophosphate; 6-Mercaptopurine ribonucleoside triphosphate; Isoniazid (JP17/USP/INN); Acetylhydrazine; Fluorouracil (JP17/USP/INN); 5,6-Dihydro-5-fluorouracil; alpha-Fluoro-beta-ureidopropionic acid; 5-Fluorouridine; Floxuridine (USP/INN); Tegafur (JP17…	http://www.genome.jp/kegg-bin/show_pathway?hsa00983
Thiamine metabolism	7	2	0.29346	1	0.50597	1.19163	L-Cysteine,Thiamine	[Enzyme]-cysteine; L-Cysteine; Thiamine; Thiamin triphosphate; Thiamin diphosphate; Thiamin monophosphate; [Enzyme]-S-sulfanylcysteine	http://www.genome.jp/kegg-bin/show_pathway?hsa00730
Sphingolipid metabolism	21	1	0.33332	1	0.52862	1.03029	L-Serine	Dihydroceramide; Ceramide 1-phosphate; Sphingosine 1-phosphate; Sphinganine 1-phosphate; Phytoceramide; Sphinganine; Sphingomyelin; Sphingosine; N-Acylsphingosine; L-Serine; Palmitoyl-CoA; 3-Dehydrosphinganine; Digalactosylceramide; Galactosylceramide; GM4; Lactosylceramide; Glucosylceramide; Sulfatide; Phytosphingosine; Digalactosylceramide sulfate; Ethanolamine phosphate	http://www.genome.jp/kegg-bin/show_pathway?hsa00600
Vitamin B6 metabolism	9	3	0.33676	1	0.52862	1.01637	Pyridoxine,Pyridoxal,Pyridoxamine	O-Phospho-4-hydroxy-L-threonine; Pyridoxine phosphate; Pyridoxamine phosphate; Pyridoxine; Pyridoxal phosphate; Pyridoxal; Pyridoxamine; 2-Oxo-3-hydroxy-4-phosphobutanoate; 4-Pyridoxate	http://www.genome.jp/kegg-bin/show_pathway?hsa00750
Caffeine metabolism	10	3	0.33832	1	0.52862	1.01018	7-Methylxanthine,5-Acetylamino-6-formylamino-3-methyluracil,7-Methyluric acid	1,7-Dimethylxanthine; 1-Methylxanthine; Theobromine; 7-Methylxanthine; Caffeine; 1-Methyluric acid; 3,7-Dimethyluric acid; 1,7-Dimethyluric acid; 5-Acetylamino-6-formylamino-3-methyluracil; 7-Methyluric acid	http://www.genome.jp/kegg-bin/show_pathway?hsa00232
Lysine degradation	25	2	0.36172	1	0.5352	0.925618	L-Lysine,N6,N6,N6-Trimethyl-L-lysine	L-Lysine; 4-Trimethylammoniobutanoate; 4-Trimethylammoniobutanal; N6,N6,N6-Trimethyl-L-lysine; Protein N6-methyl-L-lysine; Protein lysine; Procollagen 5-hydroxy-L-lysine; Protein N6,N6-dimethyl-L-lysine; Crotonoyl-CoA; (S)-3-Hydroxybutanoyl-CoA; N6-(L-1,3-Dicarboxypropyl)-L-lysine; L-2-Aminoadipate 6-semialdehyde; L-2-Aminoadipate; 2-Oxoadipate; Acetoacetyl-CoA; Glutaryl-CoA; L-Pipecolate; 5-Phos…	http://www.genome.jp/kegg-bin/show_pathway?hsa00310
Biotin metabolism	10	1	0.36394	1	0.5352	0.912638	L-Lysine	Biotin; Biotinyl-5'-AMP; Biocytin; Glutaryl-[acp] methyl ester; Malonyl-[acyl-carrier protein]; Malonyl-[acp] methyl ester; Holo-[carboxylase]; L-Lysine; 3-Ketopimeloyl-[acp] methyl ester; 3-Ketoglutaryl-[acp] methyl ester	http://www.genome.jp/kegg-bin/show_pathway?hsa00780
Amino sugar and nucleotide sugar metabolism	37	2	0.445	1	0.60299	0.655722	N-Acetyl-D-glucosamine,D-Mannose	N-Acetyl-D-glucosamine; N-Acetyl-D-glucosamine 6-phosphate; N-Acetyl-alpha-D-glucosamine 1-phosphate; UDP-N-acetyl-alpha-D-glucosamine; N-Acetyl-D-mannosamine; N-Acetylneuraminate 9-phosphate; N-Acetylneuraminate; alpha-D-Galactose 1-phosphate; UDP-glucose; D-Glucose 1-phosphate; UDP-glucuronate; D-Glucosamine 6-phosphate; D-Mannose 6-phosphate; GDP-mannose; D-Fructose 6-phosphate; alpha-D-Glucos…	http://www.genome.jp/kegg-bin/show_pathway?hsa00520
Starch and sucrose metabolism	18	1	0.45623	1	0.60299	0.623371	D-Glucose	Cellodextrin; Cellobiose; D-Fructose; Sucrose; beta-D-Glucoside; UDP-glucose; D-Glucose 1-phosphate; D-Glucose 6-phosphate; D-Glucose; Amylose; alpha,alpha-Trehalose; Maltodextrin; Starch; Maltose; Dextrin; Isomaltose; D-Fructose 6-phosphate; alpha-D-Glucose 1,6-bisphosphate	http://www.genome.jp/kegg-bin/show_pathway?hsa00500
Neomycin, kanamycin and gentamicin biosynthesis	2	1	0.45623	1	0.60299	0.623371	D-Glucose	D-Glucose; D-Glucose 6-phosphate	http://www.genome.jp/kegg-bin/show_pathway?hsa00524
Galactose metabolism	27	3	0.45828	1	0.60299	0.624471	Raffinose,D-Glucose,D-Mannose	Stachyose; D-Tagatose 6-phosphate; D-Gal alpha 1->6D-Gal alpha 1->6D-Glucose; Sucrose; Raffinose; Melibiose; D-Galactose; 3-beta-D-Galactosyl-sn-glycerol; Epimelibiose; Melibiitol; alpha-D-Galactosyl-(1->3)-1D-myo-inositol; alpha-D-Glucose; Lactose; D-Glucose 1-phosphate; UDP-alpha-D-galactose; UDP-glucose; alpha-D-Galactose 1-phosphate; alpha-D-Galactose; alpha-D-Glucose 6-phosphate; D-Tagatose …	http://www.genome.jp/kegg-bin/show_pathway?hsa00052
Primary bile acid biosynthesis	46	3	0.4955	1	0.62169	0.800174	Cholesterol,Taurine,Cholic acid	Cholesterol; Cholest-5-ene-3beta,26-diol; 25-Hydroxycholesterol; 4-Cholesten-7alpha,12alpha-diol-3-one; 7alpha-Hydroxycholest-4-en-3-one; 7alpha,12alpha-Dihydroxy-5beta-cholestan-3-one; 3alpha,7alpha,12alpha-Trihydroxy-5beta-cholestane; (25R)-3alpha,7alpha,12alpha-Trihydroxy-5beta-cholestan-26-oyl-CoA; (25S)-3alpha,7alpha,12alpha-Trihydroxy-5beta-cholestan-26-oyl-CoA; 7alpha-Hydroxy-5beta-cholest…	http://www.genome.jp/kegg-bin/show_pathway?hsa00120
Steroid biosynthesis	42	1	0.51139	1	0.62169	0.48741	Cholesterol	Vitamin D3; Delta7-Avenasterol; Zymosterol; Calcidiol; 7-Dehydrocholesterol; Lathosterol; 5alpha-Cholest-8-en-3beta-ol; Episterol; 24-Methylenecholesterol; 5-Dehydroepisterol; Cholesterol; 7-Dehydrodesmosterol; 14-Demethyllanosterol; Isofucosterol; Obtusifoliol; 4alpha-Methyl-5alpha-ergosta-8,14,24(28)-trien-3beta-ol; 5-Dehydroavenasterol; (S)-2,3-Epoxysqualene; 4,4-Dimethyl-5alpha-cholesta-8,14,…	http://www.genome.jp/kegg-bin/show_pathway?hsa00100
Steroid hormone biosynthesis	85	2	0.51815	1	0.62169	0.487949	Cholesterol,Testosterone	Cholesterol; 20alpha,22beta-Dihydroxycholesterol; 20alpha-Hydroxycholesterol; 17alpha,20alpha-Dihydroxycholesterol; Pregnenolone; 21-Hydroxypregnenolone; 17alpha-Hydroxypregnenolone; 17alpha,21-Dihydroxypregnenolone; 11beta,17alpha,21-Trihydroxypregnenolone; Dehydroepiandrosterone; Dehydroepiandrosterone sulfate; 16alpha-Hydroxydehydroepiandrosterone; Androstenediol; 11-Deoxycorticosterone; 5alph…	http://www.genome.jp/kegg-bin/show_pathway?hsa00140
Pentose and glucuronate interconversions	18	1	0.52222	1	0.62169	0.463375	D-Xylose	beta-D-Glucuronoside; D-Ribulose 5-phosphate; D-Ribitol 5-phosphate; D-Xylulose; L-Arabitol; Xylitol; L-Gulonate; D-Glucose 1-phosphate; UDP-glucuronate; UDP-glucose; D-Xylose; D-Glucuronate; D-Xylulose 5-phosphate; CDP-ribitol; L-Arabinose; L-Xylulose; 3-Dehydro-L-gulonate; D-Xylonolactone	http://www.genome.jp/kegg-bin/show_pathway?hsa00040
One carbon pool by folate	9	2	0.60759	1	0.69879	0.300696	Folinic acid,10-Formyltetrahydrofolate	5,10-Methylenetetrahydrofolate; 5-Methyltetrahydrofolate; 5-Formiminotetrahydrofolate; 5,10-Methenyltetrahydrofolate; Folinic acid; 10-Formyltetrahydrofolate; Tetrahydrofolate; Dihydrofolate; Folate	http://www.genome.jp/kegg-bin/show_pathway?hsa00670
Porphyrin and chlorophyll metabolism	30	1	0.61493	1	0.69879	0.288717	Porphobilinogen	Cobinamide; Heme O; Heme; Glycine; Bilirubin beta-diglucuronide; Cob(I)yrinate a,c diamide; Fe2+; Biliverdin; Cob(I)alamin; Protoporphyrinogen IX; Coproporphyrinogen III; Uroporphyrinogen III; Hydroxymethylbilane; Porphobilinogen; 5-Aminolevulinate; Uroporphyrinogen I; L-Glutamate; Bilirubin; Protoporphyrin; Coproporphyrin III; Adenosyl cobinamide; Heme A; D-Urobilinogen; Adenosyl cobyrinate a,c …	http://www.genome.jp/kegg-bin/show_pathway?hsa00860
Pyrimidine metabolism	39	10	0.65566	1	0.71346	0.24541	L-Glutamine,Carbamoyl phosphate,Uridine,CDP,Cytidine,dCMP,Deoxyuridine,Thymidine,Thymine,Uracil	UDP; L-Glutamine; Carbamoyl phosphate; (S)-Dihydroorotate; Orotidine 5'-phosphate; UMP; UTP; Uridine; 5,6-Dihydrouracil; 3-Ureidopropionate; CTP; CDP; CMP; Cytidine; dCDP; dCMP; dCTP; Deoxycytidine; dUTP; dUDP; dUMP; Deoxyuridine; dTDP; dTTP; dTMP; Thymidine; Thymine; (R)-5,6-Dihydrothymine; (R)-3-Ureidoisobutyrate; P1,P4-Bis(5'-uridyl) tetraphosphate; 2'-Deoxy-5-hydroxymethylcytidine-5'-diphosph…	http://www.genome.jp/kegg-bin/show_pathway?hsa00240
Glyoxylate and dicarboxylate metabolism	32	2	0.66565	1	0.71346	0.441716	L-Serine,L-Glutamine	Hydroxypyruvate; cis-Aconitate; 4-Hydroxy-2-oxoglutarate; N-Formylderivatives; Glycolate; Citrate; (S)-Malate; 2-Phosphoglycolate; Acetyl-CoA; (S)-Methylmalonyl-CoA; Propanoyl-CoA; (R)-Methylmalonyl-CoA; Glyoxylate; L-Serine; Glycine; Hydrogen peroxide; L-Glutamate; (2S)-Ethylmalonyl-CoA; D-Glycerate; Acetate; 2-Hydroxy-3-oxopropanoate; Isocitrate; Pyruvate; Formate; Oxaloacetate; Acetoacetyl-CoA…	http://www.genome.jp/kegg-bin/show_pathway?hsa00630
Taurine and hypotaurine metabolism	8	3	0.67302	1	0.71346	0.445665	L-Cysteine,Taurine,Hypotaurine	L-Cysteate; L-Cysteine; Cysteamine; 3-Sulfino-L-alanine; Taurine; Hypotaurine; 5-L-Glutamyl-taurine; Taurocholate	http://www.genome.jp/kegg-bin/show_pathway?hsa00430
D-Glutamine and D-glutamate metabolism	6	1	0.68492	1	0.71346	0.188716	L-Glutamine	D-Glutamate; L-Glutamate; D-Glutamine; L-Glutamine; 5-Oxo-D-proline; 2-Oxoglutarate	http://www.genome.jp/kegg-bin/show_pathway?hsa00471
Selenocompound metabolism	20	1	0.85204	1	0.86943	0.04015	L-Alanine	Selenite; Hydrogen selenide; L-Selenocysteine; L-Selenomethionine; Se-Methyl-L-selenocysteine; O-Phosphoseryl-tRNA(Sec); Selenophosphoric acid; L-Seryl-tRNA(Sec); Selenate; L-Selenocystathionine; Selenohomocysteine; Methylselenic acid; Dimethyl selenide; L-Alanine; Selenomethionyl-tRNA(Met); Methaneselenol; Methylselenopyruvate; L-Selenocysteinyl-tRNA(Sec); Adenylylselenate; Trimethylselenonium	http://www.genome.jp/kegg-bin/show_pathway?hsa00450
Nicotinate and nicotinamide metabolism	15	1	0.91588	1	0.91588	0.012892	N1-Methyl-2-pyridone-5-carboxamide	L-Aspartate; Deamino-NAD+; Quinolinate; Nicotinate D-ribonucleoside; Nicotinate D-ribonucleotide; NAD+; Nicotinamide D-ribonucleotide; Nicotinamide-beta-riboside; Nicotinamide; 1-Methylnicotinamide; NADP+; Iminoaspartate; Nicotinate; N1-Methyl-4-pyridone-5-carboxamide; N1-Methyl-2-pyridone-5-carboxamide	http://www.genome.jp/kegg-bin/show_pathway?hsa00760
