# Supplementary figures and images for: Proteomic and metabolomic dissection of the BRAF V600E mutation-induced cellular state transition in lung epithelial cells
Source: Royal Society of Chemistry journal article supplement (doi:10.1039/d4mo00249k), 2025-04-22

**A**

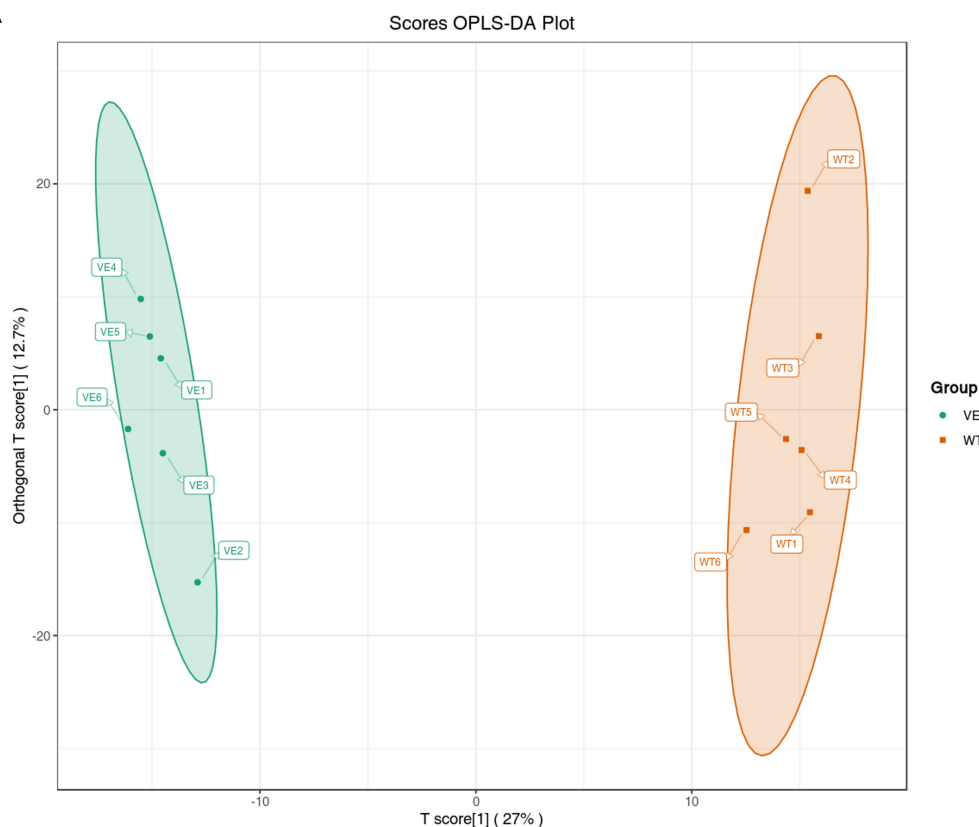

**B**

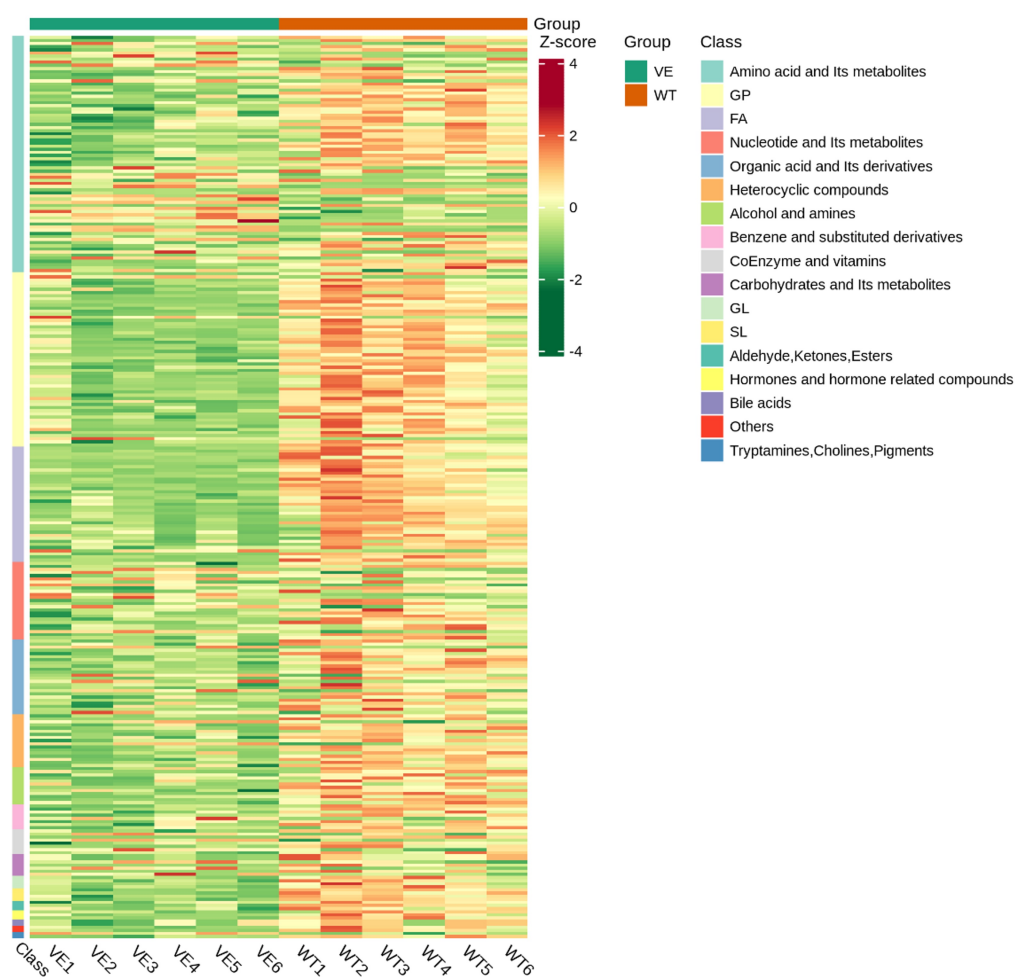

Supplement: d4mo00249k3.pdf [file d4mo00249k3.pdf]
